# Supplementary material for: Downregulated genes by silencing MYC pathway identified with RNA-SEQ analysis as potential prognostic biomarkers in gastric adenocarcinoma
Source: Aging (Albany NY). 2020 Dec 22;12(24):24651–70. doi: 10.18632/aging.202260 (PMC7803532; doi:10.18632/aging.202260)
Supplement: Supplementary Table 1 [file aging-12-202260-s001.xlsx]

## Sheet: Supplementary Table S1.
Supplementary Table 1. A total of 5,327 DEGs identified in the ACP 02 lineage, of which 4,098 DEGs with a downregulated profile and 1,229 with an upregulated profile. MYC-siRNA: (2M) vs. Control-siRNA: (2C).
Symbol	gene-ID	N0.2C	N0.2M	N0.2C-NE	N0.2M-NE	Log2 Ratio(N0.2M-NE/N0.2C-NE)	p-value	FDR	Description	Expression Profile
CCT6A	908	1899.54	0	13.5042	0.001	-13.7211	0	0	chaperonin containing TCP1, subunit 6A (zeta 1)	Downregulated
RNU2-1	6066	97.7274	0	10.8278	0.001	-13.4025	1.89605e-29	8.19573e-29	RNA, U2 small nuclear 1	Downregulated
GARS	2617	1115.7	0	7.70901	0.001	-12.9123	0	0	glycyl-tRNA synthetase	Downregulated
CDK4	1019	698.034	0	6.6026	0.001	-12.6888	1.94425e-207	1.61011e-205	cyclin-dependent kinase 4	Downregulated
COPS7B	64708	646.256	0	4.78469	0.001	-12.2242	4.88436e-192	3.55463e-190	COP9 signalosome subunit 7B	Downregulated
SEPT9	10801	894.019	0	4.58618	0.001	-12.1631	1.7474e-265	2.20871e-263	septin 9	Downregulated
SEC61G	23480	111.329	0	4.55562	0.001	-12.1534	1.35419e-33	6.66168e-33	Sec61 gamma subunit	Downregulated
MRPL16	54948	278.546	0	4.47613	0.001	-12.128	4.71858e-83	7.35853e-82	mitochondrial ribosomal protein L16	Downregulated
BOP1	23246	553.261	0	4.34943	0.001	-12.0866	1.703e-164	9.04848e-163	block of proliferation 1	Downregulated
NHP2	55651	167.18	0	4.13786	0.001	-12.0147	3.52376e-50	2.66625e-49	NHP2 ribonucleoprotein	Downregulated
UQCRH	7388	126.963	0	3.96939	0.001	-11.9547	4.89054e-38	2.69879e-37	ubiquinol-cytochrome c reductase hinge protein	Downregulated
KARS	3735	448.594	0	3.89867	0.001	-11.9288	2.12558e-133	7.31346e-132	lysyl-tRNA synthetase	Downregulated
MAF1	84232	364.417	0	3.81241	0.001	-11.8965	1.60136e-108	3.91633e-107	MAF1 homolog (S. cerevisiae)	Downregulated
RRAS2	22800	455.004	0	3.67928	0.001	-11.8452	1.79636e-135	6.4583e-134	related RAS viral (r-ras) oncogene homolog 2	Downregulated
RILP	83547	346.092	0	3.66318	0.001	-11.8389	3.42988e-103	7.83004e-102	Rab interacting lysosomal protein	Downregulated
DENR	8562	501.436	0	3.50046	0.001	-11.7733	4.27828e-149	1.80258e-147	density-regulated protein	Downregulated
PLAGL1	5325	530.57	0	3.48066	0.001	-11.7651	1.10351e-157	5.40855e-156	pleiomorphic adenoma gene-like 1	Downregulated
NFYC	4802	418.283	0	3.38945	0.001	-11.7268	1.62977e-124	4.96706e-123	nuclear transcription factor Y, gamma	Downregulated
PPIAL4B	653505	130.721	0	3.2248	0.001	-11.655	3.19696e-39	1.82371e-38	peptidylprolyl isomerase A (cyclophilin A)-like 4B	Downregulated
RNF181	51255	118.429	0	3.20998	0.001	-11.6483	1.14445e-35	5.96983e-35	ring finger protein 181	Downregulated
TM9SF1	10548	410.936	0	3.16789	0.001	-11.6293	3.81386e-122	1.13079e-120	transmembrane 9 superfamily member 1	Downregulated
NDUFS5	4725	93.7113	0	3.15358	0.001	-11.6228	2.90048e-28	1.20183e-27	NADH dehydrogenase (ubiquinone) Fe-S protein 5, 15kDa (NADH-coenzyme Q reductase)	Downregulated
DPP7	29952	268.706	0	3.15033	0.001	-11.6213	4.31878e-80	6.22568e-79	dipeptidyl-peptidase 7	Downregulated
NRAS	4893	736.559	0	3.14513	0.001	-11.6189	1.08359e-218	9.56748e-217	neuroblastoma RAS viral (v-ras) oncogene homolog	Downregulated
ATP5EP2	432369	58.203	0	3.14165	0.001	-11.6173	6.72808e-18	1.9865e-17	ATP synthase, H+ transporting, mitochondrial F1 complex, epsilon subunit pseudogene 2	Downregulated
C22orf28	51493	340.824	0	3.12853	0.001	-11.6113	2.05214e-101	4.50495e-100	RNA 2',3'-cyclic phosphate and 5'-OH ligase	Downregulated
PHB2	11331	237.108	0	3.11964	0.001	-11.6072	6.54882e-71	7.87169e-70	prohibitin 2	Downregulated
NAE1	8883	295.928	0	3.10964	0.001	-11.6025	4.3569e-88	7.61538e-87	NEDD8 activating enzyme E1 subunit 1	Downregulated
MED27	9442	210.604	0	3.08594	0.001	-11.5915	6.4915e-63	6.51755e-62	mediator complex subunit 27	Downregulated
GTF2E1	2960	480.127	0	3.01609	0.001	-11.5585	7.08796e-143	2.78145e-141	general transcription factor IIE, polypeptide 1, alpha 56kDa	Downregulated
CAV2	858	475.331	0	3.01294	0.001	-11.557	2.14436e-141	8.25304e-140	caveolin 2	Downregulated
CYB561D2	11068	171.116	0	2.87859	0.001	-11.4911	2.3035e-51	1.79847e-50	cytochrome b561 family, member D2	Downregulated
TTLL12	23170	495.573	0	2.75828	0.001	-11.4296	2.55976e-147	1.05992e-145	tubulin tyrosine ligase-like family member 12	Downregulated
ZMYND19	116225	195.844	0	2.74039	0.001	-11.4202	1.7975e-58	1.63766e-57	zinc finger, MYND-type containing 19	Downregulated
NARS	4677	412.16	0	2.73897	0.001	-11.4194	9.75112e-123	2.93462e-121	asparaginyl-tRNA synthetase	Downregulated
TIMM13	26517	286.006	0	2.73257	0.001	-11.416	2.01638e-85	3.29873e-84	translocase of inner mitochondrial membrane 13 homolog (yeast)	Downregulated
FLOT2	2319	380.173	0	2.72627	0.001	-11.4127	2.92424e-113	7.61698e-112	flotillin 2	Downregulated
SNW1	22938	300.299	0	2.67238	0.001	-11.3839	1.44014e-89	2.56957e-88	SNW domain containing 1	Downregulated
TMEM53	79639	315.951	0	2.67234	0.001	-11.3839	5.20092e-94	9.96055e-93	transmembrane protein 53	Downregulated
CD74	972	178.137	0	2.58621	0.001	-11.3366	1.94671e-53	1.59455e-52	CD74 molecule, major histocompatibility complex, class II invariant chain	Downregulated
ANP32A	8125	334.275	0	2.57238	0.001	-11.3289	1.22783e-99	2.63752e-98	acidic (leucine-rich) nuclear phosphoprotein 32 family, member A	Downregulated
TOMM6	100188893	116.587	0	2.55656	0.001	-11.32	4.47616e-35	2.29308e-34	translocase of outer mitochondrial membrane 6 homolog (yeast)	Downregulated
LY6E	4061	157.823	0	2.5513	0.001	-11.317	3.22518e-47	2.25294e-46	lymphocyte antigen 6 complex, locus E	Downregulated
ARHGAP1	392	461.04	0	2.53701	0.001	-11.3089	3.00238e-137	1.10253e-135	Rho GTPase activating protein 1	Downregulated
RAB10	10890	503.72	0	2.53278	0.001	-11.3065	1.09385e-149	4.65779e-148	RAB10, member RAS oncogene family	Downregulated
MRPL46	26589	133.122	0	2.51459	0.001	-11.2961	4.13308e-40	2.41509e-39	mitochondrial ribosomal protein L46	Downregulated
PTGES2	80142	196.423	0	2.49288	0.001	-11.2836	9.08896e-59	8.35044e-58	prostaglandin E synthase 2	Downregulated
MRPS18A	55168	156.404	0	2.49012	0.001	-11.282	6.37838e-47	4.43495e-46	mitochondrial ribosomal protein S18A	Downregulated
LUC7L3	51747	344.813	0	2.46841	0.001	-11.2694	1.34149e-102	2.98308e-101	LUC7-like 3 (S. cerevisiae)	Downregulated
EMC4	51234	136.482	0	2.46737	0.001	-11.2688	5.34328e-41	3.2017e-40	ER membrane protein complex subunit 4	Downregulated
NTAN1	123803	159.191	0	2.46409	0.001	-11.2668	8.24604e-48	5.86602e-47	N-terminal asparagine amidase	Downregulated
NDRG2	57447	253.078	0	2.4451	0.001	-11.2557	1.19587e-75	1.6009e-74	NDRG family member 2	Downregulated
MFSD2A	84879	244.79	0	2.42184	0.001	-11.2419	5.5345e-73	6.9517e-72	major facilitator superfamily domain containing 2A	Downregulated
PRPF38A	84950	347.366	0	2.38191	0.001	-11.2179	1.7343e-103	3.97432e-102	pre-mRNA processing factor 38A	Downregulated
TIMM17A	10440	208.445	0	2.38191	0.001	-11.2179	2.53896e-62	2.50929e-61	translocase of inner mitochondrial membrane 17 homolog A (yeast)	Downregulated
TAP2	6891	400.841	0	2.37749	0.001	-11.2152	3.4907e-119	9.93278e-118	transporter 2, ATP-binding cassette, sub-family B (MDR/TAP)	Downregulated
CDKN3	1033	96.1446	0	2.36874	0.001	-11.2099	3.74976e-29	1.60811e-28	cyclin-dependent kinase inhibitor 3	Downregulated
APPL1	26060	748.426	0	2.34609	0.001	-11.196	3.02696e-222	2.73291e-220	adaptor protein, phosphotyrosine interaction, PH domain and leucine zipper containing 1	Downregulated
TIMM8B	26521	99.1877	0	2.33154	0.001	-11.1871	4.84774e-30	2.13386e-29	translocase of inner mitochondrial membrane 8 homolog B (yeast)	Downregulated
MRPL20	55052	87.4151	0	2.26253	0.001	-11.1437	1.7354e-26	6.82116e-26	mitochondrial ribosomal protein L20	Downregulated
NDUFV1	4723	189.392	0	2.26102	0.001	-11.1428	1.07547e-56	9.42646e-56	NADH dehydrogenase (ubiquinone) flavoprotein 1, 51kDa	Downregulated
TMX2-CTNND1	100528016	743.759	0	2.2604	0.001	-11.1424	9.1576e-221	8.2063e-219	TMX2-CTNND1 readthrough (NMD candidate)	Downregulated
LRRC70	100130733	268.812	0	2.24062	0.001	-11.1297	4.31878e-80	6.24066e-79	leucine rich repeat containing 70	Downregulated
NIP7	51388	269.276	0	2.21427	0.001	-11.1126	2.18376e-80	3.17465e-79	NIP7, nucleolar pre-rRNA processing protein	Downregulated
UNC50	25972	133.792	0	2.20421	0.001	-11.106	4.13308e-40	2.41862e-39	unc-50 homolog (C. elegans)	Downregulated
TIMM44	10469	229.496	0	2.17403	0.001	-11.0862	1.53251e-68	1.7443e-67	translocase of inner mitochondrial membrane 44 homolog (yeast)	Downregulated
SNORA4	619568	13.7337	0	2.16834	0.001	-11.0824	0.000142844	0.000220784	small nucleolar RNA, H/ACA box 4	Downregulated
LPCAT1	79888	453.492	0	2.1604	0.001	-11.0771	7.02592e-135	2.48871e-133	lysophosphatidylcholine acyltransferase 1	Downregulated
ARFGEF1	10565	821.554	0	2.15525	0.001	-11.0736	7.27276e-244	8.08623e-242	ADP-ribosylation factor guanine nucleotide-exchange factor 1 (brefeldin A-inhibited)	Downregulated
ALKBH2	121642	95.1076	0	2.14514	0.001	-11.0669	7.41582e-29	3.14106e-28	alkB, alkylation repair homolog 2 (E. coli)	Downregulated
NAPSA	9476	160.693	0	2.14251	0.001	-11.0651	4.16956e-48	2.9945e-47	napsin A aspartic peptidase	Downregulated
TFPI2	7980	261.991	0	2.11132	0.001	-11.0439	5.11028e-78	7.08594e-77	tissue factor pathway inhibitor 2	Downregulated
IMP4	92856	117.413	0	2.10456	0.001	-11.0393	2.26334e-35	1.16845e-34	IMP4, U3 small nucleolar ribonucleoprotein	Downregulated
C11orf73	51501	124.661	0	2.09037	0.001	-11.0295	1.91279e-37	1.04025e-36	chromosome 11 open reading frame 73	Downregulated
HMBS	3145	152.533	0	2.08057	0.001	-11.0228	9.7573e-46	6.63452e-45	hydroxymethylbilane synthase	Downregulated
EXT2	2132	377.211	0	2.0703	0.001	-11.0156	2.26192e-112	5.79129e-111	exostosin glycosyltransferase 2	Downregulated
ELK2AP	2003	84.4883	0	2.06545	0.001	-11.0122	1.34234e-25	5.11547e-25	ELK2A, member of ETS oncogene family, pseudogene	Downregulated
KIAA0319L	79932	523.332	0	2.06349	0.001	-11.0109	1.30575e-155	6.17302e-154	KIAA0319-like	Downregulated
NDUFB8	4714	80.343	0	2.05423	0.001	-11.0044	2.05344e-24	7.55213e-24	NADH dehydrogenase (ubiquinone) 1 beta subcomplex, 8, 19kDa	Downregulated
PSMG3	84262	84.3416	0	2.01052	0.001	-10.9734	1.34234e-25	5.11385e-25	proteasome (prosome, macropain) assembly chaperone 3	Downregulated
HIST1H2AB	8335	48.3481	0	1.99132	0.001	-10.9595	6.158e-15	1.61594e-14	histone cluster 1, H2ab	Downregulated
IMMP1L	196294	77.8437	0	1.99033	0.001	-10.9588	1.58835e-23	5.6546e-23	IMP1 inner mitochondrial membrane peptidase-like (S. cerevisiae)	Downregulated
LBR	3930	399.596	0	1.98708	0.001	-10.9564	6.90348e-119	1.95512e-117	lamin B receptor	Downregulated
UBE2B	7320	274.094	0	1.98434	0.001	-10.9544	7.21824e-82	1.08481e-80	ubiquitin-conjugating enzyme E2B	Downregulated
FAM69A	388650	89.6505	0	1.98426	0.001	-10.9544	4.437e-27	1.7748e-26	family with sequence similarity 69, member A	Downregulated
LRWD1	222229	230.1	0	1.97889	0.001	-10.9505	7.74902e-69	8.86193e-68	leucine-rich repeats and WD repeat domain containing 1	Downregulated
ZCCHC17	51538	143.192	0	1.9788	0.001	-10.9504	4.51568e-43	2.836e-42	zinc finger, CCHC domain containing 17	Downregulated
STX12	23673	321.738	0	1.97847	0.001	-10.9502	8.69262e-96	1.72816e-94	syntaxin 12	Downregulated
STOML2	30968	133.232	0	1.97824	0.001	-10.95	4.13308e-40	2.41626e-39	stomatin (EPB72)-like 2	Downregulated
SLC35B1	10237	164.157	0	1.96969	0.001	-10.9438	2.72566e-49	2.01662e-48	solute carrier family 35, member B1	Downregulated
ATP6V0B	533	134.262	0	1.96732	0.001	-10.942	2.08986e-40	1.23075e-39	ATPase, H+ transporting, lysosomal 21kDa, V0 subunit b	Downregulated
DLST	1743	294.848	0	1.96698	0.001	-10.9418	8.61656e-88	1.49089e-86	dihydrolipoamide S-succinyltransferase (E2 component of 2-oxo-glutarate complex)	Downregulated
CSTF1	1477	235.81	0	1.96332	0.001	-10.9391	2.56138e-70	3.03623e-69	cleavage stimulation factor, 3' pre-RNA, subunit 1, 50kDa	Downregulated
CHST12	55501	218.789	0	1.96083	0.001	-10.9372	2.774e-65	2.92966e-64	carbohydrate (chondroitin 4) sulfotransferase 12	Downregulated
AP1M1	8907	243.198	0	1.95571	0.001	-10.9335	1.09454e-72	1.36625e-71	adaptor-related protein complex 1, mu 1 subunit	Downregulated
PTCD1	26024	565.58	0	1.95254	0.001	-10.9311	4.75724e-168	2.62041e-166	pentatricopeptide repeat domain 1	Downregulated
DEDD2	162989	154.422	0	1.94916	0.001	-10.9286	2.4947e-46	1.71867e-45	death effector domain containing 2	Downregulated
STX8	9482	92.4042	0	1.94781	0.001	-10.9276	5.7362e-28	2.35327e-27	syntaxin 8	Downregulated
SS18L2	51188	82.3812	0	1.93888	0.001	-10.921	5.25016e-25	1.96644e-24	synovial sarcoma translocation gene on chromosome 18-like 2	Downregulated
SP140	11262	85.3636	0	1.93227	0.001	-10.9161	6.78748e-26	2.60646e-25	SP140 nuclear body protein	Downregulated
KIAA1841	84542	464.187	0	1.9223	0.001	-10.9086	3.8815e-138	1.43412e-136	KIAA1841	Downregulated
SLC25A22	79751	265.713	0	1.9127	0.001	-10.9014	3.3406e-79	4.74721e-78	solute carrier family 25 (mitochondrial carrier: glutamate), member 22	Downregulated
E2F4	1874	208.094	0	1.89274	0.001	-10.8863	2.53896e-62	2.51342e-61	E2F transcription factor 4, p107/p130-binding	Downregulated
TAF1A	9015	194.457	0	1.8903	0.001	-10.8844	3.55488e-58	3.22166e-57	TATA box binding protein (TBP)-associated factor, RNA polymerase I, A, 48kDa	Downregulated
XKR6	286046	372.054	0	1.88274	0.001	-10.8786	6.84306e-111	1.70127e-109	XK, Kell blood group complex subunit-related family, member 6	Downregulated
SNX10	29887	230.636	0	1.87942	0.001	-10.8761	7.74902e-69	8.88732e-68	sorting nexin 10	Downregulated
ATP6V1G1	9550	157.904	0	1.87682	0.001	-10.8741	3.22518e-47	2.25163e-46	ATPase, H+ transporting, lysosomal 13kDa, V1 subunit G1	Downregulated
CRIP2	1397	102.219	0	1.87234	0.001	-10.8706	6.26722e-31	2.83346e-30	cysteine-rich protein 2	Downregulated
CHST11	50515	566.806	0	1.87217	0.001	-10.8705	2.40546e-168	1.33726e-166	carbohydrate (chondroitin 4) sulfotransferase 11	Downregulated
COX7C	1350	42.5115	0	1.86874	0.001	-10.8679	3.68442e-13	9.02724e-13	cytochrome c oxidase subunit VIIc	Downregulated
LIN7C	55327	478.101	0	1.86804	0.001	-10.8673	2.77224e-142	1.07732e-140	lin-7 homolog C (C. elegans)	Downregulated
CCBL2	56267	201.18	0	1.86112	0.001	-10.862	3.00428e-60	2.85407e-59	cysteine conjugate-beta lyase 2	Downregulated
MON1A	84315	192.221	0	1.86103	0.001	-10.8619	1.39038e-57	1.24131e-56	MON1 secretory trafficking family member A	Downregulated
EIF2B1	1967	183.338	0	1.8585	0.001	-10.8599	6.4347e-55	5.41471e-54	eukaryotic translation initiation factor 2B, subunit 1 alpha, 26kDa	Downregulated
ALAS1	211	220.754	0	1.85638	0.001	-10.8583	7.09246e-66	7.59735e-65	5'-aminolevulinate synthase 1	Downregulated
ZNF134	7693	218.53	0	1.8558	0.001	-10.8578	2.774e-65	2.92708e-64	zinc finger protein 134	Downregulated
MBNL2	10150	451.175	0	1.85544	0.001	-10.8575	2.74798e-134	9.64846e-133	muscleblind-like splicing regulator 2	Downregulated
MRPL49	740	190.927	0	1.85409	0.001	-10.8565	5.43806e-57	4.80149e-56	mitochondrial ribosomal protein L49	Downregulated
DTNA	1837	166.189	0	1.83804	0.001	-10.844	6.96884e-50	5.23339e-49	dystrobrevin, alpha	Downregulated
TSPO	706	67.1103	0	1.83475	0.001	-10.8414	1.45377e-20	4.70029e-20	translocator protein (18kDa)	Downregulated
NME2	4831	64.8854	0	1.81293	0.001	-10.8241	1.1245e-19	3.52376e-19	NME/NM23 nucleoside diphosphate kinase 2	Downregulated
WDR36	134430	630.018	0	1.81019	0.001	-10.8219	2.67476e-187	1.87828e-185	WD repeat domain 36	Downregulated
TIPRL	261726	129.432	0	1.80027	0.001	-10.814	6.32256e-39	3.57277e-38	TOR signaling pathway regulator	Downregulated
QARS	5859	263.415	0	1.79715	0.001	-10.8115	1.30658e-78	1.84364e-77	glutaminyl-tRNA synthetase	Downregulated
NTMT1	28989	129.824	0	1.79537	0.001	-10.8101	6.32256e-39	3.57782e-38	N-terminal Xaa-Pro-Lys N-methyltransferase 1	Downregulated
SNORA75	654321	11.3277	0	1.78846	0.001	-10.8045	0.00055869	0.000825692	small nucleolar RNA, H/ACA box 75	Downregulated
SPIRE1	56907	479.016	0	1.78546	0.001	-10.8021	1.40177e-142	5.46507e-141	spire-type actin nucleation factor 1	Downregulated
EIF4E	1977	318.41	0	1.78006	0.001	-10.7977	6.72382e-95	1.30436e-93	eukaryotic translation initiation factor 4E	Downregulated
DDAH2	23564	118.435	0	1.77944	0.001	-10.7972	1.14445e-35	5.96465e-35	dimethylarginine dimethylaminohydrolase 2	Downregulated
DOK4	55715	256.566	0	1.7786	0.001	-10.7965	1.54604e-76	2.09772e-75	docking protein 4	Downregulated
TAB1	10454	188.36	0	1.7708	0.001	-10.7902	2.12694e-56	1.85478e-55	TGF-beta activated kinase 1/MAP3K7 binding protein 1	Downregulated
SSSCA1	10534	71.901	0	1.76915	0.001	-10.7888	9.50336e-22	3.19654e-21	Sjogren syndrome/scleroderma autoantigen 1	Downregulated
GTF3C3	9330	171.986	0	1.7661	0.001	-10.7864	2.3035e-51	1.7973e-50	general transcription factor IIIC, polypeptide 3, 102kDa	Downregulated
NDUFA13	51079	50.2216	0	1.76204	0.001	-10.783	1.57445e-15	4.23428e-15	NADH dehydrogenase (ubiquinone) 1 alpha subcomplex, 13	Downregulated
UBE2I	7329	262.426	0	1.75936	0.001	-10.7808	2.58398e-78	3.61637e-77	ubiquitin-conjugating enzyme E2I	Downregulated
EXOSC4	54512	86.0923	0	1.752	0.001	-10.7748	3.43204e-26	1.33762e-25	exosome component 4	Downregulated
UFD1L	7353	162.572	0	1.74971	0.001	-10.7729	1.06606e-48	7.78663e-48	ubiquitin fusion degradation 1 like (yeast)	Downregulated
SF3B14	51639	70.6489	0	1.74742	0.001	-10.771	1.87945e-21	6.25339e-21	splicing factor 3b, subunit 6, 14kDa	Downregulated
CFDP1	10428	115.562	0	1.73216	0.001	-10.7584	8.8524e-35	4.4928e-34	craniofacial development protein 1	Downregulated
ACOT7	11332	128.241	0	1.72807	0.001	-10.7549	1.2504e-38	7.02609e-38	acyl-CoA thioesterase 7	Downregulated
GINS3	64785	189.418	0	1.72755	0.001	-10.7545	1.07547e-56	9.44024e-56	GINS complex subunit 3 (Psf3 homolog)	Downregulated
MOGS	7841	263.306	0	1.72437	0.001	-10.7519	1.30658e-78	1.84148e-77	mannosyl-oligosaccharide glucosidase	Downregulated
DDX54	79039	398.581	0	1.72231	0.001	-10.7501	1.36529e-118	3.83046e-117	DEAD (Asp-Glu-Ala-Asp) box polypeptide 54	Downregulated
MRPS33	51650	61.1155	0	1.7205	0.001	-10.7486	8.69814e-19	2.6349e-18	mitochondrial ribosomal protein S33	Downregulated
MOB4	25843	342.424	0	1.72039	0.001	-10.7485	5.24684e-102	1.1603e-100	MOB family member 4, phocein	Downregulated
EEFSEC	60678	202.321	0	1.71507	0.001	-10.7441	1.51909e-60	1.45118e-59	eukaryotic elongation factor, selenocysteine-tRNA-specific	Downregulated
MAPK3	5595	128.913	0	1.71477	0.001	-10.7438	1.2504e-38	7.01296e-38	mitogen-activated protein kinase 3	Downregulated
POLR3K	51728	73.8874	0	1.71344	0.001	-10.7427	2.42978e-22	8.31959e-22	polymerase (RNA) III (DNA directed) polypeptide K, 12.3 kDa	Downregulated
CHTOP	26097	194.29	0	1.70814	0.001	-10.7382	3.55488e-58	3.21923e-57	chromatin target of PRMT1	Downregulated
SBNO1	55206	987.59	0	1.70688	0.001	-10.7371	5.0117e-293	7.71545e-291	strawberry notch homolog 1 (Drosophila)	Downregulated
PET112	5188	199.622	0	1.70671	0.001	-10.737	1.17503e-59	1.10146e-58	glutamyl-tRNA(Gln) amidotransferase, subunit B	Downregulated
CKS1B	1163	73.0611	0	1.69428	0.001	-10.7265	2.42978e-22	8.31722e-22	CDC28 protein kinase regulatory subunit 1B	Downregulated
SBDS	51119	141.496	0	1.68816	0.001	-10.7212	1.76617e-42	1.09264e-41	Shwachman-Bodian-Diamond syndrome	Downregulated
LSMD1	84316	89.3951	0	1.68359	0.001	-10.7173	4.437e-27	1.7695e-26	N(alpha)-acetyltransferase 38, NatC auxiliary subunit	Downregulated
RSRC2	65117	207.122	0	1.68274	0.001	-10.7166	5.02122e-62	4.95031e-61	arginine/serine-rich coiled-coil 2	Downregulated
WDR75	84128	239.698	0	1.6826	0.001	-10.7165	1.67438e-71	2.03501e-70	WD repeat domain 75	Downregulated
AKTIP	64400	192.856	0	1.67916	0.001	-10.7135	1.39038e-57	1.24039e-56	AKT interacting protein	Downregulated
TFIP11	24144	253.165	0	1.67181	0.001	-10.7072	1.19587e-75	1.59733e-74	tuftelin interacting protein 11	Downregulated
CSNK2A3	283106	122.568	0	1.65988	0.001	-10.6969	7.4813e-37	4.00158e-36	casein kinase 2, alpha 3 polypeptide	Downregulated
LTBR	4055	180.834	0	1.65432	0.001	-10.692	4.97728e-54	4.11903e-53	lymphotoxin beta receptor (TNFR superfamily, member 3)	Downregulated
TST	7263	95.2139	0	1.64893	0.001	-10.6873	7.41582e-29	3.14439e-28	thiosulfate sulfurtransferase (rhodanese)	Downregulated
CDV3	55573	287.374	0	1.6466	0.001	-10.6853	1.01957e-85	1.67713e-84	CDV3 homolog (mouse)	Downregulated
APBB1	322	166.971	0	1.64551	0.001	-10.6843	6.96884e-50	5.22358e-49	amyloid beta (A4) precursor protein-binding, family B, member 1 (Fe65)	Downregulated
ADPRHL2	54936	145.584	0	1.63791	0.001	-10.6776	1.15455e-43	7.34316e-43	ADP-ribosylhydrolase like 2	Downregulated
QSER1	79832	804.55	0	1.63325	0.001	-10.6735	7.87648e-239	8.22441e-237	glutamine and serine rich 1	Downregulated
ATP5E	514	37.2159	0	1.63217	0.001	-10.6726	1.11466e-11	2.53406e-11	ATP synthase, H+ transporting, mitochondrial F1 complex, epsilon subunit	Downregulated
RAI14	26064	421.77	0	1.6288	0.001	-10.6696	2.10698e-125	6.55456e-124	retinoic acid induced 14	Downregulated
-	101730217	538.537	0	1.62678	0.001	-10.6678	4.7156e-160	2.3792e-158	SPECC1L-ADORA2A readthrough (NMD candidate)	Downregulated
HAUS4	54930	127.906	0	1.61879	0.001	-10.6607	2.47288e-38	1.37347e-37	HAUS augmin-like complex, subunit 4	Downregulated
PPA1	5464	110.904	0	1.61755	0.001	-10.6596	2.67816e-33	1.30729e-32	pyrophosphatase (inorganic) 1	Downregulated
UCN	7349	50.9181	0	1.61321	0.001	-10.6557	1.57445e-15	4.22954e-15	urocortin	Downregulated
PUM2	23369	528.732	0	1.6069	0.001	-10.6501	4.31604e-157	2.0898e-155	pumilio RNA-binding family member 2	Downregulated
SLC44A2	57153	283.357	0	1.59872	0.001	-10.6427	1.55969e-84	2.49716e-83	solute carrier family 44 (choline transporter), member 2	Downregulated
RFC1	5981	411.095	0	1.59616	0.001	-10.6404	1.92846e-122	5.78922e-121	replication factor C (activator 1) 1, 145kDa	Downregulated
SAMD8	142891	569.51	0	1.59497	0.001	-10.6393	3.10982e-169	1.76145e-167	sterile alpha motif domain containing 8	Downregulated
CAMK2N1	55450	197.734	0	1.59145	0.001	-10.6361	4.59578e-59	4.25491e-58	calcium/calmodulin-dependent protein kinase II inhibitor 1	Downregulated
YARS2	51067	180.39	0	1.5852	0.001	-10.6304	4.97728e-54	4.12187e-53	tyrosyl-tRNA synthetase 2, mitochondrial	Downregulated
CEP170P1	645455	89.8142	0	1.58438	0.001	-10.6297	4.437e-27	1.76832e-26	centrosomal protein 170kDa pseudogene 1	Downregulated
PSIMCT-1	100101490	68.6951	0	1.58334	0.001	-10.6288	7.35092e-21	2.39538e-20	malignant T cell amplified sequence 2, pseudogene	Downregulated
COMMD10	51397	119.328	0	1.57108	0.001	-10.6175	5.78684e-36	3.0331e-35	COMM domain containing 10	Downregulated
ATP5L	10632	109.816	0	1.56907	0.001	-10.6157	5.29652e-33	2.55219e-32	ATP synthase, H+ transporting, mitochondrial Fo complex, subunit G	Downregulated
MUC1	4582	68.9621	0	1.56662	0.001	-10.6134	7.35092e-21	2.40452e-20	mucin 1, cell surface associated	Downregulated
PA2G4	5036	215.947	0	1.55802	0.001	-10.6055	2.1457e-64	2.22309e-63	proliferation-associated 2G4, 38kDa	Downregulated
CSTF2	1478	164.4	0	1.54962	0.001	-10.5977	2.72566e-49	2.02035e-48	cleavage stimulation factor, 3' pre-RNA, subunit 2, 64kDa	Downregulated
COA3	28958	64.4976	0	1.54485	0.001	-10.5933	1.1245e-19	3.521e-19	cytochrome c oxidase assembly factor 3	Downregulated
OCIAD2	132299	54.6457	0	1.53714	0.001	-10.586	1.02922e-16	2.89979e-16	OCIA domain containing 2	Downregulated
EIF5	1983	482.087	0	1.5361	0.001	-10.5851	1.81222e-143	7.1819e-142	eukaryotic translation initiation factor 5	Downregulated
NOC4L	79050	136.361	0	1.52961	0.001	-10.5789	5.34328e-41	3.2049e-40	nucleolar complex associated 4 homolog (S. cerevisiae)	Downregulated
ARHGEF2	9181	330.299	0	1.52557	0.001	-10.5751	1.87827e-98	3.94305e-97	Rho/Rac guanine nucleotide exchange factor (GEF) 2	Downregulated
BAX	581	52.7943	0	1.51653	0.001	-10.5666	4.0255e-16	1.10639e-15	BCL2-associated X protein	Downregulated
UHRF2	115426	289.393	0	1.51461	0.001	-10.5647	2.6068e-86	4.36575e-85	ubiquitin-like with PHD and ring finger domains 2, E3 ubiquitin protein ligase	Downregulated
MOB1B	92597	209.748	0	1.51336	0.001	-10.5635	1.28381e-62	1.27933e-61	MOB kinase activator 1B	Downregulated
C20orf27	54976	103.128	0	1.50762	0.001	-10.5581	3.16898e-31	1.44305e-30	chromosome 20 open reading frame 27	Downregulated
NDUFS7	374291	61.6805	0	1.49438	0.001	-10.5453	8.69814e-19	2.63623e-18	NADH dehydrogenase (ubiquinone) Fe-S protein 7, 20kDa (NADH-coenzyme Q reductase)	Downregulated
MGC72080	389538	56.0495	0	1.49356	0.001	-10.5445	2.63148e-17	7.59039e-17	MGC72080 pseudogene	Downregulated
FLJ39632	642477	138.183	0	1.48708	0.001	-10.5383	1.36615e-41	8.2894e-41	long intergenic non-protein coding RNA 1296	Downregulated
-	101928062	69.2309	0	1.48545	0.001	-10.5367	3.71696e-21	1.22653e-20	long intergenic non-protein coding RNA 1481	Downregulated
KIAA0930	23313	490.971	0	1.48357	0.001	-10.5349	7.74412e-146	3.13102e-144	KIAA0930	Downregulated
CTNNBL1	56259	154.286	0	1.48307	0.001	-10.5344	2.4947e-46	1.71768e-45	catenin, beta like 1	Downregulated
CBFB	865	245.187	0	1.48271	0.001	-10.534	2.79848e-73	3.53728e-72	core-binding factor, beta subunit	Downregulated
PPIE	10450	87.4269	0	1.48025	0.001	-10.5316	1.7354e-26	6.8301e-26	peptidylprolyl isomerase E (cyclophilin E)	Downregulated
HSPBP1	23640	132.607	0	1.47961	0.001	-10.531	8.17388e-40	4.73478e-39	HSPA (heat shock 70kDa) binding protein, cytoplasmic cochaperone 1	Downregulated
AAAS	8086	143.447	0	1.47946	0.001	-10.5309	4.51568e-43	2.83303e-42	achalasia, adrenocortical insufficiency, alacrimia	Downregulated
SYT17	51760	147.469	0	1.47438	0.001	-10.5259	2.95192e-44	1.915e-43	synaptotagmin XVII	Downregulated
SRSF10	10772	373.408	0	1.47395	0.001	-10.5255	3.46016e-111	8.69239e-110	serine/arginine-rich splicing factor 10	Downregulated
C3orf38	285237	214.979	0	1.47306	0.001	-10.5246	4.24352e-64	4.37392e-63	chromosome 3 open reading frame 38	Downregulated
POGZ	23126	477.231	0	1.47115	0.001	-10.5227	5.4826e-142	2.11688e-140	pogo transposable element with ZNF domain	Downregulated
OSGEP	55644	125.407	0	1.46214	0.001	-10.5139	9.6719e-38	5.28631e-37	O-sialoglycoprotein endopeptidase	Downregulated
RABL2A	11159	86.7312	0	1.45934	0.001	-10.5111	3.43204e-26	1.33372e-25	RAB, member of RAS oncogene family-like 2A	Downregulated
MAGOH	4116	58.1502	0	1.45923	0.001	-10.511	6.72808e-18	1.9826e-17	mago-nashi homolog, proliferation-associated (Drosophila)	Downregulated
APEX1	328	113.425	0	1.45201	0.001	-10.5038	3.46236e-34	1.73089e-33	APEX nuclease (multifunctional DNA repair enzyme) 1	Downregulated
GLRX5	51218	89.2238	0	1.45102	0.001	-10.5029	4.437e-27	1.77185e-26	glutaredoxin 5	Downregulated
NSA2	10412	114.283	0	1.45025	0.001	-10.5021	1.75072e-34	8.82932e-34	NSA2 ribosome biogenesis homolog (S. cerevisiae)	Downregulated
TCEA1	6917	169.07	0	1.43321	0.001	-10.485	9.00942e-51	6.92606e-50	transcription elongation factor A (SII), 1	Downregulated
RNF167	26001	128.62	0	1.4284	0.001	-10.4802	1.2504e-38	7.01952e-38	ring finger protein 167	Downregulated
FRMD8	83786	271.084	0	1.42781	0.001	-10.4796	5.58336e-81	8.26695e-80	FERM domain containing 8	Downregulated
CDK1	983	130.16	0	1.42134	0.001	-10.473	3.19696e-39	1.82458e-38	cyclin-dependent kinase 1	Downregulated
MED13	9969	783.708	0	1.41993	0.001	-10.4716	1.30493e-232	1.27395e-230	mediator complex subunit 13	Downregulated
UFC1	51506	82.7557	0	1.41635	0.001	-10.468	5.25016e-25	1.96032e-24	ubiquitin-fold modifier conjugating enzyme 1	Downregulated
HRSP12	10247	74.2307	0	1.41487	0.001	-10.4665	1.2286e-22	4.24061e-22	heat-responsive protein 12	Downregulated
CDC16	8881	165.139	0	1.41061	0.001	-10.4621	1.37821e-49	1.02538e-48	cell division cycle 16	Downregulated
ZNF622	90441	125.96	0	1.4096	0.001	-10.4611	9.6719e-38	5.29354e-37	zinc finger protein 622	Downregulated
DNAJC30	84277	186.555	0	1.40425	0.001	-10.4556	8.31884e-56	7.12501e-55	DnaJ (Hsp40) homolog, subfamily C, member 30	Downregulated
IGLL5	100423062	71.2268	0	1.40416	0.001	-10.4555	9.50336e-22	3.19475e-21	immunoglobulin lambda-like polypeptide 5	Downregulated
MYO1D	4642	160.554	0	1.40123	0.001	-10.4525	4.16956e-48	2.99629e-47	myosin ID	Downregulated
UBE2J2	118424	167.892	0	1.39756	0.001	-10.4487	3.52376e-50	2.67129e-49	ubiquitin-conjugating enzyme E2, J2	Downregulated
POMGNT1	55624	201.539	0	1.39561	0.001	-10.4467	3.00428e-60	2.85633e-59	protein O-linked mannose N-acetylglucosaminyltransferase 1 (beta 1,2-)	Downregulated
ZNF593	51042	46.8104	0	1.39446	0.001	-10.4455	2.40852e-14	6.16926e-14	zinc finger protein 593	Downregulated
MTF2	22823	282.631	0	1.39229	0.001	-10.4432	3.08456e-84	4.91239e-83	metal response element binding transcription factor 2	Downregulated
B4GALT1	2683	307.448	0	1.38788	0.001	-10.4387	1.21708e-91	2.24842e-90	UDP-Gal:betaGlcNAc beta 1,4- galactosyltransferase, polypeptide 1	Downregulated
PPIC	5480	89.2288	0	1.38116	0.001	-10.4317	4.437e-27	1.77126e-26	peptidylprolyl isomerase C (cyclophilin C)	Downregulated
DDRGK1	65992	93.0648	0	1.37644	0.001	-10.4267	2.90048e-28	1.20515e-27	DDRGK domain containing 1	Downregulated
ARHGEF25	115557	162.473	0	1.37421	0.001	-10.4244	1.06606e-48	7.79137e-48	Rho guanine nucleotide exchange factor (GEF) 25	Downregulated
CIRH1A	84916	162.986	0	1.37181	0.001	-10.4219	1.06606e-48	7.77245e-48	cirrhosis, autosomal recessive 1A (cirhin)	Downregulated
RAB34	83871	82.8179	0	1.37037	0.001	-10.4203	5.25016e-25	1.96521e-24	RAB34, member RAS oncogene family	Downregulated
UQCR10	29796	66.2286	0	1.36835	0.001	-10.4182	2.8751e-20	9.18197e-20	ubiquinol-cytochrome c reductase, complex III subunit X	Downregulated
BRWD3	254065	921.646	0	1.36675	0.001	-10.4165	1.76282e-273	2.4331e-271	bromodomain and WD repeat domain containing 3	Downregulated
PARG	8505	212.183	0	1.36596	0.001	-10.4157	1.65972e-63	1.68755e-62	poly (ADP-ribose) glycohydrolase	Downregulated
NUDT21	11051	316.488	0	1.36588	0.001	-10.4156	2.62982e-94	5.04455e-93	nudix (nucleoside diphosphate linked moiety X)-type motif 21	Downregulated
SYS1-DBNDD2	767557	95.6229	0	1.36525	0.001	-10.4149	7.41582e-29	3.14773e-28	SYS1-DBNDD2 readthrough (NMD candidate)	Downregulated
ITCH	83737	467.083	0	1.35769	0.001	-10.4069	5.01806e-139	1.85978e-137	itchy E3 ubiquitin protein ligase	Downregulated
IKBKB	3551	285.675	0	1.35616	0.001	-10.4053	3.98774e-85	6.47967e-84	inhibitor of kappa light polypeptide gene enhancer in B-cells, kinase beta	Downregulated
PNKD	25953	67.6356	0	1.35583	0.001	-10.405	1.45377e-20	4.71298e-20	paroxysmal nonkinesigenic dyskinesia	Downregulated
TUBGCP5	114791	279.592	0	1.35236	0.001	-10.4013	2.38592e-83	3.73535e-82	tubulin, gamma complex associated protein 5	Downregulated
METRNL	284207	114.992	0	1.34818	0.001	-10.3968	1.75072e-34	8.80344e-34	meteorin, glial cell differentiation regulator-like	Downregulated
MMP11	4320	160.496	0	1.34607	0.001	-10.3945	4.16956e-48	3.00348e-47	matrix metallopeptidase 11	Downregulated
TRMT1	55621	152.007	0	1.34326	0.001	-10.3915	9.7573e-46	6.63828e-45	tRNA methyltransferase 1 homolog (S. cerevisiae)	Downregulated
AKAP10	11216	277.881	0	1.34168	0.001	-10.3898	9.33182e-83	1.43662e-81	A kinase (PRKA) anchor protein 10	Downregulated
CYB5A	1528	58.9083	0	1.33983	0.001	-10.3878	6.72808e-18	1.98454e-17	cytochrome b5 type A (microsomal)	Downregulated
SEC61B	10952	40.0193	0	1.33959	0.001	-10.3876	1.44105e-12	3.40968e-12	Sec61 beta subunit	Downregulated
ACOT8	10005	82.7701	0	1.33917	0.001	-10.3871	5.25016e-25	1.96337e-24	acyl-CoA thioesterase 8	Downregulated
GMNN	51053	73.0783	0	1.33902	0.001	-10.387	2.42978e-22	8.32196e-22	geminin, DNA replication inhibitor	Downregulated
FOXD2-AS1	84793	177.064	0	1.33652	0.001	-10.3843	3.84996e-53	3.1279e-52	FOXD2 antisense RNA 1 (head to head)	Downregulated
HYAL2	8692	139.683	0	1.33121	0.001	-10.3785	6.90786e-42	4.21278e-41	hyaluronoglucosaminidase 2	Downregulated
IPO13	9670	281.535	0	1.32554	0.001	-10.3724	6.10024e-84	9.65108e-83	importin 13	Downregulated
SKP1	6500	140.048	0	1.31942	0.001	-10.3657	3.49292e-42	2.14432e-41	S-phase kinase-associated protein 1	Downregulated
TSPAN15	23555	118.953	0	1.31872	0.001	-10.3649	1.14445e-35	5.96206e-35	tetraspanin 15	Downregulated
PXDC1	221749	152.492	0	1.31683	0.001	-10.3629	9.7573e-46	6.64204e-45	PX domain containing 1	Downregulated
TBCA	6902	45.7332	0	1.30886	0.001	-10.3541	4.76326e-14	1.20797e-13	tubulin folding cofactor A	Downregulated
KLC2	64837	189.124	0	1.30248	0.001	-10.347	1.07547e-56	9.43334e-56	kinesin light chain 2	Downregulated
MMP1	4312	130.514	0	1.29891	0.001	-10.3431	3.19696e-39	1.82631e-38	matrix metallopeptidase 1	Downregulated
CA2	760	112.74	0	1.29532	0.001	-10.3391	6.8474e-34	3.38229e-33	carbonic anhydrase II	Downregulated
RDH10	157506	270.829	0	1.29444	0.001	-10.3381	1.10421e-80	1.61897e-79	retinol dehydrogenase 10 (all-trans)	Downregulated
CD97	976	218.714	0	1.29331	0.001	-10.3369	2.774e-65	2.93224e-64	adhesion G protein-coupled receptor E5	Downregulated
ARPP19	10776	350.362	0	1.29018	0.001	-10.3334	2.24212e-104	5.20762e-103	cAMP-regulated phosphoprotein, 19kDa	Downregulated
RGPD6	729540	223.243	0	1.28676	0.001	-10.3295	9.1692e-67	1.00368e-65	RANBP2-like and GRIP domain containing 6	Downregulated
RSRC1	51319	104.156	0	1.27396	0.001	-10.3151	1.60238e-31	7.38915e-31	arginine/serine-rich coiled-coil 1	Downregulated
CLNS1A	1207	91.2283	0	1.26996	0.001	-10.3106	1.13443e-27	4.61459e-27	chloride channel, nucleotide-sensitive, 1A	Downregulated
CAMK2D	817	271.967	0	1.26934	0.001	-10.3099	5.58336e-81	8.24662e-80	calcium/calmodulin-dependent protein kinase II delta	Downregulated
IFT46	56912	113.724	0	1.26371	0.001	-10.3034	3.46236e-34	1.72515e-33	intraflagellar transport 46	Downregulated
RANBP3	8498	211.292	0	1.25333	0.001	-10.2916	3.2824e-63	3.30941e-62	RAN binding protein 3	Downregulated
GCC1	79571	271.762	0	1.24518	0.001	-10.2821	5.58336e-81	8.23648e-80	GRIP and coiled-coil domain containing 1	Downregulated
EMC2	9694	82.1465	0	1.24409	0.001	-10.2809	5.25016e-25	1.96154e-24	ER membrane protein complex subunit 2	Downregulated
C2CD2L	9854	221.654	0	1.24161	0.001	-10.278	3.58626e-66	3.86569e-65	C2CD2-like	Downregulated
TCEB2	6923	39.5106	0	1.24141	0.001	-10.2778	2.84992e-12	6.65795e-12	transcription elongation factor B (SIII), polypeptide 2 (18kDa, elongin B)	Downregulated
CCDC174	51244	193.794	0	1.24126	0.001	-10.2776	7.03038e-58	6.30948e-57	coiled-coil domain containing 174	Downregulated
GABPA	2551	309.725	0	1.24113	0.001	-10.2774	3.11178e-92	5.80221e-91	GA binding protein transcription factor, alpha subunit 60kDa	Downregulated
LINC00266-1	140849	46.175	0	1.23915	0.001	-10.2751	2.40852e-14	6.16663e-14	long intergenic non-protein coding RNA 266-1	Downregulated
NAA25	80018	379.737	0	1.23873	0.001	-10.2746	5.78318e-113	1.49665e-111	N(alpha)-acetyltransferase 25, NatB auxiliary subunit	Downregulated
TRAPPC9	83696	280.295	0	1.23845	0.001	-10.2743	1.20643e-83	1.89618e-82	trafficking protein particle complex 9	Downregulated
SHMT1	6470	158.063	0	1.23747	0.001	-10.2732	1.6308e-47	1.14921e-46	serine hydroxymethyltransferase 1 (soluble)	Downregulated
MRPL10	124995	114.386	0	1.23344	0.001	-10.2685	1.75072e-34	8.81821e-34	mitochondrial ribosomal protein L10	Downregulated
WDR85	92715	120.263	0	1.2323	0.001	-10.2671	2.92608e-36	1.53972e-35	diphthamide biosynthesis 7	Downregulated
LEMD3	23592	310.271	0	1.23016	0.001	-10.2646	1.57346e-92	2.9522e-91	LEM domain containing 3	Downregulated
LINC00673	100499467	146.279	0	1.22738	0.001	-10.2614	5.83794e-44	3.74877e-43	long intergenic non-protein coding RNA 673	Downregulated
HEATR1	55127	548.446	0	1.22534	0.001	-10.259	5.15214e-163	2.68987e-161	HEAT repeat containing 1	Downregulated
P4HA1	5033	188.592	0	1.21699	0.001	-10.2491	2.12694e-56	1.85343e-55	prolyl 4-hydroxylase, alpha polypeptide I	Downregulated
C16orf13	84326	61.0836	0	1.21692	0.001	-10.249	8.69814e-19	2.63689e-18	chromosome 16 open reading frame 13	Downregulated
SNN	8303	211.204	0	1.21626	0.001	-10.2482	3.2824e-63	3.31219e-62	stannin	Downregulated
ERRFI1	54206	200.258	0	1.21334	0.001	-10.2448	5.94148e-60	5.61774e-59	ERBB receptor feedback inhibitor 1	Downregulated
ORC6	23594	104.133	0	1.21261	0.001	-10.2439	1.60238e-31	7.40052e-31	origin recognition complex, subunit 6	Downregulated
KIAA0020	9933	141.735	0	1.21233	0.001	-10.2436	1.76617e-42	1.08928e-41	KIAA0020	Downregulated
PUS1	80324	103.314	0	1.20827	0.001	-10.2387	3.16898e-31	1.4425e-30	pseudouridylate synthase 1	Downregulated
ATP6AP2	10159	129.132	0	1.20698	0.001	-10.2372	6.32256e-39	3.57109e-38	ATPase, H+ transporting, lysosomal accessory protein 2	Downregulated
NDRG3	57446	177.432	0	1.20619	0.001	-10.2362	3.84996e-53	3.13001e-52	NDRG family member 3	Downregulated
LZTR1	8216	274.396	0	1.2048	0.001	-10.2346	7.21824e-82	1.08346e-80	leucine-zipper-like transcription regulator 1	Downregulated
HAUS7	55559	86.301	0	1.20137	0.001	-10.2305	3.43204e-26	1.33156e-25	HAUS augmin-like complex, subunit 7	Downregulated
TRAPPC6A	79090	44.9939	0	1.19896	0.001	-10.2276	9.42018e-14	2.3576e-13	trafficking protein particle complex 6A	Downregulated
RPUSD2	27079	121.96	0	1.19848	0.001	-10.227	1.47956e-36	7.85088e-36	RNA pseudouridylate synthase domain containing 2	Downregulated
DIS3L2	129563	155.794	0	1.19792	0.001	-10.2263	1.26144e-46	8.71036e-46	DIS3 like 3'-5' exoribonuclease 2	Downregulated
DDIT4	54541	109.555	0	1.19633	0.001	-10.2244	5.29652e-33	2.55527e-32	DNA-damage-inducible transcript 4	Downregulated
CENPV	201161	73.4676	0	1.19581	0.001	-10.2238	2.42978e-22	8.31485e-22	centromere protein V	Downregulated
XPR1	9213	523.037	0	1.19564	0.001	-10.2236	1.30575e-155	6.14881e-154	xenotropic and polytropic retrovirus receptor 1	Downregulated
ZSWIM1	90204	174.777	0	1.19543	0.001	-10.2233	2.97798e-52	2.38238e-51	zinc finger, SWIM-type containing 1	Downregulated
TARBP2	6895	117.847	0	1.19334	0.001	-10.2208	2.26334e-35	1.16895e-34	TAR (HIV-1) RNA binding protein 2	Downregulated
PGM2	55276	202.42	0	1.19065	0.001	-10.2175	1.51909e-60	1.45233e-59	phosphoglucomutase 2	Downregulated
NT5DC1	221294	199.557	0	1.19044	0.001	-10.2173	1.17503e-59	1.10405e-58	5'-nucleotidase domain containing 1	Downregulated
HEXB	3074	119.296	0	1.18832	0.001	-10.2147	5.78684e-36	3.03443e-35	hexosaminidase B (beta polypeptide)	Downregulated
DCPS	28960	92.8927	0	1.18595	0.001	-10.2118	5.7362e-28	2.36053e-27	decapping enzyme, scavenger	Downregulated
THAP11	57215	117.893	0	1.18431	0.001	-10.2098	2.26334e-35	1.16996e-34	THAP domain containing 11	Downregulated
RBM34	23029	107.159	0	1.18312	0.001	-10.2084	2.07158e-32	9.84001e-32	RNA binding motif protein 34	Downregulated
CGN	57530	319.414	0	1.18312	0.001	-10.2084	3.39986e-95	6.6383e-94	cingulin	Downregulated
TOR3A	64222	132.201	0	1.18091	0.001	-10.2057	8.17388e-40	4.7325e-39	torsin family 3, member A	Downregulated
VPS33A	65082	162.349	0	1.17805	0.001	-10.2022	1.06606e-48	7.77717e-48	vacuolar protein sorting 33 homolog A (S. cerevisiae)	Downregulated
LOC440434	440434	101.534	0	1.17656	0.001	-10.2004	1.23945e-30	5.53696e-30	aminopeptidase puromycin sensitive pseudogene	Downregulated
CPNE2	221184	138.709	0	1.17583	0.001	-10.1995	1.36615e-41	8.28103e-41	copine II	Downregulated
SLC39A4	55630	42.1409	0	1.17413	0.001	-10.1974	3.68442e-13	8.99421e-13	solute carrier family 39 (zinc transporter), member 4	Downregulated
VEZT	55591	282.209	0	1.17176	0.001	-10.1945	3.08456e-84	4.91891e-83	vezatin, adherens junctions transmembrane protein	Downregulated
CAMSAP2	23271	450.651	0	1.16896	0.001	-10.191	5.43462e-134	1.90259e-132	calmodulin regulated spectrin-associated protein family, member 2	Downregulated
ATP5I	521	18.5413	0	1.16706	0.001	-10.1887	4.72158e-06	8.03411e-06	ATP synthase, H+ transporting, mitochondrial Fo complex, subunit E	Downregulated
LRRC8C	84230	441.306	0	1.16287	0.001	-10.1835	2.51514e-131	8.45989e-130	leucine rich repeat containing 8 family, member C	Downregulated
HERC2P3	283755	262.348	0	1.16268	0.001	-10.1832	2.58398e-78	3.62906e-77	hect domain and RLD 2 pseudogene 3	Downregulated
SAMM50	25813	107.707	0	1.16208	0.001	-10.1825	2.07158e-32	9.82834e-32	SAMM50 sorting and assembly machinery component	Downregulated
STC1	6781	237.574	0	1.16008	0.001	-10.18	6.54882e-71	7.87958e-70	stanniocalcin 1	Downregulated
FAM69B	138311	141.397	0	1.1562	0.001	-10.1752	1.76617e-42	1.0904e-41	family with sequence similarity 69, member B	Downregulated
GET4	51608	127.335	0	1.15486	0.001	-10.1735	2.47288e-38	1.3741e-37	golgi to ER traffic protein 4 homolog (S. cerevisiae)	Downregulated
ZXDC	79364	292.779	0	1.15347	0.001	-10.1718	3.3701e-87	5.74832e-86	ZXD family zinc finger C	Downregulated
FGGY	55277	71.1706	0	1.15347	0.001	-10.1718	9.50336e-22	3.19296e-21	FGGY carbohydrate kinase domain containing	Downregulated
TMA7	51372	28.8353	0	1.15257	0.001	-10.1706	5.15868e-09	1.0397e-08	translation machinery associated 7 homolog (S. cerevisiae)	Downregulated
SNX4	8723	149.808	0	1.15201	0.001	-10.1699	7.54734e-45	5.0071e-44	sorting nexin 4	Downregulated
GRK5	2869	155.5	0	1.15172	0.001	-10.1696	1.26144e-46	8.72542e-46	G protein-coupled receptor kinase 5	Downregulated
EIF2B5	8893	175.024	0	1.15099	0.001	-10.1687	1.5058e-52	1.20947e-51	eukaryotic translation initiation factor 2B, subunit 5 epsilon, 82kDa	Downregulated
MED23	9439	270.829	0	1.14889	0.001	-10.166	1.10421e-80	1.62094e-79	mediator complex subunit 23	Downregulated
CLPB	81570	184.267	0	1.13422	0.001	-10.1475	3.25366e-55	2.75918e-54	ClpB homolog, mitochondrial AAA ATPase chaperonin	Downregulated
MOB1A	55233	78.9445	0	1.13396	0.001	-10.1472	8.03142e-24	2.88401e-23	MOB kinase activator 1A	Downregulated
LOC101054525	101054525	72.1162	0	1.13293	0.001	-10.1458	4.80532e-22	1.63093e-21	progesterone receptor antisense RNA	Downregulated
PHIP	55023	713.071	0	1.13063	0.001	-10.1429	7.02148e-212	5.89608e-210	pleckstrin homology domain interacting protein	Downregulated
LCAT	3931	79.5918	0	1.12786	0.001	-10.1394	4.06104e-24	1.4746e-23	lecithin-cholesterol acyltransferase	Downregulated
NET1	10276	236.104	0	1.1245	0.001	-10.1351	1.29514e-70	1.54901e-69	neuroepithelial cell transforming 1	Downregulated
DERA	51071	98.9805	0	1.11958	0.001	-10.1287	9.58726e-30	4.20007e-29	deoxyribose-phosphate aldolase (putative)	Downregulated
DLSTP1	1744	177.512	0	1.11956	0.001	-10.1287	3.84996e-53	3.13851e-52	dihydrolipoamide S-succinyltransferase pseudogene 1	Downregulated
ORC1	4998	186.454	0	1.1179	0.001	-10.1266	8.31884e-56	7.13009e-55	origin recognition complex, subunit 1	Downregulated
CRSP8P	441089	79.317	0	1.11728	0.001	-10.1258	4.06104e-24	1.47773e-23	mediator complex subunit 27 pseudogene	Downregulated
PDK1	5163	172.095	0	1.11628	0.001	-10.1245	1.16475e-51	9.15933e-51	pyruvate dehydrogenase kinase, isozyme 1	Downregulated
DIS3L	115752	217.513	0	1.11469	0.001	-10.1224	5.48606e-65	5.7484e-64	DIS3 like exosome 3'-5' exoribonuclease	Downregulated
RSL24D1	51187	86.1513	0	1.11036	0.001	-10.1168	3.43204e-26	1.332e-25	ribosomal L24 domain containing 1	Downregulated
USB1	79650	170.704	0	1.10969	0.001	-10.1159	4.55556e-51	3.53151e-50	U6 snRNA biogenesis 1	Downregulated
THOC1	9984	123.86	0	1.10901	0.001	-10.1151	3.78288e-37	2.04248e-36	THO complex 1	Downregulated
-	101409258	52.9771	0	1.10419	0.001	-10.1088	4.0255e-16	1.10538e-15	OSGEPL1 antisense RNA 1	Downregulated
IER5L	389792	157.721	0	1.10388	0.001	-10.1084	3.22518e-47	2.25687e-46	immediate early response 5-like	Downregulated
KPNA1	3836	400.066	0	1.10298	0.001	-10.1072	3.4907e-119	9.95637e-118	karyopherin alpha 1 (importin alpha 5)	Downregulated
TMUB1	83590	104.194	0	1.10099	0.001	-10.1046	1.60238e-31	7.41764e-31	transmembrane and ubiquitin-like domain containing 1	Downregulated
SDHD	6392	87.4371	0	1.09854	0.001	-10.1014	1.7354e-26	6.81893e-26	succinate dehydrogenase complex, subunit D, integral membrane protein	Downregulated
RPUSD4	84881	139.951	0	1.09703	0.001	-10.0994	6.90786e-42	4.2085e-41	RNA pseudouridylate synthase domain containing 4	Downregulated
GPT2	84706	228.018	0	1.09587	0.001	-10.0979	3.0308e-68	3.43662e-67	glutamic pyruvate transaminase (alanine aminotransferase) 2	Downregulated
NHP2L1	4809	86.8808	0	1.09518	0.001	-10.097	3.43204e-26	1.33502e-25	NHP2 non-histone chromosome protein 2-like 1 (S. cerevisiae)	Downregulated
DRG1	4733	83.5646	0	1.09188	0.001	-10.0926	2.65472e-25	1.00434e-24	developmentally regulated GTP binding protein 1	Downregulated
PSMG2	56984	56.5563	0	1.09116	0.001	-10.0916	2.63148e-17	7.56858e-17	proteasome (prosome, macropain) assembly chaperone 2	Downregulated
SCARB2	950	248.185	0	1.0877	0.001	-10.0871	3.61792e-74	4.67642e-73	scavenger receptor class B, member 2	Downregulated
NME4	4833	65.7015	0	1.08629	0.001	-10.0852	5.686e-20	1.79772e-19	NME/NM23 nucleoside diphosphate kinase 4	Downregulated
CAND2	23066	242.493	0	1.08586	0.001	-10.0846	2.16466e-72	2.68525e-71	cullin-associated and neddylation-dissociated 2 (putative)	Downregulated
BRCC3	79184	163.859	0	1.08548	0.001	-10.0841	5.39046e-49	3.95652e-48	BRCA1/BRCA2-containing complex, subunit 3	Downregulated
ANAPC11	51529	48.2347	0	1.08534	0.001	-10.0839	6.158e-15	1.6209e-14	anaphase promoting complex subunit 11	Downregulated
CABYR	26256	67.3672	0	1.07709	0.001	-10.0729	1.45377e-20	4.70156e-20	calcium binding tyrosine-(Y)-phosphorylation regulated	Downregulated
NUDCD2	134492	54.5736	0	1.07704	0.001	-10.0729	1.02922e-16	2.90047e-16	NudC domain containing 2	Downregulated
ANKFY1	51479	454.418	0	1.07574	0.001	-10.0711	3.55262e-135	1.27343e-133	ankyrin repeat and FYVE domain containing 1	Downregulated
CDH6	1004	482.449	0	1.06857	0.001	-10.0615	1.81222e-143	7.15828e-142	cadherin 6, type 2, K-cadherin (fetal kidney)	Downregulated
NUS1	116150	270.281	0	1.06816	0.001	-10.0609	1.10421e-80	1.61699e-79	nuclear undecaprenyl pyrophosphate synthase 1 homolog (S. cerevisiae)	Downregulated
PIGR	5284	240.72	0	1.06608	0.001	-10.0581	8.46638e-72	1.03845e-70	polymeric immunoglobulin receptor	Downregulated
C7orf26	79034	105.76	0	1.06186	0.001	-10.0524	8.10234e-32	3.77836e-31	chromosome 7 open reading frame 26	Downregulated
UBP1	7342	211.995	0	1.05969	0.001	-10.0494	3.2824e-63	3.30663e-62	upstream binding protein 1 (LBP-1a)	Downregulated
COL5A2	1290	386.246	0	1.05856	0.001	-10.0479	4.88746e-115	1.3071e-113	collagen, type V, alpha 2	Downregulated
PRMT3	10196	141.741	0	1.05726	0.001	-10.0461	1.76617e-42	1.09152e-41	protein arginine methyltransferase 3	Downregulated
SVIP	258010	77.3807	0	1.05624	0.001	-10.0447	1.58835e-23	5.65125e-23	small VCP/p97-interacting protein	Downregulated
KCNK12	56660	79.6659	0	1.05402	0.001	-10.0417	4.06104e-24	1.47549e-23	potassium channel, two pore domain subfamily K, member 12	Downregulated
CALD1	800	233.304	0	1.05343	0.001	-10.0409	1.0018e-69	1.17592e-68	caldesmon 1	Downregulated
LSM6	11157	42.8823	0	1.0524	0.001	-10.0395	3.68442e-13	9.04015e-13	LSM6 homolog, U6 small nuclear RNA associated (S. cerevisiae)	Downregulated
ARG2	384	109.002	0	1.05151	0.001	-10.0382	5.29652e-33	2.55322e-32	arginase 2	Downregulated
COQ10B	80219	109.316	0	1.05026	0.001	-10.0365	5.29652e-33	2.55014e-32	coenzyme Q10 homolog B (S. cerevisiae)	Downregulated
ZNF185	7739	179.066	0	1.05002	0.001	-10.0362	9.84346e-54	8.10701e-53	zinc finger protein 185 (LIM domain)	Downregulated
ATP6V1B2	526	168.087	0	1.0486	0.001	-10.0342	1.78177e-50	1.36017e-49	ATPase, H+ transporting, lysosomal 56/58kDa, V1 subunit B2	Downregulated
LDOC1L	84247	295.304	0	1.04812	0.001	-10.0336	4.3569e-88	7.60431e-87	leucine zipper, down-regulated in cancer 1-like	Downregulated
EED	8726	110.793	0	1.04798	0.001	-10.0334	2.67816e-33	1.3057e-32	embryonic ectoderm development	Downregulated
NUP37	79023	66.9324	0	1.04716	0.001	-10.0323	2.8751e-20	9.20891e-20	nucleoporin 37kDa	Downregulated
THNSL2	55258	108.506	0	1.0446	0.001	-10.0287	1.04748e-32	5.00324e-32	threonine synthase-like 2 (S. cerevisiae)	Downregulated
IFI6	2537	45.1397	0	1.04423	0.001	-10.0282	4.76326e-14	1.20771e-13	interferon, alpha-inducible protein 6	Downregulated
GPRC5C	55890	100.17	0	1.04334	0.001	-10.027	2.45124e-30	1.08654e-29	G protein-coupled receptor, class C, group 5, member C	Downregulated
FGD5-AS1	100505641	208.183	0	1.04125	0.001	-10.0241	2.53896e-62	2.5155e-61	FGD5 antisense RNA 1	Downregulated
GRHPR	9380	66.701	0	1.03754	0.001	-10.019	2.8751e-20	9.19909e-20	glyoxylate reductase/hydroxypyruvate reductase	Downregulated
FKBP1B	2281	52.1519	0	1.03572	0.001	-10.0164	4.0255e-16	1.10412e-15	FK506 binding protein 1B, 12.6 kDa	Downregulated
GRPEL2	134266	223.231	0	1.03458	0.001	-10.0148	9.1692e-67	1.0046e-65	GrpE-like 2, mitochondrial (E. coli)	Downregulated
TERF2IP	54386	118.919	0	1.03398	0.001	-10.014	1.14445e-35	5.94916e-35	telomeric repeat binding factor 2, interacting protein	Downregulated
DMWD	1762	179.54	0	1.0336	0.001	-10.0135	9.84346e-54	8.10146e-53	dystrophia myotonica, WD repeat containing	Downregulated
MLLT6	4302	407.178	0	1.03093	0.001	-10.0097	2.95004e-121	8.66114e-120	myeloid/lymphoid or mixed-lineage leukemia (trithorax homolog, Drosophila); translocated to, 6	Downregulated
CHPF2	54480	147.444	0	1.02967	0.001	-10.008	2.95192e-44	1.91293e-43	chondroitin polymerizing factor 2	Downregulated
ATXN2	6311	254.832	0	1.02834	0.001	-10.0061	6.04686e-76	8.14935e-75	ataxin 2	Downregulated
TCEAL4	79921	68.9802	0	1.02744	0.001	-10.0048	7.35092e-21	2.39473e-20	transcription elongation factor A (SII)-like 4	Downregulated
PHTF1	10745	174.87	0	1.02668	0.001	-10.0038	2.97798e-52	2.38397e-51	putative homeodomain transcription factor 1	Downregulated
EMG1	10436	57.1157	0	1.02571	0.001	-10.0024	1.33059e-17	3.86497e-17	EMG1 N1-specific pseudouridine methyltransferase	Downregulated
AMBRA1	55626	286.773	0	1.02552	0.001	-10.0021	2.01638e-85	3.30323e-84	autophagy/beclin-1 regulator 1	Downregulated
TMEM189	387521	122.809	0	1.02545	0.001	-10.002	7.4813e-37	4.00515e-36	transmembrane protein 189	Downregulated
RPS6KB1	6198	233.381	0	1.02472	0.001	-10.001	1.0018e-69	1.17477e-68	ribosomal protein S6 kinase, 70kDa, polypeptide 1	Downregulated
POLR3A	11128	358.556	0	1.02385	0.001	-9.99979	9.5812e-107	2.2873e-105	polymerase (RNA) III (DNA directed) polypeptide A, 155kDa	Downregulated
NMT1	4836	264.726	0	1.02378	0.001	-9.99969	6.60664e-79	9.34423e-78	N-myristoyltransferase 1	Downregulated
ATXN7	6314	385.514	0	1.02262	0.001	-9.99805	9.66578e-115	2.57354e-113	ataxin 7	Downregulated
TATDN1	83940	55.3853	0	1.01976	0.001	-9.99401	5.20422e-17	1.48156e-16	TatD DNase domain containing 1	Downregulated
SPRY2	10253	113.232	0	1.01722	0.001	-9.99042	3.46236e-34	1.7273e-33	sprouty homolog 2 (Drosophila)	Downregulated
RPL39	6170	22.6524	0	1.017	0.001	-9.9901	3.0865e-07	5.66448e-07	ribosomal protein L39	Downregulated
OSGIN1	29948	104.157	0	1.01668	0.001	-9.98965	1.60238e-31	7.41478e-31	oxidative stress induced growth inhibitor 1	Downregulated
KISS1R	84634	87.3831	0	1.01382	0.001	-9.98559	1.7354e-26	6.82339e-26	KISS1 receptor	Downregulated
ERCC6L	54821	225.093	0	1.0137	0.001	-9.98542	2.34434e-67	2.59455e-66	excision repair cross-complementation group 6-like	Downregulated
BLM	641	232.512	0	1.01233	0.001	-9.98346	1.98124e-69	2.30307e-68	Bloom syndrome, RecQ helicase-like	Downregulated
URM1	81605	140.41	0	1.01034	0.001	-9.98063	3.49292e-42	2.14213e-41	ubiquitin related modifier 1	Downregulated
ZNF346	23567	163.621	0	1.00911	0.001	-9.97887	5.39046e-49	3.96136e-48	zinc finger protein 346	Downregulated
FAM3C	10447	134.578	0	1.00581	0.001	-9.97414	2.08986e-40	1.22894e-39	family with sequence similarity 3, member C	Downregulated
ERAL1	26284	97.5794	0	1.0053	0.001	-9.97341	1.89605e-29	8.20459e-29	Era-like 12S mitochondrial rRNA chaperone 1	Downregulated
PRKACB	5567	224.699	0	1.00476	0.001	-9.97264	4.63636e-67	5.0983e-66	protein kinase, cAMP-dependent, catalytic, beta	Downregulated
SLC7A11	23657	510.468	0	1.00419	0.001	-9.97182	9.2443e-152	4.09615e-150	solute carrier family 7 (anionic amino acid transporter light chain, xc- system), member 11	Downregulated
ADCY1	107	160.958	0	1.00333	0.001	-9.97058	4.16956e-48	2.99809e-47	adenylate cyclase 1 (brain)	Downregulated
COG5	10466	253.599	0	1.00098	0.001	-9.9672	1.19587e-75	1.59911e-74	component of oligomeric golgi complex 5	Downregulated
MRPS30	10884	88.1033	0	1.00013	0.001	-9.96597	8.77492e-27	3.47295e-26	mitochondrial ribosomal protein S30	Downregulated
ZCCHC6	79670	262.356	0	0.999925	0.001	-9.96568	2.58398e-78	3.62059e-77	zinc finger, CCHC domain containing 6	Downregulated
ATPAF1	64756	85.86	0	0.999209	0.001	-9.96464	6.78748e-26	2.61399e-25	ATP synthase mitochondrial F1 complex assembly factor 1	Downregulated
RNFT1	51136	106.142	0	0.998495	0.001	-9.96361	4.0969e-32	1.92924e-31	ring finger protein, transmembrane 1	Downregulated
PTPRN	5798	194.563	0	0.997622	0.001	-9.96235	3.55488e-58	3.2168e-57	protein tyrosine phosphatase, receptor type, N	Downregulated
WFDC3	140686	51.6823	0	0.996112	0.001	-9.96016	7.96114e-16	2.16431e-15	WAP four-disulfide core domain 3	Downregulated
NEK11	79858	109.839	0	0.995707	0.001	-9.95958	5.29652e-33	2.55732e-32	NIMA-related kinase 11	Downregulated
RFX7	64864	377.415	0	0.995065	0.001	-9.95865	2.26192e-112	5.7667e-111	regulatory factor X, 7	Downregulated
KLHDC4	54758	91.8365	0	0.992551	0.001	-9.955	1.13443e-27	4.62242e-27	kelch domain containing 4	Downregulated
CTBP2	1488	177.219	0	0.992533	0.001	-9.95497	3.84996e-53	3.13214e-52	C-terminal binding protein 2	Downregulated
TIPARP	25976	212.159	0	0.99156	0.001	-9.95356	1.65972e-63	1.68612e-62	TCDD-inducible poly(ADP-ribose) polymerase	Downregulated
ZNF572	137209	170.455	0	0.990937	0.001	-9.95265	4.55556e-51	3.5338e-50	zinc finger protein 572	Downregulated
STK10	6793	314.815	0	0.990453	0.001	-9.95194	1.02857e-93	1.96049e-92	serine/threonine kinase 10	Downregulated
CD47	961	275.546	0	0.990422	0.001	-9.9519	3.64986e-82	5.54077e-81	CD47 molecule	Downregulated
C7orf43	55262	134.214	0	0.990201	0.001	-9.95158	2.08986e-40	1.23015e-39	chromosome 7 open reading frame 43	Downregulated
WASH7P	653635	92.3966	0	0.989573	0.001	-9.95066	5.7362e-28	2.3573e-27	WAS protein family homolog 7 pseudogene	Downregulated
NT5C3B	115024	73.7512	0	0.988887	0.001	-9.94966	2.42978e-22	8.33147e-22	5'-nucleotidase, cytosolic IIIB	Downregulated
SIGMAR1	10280	77.9153	0	0.988742	0.001	-9.94945	1.58835e-23	5.64122e-23	sigma non-opioid intracellular receptor 1	Downregulated
TLK1	9874	268.964	0	0.988462	0.001	-9.94904	4.31878e-80	6.23316e-79	tousled-like kinase 1	Downregulated
GALNT7	51809	225.485	0	0.988443	0.001	-9.94901	2.34434e-67	2.60174e-66	polypeptide N-acetylgalactosaminyltransferase 7	Downregulated
CPSF6	11052	344.919	0	0.988185	0.001	-9.94864	1.34149e-102	2.98862e-101	cleavage and polyadenylation specific factor 6, 68kDa	Downregulated
-	101926941	29.926	0	0.987772	0.001	-9.94803	2.60846e-09	5.32875e-09	uncharacterized LOC101926941	Downregulated
ACAT1	38	110.855	0	0.985117	0.001	-9.94415	2.67816e-33	1.30464e-32	acetyl-CoA acetyltransferase 1	Downregulated
DBI	1622	32.0273	0	0.983457	0.001	-9.94172	3.37224e-10	7.1734e-10	diazepam binding inhibitor (GABA receptor modulator, acyl-CoA binding protein)	Downregulated
TTC29	83894	93.2565	0	0.983138	0.001	-9.94125	2.90048e-28	1.20682e-27	tetratricopeptide repeat domain 29	Downregulated
PUS10	150962	197.208	0	0.982469	0.001	-9.94027	4.59578e-59	4.25819e-58	pseudouridylate synthase 10	Downregulated
RNF215	200312	98.7299	0	0.981914	0.001	-9.93945	9.58726e-30	4.19853e-29	ring finger protein 215	Downregulated
ATOX1	475	24.8596	0	0.979194	0.001	-9.93545	7.89146e-08	1.49606e-07	antioxidant 1 copper chaperone	Downregulated
IDUA	3425	112.825	0	0.972958	0.001	-9.92623	6.8474e-34	3.38508e-33	iduronidase, alpha-L-	Downregulated
DARS	1615	158.749	0	0.971472	0.001	-9.92403	1.6308e-47	1.14854e-46	aspartyl-tRNA synthetase	Downregulated
TPT1-AS1	100190939	80.1942	0	0.971462	0.001	-9.92401	2.05344e-24	7.54289e-24	TPT1 antisense RNA 1	Downregulated
COG8	84342	128.347	0	0.970725	0.001	-9.92292	1.2504e-38	7.00315e-38	component of oligomeric golgi complex 8	Downregulated
RGL2	5863	161.508	0	0.96936	0.001	-9.92089	2.10832e-48	1.5251e-47	ral guanine nucleotide dissociation stimulator-like 2	Downregulated
NT5DC2	64943	92.7776	0	0.96847	0.001	-9.91956	5.7362e-28	2.35167e-27	5'-nucleotidase domain containing 2	Downregulated
RELA	5970	131.287	0	0.96823	0.001	-9.91921	1.61653e-39	9.29657e-39	v-rel avian reticuloendotheliosis viral oncogene homolog A	Downregulated
TRMT2B	79979	158.754	0	0.968063	0.001	-9.91896	1.6308e-47	1.14787e-46	tRNA methyltransferase 2 homolog B (S. cerevisiae)	Downregulated
TCF20	6942	373.395	0	0.967766	0.001	-9.91851	3.46016e-111	8.67424e-110	transcription factor 20 (AR1)	Downregulated
LRCH2	57631	248.485	0	0.966105	0.001	-9.91604	3.61792e-74	4.68146e-73	leucine-rich repeats and calponin homology (CH) domain containing 2	Downregulated
GULP1	51454	162.342	0	0.965397	0.001	-9.91498	1.06606e-48	7.7819e-48	GULP, engulfment adaptor PTB domain containing 1	Downregulated
GAS2L1	10634	92.617	0	0.965198	0.001	-9.91468	5.7362e-28	2.35811e-27	growth arrest-specific 2 like 1	Downregulated
C12orf65	91574	80.8873	0	0.963229	0.001	-9.91174	2.05344e-24	7.5452e-24	chromosome 12 open reading frame 65	Downregulated
MED4	29079	115.407	0	0.963217	0.001	-9.91172	8.8524e-35	4.50422e-34	mediator complex subunit 4	Downregulated
BRPF1	7862	238.507	0	0.962874	0.001	-9.9112	3.31138e-71	4.00434e-70	bromodomain and PHD finger containing, 1	Downregulated
UBE2E4P	286480	57.9997	0	0.962231	0.001	-9.91024	1.33059e-17	3.86965e-17	ubiquitin-conjugating enzyme E2E 4 pseudogene	Downregulated
KIFC2	90990	166.028	0	0.961658	0.001	-9.90938	6.96884e-50	5.21382e-49	kinesin family member C2	Downregulated
BTRC	8945	306.57	0	0.959256	0.001	-9.90577	2.407e-91	4.43982e-90	beta-transducin repeat containing E3 ubiquitin protein ligase	Downregulated
PAXIP1	22976	187.56	0	0.958856	0.001	-9.90517	4.20638e-56	3.6234e-55	PAX interacting (with transcription-activation domain) protein 1	Downregulated
LSM12	124801	125.92	0	0.958106	0.001	-9.90404	9.6719e-38	5.28871e-37	LSM12 homolog (S. cerevisiae)	Downregulated
MARS2	92935	155.722	0	0.956343	0.001	-9.90138	1.26144e-46	8.71538e-46	methionyl-tRNA synthetase 2, mitochondrial	Downregulated
TOMM20	9804	170.533	0	0.953077	0.001	-9.89645	4.55556e-51	3.52924e-50	translocase of outer mitochondrial membrane 20 homolog (yeast)	Downregulated
KANSL3	55683	262.406	0	0.951862	0.001	-9.89461	2.58398e-78	3.62482e-77	KAT8 regulatory NSL complex subunit 3	Downregulated
SRA1	10011	62.885	0	0.950858	0.001	-9.89309	4.39816e-19	1.34934e-18	steroid receptor RNA activator 1	Downregulated
CBWD5	220869	36.8529	0	0.948666	0.001	-9.88976	2.20444e-11	4.95617e-11	COBW domain containing 5	Downregulated
RNF220	55182	150.439	0	0.947548	0.001	-9.88806	3.81628e-45	2.5544e-44	ring finger protein 220	Downregulated
PTP4A1	7803	253.375	0	0.945718	0.001	-9.88527	1.19587e-75	1.59556e-74	protein tyrosine phosphatase type IVA, member 1	Downregulated
CRB3	92359	37.9263	0	0.945467	0.001	-9.88488	1.11466e-11	2.53934e-11	crumbs family member 3	Downregulated
ARHGAP33	115703	195.457	0	0.943716	0.001	-9.88221	1.7975e-58	1.63642e-57	Rho GTPase activating protein 33	Downregulated
PRDX3	10935	54.2486	0	0.941208	0.001	-9.87837	1.02922e-16	2.90798e-16	peroxiredoxin 3	Downregulated
MRS2	57380	88.5383	0	0.938699	0.001	-9.87452	8.77492e-27	3.47983e-26	MRS2 magnesium transporter	Downregulated
LOC113230	113230	64.9946	0	0.938563	0.001	-9.87431	1.1245e-19	3.52284e-19	uncharacterized protein LOC113230	Downregulated
FAM107A	11170	157.035	0	0.937664	0.001	-9.87293	3.22518e-47	2.25425e-46	family with sequence similarity 107, member A	Downregulated
ALOX15B	247	123.108	0	0.936339	0.001	-9.87089	3.78288e-37	2.0434e-36	arachidonate 15-lipoxygenase, type B	Downregulated
POGLUT1	56983	174.625	0	0.935916	0.001	-9.87024	2.97798e-52	2.37763e-51	protein O-glucosyltransferase 1	Downregulated
EXOSC5	56915	48.7448	0	0.933796	0.001	-9.86696	6.158e-15	1.61983e-14	exosome component 5	Downregulated
ISOC2	79763	54.4563	0	0.933696	0.001	-9.86681	1.02922e-16	2.89707e-16	isochorismatase domain containing 2	Downregulated
2003-08-01	192669	166.437	0	0.929635	0.001	-9.86052	6.96884e-50	5.21707e-49	argonaute RISC catalytic component 3	Downregulated
DHFRL1	200895	191.701	0	0.927238	0.001	-9.8568	2.74972e-57	2.4368e-56	dihydrofolate reductase-like 1	Downregulated
ANAPC4	29945	131.277	0	0.926671	0.001	-9.85591	1.61653e-39	9.26994e-39	anaphase promoting complex subunit 4	Downregulated
INSIG1	3638	146.818	0	0.92628	0.001	-9.8553	5.83794e-44	3.75077e-43	insulin induced gene 1	Downregulated
PRICKLE3	4007	96.268	0	0.924431	0.001	-9.85242	3.74976e-29	1.6041e-28	prickle homolog 3 (Drosophila)	Downregulated
MON2	23041	500.314	0	0.922531	0.001	-9.84945	8.46104e-149	3.55245e-147	MON2 homolog (S. cerevisiae)	Downregulated
KAT2A	2648	151.259	0	0.92147	0.001	-9.84779	1.92968e-45	1.29958e-44	K(lysine) acetyltransferase 2A	Downregulated
PEX6	5190	169.946	0	0.920738	0.001	-9.84665	9.00942e-51	6.92163e-50	peroxisomal biogenesis factor 6	Downregulated
PALM2-AKAP2	445815	362.665	0	0.91884	0.001	-9.84367	6.26326e-108	1.52864e-106	PALM2-AKAP2 readthrough	Downregulated
MON1B	22879	161.298	0	0.917432	0.001	-9.84146	2.10832e-48	1.52694e-47	MON1 secretory trafficking family member B	Downregulated
IFT57	55081	155.025	0	0.916131	0.001	-9.83941	1.26144e-46	8.73548e-46	intraflagellar transport 57	Downregulated
ELP2	55250	117.049	0	0.914862	0.001	-9.83741	2.26334e-35	1.17046e-34	elongator acetyltransferase complex subunit 2	Downregulated
CERK	64781	213.755	0	0.914594	0.001	-9.83699	8.3923e-64	8.562e-63	ceramide kinase	Downregulated
MRPL11	65003	69.3972	0	0.91433	0.001	-9.83657	3.71696e-21	1.22484e-20	mitochondrial ribosomal protein L11	Downregulated
DUS3L	56931	66.7798	0	0.914174	0.001	-9.83632	2.8751e-20	9.20155e-20	dihydrouridine synthase 3-like (S. cerevisiae)	Downregulated
CLASRP	11129	107.659	0	0.913442	0.001	-9.83517	2.07158e-32	9.82446e-32	CLK4-associating serine/arginine rich protein	Downregulated
FIGNL1	63979	156.814	0	0.911355	0.001	-9.83187	6.37838e-47	4.43238e-46	fidgetin-like 1	Downregulated
SYNPO	11346	236.509	0	0.910008	0.001	-9.82974	1.29514e-70	1.54593e-69	synaptopodin	Downregulated
MXD4	10608	180.074	0	0.908335	0.001	-9.82708	4.97728e-54	4.12472e-53	MAX dimerization protein 4	Downregulated
FBXO41	150726	331.016	0	0.906017	0.001	-9.82339	9.49734e-99	2.01491e-97	F-box protein 41	Downregulated
GGT5	2687	108.186	0	0.904546	0.001	-9.82105	1.04748e-32	5.00523e-32	gamma-glutamyltransferase 5	Downregulated
TMEM205	374882	37.9821	0	0.904035	0.001	-9.82023	1.11466e-11	2.54079e-11	transmembrane protein 205	Downregulated
C6orf62	81688	118.254	0	0.903047	0.001	-9.81866	1.14445e-35	5.95173e-35	chromosome 6 open reading frame 62	Downregulated
SNX29	92017	388.773	0	0.902	0.001	-9.81698	1.2496e-115	3.39485e-114	sorting nexin 29	Downregulated
HABP4	22927	126.599	0	0.900361	0.001	-9.81436	4.89054e-38	2.70251e-37	hyaluronan binding protein 4	Downregulated
TRAF2	7186	108.258	0	0.899197	0.001	-9.81249	1.04748e-32	5.01121e-32	TNF receptor-associated factor 2	Downregulated
LARP4	113251	290.712	0	0.898305	0.001	-9.81106	1.31811e-86	2.2199e-85	La ribonucleoprotein domain family, member 4	Downregulated
DNAJA3	9093	131.001	0	0.89828	0.001	-9.81102	1.61653e-39	9.28768e-39	DnaJ (Hsp40) homolog, subfamily A, member 3	Downregulated
KRT10	3858	101.665	0	0.897975	0.001	-9.81053	1.23945e-30	5.54521e-30	keratin 10, type I	Downregulated
LOC100506325	100506325	102.357	0	0.895737	0.001	-9.80693	6.26722e-31	2.82601e-30	SP2 antisense RNA 1	Downregulated
ZNF692	55657	82.3578	0	0.895214	0.001	-9.80609	5.25016e-25	1.96215e-24	zinc finger protein 692	Downregulated
MTTP	4547	185.907	0	0.895097	0.001	-9.8059	1.6452e-55	1.40011e-54	microsomal triglyceride transfer protein	Downregulated
LCOR	84458	367.261	0	0.894826	0.001	-9.80546	2.07026e-109	5.12571e-108	ligand dependent nuclear receptor corepressor	Downregulated
NAA35	60560	124.677	0	0.894752	0.001	-9.80534	1.91279e-37	1.03837e-36	N(alpha)-acetyltransferase 35, NatC auxiliary subunit	Downregulated
PIM1	5292	129.103	0	0.894656	0.001	-9.80519	6.32256e-39	3.57613e-38	Pim-1 proto-oncogene, serine/threonine kinase	Downregulated
DNAJA4	55466	135.635	0	0.894139	0.001	-9.80436	1.05673e-40	6.29112e-40	DnaJ (Hsp40) homolog, subfamily A, member 4	Downregulated
UBAC2	337867	122.082	0	0.892006	0.001	-9.80091	7.4813e-37	4.00336e-36	UBA domain containing 2	Downregulated
DAB2IP	153090	192.631	0	0.889115	0.001	-9.79623	1.39038e-57	1.23672e-56	DAB2 interacting protein	Downregulated
AVIL	10677	147.59	0	0.888827	0.001	-9.79576	2.95192e-44	1.91397e-43	advillin	Downregulated
LEMD2	221496	137.912	0	0.888741	0.001	-9.79562	2.7018e-41	1.62868e-40	LEM domain containing 2	Downregulated
EXTL3	2137	83.8221	0	0.888697	0.001	-9.79555	2.65472e-25	1.00276e-24	exostosin-like glycosyltransferase 3	Downregulated
CPSF3	51692	111.428	0	0.885536	0.001	-9.79041	1.35419e-33	6.66714e-33	cleavage and polyadenylation specific factor 3, 73kDa	Downregulated
SLC35A2	7355	79.3991	0	0.885405	0.001	-9.79019	4.06104e-24	1.47415e-23	solute carrier family 35 (UDP-galactose transporter), member A2	Downregulated
CGGBP1	8545	209.708	0	0.885086	0.001	-9.78967	1.28381e-62	1.27616e-61	CGG triplet repeat binding protein 1	Downregulated
ATG3	64422	72.5684	0	0.884172	0.001	-9.78818	4.80532e-22	1.63139e-21	autophagy related 3	Downregulated
INTS3	65123	210.887	0	0.88376	0.001	-9.78751	6.4915e-63	6.50667e-62	integrator complex subunit 3	Downregulated
ARHGEF7	8874	230.338	0	0.88358	0.001	-9.78722	7.74902e-69	8.87037e-68	Rho guanine nucleotide exchange factor (GEF) 7	Downregulated
ARMC5	79798	163.494	0	0.881998	0.001	-9.78463	5.39046e-49	3.96622e-48	armadillo repeat containing 5	Downregulated
PPIH	10465	37.016	0	0.881041	0.001	-9.78307	1.11466e-11	2.54031e-11	peptidylprolyl isomerase H (cyclophilin H)	Downregulated
-	101929144	85.0622	0	0.878254	0.001	-9.77849	6.78748e-26	2.61315e-25	uncharacterized LOC101929144	Downregulated
TBC1D2B	23102	278.642	0	0.877231	0.001	-9.77681	4.71858e-83	7.33947e-82	TBC1 domain family, member 2B	Downregulated
TAP1	6890	102.471	0	0.875696	0.001	-9.77429	6.26722e-31	2.8324e-30	transporter 1, ATP-binding cassette, sub-family B (MDR/TAP)	Downregulated
APIP	51074	58.527	0	0.874493	0.001	-9.7723	6.72808e-18	1.98698e-17	APAF1 interacting protein	Downregulated
ZNF337	26152	197.607	0	0.873718	0.001	-9.77102	4.59578e-59	4.26148e-58	zinc finger protein 337	Downregulated
NSF	4905	181.856	0	0.873376	0.001	-9.77046	2.51674e-54	2.09723e-53	N-ethylmaleimide-sensitive factor	Downregulated
FBXL12	54850	85.4691	0	0.871062	0.001	-9.76663	6.78748e-26	2.6073e-25	F-box and leucine-rich repeat protein 12	Downregulated
PPARG	5468	82.6973	0	0.869956	0.001	-9.7648	5.25016e-25	1.96093e-24	peroxisome proliferator-activated receptor gamma	Downregulated
AP2S1	1175	38.2674	0	0.869327	0.001	-9.76376	5.63624e-12	1.2963e-11	adaptor-related protein complex 2, sigma 1 subunit	Downregulated
LUC7L	55692	94.7384	0	0.869212	0.001	-9.76356	1.46661e-28	6.16849e-28	LUC7-like (S. cerevisiae)	Downregulated
EPSTI1	94240	142.868	0	0.86784	0.001	-9.76129	8.93056e-43	5.55638e-42	epithelial stromal interaction 1 (breast)	Downregulated
TCF12	6938	215.974	0	0.867471	0.001	-9.76067	2.1457e-64	2.22501e-63	transcription factor 12	Downregulated
CNTLN	54875	225.105	0	0.867017	0.001	-9.75992	2.34434e-67	2.59934e-66	centlein, centrosomal protein	Downregulated
PLTP	5360	78.1584	0	0.865962	0.001	-9.75816	8.03142e-24	2.88574e-23	phospholipid transfer protein	Downregulated
NPHP3	27031	246.579	0	0.864972	0.001	-9.75651	1.41504e-73	1.80189e-72	nephronophthisis 3 (adolescent)	Downregulated
TMEM243	79161	48.6326	0	0.864351	0.001	-9.75547	6.158e-15	1.61558e-14	transmembrane protein 243, mitochondrial	Downregulated
OGFOD2	79676	83.3505	0	0.864082	0.001	-9.75502	2.65472e-25	1.00371e-24	2-oxoglutarate and iron-dependent oxygenase domain containing 2	Downregulated
RNF216	54476	258.831	0	0.863503	0.001	-9.75406	3.95284e-77	5.41846e-76	ring finger protein 216	Downregulated
CDK2AP2	10263	49.2666	0	0.862671	0.001	-9.75267	3.11376e-15	8.27213e-15	cyclin-dependent kinase 2 associated protein 2	Downregulated
NOA1	84273	104.26	0	0.862584	0.001	-9.75252	1.60238e-31	7.39483e-31	nitric oxide associated 1	Downregulated
ELP3	55140	137.144	0	0.861807	0.001	-9.75122	2.7018e-41	1.62949e-40	elongator acetyltransferase complex subunit 3	Downregulated
RANBP9	10048	141.633	0	0.861444	0.001	-9.75061	1.76617e-42	1.09321e-41	RAN binding protein 9	Downregulated
GOLGA1	2800	221.652	0	0.86019	0.001	-9.74851	3.58626e-66	3.86223e-65	golgin A1	Downregulated
ERCC6L2	375748	346.25	0	0.859924	0.001	-9.74807	3.42988e-103	7.81518e-102	excision repair cross-complementation group 6-like 2	Downregulated
CAPG	822	58.8355	0	0.859448	0.001	-9.74727	6.72808e-18	1.98308e-17	capping protein (actin filament), gelsolin-like	Downregulated
ABCD3	5825	163.238	0	0.85933	0.001	-9.74707	5.39046e-49	3.95894e-48	ATP-binding cassette, sub-family D (ALD), member 3	Downregulated
ASCC2	84164	127.841	0	0.857981	0.001	-9.7448	2.47288e-38	1.37283e-37	activating signal cointegrator 1 complex subunit 2	Downregulated
KIFC1	3833	122.17	0	0.856009	0.001	-9.74148	7.4813e-37	3.99802e-36	kinesin family member C1	Downregulated
TARSL2	123283	148.214	0	0.85534	0.001	-9.74035	1.49262e-44	9.77284e-44	threonyl-tRNA synthetase-like 2	Downregulated
NR1H3	10062	77.8592	0	0.852182	0.001	-9.73502	1.58835e-23	5.65292e-23	nuclear receptor subfamily 1, group H, member 3	Downregulated
RPS6KC1	26750	183.206	0	0.850535	0.001	-9.73223	6.4347e-55	5.42231e-54	ribosomal protein S6 kinase, 52kDa, polypeptide 1	Downregulated
C11orf35	256329	92.9331	0	0.846093	0.001	-9.72467	5.7362e-28	2.35891e-27	lamin tail domain containing 2	Downregulated
AUNIP	79000	96.4814	0	0.845879	0.001	-9.72431	3.74976e-29	1.60524e-28	aurora kinase A and ninein interacting protein	Downregulated
ABCC10	89845	224.73	0	0.844624	0.001	-9.72217	4.63636e-67	5.10297e-66	ATP-binding cassette, sub-family C (CFTR/MRP), member 10	Downregulated
SEC11C	90701	34.5838	0	0.844365	0.001	-9.72172	8.622e-11	1.8917e-10	SEC11 homolog C (S. cerevisiae)	Downregulated
BMS1P4	729096	86.5463	0	0.843909	0.001	-9.72094	3.43204e-26	1.33113e-25	BMS1 pseudogene 4	Downregulated
COMMD6	170622	74.5183	0	0.84209	0.001	-9.71783	1.2286e-22	4.25406e-22	COMM domain containing 6	Downregulated
TMEM201	199953	172.816	0	0.84154	0.001	-9.71689	1.16475e-51	9.15333e-51	transmembrane protein 201	Downregulated
SCNN1A	6337	142.087	0	0.841508	0.001	-9.71683	8.93056e-43	5.56215e-42	sodium channel, non voltage gated 1 alpha subunit	Downregulated
HSBP1L1	440498	33.1486	0	0.838501	0.001	-9.71167	1.70515e-10	3.68529e-10	heat shock factor binding protein 1-like 1	Downregulated
E4F1	1877	93.477	0	0.836177	0.001	-9.70766	2.90048e-28	1.20307e-27	E4F transcription factor 1	Downregulated
TRIM23	373	105.094	0	0.835553	0.001	-9.70659	8.10234e-32	3.77543e-31	tripartite motif containing 23	Downregulated
PSMA1	5682	55.7178	0	0.835153	0.001	-9.7059	5.20422e-17	1.48544e-16	proteasome (prosome, macropain) subunit, alpha type, 1	Downregulated
RSPO3	84870	201.248	0	0.835057	0.001	-9.70573	3.00428e-60	2.85859e-59	R-spondin 3	Downregulated
GCLC	2729	167.627	0	0.83444	0.001	-9.70466	3.52376e-50	2.67298e-49	glutamate-cysteine ligase, catalytic subunit	Downregulated
PPP1R12A	4659	234.158	0	0.833905	0.001	-9.70374	5.06556e-70	5.96931e-69	protein phosphatase 1, regulatory subunit 12A	Downregulated
DIMT1	27292	67.6102	0	0.831785	0.001	-9.70007	1.45377e-20	4.70917e-20	DIM1 dimethyladenosine transferase 1 homolog (S. cerevisiae)	Downregulated
MITF	4286	187.333	0	0.831397	0.001	-9.69939	4.20638e-56	3.6208e-55	microphthalmia-associated transcription factor	Downregulated
IGSF9B	22997	207.82	0	0.830494	0.001	-9.69783	5.02122e-62	4.9422e-61	immunoglobulin superfamily, member 9B	Downregulated
POLR2J	5439	42.6587	0	0.82979	0.001	-9.6966	3.68442e-13	9.00336e-13	polymerase (RNA) II (DNA directed) polypeptide J, 13.3kDa	Downregulated
OCLM	10896	37.9538	0	0.829385	0.001	-9.6959	1.11466e-11	2.53694e-11	oculomedin	Downregulated
CHID1	66005	148.837	0	0.828891	0.001	-9.69504	1.49262e-44	9.77817e-44	chitinase domain containing 1	Downregulated
SNX13	23161	277.214	0	0.826585	0.001	-9.69102	9.33182e-83	1.43847e-81	sorting nexin 13	Downregulated
NFAT5	10725	293.828	0	0.825548	0.001	-9.68921	1.70407e-87	2.9274e-86	nuclear factor of activated T-cells 5, tonicity-responsive	Downregulated
CPEB4	80315	337.207	0	0.824143	0.001	-9.68675	1.58735e-100	3.44682e-99	cytoplasmic polyadenylation element binding protein 4	Downregulated
NFKB2	4791	135.191	0	0.823848	0.001	-9.68623	1.05673e-40	6.29424e-40	nuclear factor of kappa light polypeptide gene enhancer in B-cells 2 (p49/p100)	Downregulated
PBX3	5090	110.176	0	0.822134	0.001	-9.68323	2.67816e-33	1.30623e-32	pre-B-cell leukemia homeobox 3	Downregulated
PLEKHH2	130271	301.11	0	0.820252	0.001	-9.67992	7.28198e-90	1.31294e-88	pleckstrin homology domain containing, family H (with MyTH4 domain) member 2	Downregulated
MAP3K1	4214	324.86	0	0.820098	0.001	-9.67965	1.12379e-96	2.27948e-95	mitogen-activated protein kinase kinase kinase 1, E3 ubiquitin protein ligase	Downregulated
ARHGAP5-AS1	84837	54.6808	0	0.819611	0.001	-9.6788	1.02922e-16	2.90661e-16	ARHGAP5 antisense RNA 1 (head to head)	Downregulated
FAM175A	84142	121.843	0	0.819178	0.001	-9.67803	1.47956e-36	7.8613e-36	family with sequence similarity 175, member A	Downregulated
ATM	472	567.415	0	0.818759	0.001	-9.6773	1.21631e-168	6.82499e-167	ATM serine/threonine kinase	Downregulated
ADCK2	90956	101.508	0	0.815249	0.001	-9.6711	1.23945e-30	5.54108e-30	aarF domain containing kinase 2	Downregulated
ACAP2	23527	308.054	0	0.814005	0.001	-9.66889	6.1541e-92	1.14217e-90	ArfGAP with coiled-coil, ankyrin repeat and PH domains 2	Downregulated
GLDC	2731	163.344	0	0.813761	0.001	-9.66846	5.39046e-49	3.96379e-48	glycine dehydrogenase (decarboxylating)	Downregulated
GIT1	28964	160.097	0	0.812322	0.001	-9.66591	4.16956e-48	2.99988e-47	G protein-coupled receptor kinase interacting ArfGAP 1	Downregulated
-	101752334	53.4483	0	0.812059	0.001	-9.66544	2.03548e-16	5.67496e-16	poliovirus receptor related immunoglobulin domain containing 2, pseudogene	Downregulated
STK38	11329	155.401	0	0.811707	0.001	-9.66482	1.26144e-46	8.73045e-46	serine/threonine kinase 38	Downregulated
GOLM1	51280	131.6	0	0.810832	0.001	-9.66326	1.61653e-39	9.29212e-39	golgi membrane protein 1	Downregulated
KHDRBS1	10657	105.524	0	0.809748	0.001	-9.66133	8.10234e-32	3.78424e-31	KH domain containing, RNA binding, signal transduction associated 1	Downregulated
NAA15	80155	236.64	0	0.809717	0.001	-9.66127	1.29514e-70	1.54747e-69	N(alpha)-acetyltransferase 15, NatA auxiliary subunit	Downregulated
INO80D	54891	603.306	0	0.809568	0.001	-9.66101	2.65136e-179	1.66689e-177	INO80 complex subunit D	Downregulated
ZNF623	9831	169.794	0	0.807613	0.001	-9.65752	9.00942e-51	6.91721e-50	zinc finger protein 623	Downregulated
PCOLCE2	26577	86.3511	0	0.80592	0.001	-9.65449	3.43204e-26	1.33718e-25	procollagen C-endopeptidase enhancer 2	Downregulated
ATRNL1	26033	72.1963	0	0.805155	0.001	-9.65312	4.80532e-22	1.63047e-21	attractin-like 1	Downregulated
DPYD	1806	188.331	0	0.804721	0.001	-9.65234	2.12694e-56	1.85613e-55	dihydropyrimidine dehydrogenase	Downregulated
GAB1	2549	331.784	0	0.803941	0.001	-9.65095	9.49734e-99	2.01136e-97	GRB2-associated binding protein 1	Downregulated
ARFGAP1	55738	138.629	0	0.803694	0.001	-9.6505	1.36615e-41	8.29359e-41	ADP-ribosylation factor GTPase activating protein 1	Downregulated
POLR3D	661	81.8066	0	0.803482	0.001	-9.65012	1.03831e-24	3.85173e-24	polymerase (RNA) III (DNA directed) polypeptide D, 44kDa	Downregulated
HCP5	10866	107.116	0	0.802144	0.001	-9.64772	2.07158e-32	9.82058e-32	HLA complex P5 (non-protein coding)	Downregulated
RBBP8	5932	138.085	0	0.802015	0.001	-9.64749	1.36615e-41	8.29779e-41	retinoblastoma binding protein 8	Downregulated
HELLS	3070	128.907	0	0.80075	0.001	-9.64521	1.2504e-38	7.00642e-38	helicase, lymphoid-specific	Downregulated
SLC27A3	11000	101.73	0	0.798754	0.001	-9.64161	1.23945e-30	5.53902e-30	solute carrier family 27 (fatty acid transporter), member 3	Downregulated
SKIV2L2	23517	177.082	0	0.797863	0.001	-9.64	3.84996e-53	3.12578e-52	superkiller viralicidic activity 2-like 2 (S. cerevisiae)	Downregulated
TSTA3	7264	56.6684	0	0.797656	0.001	-9.63962	2.63148e-17	7.56495e-17	tissue specific transplantation antigen P35B	Downregulated
RIOK1	83732	104.289	0	0.797361	0.001	-9.63909	1.60238e-31	7.38348e-31	RIO kinase 1	Downregulated
UBL7	84993	56.1791	0	0.797058	0.001	-9.63854	2.63148e-17	7.57584e-17	ubiquitin-like 7	Downregulated
-	102288414	27.284	0	0.796494	0.001	-9.63752	1.02022e-08	2.02693e-08	chromosome 11 open reading frame 98	Downregulated
ERCC6	2074	377.123	0	0.796013	0.001	-9.63665	2.26192e-112	5.77896e-111	excision repair cross-complementation group 6	Downregulated
GPR75	10936	89.8326	0	0.794574	0.001	-9.63404	4.437e-27	1.77362e-26	G protein-coupled receptor 75	Downregulated
SNHG10	283596	55.4832	0	0.79395	0.001	-9.6329	5.20422e-17	1.48685e-16	small nucleolar RNA host gene 10	Downregulated
ZRANB2	9406	128.64	0	0.793883	0.001	-9.63278	1.2504e-38	7.00969e-38	zinc finger, RAN-binding domain containing 2	Downregulated
ST7-OT3	93655	42.1896	0	0.793771	0.001	-9.63258	3.68442e-13	9.0107e-13	ST7 overlapping transcript 3	Downregulated
CCSER2	54462	302.48	0	0.791967	0.001	-9.6293	3.68208e-90	6.66884e-89	coiled-coil serine-rich protein 2	Downregulated
KLF13	51621	199.469	0	0.790883	0.001	-9.62732	1.17503e-59	1.10233e-58	Kruppel-like factor 13	Downregulated
COQ9	57017	69.9076	0	0.787442	0.001	-9.62103	3.71696e-21	1.22451e-20	coenzyme Q9	Downregulated
FARSB	10056	102.223	0	0.786331	0.001	-9.61899	6.26722e-31	2.8292e-30	phenylalanyl-tRNA synthetase, beta subunit	Downregulated
MEF2D	4209	237.951	0	0.785224	0.001	-9.61696	6.54882e-71	7.88749e-70	myocyte enhancer factor 2D	Downregulated
SIRT1	23411	151.691	0	0.785195	0.001	-9.61691	1.92968e-45	1.30177e-44	sirtuin 1	Downregulated
SDF2	6388	51.4846	0	0.78348	0.001	-9.61375	7.96114e-16	2.16284e-15	stromal cell-derived factor 2	Downregulated
C5orf54	63920	117.382	0	0.783075	0.001	-9.61301	2.26334e-35	1.17097e-34	zinc finger, BED-type containing 8	Downregulated
EPAS1	2034	213.411	0	0.782524	0.001	-9.61199	8.3923e-64	8.56928e-63	endothelial PAS domain protein 1	Downregulated
TRIM2	23321	278.528	0	0.779157	0.001	-9.60577	4.71858e-83	7.34899e-82	tripartite motif containing 2	Downregulated
PNN	5411	147.564	0	0.778979	0.001	-9.60544	2.95192e-44	1.91604e-43	pinin, desmosome associated protein	Downregulated
OSR2	116039	73.0824	0	0.778755	0.001	-9.60503	2.42978e-22	8.32671e-22	odd-skipped related transciption factor 2	Downregulated
INTS12	57117	65.3045	0	0.778644	0.001	-9.60482	5.686e-20	1.79962e-19	integrator complex subunit 12	Downregulated
ELOVL6	79071	130.319	0	0.778386	0.001	-9.60434	3.19696e-39	1.82284e-38	ELOVL fatty acid elongase 6	Downregulated
ABI3	51225	85.92	0	0.777387	0.001	-9.60249	6.78748e-26	2.6098e-25	ABI family, member 3	Downregulated
CEP57	9702	126.942	0	0.776577	0.001	-9.60099	4.89054e-38	2.705e-37	centrosomal protein 57kDa	Downregulated
TRAPPC12	51112	103.615	0	0.776238	0.001	-9.60036	3.16898e-31	1.44524e-30	trafficking protein particle complex 12	Downregulated
ZNF3	7551	95.8681	0	0.774056	0.001	-9.59629	7.41582e-29	3.14217e-28	zinc finger protein 3	Downregulated
FBXL3	26224	145.132	0	0.773471	0.001	-9.5952	1.15455e-43	7.33539e-43	F-box and leucine-rich repeat protein 3	Downregulated
PDZK1	5174	93.2438	0	0.77347	0.001	-9.5952	2.90048e-28	1.20432e-27	PDZ domain containing 1	Downregulated
CISD1	55847	85.6174	0	0.773172	0.001	-9.59465	6.78748e-26	2.61147e-25	CDGSH iron sulfur domain 1	Downregulated
SESTD1	91404	425.471	0	0.772795	0.001	-9.59394	1.37734e-126	4.34097e-125	SEC14 and spectrin domains 1	Downregulated
NUDCD3	23386	200.341	0	0.772263	0.001	-9.59295	5.94148e-60	5.61332e-59	NudC domain containing 3	Downregulated
ADNP	23394	244.057	0	0.771276	0.001	-9.5911	5.5345e-73	6.95898e-72	activity-dependent neuroprotector homeobox	Downregulated
NAA60	79903	106.86	0	0.77127	0.001	-9.59109	4.0969e-32	1.92622e-31	N(alpha)-acetyltransferase 60, NatF catalytic subunit	Downregulated
CPSF3L	54973	74.8249	0	0.767121	0.001	-9.58331	1.2286e-22	4.24549e-22	cleavage and polyadenylation specific factor 3-like	Downregulated
EXOSC7	23016	49.7593	0	0.767083	0.001	-9.58324	3.11376e-15	8.27762e-15	exosome component 7	Downregulated
C10orf88	80007	124.879	0	0.766926	0.001	-9.58294	1.91279e-37	1.04072e-36	chromosome 10 open reading frame 88	Downregulated
LRP5	4041	209.356	0	0.766767	0.001	-9.58264	1.28381e-62	1.27721e-61	low density lipoprotein receptor-related protein 5	Downregulated
ZNF83	55769	115.584	0	0.766757	0.001	-9.58263	8.8524e-35	4.48332e-34	zinc finger protein 83	Downregulated
ZNF142	7701	240.903	0	0.765317	0.001	-9.57991	8.46638e-72	1.03951e-70	zinc finger protein 142	Downregulated
ERCC2	2068	102.889	0	0.764148	0.001	-9.57771	6.26722e-31	2.82708e-30	excision repair cross-complementation group 2	Downregulated
ZC3H11A	9877	192.415	0	0.762978	0.001	-9.5755	1.39038e-57	1.23763e-56	zinc finger CCCH-type containing 11A	Downregulated
ELP4	26610	110.805	0	0.762832	0.001	-9.57522	2.67816e-33	1.30676e-32	elongator acetyltransferase complex subunit 4	Downregulated
EML2	24139	79.5833	0	0.762282	0.001	-9.57418	4.06104e-24	1.47862e-23	echinoderm microtubule associated protein like 2	Downregulated
SAR1A	56681	120.52	0	0.760877	0.001	-9.57152	2.92608e-36	1.54446e-35	secretion associated, Ras related GTPase 1A	Downregulated
ATAD5	79915	275.453	0	0.760751	0.001	-9.57128	3.64986e-82	5.53378e-81	ATPase family, AAA domain containing 5	Downregulated
BRF2	55290	79.8667	0	0.760382	0.001	-9.57058	4.06104e-24	1.47504e-23	BRF2, RNA polymerase III transcription initiation factor 50 kDa subunit	Downregulated
FAAH	2166	83.7184	0	0.759644	0.001	-9.56918	2.65472e-25	1.00403e-24	fatty acid amide hydrolase	Downregulated
RRP1	8568	72.2907	0	0.759637	0.001	-9.56917	4.80532e-22	1.62633e-21	ribosomal RNA processing 1	Downregulated
LOC401010	401010	109.358	0	0.758939	0.001	-9.56784	5.29652e-33	2.55835e-32	nucleolar complex associated 2 homolog (S. cerevisiae) pseudogene	Downregulated
PIGV	55650	100.35	0	0.75864	0.001	-9.56727	2.45124e-30	1.08574e-29	phosphatidylinositol glycan anchor biosynthesis, class V	Downregulated
RNF103	7844	100.53	0	0.758526	0.001	-9.56705	2.45124e-30	1.08494e-29	ring finger protein 103	Downregulated
TPSD1	23430	33.524	0	0.757934	0.001	-9.56593	1.70515e-10	3.68728e-10	tryptase delta 1	Downregulated
SERTAD1	29950	47.7796	0	0.756887	0.001	-9.56393	1.21785e-14	3.15648e-14	SERTA domain containing 1	Downregulated
UBE2E1	7324	72.9919	0	0.756516	0.001	-9.56323	4.80532e-22	1.63278e-21	ubiquitin-conjugating enzyme E2E 1	Downregulated
FZD6	8323	146.365	0	0.754774	0.001	-9.5599	5.83794e-44	3.75278e-43	frizzled class receptor 6	Downregulated
ANXA8	653145	74.9367	0	0.75199	0.001	-9.55457	1.2286e-22	4.25529e-22	annexin A8	Downregulated
MSMO1	6307	76.8402	0	0.751198	0.001	-9.55305	3.14124e-23	1.10843e-22	methylsterol monooxygenase 1	Downregulated
SLC25A1	6576	59.3664	0	0.750342	0.001	-9.5514	3.40202e-18	1.01143e-17	solute carrier family 25 (mitochondrial carrier; citrate transporter), member 1	Downregulated
MRPL19	9801	308.982	0	0.749551	0.001	-9.54988	6.1541e-92	1.14394e-90	mitochondrial ribosomal protein L19	Downregulated
ATP6V1C1	528	224.758	0	0.748776	0.001	-9.54839	4.63636e-67	5.09363e-66	ATPase, H+ transporting, lysosomal 42kDa, V1 subunit C1	Downregulated
PRPF18	8559	66.8017	0	0.747126	0.001	-9.54521	2.8751e-20	9.21628e-20	pre-mRNA processing factor 18	Downregulated
CHAF1A	10036	131.11	0	0.746622	0.001	-9.54423	1.61653e-39	9.27436e-39	chromatin assembly factor 1, subunit A (p150)	Downregulated
PDXDC2P	283970	168.342	0	0.745017	0.001	-9.54113	1.78177e-50	1.35758e-49	pyridoxal-dependent decarboxylase domain containing 2, pseudogene	Downregulated
TOP1MT	116447	74.1197	0	0.744186	0.001	-9.53952	1.2286e-22	4.24427e-22	topoisomerase (DNA) I, mitochondrial	Downregulated
SENP3	26168	97.8575	0	0.743988	0.001	-9.53914	1.89605e-29	8.18984e-29	SUMO1/sentrin/SMT3 specific peptidase 3	Downregulated
LSM1	27257	40.2987	0	0.742707	0.001	-9.53665	1.44105e-12	3.41237e-12	LSM1, U6 small nuclear RNA associated	Downregulated
SNHG6	641638	17.8295	0	0.742414	0.001	-9.53608	9.33774e-06	1.56188e-05	small nucleolar RNA host gene 6	Downregulated
DSTN	11034	62.5085	0	0.741573	0.001	-9.53444	4.39816e-19	1.34968e-18	destrin (actin depolymerizing factor)	Downregulated
EBAG9	9166	85.6873	0	0.740958	0.001	-9.53325	6.78748e-26	2.60396e-25	estrogen receptor binding site associated, antigen, 9	Downregulated
NECAP2	55707	78.1323	0	0.740521	0.001	-9.5324	8.03142e-24	2.87627e-23	NECAP endocytosis associated 2	Downregulated
MPP7	143098	202.685	0	0.739902	0.001	-9.53119	1.51909e-60	1.45349e-59	membrane protein, palmitoylated 7 (MAGUK p55 subfamily member 7)	Downregulated
ADAM23	8745	242.379	0	0.738404	0.001	-9.52827	2.16466e-72	2.68803e-71	ADAM metallopeptidase domain 23	Downregulated
BUB1B	701	145.075	0	0.736498	0.001	-9.52454	1.15455e-43	7.34705e-43	BUB1 mitotic checkpoint serine/threonine kinase B	Downregulated
TNIP2	79155	66.7358	0	0.736094	0.001	-9.52375	2.8751e-20	9.21382e-20	TNFAIP3 interacting protein 2	Downregulated
PDSS1	23590	64.5191	0	0.735491	0.001	-9.52256	1.1245e-19	3.51733e-19	prenyl (decaprenyl) diphosphate synthase, subunit 1	Downregulated
PACS1	55690	174.301	0	0.734827	0.001	-9.52126	2.97798e-52	2.37921e-51	phosphofurin acidic cluster sorting protein 1	Downregulated
C19orf70	125988	35.8755	0	0.734018	0.001	-9.51967	4.35966e-11	9.68921e-11	chromosome 19 open reading frame 70	Downregulated
LOC100862671	100862671	81.1753	0	0.732708	0.001	-9.51709	1.03831e-24	3.85411e-24	transmembrane protein 265	Downregulated
FILIP1	27145	37.4848	0	0.732155	0.001	-9.51601	1.11466e-11	2.53886e-11	filamin A interacting protein 1	Downregulated
TMEM11	8834	53.1626	0	0.730401	0.001	-9.51254	2.03548e-16	5.66706e-16	transmembrane protein 11	Downregulated
PTRHD1	391356	22.531	0	0.729699	0.001	-9.51116	3.0865e-07	5.66968e-07	peptidyl-tRNA hydrolase domain containing 1	Downregulated
ANKRD13C	81573	218.096	0	0.729401	0.001	-9.51057	2.774e-65	2.92451e-64	ankyrin repeat domain 13C	Downregulated
NFE2L2	4780	104.221	0	0.729169	0.001	-9.51011	1.60238e-31	7.39199e-31	nuclear factor, erythroid 2-like 2	Downregulated
PRICKLE1	144165	163.269	0	0.727502	0.001	-9.50681	5.39046e-49	3.9541e-48	prickle homolog 1 (Drosophila)	Downregulated
PCYOX1	51449	205.57	0	0.726634	0.001	-9.50509	1.9639e-61	1.90335e-60	prenylcysteine oxidase 1	Downregulated
TYSND1	219743	111.18	0	0.726228	0.001	-9.50428	1.35419e-33	6.64806e-33	trypsin domain containing 1	Downregulated
RFTN1	23180	115.6	0	0.726182	0.001	-9.50419	8.8524e-35	4.48711e-34	raftlin, lipid raft linker 1	Downregulated
GPR75-ASB3	100302652	76.2732	0	0.72617	0.001	-9.50416	3.14124e-23	1.10909e-22	GPR75-ASB3 readthrough	Downregulated
MAFG	4097	192.931	0	0.726121	0.001	-9.50407	1.39038e-57	1.23855e-56	v-maf avian musculoaponeurotic fibrosarcoma oncogene homolog G	Downregulated
HAS3	3038	46.2236	0	0.725566	0.001	-9.50296	2.40852e-14	6.17585e-14	hyaluronan synthase 3	Downregulated
NSUN6	221078	97.6967	0	0.725018	0.001	-9.50187	1.89605e-29	8.21051e-29	NOP2/Sun domain family, member 6	Downregulated
ID3	3399	47.1538	0	0.723385	0.001	-9.49862	1.21785e-14	3.15989e-14	inhibitor of DNA binding 3, dominant negative helix-loop-helix protein	Downregulated
IGFBP1	3484	62.7151	0	0.723193	0.001	-9.49824	4.39816e-19	1.3483e-18	insulin-like growth factor binding protein 1	Downregulated
NEK1	4750	205.43	0	0.722496	0.001	-9.49685	1.9639e-61	1.90489e-60	NIMA-related kinase 1	Downregulated
CPE	1363	93.1516	0	0.722415	0.001	-9.49668	2.90048e-28	1.20641e-27	carboxypeptidase E	Downregulated
GATAD2B	57459	284.343	0	0.721852	0.001	-9.49556	7.88646e-85	1.27286e-83	GATA zinc finger domain containing 2B	Downregulated
POT1	25913	159.641	0	0.720479	0.001	-9.49281	8.24604e-48	5.86255e-47	protection of telomeres 1	Downregulated
KCNS3	3790	89.0682	0	0.718694	0.001	-9.48923	4.437e-27	1.77008e-26	potassium voltage-gated channel, modifier subfamily S, member 3	Downregulated
ADAMTS6	11174	275.744	0	0.718409	0.001	-9.48866	3.64986e-82	5.54779e-81	ADAM metallopeptidase with thrombospondin type 1 motif, 6	Downregulated
MRPL54	116541	23.1583	0	0.718102	0.001	-9.48804	1.56067e-07	2.90552e-07	mitochondrial ribosomal protein L54	Downregulated
ANAPC7	51434	115.598	0	0.71737	0.001	-9.48657	8.8524e-35	4.50804e-34	anaphase promoting complex subunit 7	Downregulated
CNTRL	11064	280.717	0	0.717359	0.001	-9.48655	1.20643e-83	1.89866e-82	centriolin	Downregulated
RABGGTA	5875	74.8714	0	0.717149	0.001	-9.48613	1.2286e-22	4.23695e-22	Rab geranylgeranyltransferase, alpha subunit	Downregulated
FAM126B	285172	353.071	0	0.716892	0.001	-9.48561	2.89864e-105	6.77176e-104	family with sequence similarity 126, member B	Downregulated
FRS2	10818	251.257	0	0.714873	0.001	-9.48154	4.6773e-75	6.18557e-74	fibroblast growth factor receptor substrate 2	Downregulated
C12orf4	57102	144.897	0	0.714345	0.001	-9.48048	2.28334e-43	1.44155e-42	chromosome 12 open reading frame 4	Downregulated
SDHAP2	727956	86.7682	0	0.714126	0.001	-9.48003	3.43204e-26	1.33675e-25	succinate dehydrogenase complex, subunit A, flavoprotein pseudogene 2	Downregulated
C14orf80	283643	57.994	0	0.712483	0.001	-9.47671	1.33059e-17	3.8659e-17	chromosome 14 open reading frame 80	Downregulated
INVS	27130	126.229	0	0.711345	0.001	-9.47441	4.89054e-38	2.70127e-37	inversin	Downregulated
SUGT1	10910	66.8212	0	0.709641	0.001	-9.47095	2.8751e-20	9.19419e-20	SGT1, suppressor of G2 allele of SKP1 (S. cerevisiae)	Downregulated
DESI2	51029	149.486	0	0.709287	0.001	-9.47023	7.54734e-45	4.99606e-44	desumoylating isopeptidase 2	Downregulated
HK1	3098	134.423	0	0.707999	0.001	-9.4676	2.08986e-40	1.22834e-39	hexokinase 1	Downregulated
PLEKHA1	59338	138.808	0	0.707907	0.001	-9.46742	1.36615e-41	8.30619e-41	pleckstrin homology domain containing, family A (phosphoinositide binding specific) member 1	Downregulated
MRPL14	64928	28.9191	0	0.707886	0.001	-9.46737	5.15868e-09	1.04215e-08	mitochondrial ribosomal protein L14	Downregulated
PIBF1	10464	115.681	0	0.707686	0.001	-9.46697	8.8524e-35	4.4985e-34	progesterone immunomodulatory binding factor 1	Downregulated
URI1	8725	127.221	0	0.707259	0.001	-9.46609	2.47288e-38	1.37474e-37	URI1, prefoldin-like chaperone	Downregulated
SECISBP2	79048	126.786	0	0.707126	0.001	-9.46582	4.89054e-38	2.70625e-37	SECIS binding protein 2	Downregulated
GNB4	59345	239.018	0	0.706357	0.001	-9.46425	1.67438e-71	2.03707e-70	guanine nucleotide binding protein (G protein), beta polypeptide 4	Downregulated
SNRNP40	9410	60.314	0	0.704944	0.001	-9.46136	1.72021e-18	5.17701e-18	small nuclear ribonucleoprotein 40kDa (U5)	Downregulated
CD59	966	283.587	0	0.704358	0.001	-9.46017	1.55969e-84	2.5005e-83	CD59 molecule, complement regulatory protein	Downregulated
DIP2B	57609	323.176	0	0.703945	0.001	-9.45932	2.2225e-96	4.47031e-95	DIP2 disco-interacting protein 2 homolog B (Drosophila)	Downregulated
UIMC1	51720	97.372	0	0.703939	0.001	-9.45931	1.89605e-29	8.20164e-29	ubiquitin interaction motif containing 1	Downregulated
MAP2K3	5606	85.5221	0	0.703871	0.001	-9.45917	6.78748e-26	2.61231e-25	mitogen-activated protein kinase kinase 3	Downregulated
ZNF383	163087	62.2791	0	0.703605	0.001	-9.45862	4.39816e-19	1.34624e-18	zinc finger protein 383	Downregulated
HARS	3035	75.3964	0	0.703491	0.001	-9.45839	6.21238e-23	2.17045e-22	histidyl-tRNA synthetase	Downregulated
CEP85	64793	118.409	0	0.703447	0.001	-9.4583	1.14445e-35	5.95948e-35	centrosomal protein 85kDa	Downregulated
C1QA	712	40.1358	0	0.703438	0.001	-9.45828	1.44105e-12	3.42385e-12	complement component 1, q subcomponent, A chain	Downregulated
ZNF24	7572	233.646	0	0.703318	0.001	-9.45803	1.0018e-69	1.17707e-68	zinc finger protein 24	Downregulated
LOC286186	286186	92.7344	0	0.701939	0.001	-9.4552	5.7362e-28	2.35972e-27	long intergenic non-protein coding RNA 1299	Downregulated
SMC6	79677	191.465	0	0.701512	0.001	-9.45432	2.74972e-57	2.42963e-56	structural maintenance of chromosomes 6	Downregulated
MYPOP	339344	70.0025	0	0.70099	0.001	-9.45325	1.87945e-21	6.26554e-21	Myb-related transcription factor, partner of profilin	Downregulated
PAPOLG	64895	272.152	0	0.699717	0.001	-9.45063	2.8232e-81	4.19567e-80	poly(A) polymerase gamma	Downregulated
RASGEF1B	153020	104.103	0	0.699659	0.001	-9.45051	1.60238e-31	7.40907e-31	RasGEF domain family, member 1B	Downregulated
INO80B-WBP1	100532735	77.3371	0	0.699397	0.001	-9.44997	1.58835e-23	5.6479e-23	INO80B-WBP1 readthrough (NMD candidate)	Downregulated
MITD1	129531	34.8932	0	0.698827	0.001	-9.44879	8.622e-11	1.89067e-10	MIT, microtubule interacting and transport, domain containing 1	Downregulated
BAK1	578	80.5848	0	0.69843	0.001	-9.44797	2.05344e-24	7.54982e-24	BCL2-antagonist/killer 1	Downregulated
ZNF384	171017	115.047	0	0.697725	0.001	-9.44651	8.8524e-35	4.4947e-34	zinc finger protein 384	Downregulated
PCCB	5096	68.7658	0	0.697453	0.001	-9.44595	7.35092e-21	2.39799e-20	propionyl CoA carboxylase, beta polypeptide	Downregulated
SMG8	55181	120.221	0	0.697401	0.001	-9.44584	2.92608e-36	1.54039e-35	SMG8 nonsense mediated mRNA decay factor	Downregulated
GLRX2	51022	26.9894	0	0.696654	0.001	-9.4443	2.01766e-08	3.94465e-08	glutaredoxin 2	Downregulated
C19orf48	84798	63.5766	0	0.696101	0.001	-9.44315	2.2239e-19	6.87731e-19	chromosome 19 open reading frame 48	Downregulated
LOC729020	729020	77.533	0	0.695195	0.001	-9.44127	1.58835e-23	5.63955e-23	ribulose-5-phosphate-3-epimerase-like 1	Downregulated
ISOC1	51015	70.6124	0	0.694976	0.001	-9.44082	1.87945e-21	6.27774e-21	isochorismatase domain containing 1	Downregulated
CXADRP2	646243	90.1464	0	0.69456	0.001	-9.43996	2.24354e-27	9.04952e-27	coxsackie virus and adenovirus receptor pseudogene 2	Downregulated
POFUT2	23275	104.822	0	0.694152	0.001	-9.43911	1.60238e-31	7.40337e-31	protein O-fucosyltransferase 2	Downregulated
RAB6A	5870	124.618	0	0.694013	0.001	-9.43882	1.91279e-37	1.03884e-36	RAB6A, member RAS oncogene family	Downregulated
SYNGAP1	8831	219.042	0	0.692359	0.001	-9.43538	1.40266e-65	1.49318e-64	synaptic Ras GTPase activating protein 1	Downregulated
RAB3GAP2	25782	267.072	0	0.692008	0.001	-9.43464	8.54114e-80	1.22535e-78	RAB3 GTPase activating protein subunit 2 (non-catalytic)	Downregulated
CHKA	1119	97.0173	0	0.690496	0.001	-9.43149	1.89605e-29	8.19278e-29	choline kinase alpha	Downregulated
ABT1	29777	81.7453	0	0.689254	0.001	-9.42889	1.03831e-24	3.84698e-24	activator of basal transcription 1	Downregulated
UBE2MP1	606551	34.3335	0	0.689074	0.001	-9.42852	8.622e-11	1.88345e-10	ubiquitin-conjugating enzyme E2M pseudogene 1	Downregulated
GUCD1	83606	118.981	0	0.688547	0.001	-9.42741	1.14445e-35	5.95689e-35	guanylyl cyclase domain containing 1	Downregulated
ITSN2	50618	166.395	0	0.688328	0.001	-9.42695	6.96884e-50	5.22685e-49	intersectin 2	Downregulated
MCF2L	23263	232.231	0	0.68673	0.001	-9.4236	1.98124e-69	2.30531e-68	MCF.2 cell line derived transforming sequence-like	Downregulated
HOXC6	3223	60.0038	0	0.683196	0.001	-9.41616	1.72021e-18	5.1822e-18	homeobox C6	Downregulated
DCTN4	51164	141.293	0	0.682894	0.001	-9.41552	1.76617e-42	1.08984e-41	dynactin 4 (p62)	Downregulated
-	101929497	17.7328	0	0.682861	0.001	-9.41545	9.33774e-06	1.55928e-05	uncharacterized LOC101929497	Downregulated
KIAA1958	158405	271.362	0	0.681141	0.001	-9.41181	5.58336e-81	8.25677e-80	KIAA1958	Downregulated
SEPT10	151011	105.127	0	0.680938	0.001	-9.41138	8.10234e-32	3.78277e-31	septin 10	Downregulated
-	101928103	79.8644	0	0.680665	0.001	-9.4108	4.06104e-24	1.47683e-23	uncharacterized LOC101928103	Downregulated
FNIP2	57600	207.61	0	0.680048	0.001	-9.40949	5.02122e-62	4.94625e-61	folliculin interacting protein 2	Downregulated
SLC25A29	123096	84.4467	0	0.679089	0.001	-9.40746	1.34234e-25	5.1106e-25	solute carrier family 25 (mitochondrial carnitine/acylcarnitine carrier), member 29	Downregulated
TRIM25	7706	204.978	0	0.67811	0.001	-9.40538	3.88396e-61	3.73407e-60	tripartite motif containing 25	Downregulated
FMO5	2330	90.2538	0	0.678016	0.001	-9.40518	2.24354e-27	9.04345e-27	flavin containing monooxygenase 5	Downregulated
WASF3	10810	172.578	0	0.677796	0.001	-9.40471	1.16475e-51	9.14735e-51	WAS protein family, member 3	Downregulated
TMEM107	84314	62.2806	0	0.677757	0.001	-9.40462	4.39816e-19	1.3459e-18	transmembrane protein 107	Downregulated
OGFR	11054	86.0543	0	0.677637	0.001	-9.40437	3.43204e-26	1.33848e-25	opioid growth factor receptor	Downregulated
IGLL3P	91353	23.5471	0	0.676972	0.001	-9.40295	1.56067e-07	2.9141e-07	immunoglobulin lambda-like polypeptide 3, pseudogene	Downregulated
RRP8	23378	62.2357	0	0.675716	0.001	-9.40027	4.39816e-19	1.34659e-18	ribosomal RNA processing 8, methyltransferase, homolog (yeast)	Downregulated
MTA3	57504	78.3137	0	0.674121	0.001	-9.39686	8.03142e-24	2.88487e-23	metastasis associated 1 family, member 3	Downregulated
IFNGR1	3459	75.451	0	0.673975	0.001	-9.39655	6.21238e-23	2.17108e-22	interferon gamma receptor 1	Downregulated
DDX18	8886	133.842	0	0.672085	0.001	-9.3925	4.13308e-40	2.41391e-39	DEAD (Asp-Glu-Ala-Asp) box polypeptide 18	Downregulated
LLGL1	3996	149.19	0	0.671714	0.001	-9.3917	7.54734e-45	5.00433e-44	lethal giant larvae homolog 1 (Drosophila)	Downregulated
ZNF26	7574	109.365	0	0.671649	0.001	-9.39156	5.29652e-33	2.55117e-32	zinc finger protein 26	Downregulated
RAB11A	8766	170.902	0	0.670237	0.001	-9.38853	4.55556e-51	3.52696e-50	RAB11A, member RAS oncogene family	Downregulated
SKP1P2	728622	65.869	0	0.669148	0.001	-9.38618	5.686e-20	1.80104e-19	S-phase kinase-associated protein 1 pseudogene 2	Downregulated
SLC4A11	83959	109.149	0	0.668588	0.001	-9.38497	5.29652e-33	2.55629e-32	solute carrier family 4, sodium borate transporter, member 11	Downregulated
GDNF	2668	133.829	0	0.668477	0.001	-9.38473	4.13308e-40	2.4198e-39	glial cell derived neurotrophic factor	Downregulated
SNCA	6622	105.811	0	0.667122	0.001	-9.38181	8.10234e-32	3.7813e-31	synuclein, alpha (non A4 component of amyloid precursor)	Downregulated
CEP152	22995	192.198	0	0.666801	0.001	-9.38111	1.39038e-57	1.23947e-56	centrosomal protein 152kDa	Downregulated
C3orf67	200844	89.1604	0	0.66663	0.001	-9.38074	4.437e-27	1.77658e-26	chromosome 3 open reading frame 67	Downregulated
PPM1A	5494	151.824	0	0.666314	0.001	-9.38006	1.92968e-45	1.30031e-44	protein phosphatase, Mg2+/Mn2+ dependent, 1A	Downregulated
TTC9C	283237	40.0115	0	0.665551	0.001	-9.37841	1.44105e-12	3.42792e-12	tetratricopeptide repeat domain 9C	Downregulated
ITPRIPL1	150771	69.8987	0	0.664588	0.001	-9.37632	3.71696e-21	1.22855e-20	inositol 1,4,5-trisphosphate receptor interacting protein-like 1	Downregulated
ASH2L	9070	101.051	0	0.66321	0.001	-9.37332	1.23945e-30	5.54728e-30	ash2 (absent, small, or homeotic)-like (Drosophila)	Downregulated
JAK2	3717	183.929	0	0.66149	0.001	-9.36958	6.4347e-55	5.4185e-54	Janus kinase 2	Downregulated
ELK1	2002	77.3024	0	0.6612	0.001	-9.36894	1.58835e-23	5.64456e-23	ELK1, member of ETS oncogene family	Downregulated
SMIM20	389203	34.9934	0	0.660348	0.001	-9.36708	8.622e-11	1.88653e-10	small integral membrane protein 20	Downregulated
CLINT1	9685	138.883	0	0.65947	0.001	-9.36516	1.36615e-41	8.28522e-41	clathrin interactor 1	Downregulated
PSAT1	29968	78.4032	0	0.659314	0.001	-9.36482	8.03142e-24	2.88746e-23	phosphoserine aminotransferase 1	Downregulated
PSMC2	5701	98.2971	0	0.658305	0.001	-9.36261	9.58726e-30	4.19547e-29	proteasome (prosome, macropain) 26S subunit, ATPase, 2	Downregulated
SAP30BP	29115	91.2926	0	0.658158	0.001	-9.36229	1.13443e-27	4.61616e-27	SAP30 binding protein	Downregulated
CALCOCO1	57658	96.3205	0	0.658095	0.001	-9.36215	3.74976e-29	1.60869e-28	calcium binding and coiled-coil domain 1	Downregulated
TESC	54997	35.4831	0	0.657794	0.001	-9.36149	4.35966e-11	9.68204e-11	tescalcin	Downregulated
TECPR2	9895	153.049	0	0.657523	0.001	-9.3609	4.93372e-46	3.37189e-45	tectonin beta-propeller repeat containing 2	Downregulated
PLEKHM1P	440456	100.5	0	0.655449	0.001	-9.35634	2.45124e-30	1.08695e-29	pleckstrin homology domain containing, family M (with RUN domain) member 1 pseudogene	Downregulated
RUVBL2	10856	50.8828	0	0.655357	0.001	-9.35614	1.57445e-15	4.23049e-15	RuvB-like AAA ATPase 2	Downregulated
IFI16	3428	94.4619	0	0.654842	0.001	-9.355	1.46661e-28	6.16201e-28	interferon, gamma-inducible protein 16	Downregulated
SF3A1	10291	177.477	0	0.653929	0.001	-9.35299	3.84996e-53	3.14065e-52	splicing factor 3a, subunit 1, 120kDa	Downregulated
C9orf156	51531	56.8036	0	0.653434	0.001	-9.3519	2.63148e-17	7.57947e-17	chromosome 9 open reading frame 156	Downregulated
YDJC	150223	45.9694	0	0.653368	0.001	-9.35175	4.76326e-14	1.20822e-13	YdjC homolog (bacterial)	Downregulated
SPSB3	90864	52.9652	0	0.65331	0.001	-9.35162	4.0255e-16	1.10311e-15	splA/ryanodine receptor domain and SOCS box containing 3	Downregulated
B4GALNT4	338707	118.785	0	0.653082	0.001	-9.35112	1.14445e-35	5.95431e-35	beta-1,4-N-acetyl-galactosaminyl transferase 4	Downregulated
HSPA13	6782	136.956	0	0.651303	0.001	-9.34719	5.34328e-41	3.20011e-40	heat shock protein 70kDa family, member 13	Downregulated
TRPC1	7220	139.18	0	0.649489	0.001	-9.34316	6.90786e-42	4.21064e-41	transient receptor potential cation channel, subfamily C, member 1	Downregulated
VWA9	81556	74.2054	0	0.649378	0.001	-9.34291	1.2286e-22	4.23452e-22	von Willebrand factor A domain containing 9	Downregulated
CERS1	10715	68.0234	0	0.648587	0.001	-9.34116	7.35092e-21	2.39733e-20	ceramide synthase 1	Downregulated
MRPL43	84545	25.6401	0	0.647707	0.001	-9.3392	3.99028e-08	7.67504e-08	mitochondrial ribosomal protein L43	Downregulated
ORAOV1	220064	85.9942	0	0.644738	0.001	-9.33257	6.78748e-26	2.6048e-25	oral cancer overexpressed 1	Downregulated
TRO	7216	64.7675	0	0.644549	0.001	-9.33215	1.1245e-19	3.51825e-19	trophinin	Downregulated
SNX6	58533	101.595	0	0.64422	0.001	-9.33141	1.23945e-30	5.54934e-30	sorting nexin 6	Downregulated
UBE2NL	389898	39.6672	0	0.64344	0.001	-9.32966	2.84992e-12	6.63471e-12	ubiquitin-conjugating enzyme E2N-like (gene/pseudogene)	Downregulated
SLC5A3	6526	393.373	0	0.642158	0.001	-9.32678	4.13046e-117	1.14546e-115	solute carrier family 5 (sodium/myo-inositol cotransporter), member 3	Downregulated
PTCD2	79810	60.3952	0	0.641397	0.001	-9.32507	1.72021e-18	5.1809e-18	pentatricopeptide repeat domain 2	Downregulated
ZNF143	7702	96.3083	0	0.63956	0.001	-9.32094	3.74976e-29	1.60639e-28	zinc finger protein 143	Downregulated
OGDHL	55753	113.984	0	0.638734	0.001	-9.31907	3.46236e-34	1.72873e-33	oxoglutarate dehydrogenase-like	Downregulated
ZNF652	22834	385.071	0	0.63757	0.001	-9.31644	9.66578e-115	2.56785e-113	zinc finger protein 652	Downregulated
PRKD3	23683	198.166	0	0.636568	0.001	-9.31417	2.32382e-59	2.16481e-58	protein kinase D3	Downregulated
DPH3	285381	135.947	0	0.636279	0.001	-9.31352	1.05673e-40	6.28178e-40	diphthamide biosynthesis 3	Downregulated
WDR46	9277	73.309	0	0.635952	0.001	-9.31277	2.42978e-22	8.32434e-22	WD repeat domain 46	Downregulated
VWA7	80737	97.1513	0	0.63536	0.001	-9.31143	1.89605e-29	8.2194e-29	von Willebrand factor A domain containing 7	Downregulated
DHRSX	207063	86.3549	0	0.634388	0.001	-9.30922	3.43204e-26	1.33892e-25	dehydrogenase/reductase (SDR family) X-linked	Downregulated
ETFDH	2110	74.9141	0	0.634196	0.001	-9.30878	1.2286e-22	4.24671e-22	electron-transferring-flavoprotein dehydrogenase	Downregulated
MRPL36	64979	20.3626	0	0.633485	0.001	-9.30717	1.20719e-06	2.13365e-06	mitochondrial ribosomal protein L36	Downregulated
ZNF330	27309	60.9396	0	0.632293	0.001	-9.30445	1.72021e-18	5.17441e-18	zinc finger protein 330	Downregulated
PTPRCAP	5790	30.0325	0	0.63222	0.001	-9.30428	1.31895e-09	2.74202e-09	protein tyrosine phosphatase, receptor type, C-associated protein	Downregulated
CXorf40A	91966	79.6214	0	0.631971	0.001	-9.30371	4.06104e-24	1.47594e-23	chromosome X open reading frame 40A	Downregulated
CXXC5	51523	47.6346	0	0.631111	0.001	-9.30175	1.21785e-14	3.15444e-14	CXXC finger protein 5	Downregulated
CHKB	1120	54.31	0	0.630878	0.001	-9.30122	1.02922e-16	2.89775e-16	choline kinase beta	Downregulated
PCGF5	84333	38.5171	0	0.630726	0.001	-9.30087	5.63624e-12	1.29954e-11	polycomb group ring finger 5	Downregulated
ST7	7982	87.0167	0	0.627443	0.001	-9.29334	1.7354e-26	6.82786e-26	suppression of tumorigenicity 7	Downregulated
DCUN1D5	84259	420.727	0	0.626908	0.001	-9.29211	4.16692e-125	1.28298e-123	DCN1, defective in cullin neddylation 1, domain containing 5	Downregulated
TNKS	8658	316.554	0	0.625908	0.001	-9.28981	2.62982e-94	5.05262e-93	tankyrase, TRF1-interacting ankyrin-related ADP-ribose polymerase	Downregulated
ZDHHC16	84287	44.2813	0	0.624224	0.001	-9.28592	9.42018e-14	2.36549e-13	zinc finger, DHHC-type containing 16	Downregulated
UPF2	26019	171.31	0	0.624163	0.001	-9.28578	2.3035e-51	1.79964e-50	UPF2 regulator of nonsense transcripts homolog (yeast)	Downregulated
-	101928630	18.8744	0	0.624075	0.001	-9.28558	4.72158e-06	8.05695e-06	uncharacterized LOC101928630	Downregulated
METTL18	92342	48.1693	0	0.62083	0.001	-9.27805	6.158e-15	1.61841e-14	methyltransferase like 18	Downregulated
LEPROTL1	23484	88.5319	0	0.620316	0.001	-9.27686	8.77492e-27	3.47868e-26	leptin receptor overlapping transcript-like 1	Downregulated
CCDC9	26093	67.8971	0	0.619646	0.001	-9.2753	1.45377e-20	4.70536e-20	coiled-coil domain containing 9	Downregulated
PITPNB	23760	93.9093	0	0.618212	0.001	-9.27196	2.90048e-28	1.20724e-27	phosphatidylinositol transfer protein, beta	Downregulated
ATL2	64225	88.1985	0	0.617751	0.001	-9.27088	8.77492e-27	3.47409e-26	atlastin GTPase 2	Downregulated
FAM91A1	157769	173.546	0	0.616889	0.001	-9.26887	5.88948e-52	4.66189e-51	family with sequence similarity 91, member A1	Downregulated
TRAPPC10	7109	226.189	0	0.616339	0.001	-9.26758	1.18541e-67	1.32413e-66	trafficking protein particle complex 10	Downregulated
MED19	219541	51.6571	0	0.61631	0.001	-9.26751	7.96114e-16	2.16088e-15	mediator complex subunit 19	Downregulated
MRPS14	63931	69.5486	0	0.614874	0.001	-9.26415	3.71696e-21	1.22686e-20	mitochondrial ribosomal protein S14	Downregulated
WDR90	197335	179.275	0	0.614873	0.001	-9.26414	9.84346e-54	8.11258e-53	WD repeat domain 90	Downregulated
TFAP4	7023	69.0766	0	0.614428	0.001	-9.2631	3.71696e-21	1.2272e-20	transcription factor AP-4 (activating enhancer binding protein 4)	Downregulated
EPS8L2	64787	101.621	0	0.613357	0.001	-9.26058	1.23945e-30	5.54314e-30	EPS8-like 2	Downregulated
USP25	29761	166.112	0	0.613245	0.001	-9.26032	6.96884e-50	5.23011e-49	ubiquitin specific peptidase 25	Downregulated
C7orf25	79020	58.9541	0	0.613035	0.001	-9.25983	6.72808e-18	1.98406e-17	chromosome 7 open reading frame 25	Downregulated
OXCT1	5019	114.747	0	0.611533	0.001	-9.25629	1.75072e-34	8.82562e-34	3-oxoacid CoA transferase 1	Downregulated
KHDRBS3	10656	63.0318	0	0.61116	0.001	-9.25541	2.2239e-19	6.88795e-19	KH domain containing, RNA binding, signal transduction associated 3	Downregulated
ATRX	546	356.909	0	0.608809	0.001	-9.24985	3.7474e-106	8.85803e-105	alpha thalassemia/mental retardation syndrome X-linked	Downregulated
FPGS	2356	70.9862	0	0.607732	0.001	-9.24729	1.87945e-21	6.26033e-21	folylpolyglutamate synthase	Downregulated
TSEN15	116461	58.9564	0	0.607392	0.001	-9.24648	6.72808e-18	1.98211e-17	TSEN15 tRNA splicing endonuclease subunit	Downregulated
RIC8A	60626	120.114	0	0.607177	0.001	-9.24597	2.92608e-36	1.54242e-35	RIC8 guanine nucleotide exchange factor A	Downregulated
RPP21	79897	17.4247	0	0.606856	0.001	-9.24521	9.33774e-06	1.55971e-05	ribonuclease P/MRP 21kDa subunit	Downregulated
TMEM185A	84548	36.0965	0	0.606822	0.001	-9.24513	2.20444e-11	4.95524e-11	transmembrane protein 185A	Downregulated
ACSL4	2182	160.796	0	0.606622	0.001	-9.24465	4.16956e-48	3.00168e-47	acyl-CoA synthetase long-chain family member 4	Downregulated
HLCS	3141	221.979	0	0.606349	0.001	-9.244	3.58626e-66	3.86917e-65	holocarboxylase synthetase (biotin-(proprionyl-CoA-carboxylase (ATP-hydrolysing)) ligase)	Downregulated
HNRNPUL2	221092	164.171	0	0.605255	0.001	-9.2414	2.72566e-49	2.01786e-48	heterogeneous nuclear ribonucleoprotein U-like 2	Downregulated
FEM1B	10116	226.691	0	0.603642	0.001	-9.23755	1.18541e-67	1.3229e-66	fem-1 homolog b (C. elegans)	Downregulated
COX20	116228	83.1754	0	0.602619	0.001	-9.2351	2.65472e-25	1.00182e-24	COX20 cytochrome c oxidase assembly factor	Downregulated
SPRED1	161742	230.021	0	0.602101	0.001	-9.23386	7.74902e-69	8.87884e-68	sprouty-related, EVH1 domain containing 1	Downregulated
C10orf10	11067	64.8748	0	0.601627	0.001	-9.23273	1.1245e-19	3.5256e-19	chromosome 10 open reading frame 10	Downregulated
CDIPT	10423	60.5157	0	0.599966	0.001	-9.22874	1.72021e-18	5.16665e-18	CDP-diacylglycerol--inositol 3-phosphatidyltransferase	Downregulated
PDE12	201626	125.892	0	0.59989	0.001	-9.22855	9.6719e-38	5.29112e-37	phosphodiesterase 12	Downregulated
NFKBIL1	4795	44.153	0	0.598286	0.001	-9.22469	9.42018e-14	2.36006e-13	nuclear factor of kappa light polypeptide gene enhancer in B-cells inhibitor-like 1	Downregulated
PPAP2B	8613	104.325	0	0.597686	0.001	-9.22324	1.60238e-31	7.38632e-31	phosphatidic acid phosphatase type 2B	Downregulated
TNRC6C	57690	304.995	0	0.597627	0.001	-9.2231	9.41422e-91	1.71542e-89	trinucleotide repeat containing 6C	Downregulated
ARMCX4	100131755	209.657	0	0.59728	0.001	-9.22226	1.28381e-62	1.27827e-61	armadillo repeat containing, X-linked 4	Downregulated
RBM33	155435	324.905	0	0.597176	0.001	-9.22201	1.12379e-96	2.27564e-95	RNA binding motif protein 33	Downregulated
SRSF5	6430	47.2366	0	0.596633	0.001	-9.2207	1.21785e-14	3.16194e-14	serine/arginine-rich splicing factor 5	Downregulated
OSBP	5007	159.481	0	0.596437	0.001	-9.22023	8.24604e-48	5.85908e-47	oxysterol binding protein	Downregulated
AAED1	195827	38.5203	0	0.595763	0.001	-9.21859	5.63624e-12	1.29755e-11	AhpC/TSA antioxidant enzyme domain containing 1	Downregulated
ZNF367	195828	116.025	0	0.594595	0.001	-9.21576	4.47616e-35	2.2921e-34	zinc finger protein 367	Downregulated
EDEM3	80267	208.579	0	0.59398	0.001	-9.21427	2.53896e-62	2.51135e-61	ER degradation enhancer, mannosidase alpha-like 3	Downregulated
PRKAA2	5563	292.987	0	0.593558	0.001	-9.21325	3.3701e-87	5.74016e-86	protein kinase, AMP-activated, alpha 2 catalytic subunit	Downregulated
ATAD1	84896	94.4287	0	0.592992	0.001	-9.21187	1.46661e-28	6.1534e-28	ATPase family, AAA domain containing 1	Downregulated
SNRK-AS1	100873954	108.203	0	0.592833	0.001	-9.21148	1.04748e-32	5.00722e-32	SNRK antisense RNA 1	Downregulated
G0S2	50486	30.0509	0	0.592453	0.001	-9.21056	1.31895e-09	2.74107e-09	G0/G1 switch 2	Downregulated
SOX6	55553	279.317	0	0.591943	0.001	-9.20931	2.38592e-83	3.73049e-82	SRY (sex determining region Y)-box 6	Downregulated
PSMA3	5684	28.5264	0	0.591316	0.001	-9.20779	5.15868e-09	1.04303e-08	proteasome (prosome, macropain) subunit, alpha type, 3	Downregulated
SIRT3	23410	85.9751	0	0.591035	0.001	-9.2071	6.78748e-26	2.60563e-25	sirtuin 3	Downregulated
ZNF775	285971	70.272	0	0.589628	0.001	-9.20366	1.87945e-21	6.27077e-21	zinc finger protein 775	Downregulated
BDP1	55814	344.78	0	0.589552	0.001	-9.20348	1.34149e-102	2.99417e-101	B double prime 1, subunit of RNA polymerase III transcription initiation factor IIIB	Downregulated
RALA	5898	87.1292	0	0.587249	0.001	-9.19783	1.7354e-26	6.83234e-26	v-ral simian leukemia viral oncogene homolog A (ras related)	Downregulated
CHRM1	1128	88.1051	0	0.586524	0.001	-9.19605	8.77492e-27	3.47753e-26	cholinergic receptor, muscarinic 1	Downregulated
SNX11	29916	71.1166	0	0.586328	0.001	-9.19556	9.50336e-22	3.19564e-21	sorting nexin 11	Downregulated
ZNF335	63925	137.117	0	0.584441	0.001	-9.19091	2.7018e-41	1.63031e-40	zinc finger protein 335	Downregulated
RAB1B	81876	59.7758	0	0.584374	0.001	-9.19075	3.40202e-18	1.01343e-17	RAB1B, member RAS oncogene family	Downregulated
CASK	8573	252.651	0	0.583048	0.001	-9.18747	2.36504e-75	3.14153e-74	calcium/calmodulin-dependent serine protein kinase (MAGUK family)	Downregulated
METTL9	51108	99.6127	0	0.581236	0.001	-9.18298	4.84774e-30	2.13308e-29	methyltransferase like 9	Downregulated
PHF14	9678	157.897	0	0.580172	0.001	-9.18034	3.22518e-47	2.25556e-46	PHD finger protein 14	Downregulated
MDM1	56890	90.5492	0	0.579775	0.001	-9.17935	2.24354e-27	9.04648e-27	Mdm1 nuclear protein homolog (mouse)	Downregulated
MRPL34	64981	29.1015	0	0.579768	0.001	-9.17933	2.60846e-09	5.34421e-09	mitochondrial ribosomal protein L34	Downregulated
SSBP1	6742	21.5933	0	0.578448	0.001	-9.17604	6.1041e-07	1.09646e-06	single-stranded DNA binding protein 1, mitochondrial	Downregulated
THRB	7068	225.498	0	0.577418	0.001	-9.17347	2.34434e-67	2.59694e-66	thyroid hormone receptor, beta	Downregulated
SYTL2	54843	84.3005	0	0.57701	0.001	-9.17245	1.34234e-25	5.12197e-25	synaptotagmin-like 2	Downregulated
LOC100133612	100133612	59.3227	0	0.576968	0.001	-9.17235	3.40202e-18	1.01218e-17	long intergenic non-protein coding RNA 1134	Downregulated
ABHD13	84945	161.199	0	0.576352	0.001	-9.17081	2.10832e-48	1.52418e-47	abhydrolase domain containing 13	Downregulated
YPEL3	83719	27.9994	0	0.574733	0.001	-9.16675	1.02022e-08	2.02928e-08	yippee-like 3 (Drosophila)	Downregulated
TIGD5	84948	72.6426	0	0.574652	0.001	-9.16654	4.80532e-22	1.62679e-21	tigger transposable element derived 5	Downregulated
UCP2	7351	49.3025	0	0.573413	0.001	-9.16343	3.11376e-15	8.27396e-15	uncoupling protein 2 (mitochondrial, proton carrier)	Downregulated
TXNDC12	51060	72.4674	0	0.573267	0.001	-9.16306	4.80532e-22	1.62909e-21	thioredoxin domain containing 12 (endoplasmic reticulum)	Downregulated
TRNAU1AP	54952	56.4838	0	0.573191	0.001	-9.16287	2.63148e-17	7.56677e-17	tRNA selenocysteine 1 associated protein 1	Downregulated
DNAJC19	131118	41.6779	0	0.572613	0.001	-9.16142	7.28658e-13	1.75451e-12	DnaJ (Hsp40) homolog, subfamily C, member 19	Downregulated
LOC728407	728407	43.2158	0	0.572167	0.001	-9.16029	1.86301e-13	4.62306e-13	poly (ADP-ribose) glycohydrolase pseudogene 1	Downregulated
FAM58A	92002	37.6439	0	0.571936	0.001	-9.15971	1.11466e-11	2.54176e-11	family with sequence similarity 58, member A	Downregulated
CAMKMT	79823	47.2538	0	0.57133	0.001	-9.15818	1.21785e-14	3.16673e-14	calmodulin-lysine N-methyltransferase	Downregulated
CD320	51293	34.2755	0	0.569637	0.001	-9.1539	8.622e-11	1.89378e-10	CD320 molecule	Downregulated
SHMT2	6472	64.8523	0	0.569105	0.001	-9.15255	1.1245e-19	3.53113e-19	serine hydroxymethyltransferase 2 (mitochondrial)	Downregulated
ACBD3	64746	106.94	0	0.568486	0.001	-9.15098	4.0969e-32	1.92848e-31	acyl-CoA binding domain containing 3	Downregulated
MFSD1	64747	68.2256	0	0.567657	0.001	-9.14888	7.35092e-21	2.39994e-20	major facilitator superfamily domain containing 1	Downregulated
TMEM231	79583	86.9288	0	0.566355	0.001	-9.14556	3.43204e-26	1.33243e-25	transmembrane protein 231	Downregulated
ATP13A2	23400	112.799	0	0.566265	0.001	-9.14533	6.8474e-34	3.38647e-33	ATPase type 13A2	Downregulated
KIF16B	55614	141.858	0	0.566131	0.001	-9.14499	1.76617e-42	1.09208e-41	kinesin family member 16B	Downregulated
CDKN1B	1027	75.1436	0	0.5654	0.001	-9.14313	6.21238e-23	2.17234e-22	cyclin-dependent kinase inhibitor 1B (p27, Kip1)	Downregulated
SH3GLB2	56904	52.0944	0	0.565283	0.001	-9.14283	4.0255e-16	1.10487e-15	SH3-domain GRB2-like endophilin B2	Downregulated
ITGA8	8516	206.287	0	0.564788	0.001	-9.14157	9.93036e-62	9.69461e-61	integrin, alpha 8	Downregulated
ZBTB45	84878	70.7041	0	0.563791	0.001	-9.13902	1.87945e-21	6.25859e-21	zinc finger and BTB domain containing 45	Downregulated
LOC100268168	100268168	46.9086	0	0.56356	0.001	-9.13843	2.40852e-14	6.18113e-14	uncharacterized LOC100268168	Downregulated
GMCL1	64395	70.9275	0	0.563438	0.001	-9.13811	1.87945e-21	6.25512e-21	germ cell-less, spermatogenesis associated 1	Downregulated
EXOSC8	11340	41.9029	0	0.563047	0.001	-9.13711	7.28658e-13	1.7531e-12	exosome component 8	Downregulated
MSL1	339287	113.418	0	0.562962	0.001	-9.13689	3.46236e-34	1.72801e-33	male-specific lethal 1 homolog (Drosophila)	Downregulated
PGM1	5236	69.6728	0	0.562432	0.001	-9.13553	3.71696e-21	1.22518e-20	phosphoglucomutase 1	Downregulated
CNNM1	26507	177.054	0	0.561797	0.001	-9.13391	3.84996e-53	3.13639e-52	cyclin and CBS domain divalent metal cation transport mediator 1	Downregulated
PRPF3	9129	72.9675	0	0.561287	0.001	-9.13259	4.80532e-22	1.63185e-21	pre-mRNA processing factor 3	Downregulated
MRPS15	64960	28.0754	0	0.561097	0.001	-9.13211	5.15868e-09	1.03883e-08	mitochondrial ribosomal protein S15	Downregulated
TXNL4B	54957	70.7128	0	0.559387	0.001	-9.1277	1.87945e-21	6.26902e-21	thioredoxin-like 4B	Downregulated
TRIM33	51592	244.055	0	0.559049	0.001	-9.12683	5.5345e-73	6.94444e-72	tripartite motif containing 33	Downregulated
NELFE	7936	45.6336	0	0.557433	0.001	-9.12265	4.76326e-14	1.20695e-13	negative elongation factor complex member E	Downregulated
ZMYM6NB	100506144	26.7037	0	0.557193	0.001	-9.12203	2.01766e-08	3.93888e-08	ZMYM6 neighbor	Downregulated
CAP2	10486	89.9662	0	0.556483	0.001	-9.12019	4.437e-27	1.77421e-26	CAP, adenylate cyclase-associated protein, 2 (yeast)	Downregulated
CEPT1	10390	65.5827	0	0.556194	0.001	-9.11944	5.686e-20	1.80437e-19	choline/ethanolamine phosphotransferase 1	Downregulated
WDR34	89891	52.8667	0	0.556145	0.001	-9.11932	4.0255e-16	1.10437e-15	WD repeat domain 34	Downregulated
NRIP1	8204	221.088	0	0.555612	0.001	-9.11793	3.58626e-66	3.85876e-65	nuclear receptor interacting protein 1	Downregulated
ZFYVE27	118813	78.0696	0	0.555431	0.001	-9.11746	8.03142e-24	2.87799e-23	zinc finger, FYVE domain containing 27	Downregulated
KIAA0247	9766	157.581	0	0.555348	0.001	-9.11725	3.22518e-47	2.24901e-46	sushi domain containing 6	Downregulated
DCAF4L2	138009	97.1554	0	0.554099	0.001	-9.114	1.89605e-29	8.19868e-29	DDB1 and CUL4 associated factor 4-like 2	Downregulated
RUFY2	55680	63.0519	0	0.553818	0.001	-9.11327	2.2239e-19	6.89507e-19	RUN and FYVE domain containing 2	Downregulated
EZH1	2145	135.489	0	0.553588	0.001	-9.11267	1.05673e-40	6.288e-40	enhancer of zeste 1 polycomb repressive complex 2 subunit	Downregulated
GAREML	150946	150.433	0	0.553206	0.001	-9.11167	3.81628e-45	2.55297e-44	GRB2 associated, regulator of MAPK1-like	Downregulated
RNF145	153830	102.009	0	0.552941	0.001	-9.11098	6.26722e-31	2.83453e-30	ring finger protein 145	Downregulated
GDPD5	81544	92.6632	0	0.552773	0.001	-9.11054	5.7362e-28	2.35247e-27	glycerophosphodiester phosphodiesterase domain containing 5	Downregulated
ETFA	2108	39.1516	0	0.548646	0.001	-9.09973	2.84992e-12	6.636e-12	electron-transfer-flavoprotein, alpha polypeptide	Downregulated
ZNF2	7549	109.361	0	0.548574	0.001	-9.09954	5.29652e-33	2.56041e-32	zinc finger protein 2	Downregulated
WDR48	57599	113.648	0	0.547747	0.001	-9.09737	3.46236e-34	1.72945e-33	WD repeat domain 48	Downregulated
ZBTB7A	51341	128.291	0	0.547558	0.001	-9.09687	1.2504e-38	7.0228e-38	zinc finger and BTB domain containing 7A	Downregulated
FAM167A	83648	117.642	0	0.546824	0.001	-9.09493	2.26334e-35	1.16795e-34	family with sequence similarity 167, member A	Downregulated
LRSAM1	90678	81.733	0	0.546408	0.001	-9.09383	1.03831e-24	3.84816e-24	leucine rich repeat and sterile alpha motif containing 1	Downregulated
NMNAT3	349565	51.4014	0	0.545883	0.001	-9.09245	7.96114e-16	2.16137e-15	nicotinamide nucleotide adenylyltransferase 3	Downregulated
AUP1	550	47.3375	0	0.545868	0.001	-9.09241	1.21785e-14	3.16057e-14	ancient ubiquitous protein 1	Downregulated
SNX2	6643	187.957	0	0.544337	0.001	-9.08836	4.20638e-56	3.61821e-55	sorting nexin 2	Downregulated
TMCC1	23023	157.01	0	0.542932	0.001	-9.08463	3.22518e-47	2.25032e-46	transmembrane and coiled-coil domain family 1	Downregulated
FAM188B	84182	78.1322	0	0.541639	0.001	-9.08119	8.03142e-24	2.88315e-23	family with sequence similarity 188, member B	Downregulated
SIAH2	6478	74.7348	0	0.541466	0.001	-9.08073	1.2286e-22	4.24305e-22	siah E3 ubiquitin protein ligase 2	Downregulated
PPP6R2	9701	114.443	0	0.541343	0.001	-9.0804	1.75072e-34	8.79976e-34	protein phosphatase 6, regulatory subunit 2	Downregulated
NUF2	83540	52.1569	0	0.541166	0.001	-9.07993	4.0255e-16	1.10386e-15	NUF2, NDC80 kinetochore complex component	Downregulated
XPNPEP1	7511	70.2589	0	0.539356	0.001	-9.07509	1.87945e-21	6.276e-21	X-prolyl aminopeptidase (aminopeptidase P) 1, soluble	Downregulated
GRIPAP1	56850	86.3376	0	0.538966	0.001	-9.07405	3.43204e-26	1.33631e-25	GRIP1 associated protein 1	Downregulated
FRAT1	10023	74.7977	0	0.538012	0.001	-9.07149	1.2286e-22	4.25283e-22	frequently rearranged in advanced T-cell lymphomas 1	Downregulated
PRODH2	58510	47.1201	0	0.537797	0.001	-9.07092	1.21785e-14	3.16331e-14	proline dehydrogenase (oxidase) 2	Downregulated
MLXIP	22877	238.7	0	0.536977	0.001	-9.06872	3.31138e-71	4.00031e-70	MLX interacting protein	Downregulated
ST20	400410	15.2672	0	0.534666	0.001	-9.06249	3.65218e-05	5.88663e-05	suppressor of tumorigenicity 20	Downregulated
DGKG	1608	160.342	0	0.534458	0.001	-9.06193	4.16956e-48	2.99271e-47	diacylglycerol kinase, gamma 90kDa	Downregulated
PDK3	5165	50.303	0	0.53362	0.001	-9.05967	1.57445e-15	4.23807e-15	pyruvate dehydrogenase kinase, isozyme 3	Downregulated
ADH5	128	74.1665	0	0.53327	0.001	-9.05872	1.2286e-22	4.24916e-22	alcohol dehydrogenase 5 (class III), chi polypeptide	Downregulated
CYP2D6	1565	42.2962	0	0.533166	0.001	-9.05844	3.68442e-13	9.04385e-13	cytochrome P450, family 2, subfamily D, polypeptide 6	Downregulated
RP9	6100	32.8239	0	0.532891	0.001	-9.0577	3.37224e-10	7.18996e-10	retinitis pigmentosa 9 (autosomal dominant)	Downregulated
NACAD	23148	133.891	0	0.53281	0.001	-9.05748	4.13308e-40	2.41744e-39	NAC alpha domain containing	Downregulated
MOSPD1	56180	65.8233	0	0.532719	0.001	-9.05723	5.686e-20	1.79867e-19	motile sperm domain containing 1	Downregulated
API5	8539	101.116	0	0.532451	0.001	-9.0565	1.23945e-30	5.55348e-30	apoptosis inhibitor 5	Downregulated
LOC100128233	100128233	40.0042	0	0.531876	0.001	-9.05495	1.44105e-12	3.4252e-12	uncharacterized LOC100128233	Downregulated
THOC3	84321	44.8663	0	0.531276	0.001	-9.05332	9.42018e-14	2.36252e-13	THO complex 3	Downregulated
MARCH5	54708	109.896	0	0.530607	0.001	-9.0515	5.29652e-33	2.56144e-32	membrane-associated ring finger (C3HC4) 5	Downregulated
LINC00085	147650	55.9437	0	0.529957	0.001	-9.04973	5.20422e-17	1.47946e-16	sperm acrosome associated 6, pseudogene	Downregulated
AMY1B	277	50.8967	0	0.529541	0.001	-9.0486	1.57445e-15	4.22481e-15	amylase, alpha 1B (salivary)	Downregulated
HMMR	3161	81.0048	0	0.529215	0.001	-9.04771	1.03831e-24	3.85054e-24	hyaluronan-mediated motility receptor (RHAMM)	Downregulated
CREBZF	58487	210.902	0	0.528681	0.001	-9.04625	6.4915e-63	6.51211e-62	CREB/ATF bZIP transcription factor	Downregulated
PHF21A	51317	199.86	0	0.527596	0.001	-9.04329	1.17503e-59	1.10319e-58	PHD finger protein 21A	Downregulated
TRAPPC2P1	10597	20.5249	0	0.526919	0.001	-9.04144	1.20719e-06	2.14089e-06	trafficking protein particle complex 2B	Downregulated
RAVER2	55225	121.075	0	0.526246	0.001	-9.03959	1.47956e-36	7.85435e-36	ribonucleoprotein, PTB-binding 2	Downregulated
LOC100506476	100506476	27.1769	0	0.52594	0.001	-9.03875	1.02022e-08	2.02727e-08	uncharacterized LOC100506476	Downregulated
OLFML3	56944	50.9408	0	0.525384	0.001	-9.03723	1.57445e-15	4.23333e-15	olfactomedin-like 3	Downregulated
GTF2H4	2968	47.6602	0	0.525291	0.001	-9.03697	1.21785e-14	3.16262e-14	general transcription factor IIH, polypeptide 4, 52kDa	Downregulated
PIP4K2C	79837	80.7069	0	0.52312	0.001	-9.031	2.05344e-24	7.56139e-24	phosphatidylinositol-5-phosphate 4-kinase, type II, gamma	Downregulated
TMEM63B	55362	88.132	0	0.522126	0.001	-9.02825	8.77492e-27	3.47066e-26	transmembrane protein 63B	Downregulated
HSP90B2P	7190	75.3499	0	0.521969	0.001	-9.02782	6.21238e-23	2.17171e-22	heat shock protein 90kDa beta (Grp94), member 2, pseudogene	Downregulated
POLR2H	5437	31.9239	0	0.520062	0.001	-9.02254	6.66918e-10	1.40448e-09	polymerase (RNA) II (DNA directed) polypeptide H	Downregulated
EPC1	80314	101.255	0	0.519749	0.001	-9.02167	1.23945e-30	5.55141e-30	enhancer of polycomb homolog 1 (Drosophila)	Downregulated
CDC14B	8555	140.236	0	0.519539	0.001	-9.02109	3.49292e-42	2.14323e-41	cell division cycle 14B	Downregulated
VIPAS39	63894	66.0027	0	0.517589	0.001	-9.01566	2.8751e-20	9.22614e-20	VPS33B interacting protein, apical-basolateral polarity regulator, spe-39 homolog	Downregulated
ZMAT3	64393	245.039	0	0.5171	0.001	-9.0143	2.79848e-73	3.54101e-72	zinc finger, matrin-type 3	Downregulated
ATP5O	539	21.7599	0	0.516622	0.001	-9.01297	6.1041e-07	1.10057e-06	ATP synthase, H+ transporting, mitochondrial F1 complex, O subunit	Downregulated
FNDC3B	64778	188.771	0	0.515564	0.001	-9.01001	2.12694e-56	1.85209e-55	fibronectin type III domain containing 3B	Downregulated
MTIF2	4528	80.1208	0	0.514917	0.001	-9.0082	2.05344e-24	7.55444e-24	mitochondrial translational initiation factor 2	Downregulated
LRRC31	79782	64.0568	0	0.514684	0.001	-9.00754	1.1245e-19	3.51917e-19	leucine rich repeat containing 31	Downregulated
ROMO1	140823	12.4962	0	0.514683	0.001	-9.00754	0.000282498	0.000425252	reactive oxygen species modulator 1	Downregulated
FOXC1	2296	93.2526	0	0.514344	0.001	-9.00659	2.90048e-28	1.20599e-27	forkhead box C1	Downregulated
WBP2	23558	52.2348	0	0.513568	0.001	-9.00441	4.0255e-16	1.10462e-15	WW domain binding protein 2	Downregulated
SSU72	29101	35.2215	0	0.512526	0.001	-9.00148	4.35966e-11	9.66952e-11	SSU72 RNA polymerase II CTD phosphatase homolog (S. cerevisiae)	Downregulated
AGFG2	3268	129.88	0	0.512221	0.001	-9.00062	6.32256e-39	3.56941e-38	ArfGAP with FG repeats 2	Downregulated
INO80	54617	167.745	0	0.511937	0.001	-8.99982	3.52376e-50	2.66793e-49	INO80 complex subunit	Downregulated
NGLY1	55768	64.9043	0	0.511516	0.001	-8.99864	1.1245e-19	3.52744e-19	N-glycanase 1	Downregulated
FIGN	55137	121.652	0	0.510143	0.001	-8.99476	1.47956e-36	7.86478e-36	fidgetin	Downregulated
RNMT	8731	166.25	0	0.509182	0.001	-8.99204	6.96884e-50	5.22033e-49	RNA (guanine-7-) methyltransferase	Downregulated
TRIB3	57761	68.1755	0	0.509129	0.001	-8.99189	7.35092e-21	2.39343e-20	tribbles pseudokinase 3	Downregulated
CHORDC1	26973	89.3704	0	0.509086	0.001	-8.99177	4.437e-27	1.77303e-26	cysteine and histidine-rich domain (CHORD) containing 1	Downregulated
INADL	10207	227.706	0	0.508264	0.001	-8.98943	5.99394e-68	6.7519e-67	InaD-like (Drosophila)	Downregulated
AMMECR1	9949	142.212	0	0.508081	0.001	-8.98891	8.93056e-43	5.55926e-42	Alport syndrome, mental retardation, midface hypoplasia and elliptocytosis chromosomal region gene 1	Downregulated
COG1	9382	80.8199	0	0.507363	0.001	-8.98687	2.05344e-24	7.54751e-24	component of oligomeric golgi complex 1	Downregulated
NCKIPSD	51517	79.2646	0	0.507007	0.001	-8.98586	4.06104e-24	1.47371e-23	NCK interacting protein with SH3 domain	Downregulated
CHMP1B	57132	81.4116	0	0.506879	0.001	-8.9855	1.03831e-24	3.84579e-24	charged multivesicular body protein 1B	Downregulated
HDDC2	51020	42.7297	0	0.506609	0.001	-8.98473	3.68442e-13	8.99604e-13	HD domain containing 2	Downregulated
ITGB6	3694	116.351	0	0.506174	0.001	-8.98349	4.47616e-35	2.29112e-34	integrin, beta 6	Downregulated
KRTAP4-12	83755	28.3165	0	0.50612	0.001	-8.98334	5.15868e-09	1.03918e-08	keratin associated protein 4-12	Downregulated
DHCR24	1718	113.767	0	0.504903	0.001	-8.97986	3.46236e-34	1.72586e-33	24-dehydrocholesterol reductase	Downregulated
TTC23	64927	104.34	0	0.504809	0.001	-8.97959	1.60238e-31	7.39768e-31	tetratricopeptide repeat domain 23	Downregulated
PPP3R1	5534	82.4114	0	0.504646	0.001	-8.97913	5.25016e-25	1.96399e-24	protein phosphatase 3, regulatory subunit B, alpha	Downregulated
HNRNPU-AS1	284702	134.655	0	0.503989	0.001	-8.97725	2.08986e-40	1.22955e-39	HNRNPU antisense RNA 1	Downregulated
RGS19	10287	39.2448	0	0.503751	0.001	-8.97657	2.84992e-12	6.65924e-12	regulator of G-protein signaling 19	Downregulated
HEATR3	55027	69.3352	0	0.503693	0.001	-8.9764	3.71696e-21	1.22383e-20	HEAT repeat containing 3	Downregulated
TMEM184B	25829	95.9695	0	0.503391	0.001	-8.97554	7.41582e-29	3.1455e-28	transmembrane protein 184B	Downregulated
GGACT	87769	70.1793	0	0.502503	0.001	-8.97299	1.87945e-21	6.25166e-21	gamma-glutamylamine cyclotransferase	Downregulated
AGTPBP1	23287	115.409	0	0.502193	0.001	-8.9721	8.8524e-35	4.4966e-34	ATP/GTP binding protein 1	Downregulated
NAB1	4664	118.662	0	0.501601	0.001	-8.9704	1.14445e-35	5.97502e-35	NGFI-A binding protein 1 (EGR1 binding protein 1)	Downregulated
CTDSPL2	51496	128.525	0	0.501243	0.001	-8.96937	1.2504e-38	7.01624e-38	CTD (carboxy-terminal domain, RNA polymerase II, polypeptide A) small phosphatase like 2	Downregulated
DMPK	1760	71.5215	0	0.500944	0.001	-8.96851	9.50336e-22	3.19743e-21	dystrophia myotonica-protein kinase	Downregulated
C19orf80	55908	23.0223	0	0.500784	0.001	-8.96804	1.56067e-07	2.91003e-07	chromosome 19 open reading frame 80	Downregulated
ETAA1	54465	86.5977	0	0.500057	0.001	-8.96595	3.43204e-26	1.33458e-25	Ewing tumor-associated antigen 1	Downregulated
LAP3	51056	54.9553	0	0.49985	0.001	-8.96535	1.02922e-16	2.90593e-16	leucine aminopeptidase 3	Downregulated
TNFRSF10D	8793	93.6722	0	0.49964	0.001	-8.96475	2.90048e-28	1.20808e-27	tumor necrosis factor receptor superfamily, member 10d, decoy with truncated death domain	Downregulated
NASP	4678	59.7267	0	0.499156	0.001	-8.96335	3.40202e-18	1.01243e-17	nuclear autoantigenic sperm protein (histone-binding)	Downregulated
TRIP4	9325	53.6575	0	0.498333	0.001	-8.96097	2.03548e-16	5.67101e-16	thyroid hormone receptor interactor 4	Downregulated
HNRNPA1P33	728643	13.8074	0	0.498279	0.001	-8.96081	0.000142844	0.000220217	heterogeneous nuclear ribonucleoprotein A1 pseudogene 33	Downregulated
UBA6	55236	169.279	0	0.497623	0.001	-8.95891	9.00942e-51	6.9305e-50	ubiquitin-like modifier activating enzyme 6	Downregulated
USP28	57646	114.155	0	0.496737	0.001	-8.95634	1.75072e-34	8.81452e-34	ubiquitin specific peptidase 28	Downregulated
STX7	8417	111.485	0	0.496637	0.001	-8.95605	1.35419e-33	6.66441e-33	syntaxin 7	Downregulated
C19orf55	148137	55.7918	0	0.496494	0.001	-8.95563	5.20422e-17	1.47981e-16	proline and serine rich 3	Downregulated
PIGU	128869	47.5805	0	0.496401	0.001	-8.95536	1.21785e-14	3.16126e-14	phosphatidylinositol glycan anchor biosynthesis, class U	Downregulated
SATB2	23314	149.313	0	0.495169	0.001	-8.95178	7.54734e-45	5.00157e-44	SATB homeobox 2	Downregulated
ATPAF2	91647	40.1105	0	0.495074	0.001	-8.9515	1.44105e-12	3.41709e-12	ATP synthase mitochondrial F1 complex assembly factor 2	Downregulated
RDX	5962	65.1631	0	0.495022	0.001	-8.95135	5.686e-20	1.80247e-19	radixin	Downregulated
ADPRM	56985	39.124	0	0.493835	0.001	-8.94789	2.84992e-12	6.65018e-12	ADP-ribose/CDP-alcohol diphosphatase, manganese-dependent	Downregulated
NFATC3	4775	164.988	0	0.493663	0.001	-8.94738	2.72566e-49	2.01911e-48	nuclear factor of activated T-cells, cytoplasmic, calcineurin-dependent 3	Downregulated
RCAN3	11123	56.5094	0	0.493379	0.001	-8.94655	2.63148e-17	7.58129e-17	RCAN family member 3	Downregulated
LINC00568	100874054	14.294	0	0.493287	0.001	-8.94628	7.22282e-05	0.000114331	focally amplified long non-coding RNA in epithelial cancer	Downregulated
NR6A1	2649	182.924	0	0.492846	0.001	-8.94499	1.27257e-54	1.06637e-53	nuclear receptor subfamily 6, group A, member 1	Downregulated
ACVR1	90	79.116	0	0.492263	0.001	-8.94329	4.06104e-24	1.47817e-23	activin A receptor, type I	Downregulated
DUSP6	1848	87.7619	0	0.492228	0.001	-8.94318	1.7354e-26	6.81669e-26	dual specificity phosphatase 6	Downregulated
IPPK	64768	113.875	0	0.492129	0.001	-8.94289	3.46236e-34	1.73017e-33	inositol 1,3,4,5,6-pentakisphosphate 2-kinase	Downregulated
SHANK2-AS1	100874198	58.009	0	0.491742	0.001	-8.94176	6.72808e-18	1.98162e-17	SHANK2 antisense RNA 1	Downregulated
JAKMIP2	9832	232.889	0	0.49146	0.001	-8.94093	1.98124e-69	2.30085e-68	janus kinase and microtubule interacting protein 2	Downregulated
ZNF767	79970	59.6443	0	0.491157	0.001	-8.94004	3.40202e-18	1.01444e-17	zinc finger family member 767, pseudogene	Downregulated
APOC1P1	342	23.8978	0	0.491074	0.001	-8.9398	1.56067e-07	2.90732e-07	apolipoprotein C-I pseudogene 1	Downregulated
MAP3K7	6885	131.401	0	0.490644	0.001	-8.93853	1.61653e-39	9.2788e-39	mitogen-activated protein kinase kinase kinase 7	Downregulated
RCC1	1104	65.2964	0	0.490334	0.001	-8.93762	5.686e-20	1.79725e-19	regulator of chromosome condensation 1	Downregulated
ZC3H13	23091	165.11	0	0.489238	0.001	-8.93439	1.37821e-49	1.02665e-48	zinc finger CCCH-type containing 13	Downregulated
ATRIP	84126	65.1823	0	0.48793	0.001	-8.93053	5.686e-20	1.79678e-19	ATR interacting protein	Downregulated
MARCH8	220972	123.362	0	0.48743	0.001	-8.92905	3.78288e-37	2.04157e-36	membrane-associated ring finger (C3HC4) 8, E3 ubiquitin protein ligase	Downregulated
FAM83G	644815	74.9175	0	0.487262	0.001	-8.92855	1.2286e-22	4.25161e-22	family with sequence similarity 83, member G	Downregulated
CENPA	1058	34.3142	0	0.486981	0.001	-8.92772	8.622e-11	1.89343e-10	centromere protein A	Downregulated
ITGB2-AS1	100505746	58.3043	0	0.486625	0.001	-8.92667	6.72808e-18	1.97871e-17	ITGB2 antisense RNA 1	Downregulated
PEX3	8504	70.7959	0	0.486509	0.001	-8.92632	1.87945e-21	6.27251e-21	peroxisomal biogenesis factor 3	Downregulated
MAP3K11	4296	91.269	0	0.486137	0.001	-8.92522	1.13443e-27	4.62086e-27	mitogen-activated protein kinase kinase kinase 11	Downregulated
RFC5	5985	58.7924	0	0.485963	0.001	-8.9247	6.72808e-18	1.98065e-17	replication factor C (activator 1) 5, 36.5kDa	Downregulated
POLR2I	5438	22.262	0	0.485919	0.001	-8.92457	3.0865e-07	5.65325e-07	polymerase (RNA) II (DNA directed) polypeptide I, 14.5kDa	Downregulated
EML1	2009	114.4	0	0.485755	0.001	-8.92409	1.75072e-34	8.82191e-34	echinoderm microtubule associated protein like 1	Downregulated
SDAD1	55153	74.7605	0	0.485741	0.001	-8.92404	1.2286e-22	4.23574e-22	SDA1 domain containing 1	Downregulated
TRIT1	54802	54.514	0	0.485124	0.001	-8.92221	1.02922e-16	2.89572e-16	tRNA isopentenyltransferase 1	Downregulated
TRMT61A	115708	82.9412	0	0.485004	0.001	-8.92185	5.25016e-25	1.96582e-24	tRNA methyltransferase 61A	Downregulated
KIAA1328	57536	124.355	0	0.484982	0.001	-8.92179	1.91279e-37	1.0379e-36	KIAA1328	Downregulated
POMP	51371	37.2308	0	0.483136	0.001	-8.91629	1.11466e-11	2.53454e-11	proteasome maturation protein	Downregulated
ERGIC2	51290	44.9778	0	0.483081	0.001	-8.91612	9.42018e-14	2.35907e-13	ERGIC and golgi 2	Downregulated
ADH4	127	50.0494	0	0.483057	0.001	-8.91605	1.57445e-15	4.23143e-15	alcohol dehydrogenase 4 (class II), pi polypeptide	Downregulated
PTDSS1	9791	60.7178	0	0.481526	0.001	-8.91147	1.72021e-18	5.17053e-18	phosphatidylserine synthase 1	Downregulated
NUPL1	9818	108.725	0	0.481063	0.001	-8.91008	1.04748e-32	5.01321e-32	nucleoporin like 1	Downregulated
PI4K2A	55361	106.082	0	0.480017	0.001	-8.90694	4.0969e-32	1.92773e-31	phosphatidylinositol 4-kinase type 2 alpha	Downregulated
NRP2	8828	166.72	0	0.479461	0.001	-8.90527	6.96884e-50	5.23666e-49	neuropilin 2	Downregulated
FOXRED1	55572	47.4177	0	0.479373	0.001	-8.905	1.21785e-14	3.15716e-14	FAD-dependent oxidoreductase domain containing 1	Downregulated
LINC00607	646324	92.8734	0	0.47906	0.001	-8.90406	5.7362e-28	2.35488e-27	long intergenic non-protein coding RNA 607	Downregulated
CTDSPL	10217	111.293	0	0.478675	0.001	-8.9029	1.35419e-33	6.65078e-33	CTD (carboxy-terminal domain, RNA polymerase II, polypeptide A) small phosphatase-like	Downregulated
XAB2	56949	67.2492	0	0.47809	0.001	-8.90114	1.45377e-20	4.70409e-20	XPA binding protein 2	Downregulated
LYAR	55646	37.0395	0	0.477709	0.001	-8.89999	1.11466e-11	2.53742e-11	Ly1 antibody reactive	Downregulated
RICTOR	253260	237.353	0	0.477177	0.001	-8.89838	6.54882e-71	7.86382e-70	RPTOR independent companion of MTOR, complex 2	Downregulated
PALM	5064	72.2157	0	0.476229	0.001	-8.89551	4.80532e-22	1.62771e-21	paralemmin	Downregulated
TMEM237	65062	135.675	0	0.475142	0.001	-8.89221	1.05673e-40	6.27556e-40	transmembrane protein 237	Downregulated
MTUS1	57509	91.492	0	0.474909	0.001	-8.89151	1.13443e-27	4.61772e-27	microtubule associated tumor suppressor 1	Downregulated
PGAP3	93210	56.0263	0	0.47451	0.001	-8.89029	2.63148e-17	7.58311e-17	post-GPI attachment to proteins 3	Downregulated
HSD17B2	3294	35.8928	0	0.474217	0.001	-8.8894	4.35966e-11	9.68742e-11	hydroxysteroid (17-beta) dehydrogenase 2	Downregulated
RDH11	51109	58.6385	0	0.473358	0.001	-8.88679	6.72808e-18	1.98747e-17	retinol dehydrogenase 11 (all-trans/9-cis/11-cis)	Downregulated
POU4F1	5457	94.8411	0	0.47286	0.001	-8.88527	1.46661e-28	6.17065e-28	POU class 4 homeobox 1	Downregulated
B3GALT4	8705	42.0378	0	0.472111	0.001	-8.88298	3.68442e-13	9.00519e-13	UDP-Gal:betaGlcNAc beta 1,3-galactosyltransferase, polypeptide 4	Downregulated
C11orf68	83638	38.6208	0	0.471769	0.001	-8.88194	5.63624e-12	1.2973e-11	chromosome 11 open reading frame 68	Downregulated
UBE2C	11065	21.0837	0	0.47161	0.001	-8.88145	6.1041e-07	1.10024e-06	ubiquitin-conjugating enzyme E2C	Downregulated
VEGFC	7424	51.8858	0	0.471253	0.001	-8.88036	7.96114e-16	2.16382e-15	vascular endothelial growth factor C	Downregulated
ZBTB5	9925	115.338	0	0.471253	0.001	-8.88036	8.8524e-35	4.48522e-34	zinc finger and BTB domain containing 5	Downregulated
TIMM21	29090	38.3418	0	0.47018	0.001	-8.87707	5.63624e-12	1.29879e-11	translocase of inner mitochondrial membrane 21 homolog (yeast)	Downregulated
CXCL17	284340	21.1465	0	0.469688	0.001	-8.87556	6.1041e-07	1.10206e-06	chemokine (C-X-C motif) ligand 17	Downregulated
MPP3	4356	69.5569	0	0.468479	0.001	-8.87184	3.71696e-21	1.22619e-20	membrane protein, palmitoylated 3 (MAGUK p55 subfamily member 3)	Downregulated
ATP11C	286410	148.462	0	0.468327	0.001	-8.87137	1.49262e-44	9.7835e-44	ATPase, class VI, type 11C	Downregulated
RILPL2	196383	40.7977	0	0.467892	0.001	-8.87003	1.44105e-12	3.42724e-12	Rab interacting lysosomal protein-like 2	Downregulated
GFOD1	54438	81.6036	0	0.467373	0.001	-8.86843	1.03831e-24	3.8553e-24	glucose-fructose oxidoreductase domain containing 1	Downregulated
FUT8	2530	104.707	0	0.467322	0.001	-8.86827	1.60238e-31	7.41192e-31	fucosyltransferase 8 (alpha (1,6) fucosyltransferase)	Downregulated
PROCR	10544	36.7266	0	0.46731	0.001	-8.86824	2.20444e-11	4.97106e-11	protein C receptor, endothelial	Downregulated
LRRC8B	23507	191.11	0	0.46726	0.001	-8.86808	2.74972e-57	2.43321e-56	leucine rich repeat containing 8 family, member B	Downregulated
TUBA3C	7278	38.1017	0	0.466631	0.001	-8.86614	5.63624e-12	1.30004e-11	tubulin, alpha 3c	Downregulated
HSD17B13	345275	55.9458	0	0.466529	0.001	-8.86582	5.20422e-17	1.47911e-16	hydroxysteroid (17-beta) dehydrogenase 13	Downregulated
CDKN2B-AS1	100048912	64.9825	0	0.466294	0.001	-8.86509	1.1245e-19	3.52836e-19	CDKN2B antisense RNA 1	Downregulated
LOC729852	729852	57.8844	0	0.465487	0.001	-8.8626	1.33059e-17	3.8734e-17	UBAP1-MVB12-associated (UMA) domain containing 1	Downregulated
SEC23IP	11196	165.885	0	0.465197	0.001	-8.8617	1.37821e-49	1.02474e-48	SEC23 interacting protein	Downregulated
PCF11	51585	145.122	0	0.464835	0.001	-8.86057	1.15455e-43	7.33927e-43	PCF11 cleavage and polyadenylation factor subunit	Downregulated
IRGM	345611	40.2501	0	0.464423	0.001	-8.8593	1.44105e-12	3.42114e-12	immunity-related GTPase family, M	Downregulated
-	101928597	27.762	0	0.463829	0.001	-8.85745	1.02022e-08	2.02794e-08	uncharacterized LOC101928597	Downregulated
RAB6B	51560	135.682	0	0.463681	0.001	-8.85699	1.05673e-40	6.29736e-40	RAB6B, member RAS oncogene family	Downregulated
PRKAG2	51422	54.0703	0	0.462306	0.001	-8.8527	1.02922e-16	2.90867e-16	protein kinase, AMP-activated, gamma 2 non-catalytic subunit	Downregulated
PSEN1	5663	148.288	0	0.462236	0.001	-8.85249	1.49262e-44	9.78885e-44	presenilin 1	Downregulated
-	101928414	15.9763	0	0.46212	0.001	-8.85212	3.65218e-05	5.88742e-05	uncharacterized LOC101928414	Downregulated
TNXA	7146	67.4345	0	0.461902	0.001	-8.85144	1.45377e-20	4.70283e-20	tenascin XA (pseudogene)	Downregulated
USP48	84196	58.5376	0	0.461339	0.001	-8.84968	6.72808e-18	1.98017e-17	ubiquitin specific peptidase 48	Downregulated
AMOT	154796	168.692	0	0.461324	0.001	-8.84964	1.78177e-50	1.35844e-49	angiomotin	Downregulated
CARKD	55739	56.3297	0	0.461205	0.001	-8.84926	2.63148e-17	7.58675e-17	carbohydrate kinase domain containing	Downregulated
FGFRL1	53834	75.1221	0	0.460904	0.001	-8.84832	6.21238e-23	2.16918e-22	fibroblast growth factor receptor-like 1	Downregulated
CSNK2A1	1457	60.853	0	0.46025	0.001	-8.84627	1.72021e-18	5.16923e-18	casein kinase 2, alpha 1 polypeptide	Downregulated
SNX25	83891	78.1544	0	0.459851	0.001	-8.84502	8.03142e-24	2.88056e-23	sorting nexin 25	Downregulated
MRE11A	4361	124.222	0	0.459314	0.001	-8.84334	1.91279e-37	1.03931e-36	MRE11 meiotic recombination 11 homolog A (S. cerevisiae)	Downregulated
CCT6P1	643253	42.7842	0	0.458999	0.001	-8.84235	3.68442e-13	9.01437e-13	chaperonin containing TCP1, subunit 6 (zeta) pseudogene 1	Downregulated
ACSF3	197322	86.2616	0	0.45895	0.001	-8.84219	3.43204e-26	1.33286e-25	acyl-CoA synthetase family member 3	Downregulated
RER1	11079	75.0783	0	0.458704	0.001	-8.84142	6.21238e-23	2.17424e-22	retention in endoplasmic reticulum sorting receptor 1	Downregulated
SLC6A7	6534	90.5206	0	0.458682	0.001	-8.84135	2.24354e-27	9.04041e-27	solute carrier family 6 (neurotransmitter transporter), member 7	Downregulated
GGNBP2	79893	68.9101	0	0.457776	0.001	-8.8385	7.35092e-21	2.40321e-20	gametogenetin binding protein 2	Downregulated
ADSSL1	122622	42.2863	0	0.457283	0.001	-8.83694	3.68442e-13	9.0162e-13	adenylosuccinate synthase like 1	Downregulated
ZCCHC2	54877	133.725	0	0.457158	0.001	-8.83655	4.13308e-40	2.42098e-39	zinc finger, CCHC domain containing 2	Downregulated
EIF2S2	8894	61.7881	0	0.454618	0.001	-8.82851	8.69814e-19	2.63822e-18	eukaryotic translation initiation factor 2, subunit 2 beta, 38kDa	Downregulated
PDZK1IP1	10158	20.9708	0	0.453038	0.001	-8.82349	1.20719e-06	2.14121e-06	PDZK1 interacting protein 1	Downregulated
KIAA1143	57456	122.854	0	0.45284	0.001	-8.82286	7.4813e-37	3.99624e-36	KIAA1143	Downregulated
SLC34A2	10568	99.0511	0	0.452517	0.001	-8.82183	4.84774e-30	2.13464e-29	solute carrier family 34 (type II sodium/phosphate cotransporter), member 2	Downregulated
MFGE8	4240	43.6882	0	0.451813	0.001	-8.81958	1.86301e-13	4.61638e-13	milk fat globule-EGF factor 8 protein	Downregulated
TMEM86B	255043	41.3254	0	0.451531	0.001	-8.81868	7.28658e-13	1.75662e-12	transmembrane protein 86B	Downregulated
LOH12CR2	503693	36.2489	0	0.451529	0.001	-8.81867	2.20444e-11	4.96454e-11	loss of heterozygosity, 12, chromosomal region 2 (non-protein coding)	Downregulated
SEP15	9403	42.4994	0	0.451344	0.001	-8.81808	3.68442e-13	9.03093e-13	15 kDa selenoprotein	Downregulated
EXOC2	55770	106.539	0	0.451264	0.001	-8.81783	4.0969e-32	1.93e-31	exocyst complex component 2	Downregulated
PDE4DIP	9659	135.034	0	0.451131	0.001	-8.8174	1.05673e-40	6.28489e-40	phosphodiesterase 4D interacting protein	Downregulated
DDX47	51202	39.7679	0	0.450625	0.001	-8.81578	2.84992e-12	6.6476e-12	DEAD (Asp-Glu-Ala-Asp) box polypeptide 47	Downregulated
TBC1D20	128637	48.7511	0	0.450558	0.001	-8.81557	6.158e-15	1.62125e-14	TBC1 domain family, member 20	Downregulated
GSTT2B	653689	25.9392	0	0.450455	0.001	-8.81524	3.99028e-08	7.68119e-08	glutathione S-transferase theta 2B (gene/pseudogene)	Downregulated
ITFG1	81533	72.6687	0	0.449784	0.001	-8.81309	4.80532e-22	1.62863e-21	integrin alpha FG-GAP repeat containing 1	Downregulated
CDRT1	374286	65.3957	0	0.448423	0.001	-8.80872	5.686e-20	1.80057e-19	CMT1A duplicated region transcript 1	Downregulated
C1orf123	54987	23.2341	0	0.448264	0.001	-8.8082	1.56067e-07	2.91682e-07	chromosome 1 open reading frame 123	Downregulated
BIK	638	22.4281	0	0.447761	0.001	-8.80659	3.0865e-07	5.66102e-07	BCL2-interacting killer (apoptosis-inducing)	Downregulated
TEX2	55852	120.295	0	0.447501	0.001	-8.80575	2.92608e-36	1.54175e-35	testis expressed 2	Downregulated
DCAF15	90379	53.2156	0	0.446711	0.001	-8.8032	2.03548e-16	5.66575e-16	DDB1 and CUL4 associated factor 15	Downregulated
MICU1	10367	43.2111	0	0.446635	0.001	-8.80295	1.86301e-13	4.62401e-13	mitochondrial calcium uptake 1	Downregulated
CCDC126	90693	57.8781	0	0.446484	0.001	-8.80246	1.33059e-17	3.86684e-17	coiled-coil domain containing 126	Downregulated
THAP2	83591	113.603	0	0.446266	0.001	-8.80176	3.46236e-34	1.72658e-33	THAP domain containing, apoptosis associated protein 2	Downregulated
TUBGCP6	85378	141.748	0	0.445887	0.001	-8.80053	1.76617e-42	1.09096e-41	tubulin, gamma complex associated protein 6	Downregulated
TMED3	23423	34.7169	0	0.445027	0.001	-8.79775	8.622e-11	1.88894e-10	transmembrane emp24 protein transport domain containing 3	Downregulated
PRKCI	5584	114.285	0	0.444883	0.001	-8.79728	1.75072e-34	8.80713e-34	protein kinase C, iota	Downregulated
KDM5B	10765	149.656	0	0.444698	0.001	-8.79668	7.54734e-45	4.99881e-44	lysine (K)-specific demethylase 5B	Downregulated
LOC649395	649395	42.4732	0	0.444341	0.001	-8.79552	3.68442e-13	9.01253e-13	tyrosine 3-monooxygenase/tryptophan 5-monooxygenase activation protein, epsilon pseudogene 1	Downregulated
ASB7	140460	115.974	0	0.443264	0.001	-8.79202	8.8524e-35	4.50231e-34	ankyrin repeat and SOCS box containing 7	Downregulated
WDR62	284403	110.195	0	0.442886	0.001	-8.79079	2.67816e-33	1.30411e-32	WD repeat domain 62	Downregulated
ZDHHC9	51114	107.479	0	0.442484	0.001	-8.78948	2.07158e-32	9.83611e-32	zinc finger, DHHC-type containing 9	Downregulated
HPRT1	3251	33.0958	0	0.442198	0.001	-8.78855	1.70515e-10	3.67933e-10	hypoxanthine phosphoribosyltransferase 1	Downregulated
MLLT11	10962	50.388	0	0.441357	0.001	-8.7858	1.57445e-15	4.22859e-15	myeloid/lymphoid or mixed-lineage leukemia (trithorax homolog, Drosophila); translocated to, 11	Downregulated
BIRC3	330	146.533	0	0.440455	0.001	-8.78285	5.83794e-44	3.74476e-43	baculoviral IAP repeat containing 3	Downregulated
LOC100131626	100131626	11.6548	0	0.439866	0.001	-8.78092	0.00055869	0.000824069	uncharacterized LOC100131626	Downregulated
NEGR1	257194	130.34	0	0.436914	0.001	-8.77121	3.19696e-39	1.82544e-38	neuronal growth regulator 1	Downregulated
PWP1	11137	42.2046	0	0.435519	0.001	-8.76659	3.68442e-13	8.99787e-13	PWP1 homolog (S. cerevisiae)	Downregulated
ZW10	9183	67.6344	0	0.434818	0.001	-8.76427	1.45377e-20	4.70663e-20	zw10 kinetochore protein	Downregulated
TMEM79	84283	50.4414	0	0.43479	0.001	-8.76417	1.57445e-15	4.23997e-15	transmembrane protein 79	Downregulated
TPCN2	219931	114.855	0	0.434428	0.001	-8.76297	1.75072e-34	8.7924e-34	two pore segment channel 2	Downregulated
SGPL1	8879	132.071	0	0.433962	0.001	-8.76142	8.17388e-40	4.73935e-39	sphingosine-1-phosphate lyase 1	Downregulated
DYRK1A	1859	124.1	0	0.433788	0.001	-8.76085	1.91279e-37	1.03743e-36	dual-specificity tyrosine-(Y)-phosphorylation regulated kinase 1A	Downregulated
PKDREJ	10343	174.908	0	0.433576	0.001	-8.76014	2.97798e-52	2.3808e-51	polycystin (PKD) family receptor for egg jelly	Downregulated
FAXC	84553	222.826	0	0.432726	0.001	-8.75731	1.81337e-66	1.96348e-65	failed axon connections homolog (Drosophila)	Downregulated
HLA-F-AS1	285830	31.2483	0	0.432346	0.001	-8.75604	6.66918e-10	1.4035e-09	HLA-F antisense RNA 1	Downregulated
RPRD1A	55197	40.3149	0	0.432263	0.001	-8.75577	1.44105e-12	3.42928e-12	regulation of nuclear pre-mRNA domain containing 1A	Downregulated
GPX3	2878	40.1831	0	0.432073	0.001	-8.75513	1.44105e-12	3.41372e-12	glutathione peroxidase 3	Downregulated
CHIC1	53344	155.776	0	0.431547	0.001	-8.75337	1.26144e-46	8.72039e-46	cysteine-rich hydrophobic domain 1	Downregulated
GOPC	57120	104.714	0	0.431382	0.001	-8.75282	1.60238e-31	7.38065e-31	golgi-associated PDZ and coiled-coil motif containing	Downregulated
TREX2	11219	28.1752	0	0.431187	0.001	-8.75217	5.15868e-09	1.04057e-08	three prime repair exonuclease 2	Downregulated
GPR21	2844	35.8594	0	0.430543	0.001	-8.75001	4.35966e-11	9.68562e-11	G protein-coupled receptor 21	Downregulated
USP15	9958	187.611	0	0.43017	0.001	-8.74876	4.20638e-56	3.61562e-55	ubiquitin specific peptidase 15	Downregulated
ERAP1	51752	115.034	0	0.430042	0.001	-8.74833	8.8524e-35	4.50041e-34	endoplasmic reticulum aminopeptidase 1	Downregulated
COL16A1	1307	126.134	0	0.429269	0.001	-8.74574	4.89054e-38	2.70003e-37	collagen, type XVI, alpha 1	Downregulated
TRMU	55687	38.6567	0	0.428801	0.001	-8.74416	5.63624e-12	1.29655e-11	tRNA 5-methylaminomethyl-2-thiouridylate methyltransferase	Downregulated
FAM229A	100128071	15.7675	0	0.427371	0.001	-8.73935	3.65218e-05	5.89612e-05	family with sequence similarity 229, member A	Downregulated
CYP2D7P1	1564	37.8174	0	0.427246	0.001	-8.73892	1.11466e-11	2.5379e-11	cytochrome P450, family 2, subfamily D, polypeptide 7 (gene/pseudogene)	Downregulated
EIF2B3	8891	35.7943	0	0.426518	0.001	-8.73646	4.35966e-11	9.68025e-11	eukaryotic translation initiation factor 2B, subunit 3 gamma, 58kDa	Downregulated
KIF13A	63971	29.7405	0	0.4259	0.001	-8.73437	2.60846e-09	5.34968e-09	kinesin family member 13A	Downregulated
TMEM104	54868	106.46	0	0.424989	0.001	-8.73128	4.0969e-32	1.92546e-31	transmembrane protein 104	Downregulated
SWAP70	23075	105.175	0	0.424783	0.001	-8.73058	8.10234e-32	3.78572e-31	SWAP switching B-cell complex 70kDa subunit	Downregulated
R3HDM1	23518	96.8389	0	0.424605	0.001	-8.72998	3.74976e-29	1.60582e-28	R3H domain containing 1	Downregulated
PAMR1	25891	62.6199	0	0.423564	0.001	-8.72644	4.39816e-19	1.34521e-18	peptidase domain containing associated with muscle regeneration 1	Downregulated
-	101929369	22.0644	0	0.42354	0.001	-8.72635	3.0865e-07	5.65152e-07	small nucleolar RNA host gene 24	Downregulated
GLIS2	84662	82.1003	0	0.421768	0.001	-8.72031	5.25016e-25	1.9646e-24	GLIS family zinc finger 2	Downregulated
SPAG1	6674	83.064	0	0.420448	0.001	-8.71578	2.65472e-25	1.0034e-24	sperm associated antigen 1	Downregulated
LOC643037	643037	13.0217	0	0.420289	0.001	-8.71524	0.000142844	0.000220358	chromosome 11 open reading frame 97	Downregulated
TNK2	10188	94.7983	0	0.419272	0.001	-8.71174	1.46661e-28	6.16633e-28	tyrosine kinase, non-receptor, 2	Downregulated
KLF12	11278	241.307	0	0.419203	0.001	-8.71151	4.28098e-72	5.27782e-71	Kruppel-like factor 12	Downregulated
BZRAP1	9256	165.843	0	0.418887	0.001	-8.71042	1.37821e-49	1.02729e-48	benzodiazepine receptor (peripheral) associated protein 1	Downregulated
ZNF740	283337	93.7168	0	0.418864	0.001	-8.71034	2.90048e-28	1.20266e-27	zinc finger protein 740	Downregulated
LRFN1	57622	70.5571	0	0.418398	0.001	-8.70873	1.87945e-21	6.27425e-21	leucine rich repeat and fibronectin type III domain containing 1	Downregulated
-	101927111	50.4597	0	0.418387	0.001	-8.70869	1.57445e-15	4.24283e-15	SUCLG2 antisense RNA 1 (head to head)	Downregulated
RABAC1	10567	17.7444	0	0.418143	0.001	-8.70785	9.33774e-06	1.56515e-05	Rab acceptor 1 (prenylated)	Downregulated
NIN	51199	96.3033	0	0.417427	0.001	-8.70538	3.74976e-29	1.60467e-28	ninein (GSK3B interacting protein)	Downregulated
SELENBP1	8991	34.4777	0	0.417392	0.001	-8.70526	8.622e-11	1.88688e-10	selenium binding protein 1	Downregulated
GNAI1	2770	69.6755	0	0.417218	0.001	-8.70466	3.71696e-21	1.22787e-20	guanine nucleotide binding protein (G protein), alpha inhibiting activity polypeptide 1	Downregulated
GSTM5	2949	34.4725	0	0.417062	0.001	-8.70412	8.622e-11	1.88757e-10	glutathione S-transferase mu 5	Downregulated
-	101669764	81.1856	0	0.41673	0.001	-8.70297	1.03831e-24	3.85292e-24	GPR1 antisense RNA	Downregulated
ANKRD33B	651746	204.881	0	0.416669	0.001	-8.70276	3.88396e-61	3.73707e-60	ankyrin repeat domain 33B	Downregulated
MAP1LC3A	84557	21.9898	0	0.416514	0.001	-8.70222	6.1041e-07	1.10173e-06	microtubule-associated protein 1 light chain 3 alpha	Downregulated
PPT1	5538	47.8532	0	0.416267	0.001	-8.70137	1.21785e-14	3.1558e-14	palmitoyl-protein thioesterase 1	Downregulated
ELMO2	63916	78.5174	0	0.415646	0.001	-8.69921	8.03142e-24	2.88229e-23	engulfment and cell motility 2	Downregulated
SCRN2	90507	34.3309	0	0.415615	0.001	-8.6991	8.622e-11	1.8831e-10	secernin 2	Downregulated
PODXL2	50512	48.0204	0	0.415054	0.001	-8.69716	6.158e-15	1.6177e-14	podocalyxin-like 2	Downregulated
FAM155B	27112	88.3143	0	0.41488	0.001	-8.69655	8.77492e-27	3.4718e-26	family with sequence similarity 155, member B	Downregulated
KIAA0146	23514	60.6893	0	0.414202	0.001	-8.69419	1.72021e-18	5.17312e-18	scaffolding protein involved in DNA repair	Downregulated
TWISTNB	221830	84.6089	0	0.41368	0.001	-8.69237	1.34234e-25	5.12034e-25	TWIST neighbor	Downregulated
RREB1	6239	172.748	0	0.41335	0.001	-8.69122	1.16475e-51	9.17134e-51	ras responsive element binding protein 1	Downregulated
USP42	84132	111.447	0	0.412562	0.001	-8.68847	1.35419e-33	6.65623e-33	ubiquitin specific peptidase 42	Downregulated
WDHD1	11169	129.221	0	0.411883	0.001	-8.68609	6.32256e-39	3.5795e-38	WD repeat and HMG-box DNA binding protein 1	Downregulated
POLA2	23649	78.9563	0	0.411304	0.001	-8.68406	8.03142e-24	2.8866e-23	polymerase (DNA directed), alpha 2, accessory subunit	Downregulated
DENND4C	55667	168.516	0	0.411221	0.001	-8.68377	1.78177e-50	1.35931e-49	DENN/MADD domain containing 4C	Downregulated
MINPP1	9562	47.9048	0	0.411055	0.001	-8.68319	1.21785e-14	3.15512e-14	multiple inositol-polyphosphate phosphatase 1	Downregulated
APH1B	83464	88.1423	0	0.410812	0.001	-8.68233	8.77492e-27	3.47639e-26	APH1B gamma secretase subunit	Downregulated
SUCLG2	8801	32.5819	0	0.410711	0.001	-8.68198	3.37224e-10	7.20275e-10	succinate-CoA ligase, GDP-forming, beta subunit	Downregulated
NUDT22	84304	22.2138	0	0.4106	0.001	-8.68159	3.0865e-07	5.66708e-07	nudix (nucleoside diphosphate linked moiety X)-type motif 22	Downregulated
ABCA1	19	227.333	0	0.410275	0.001	-8.68045	5.99394e-68	6.74557e-67	ATP-binding cassette, sub-family A (ABC1), member 1	Downregulated
SLC28A3	64078	99.7758	0	0.410057	0.001	-8.67968	4.84774e-30	2.1323e-29	solute carrier family 28 (concentrative nucleoside transporter), member 3	Downregulated
UNC13D	201294	94.8625	0	0.409495	0.001	-8.6777	1.46661e-28	6.16417e-28	unc-13 homolog D (C. elegans)	Downregulated
TMEM131	23505	143.477	0	0.409387	0.001	-8.67732	4.51568e-43	2.83748e-42	transmembrane protein 131	Downregulated
ASTE1	28990	58.7456	0	0.409342	0.001	-8.67716	6.72808e-18	1.98357e-17	asteroid homolog 1 (Drosophila)	Downregulated
KIF27	55582	94.3235	0	0.407726	0.001	-8.67146	1.46661e-28	6.15555e-28	kinesin family member 27	Downregulated
MAN2C1	4123	65.4838	0	0.407521	0.001	-8.67073	5.686e-20	1.7963e-19	mannosidase, alpha, class 2C, member 1	Downregulated
ARL2BP	23568	44.7664	0	0.407177	0.001	-8.66951	9.42018e-14	2.35711e-13	ADP-ribosylation factor-like 2 binding protein	Downregulated
POLR1C	9533	28.6743	0	0.406636	0.001	-8.66759	5.15868e-09	1.03848e-08	polymerase (RNA) I polypeptide C, 30kDa	Downregulated
FAM178A	55719	89.1959	0	0.40662	0.001	-8.66754	4.437e-27	1.77598e-26	family with sequence similarity 178, member A	Downregulated
C5orf34	375444	54.1314	0	0.406491	0.001	-8.66708	1.02922e-16	2.90184e-16	chromosome 5 open reading frame 34	Downregulated
C14orf182	283551	83.48	0	0.40563	0.001	-8.66402	2.65472e-25	1.00119e-24	long intergenic non-protein coding RNA 1588	Downregulated
FAM89B	23625	30.1853	0	0.405311	0.001	-8.66289	1.31895e-09	2.74726e-09	family with sequence similarity 89, member B	Downregulated
ESF1	51575	68.1915	0	0.405258	0.001	-8.6627	7.35092e-21	2.39864e-20	ESF1, nucleolar pre-rRNA processing protein, homolog (S. cerevisiae)	Downregulated
MBD6	114785	89.6687	0	0.404782	0.001	-8.661	4.437e-27	1.77244e-26	methyl-CpG binding domain protein 6	Downregulated
EMX2OS	196047	154.824	0	0.403758	0.001	-8.65735	2.4947e-46	1.71571e-45	EMX2 opposite strand/antisense RNA	Downregulated
PIK3C2B	5287	161.583	0	0.403395	0.001	-8.65605	2.10832e-48	1.52602e-47	phosphatidylinositol-4-phosphate 3-kinase, catalytic subunit type 2 beta	Downregulated
CKMT2	1160	31.2734	0	0.403342	0.001	-8.65586	6.66918e-10	1.40473e-09	creatine kinase, mitochondrial 2 (sarcomeric)	Downregulated
SRGAP2D	100996712	64.3859	0	0.402727	0.001	-8.65366	1.1245e-19	3.52008e-19	SLIT-ROBO Rho GTPase activating protein 2D (pseudogene)	Downregulated
MRPS11	64963	29.4259	0	0.402532	0.001	-8.65296	2.60846e-09	5.33965e-09	mitochondrial ribosomal protein S11	Downregulated
VRK3	51231	44.8323	0	0.402177	0.001	-8.65169	9.42018e-14	2.36104e-13	vaccinia related kinase 3	Downregulated
NACC2	138151	146.045	0	0.402061	0.001	-8.65127	5.83794e-44	3.74677e-43	NACC family member 2, BEN and BTB (POZ) domain containing	Downregulated
RTN4R	65078	40.3981	0	0.401356	0.001	-8.64874	1.44105e-12	3.42182e-12	reticulon 4 receptor	Downregulated
RASL11A	387496	32.325	0	0.401332	0.001	-8.64865	3.37224e-10	7.19379e-10	RAS-like, family 11, member A	Downregulated
YIPF2	78992	38.4829	0	0.401045	0.001	-8.64762	5.63624e-12	1.29854e-11	Yip1 domain family, member 2	Downregulated
CYTH4	27128	65.9855	0	0.400566	0.001	-8.6459	5.686e-20	1.80294e-19	cytohesin 4	Downregulated
HS1BP3	64342	50.389	0	0.400115	0.001	-8.64427	1.57445e-15	4.2267e-15	HCLS1 binding protein 3	Downregulated
HUNK	30811	155.31	0	0.399365	0.001	-8.64156	1.26144e-46	8.74052e-46	hormonally up-regulated Neu-associated kinase	Downregulated
LOC100507006	100507006	16.075	0	0.399158	0.001	-8.64082	1.8467e-05	3.0323e-05	uncharacterized LOC100507006	Downregulated
-	101928567	19.6486	0	0.398996	0.001	-8.64023	2.38744e-06	4.15604e-06	uncharacterized LOC101928567	Downregulated
GID8	54994	93.1153	0	0.398863	0.001	-8.63975	2.90048e-28	1.20349e-27	GID complex subunit 8	Downregulated
LRIG3	121227	86.1189	0	0.398636	0.001	-8.63893	3.43204e-26	1.33545e-25	leucine-rich repeats and immunoglobulin-like domains 3	Downregulated
SLCO2A1	6578	88.7253	0	0.398624	0.001	-8.63888	8.77492e-27	3.48098e-26	solute carrier organic anion transporter family, member 2A1	Downregulated
C19orf71	100128569	13.7418	0	0.398094	0.001	-8.63697	0.000142844	0.000220245	chromosome 19 open reading frame 71	Downregulated
ERN2	10595	75.9841	0	0.39801	0.001	-8.63666	6.21238e-23	2.17361e-22	endoplasmic reticulum to nucleus signaling 2	Downregulated
KATNB1	10300	55.5047	0	0.397729	0.001	-8.63564	5.20422e-17	1.4872e-16	katanin p80 (WD repeat containing) subunit B 1	Downregulated
LRRC1	55227	66.2507	0	0.396836	0.001	-8.6324	2.8751e-20	9.23107e-20	leucine rich repeat containing 1	Downregulated
SUZ12	23512	93.2616	0	0.396175	0.001	-8.62999	2.90048e-28	1.20557e-27	SUZ12 polycomb repressive complex 2 subunit	Downregulated
SLC25A33	84275	30.4633	0	0.395587	0.001	-8.62785	1.31895e-09	2.74821e-09	solute carrier family 25 (pyrimidine nucleotide carrier), member 33	Downregulated
DMXL1	1657	266.678	0	0.395438	0.001	-8.62731	1.68916e-79	2.41182e-78	Dmx-like 1	Downregulated
SMC5	23137	124.129	0	0.395388	0.001	-8.62713	1.91279e-37	1.04119e-36	structural maintenance of chromosomes 5	Downregulated
ARSJ	79642	97.1837	0	0.394104	0.001	-8.62243	1.89605e-29	8.21347e-29	arylsulfatase family, member J	Downregulated
FAM114A2	10827	59.5588	0	0.39331	0.001	-8.61952	3.40202e-18	1.01168e-17	family with sequence similarity 114, member A2	Downregulated
RNASEH2B	79621	34.691	0	0.393051	0.001	-8.61857	8.622e-11	1.89101e-10	ribonuclease H2, subunit B	Downregulated
MANBA	4126	68.3316	0	0.393023	0.001	-8.61847	7.35092e-21	2.40059e-20	mannosidase, beta A, lysosomal	Downregulated
DYRK3	8444	45.4144	0	0.392889	0.001	-8.61798	4.76326e-14	1.2072e-13	dual-specificity tyrosine-(Y)-phosphorylation regulated kinase 3	Downregulated
LRRC8D	55144	78.0806	0	0.392746	0.001	-8.61745	8.03142e-24	2.88833e-23	leucine rich repeat containing 8 family, member D	Downregulated
C2CD2	25966	120.384	0	0.391153	0.001	-8.61159	2.92608e-36	1.54378e-35	C2 calcium-dependent domain containing 2	Downregulated
GLB1L2	89944	65.2013	0	0.390797	0.001	-8.61028	5.686e-20	1.80152e-19	galactosidase, beta 1-like 2	Downregulated
LOC143666	143666	42.4214	0	0.389966	0.001	-8.6072	3.68442e-13	9.02908e-13	uncharacterized LOC143666	Downregulated
LIN37	55957	23.8707	0	0.389205	0.001	-8.60439	1.56067e-07	2.91637e-07	lin-37 DREAM MuvB core complex component	Downregulated
FAR1	84188	108.323	0	0.38906	0.001	-8.60385	1.04748e-32	5.00922e-32	fatty acyl CoA reductase 1	Downregulated
KIAA0586	9786	105.51	0	0.388839	0.001	-8.60303	8.10234e-32	3.7769e-31	KIAA0586	Downregulated
FAM117B	150864	118.544	0	0.388706	0.001	-8.60254	1.14445e-35	5.97243e-35	family with sequence similarity 117, member B	Downregulated
SLC25A53	401612	127.566	0	0.388377	0.001	-8.60131	2.47288e-38	1.37537e-37	solute carrier family 25, member 53	Downregulated
PKI55	150967	68.1854	0	0.387244	0.001	-8.5971	7.35092e-21	2.39408e-20	DKFZp434H1419	Downregulated
SPTLC3	55304	78.3969	0	0.387002	0.001	-8.5962	8.03142e-24	2.87713e-23	serine palmitoyltransferase, long chain base subunit 3	Downregulated
RABGGTB	5876	30.8936	0	0.3866	0.001	-8.5947	1.31895e-09	2.73965e-09	Rab geranylgeranyltransferase, beta subunit	Downregulated
SMCO4	56935	19.6273	0	0.38655	0.001	-8.59451	2.38744e-06	4.14223e-06	single-pass membrane protein with coiled-coil domains 4	Downregulated
CCDC54	84692	26.0429	0	0.386383	0.001	-8.59389	2.01766e-08	3.95173e-08	coiled-coil domain containing 54	Downregulated
INTS9	55756	51.1984	0	0.385997	0.001	-8.59245	7.96114e-16	2.16186e-15	integrator complex subunit 9	Downregulated
CDK5RAP3	80279	40.1953	0	0.385007	0.001	-8.58874	1.44105e-12	3.42453e-12	CDK5 regulatory subunit associated protein 3	Downregulated
ATR	545	167.397	0	0.384846	0.001	-8.58814	3.52376e-50	2.66961e-49	ATR serine/threonine kinase	Downregulated
RNF19A	25897	88.1071	0	0.383745	0.001	-8.584	8.77492e-27	3.47524e-26	ring finger protein 19A, RBR E3 ubiquitin protein ligase	Downregulated
CERS5	91012	74.641	0	0.383656	0.001	-8.58367	1.2286e-22	4.23331e-22	ceramide synthase 5	Downregulated
GPN3	51184	30.1207	0	0.383515	0.001	-8.58314	1.31895e-09	2.74155e-09	GPN-loop GTPase 3	Downregulated
CENPJ	55835	101.098	0	0.381025	0.001	-8.57374	1.23945e-30	5.53284e-30	centromere protein J	Downregulated
CSRP2BP	57325	62.9923	0	0.380688	0.001	-8.57247	4.39816e-19	1.34899e-18	CSRP2 binding protein	Downregulated
CPNE7	27132	48.7754	0	0.379977	0.001	-8.56977	6.158e-15	1.61806e-14	copine VII	Downregulated
ZNF276	92822	92.0818	0	0.379646	0.001	-8.56851	5.7362e-28	2.35408e-27	zinc finger protein 276	Downregulated
SLBP	7884	34.5283	0	0.379013	0.001	-8.5661	8.622e-11	1.88413e-10	stem-loop binding protein	Downregulated
LOC100505761	100505761	32.0952	0	0.378865	0.001	-8.56554	3.37224e-10	7.17976e-10	RPARP antisense RNA 1	Downregulated
ELMOD3	84173	51.9949	0	0.378739	0.001	-8.56506	7.96114e-16	2.1648e-15	ELMO/CED-12 domain containing 3	Downregulated
METTL16	79066	114.706	0	0.378546	0.001	-8.56432	1.75072e-34	8.79608e-34	methyltransferase like 16	Downregulated
ARL8A	127829	34.5474	0	0.378346	0.001	-8.56356	8.622e-11	1.88516e-10	ADP-ribosylation factor-like 8A	Downregulated
HOXA9	3205	41.0936	0	0.378127	0.001	-8.56273	7.28658e-13	1.75697e-12	homeobox A9	Downregulated
C1orf131	128061	28.6673	0	0.377701	0.001	-8.5611	5.15868e-09	1.03953e-08	chromosome 1 open reading frame 131	Downregulated
TTN-AS1	100506866	91.4601	0	0.377519	0.001	-8.56041	1.13443e-27	4.61929e-27	TTN antisense RNA 1	Downregulated
USP8	9101	104.247	0	0.377425	0.001	-8.56005	1.60238e-31	7.37782e-31	ubiquitin specific peptidase 8	Downregulated
CHST2	9435	82.4118	0	0.377419	0.001	-8.56002	5.25016e-25	1.96276e-24	carbohydrate (N-acetylglucosamine-6-O) sulfotransferase 2	Downregulated
CES2	8824	77.9453	0	0.376983	0.001	-8.55836	1.58835e-23	5.65627e-23	carboxylesterase 2	Downregulated
PMCHL2	5370	36.2878	0	0.376719	0.001	-8.55734	2.20444e-11	4.96175e-11	pro-melanin-concentrating hormone-like 2, pseudogene	Downregulated
LINC00703	100507059	47.155	0	0.376487	0.001	-8.55646	1.21785e-14	3.15308e-14	long intergenic non-protein coding RNA 703	Downregulated
STARD10	10809	39.1171	0	0.37601	0.001	-8.55463	2.84992e-12	6.65148e-12	StAR-related lipid transfer (START) domain containing 10	Downregulated
NIPA2	81614	57.9338	0	0.375897	0.001	-8.55419	1.33059e-17	3.87152e-17	non imprinted in Prader-Willi/Angelman syndrome 2	Downregulated
LOR	4014	24.0457	0	0.375885	0.001	-8.55415	7.89146e-08	1.50056e-07	loricrin	Downregulated
SLC16A6	9120	77.9259	0	0.374909	0.001	-8.5504	1.58835e-23	5.64957e-23	solute carrier family 16, member 6	Downregulated
LOC648691	648691	61.0397	0	0.374139	0.001	-8.54743	8.69814e-19	2.63756e-18	uncharacterized LOC648691	Downregulated
TRIM14	9830	63.1482	0	0.373866	0.001	-8.54638	2.2239e-19	6.88263e-19	tripartite motif containing 14	Downregulated
NIPAL3	57185	106.647	0	0.373551	0.001	-8.54516	4.0969e-32	1.92471e-31	NIPA-like domain containing 3	Downregulated
RSU1	6251	73.9721	0	0.37353	0.001	-8.54508	2.42978e-22	8.32909e-22	Ras suppressor protein 1	Downregulated
PCGF3	10336	111.155	0	0.372802	0.001	-8.54227	1.35419e-33	6.6535e-33	polycomb group ring finger 3	Downregulated
IL1R1	3554	97.7976	0	0.372588	0.001	-8.54144	1.89605e-29	8.22237e-29	interleukin 1 receptor, type I	Downregulated
CCDC58	131076	13.7845	0	0.372557	0.001	-8.54132	0.000142844	0.000221296	coiled-coil domain containing 58	Downregulated
CD164	8763	49.4419	0	0.372458	0.001	-8.54093	3.11376e-15	8.2703e-15	CD164 molecule, sialomucin	Downregulated
C11orf24	53838	41.295	0	0.37203	0.001	-8.53928	7.28658e-13	1.75839e-12	chromosome 11 open reading frame 24	Downregulated
FIP1L1	81608	43.5711	0	0.372015	0.001	-8.53922	1.86301e-13	4.61924e-13	factor interacting with PAPOLA and CPSF1	Downregulated
MLL5	55904	131.668	0	0.371883	0.001	-8.5387	1.61653e-39	9.28323e-39	lysine (K)-specific methyltransferase 2E	Downregulated
DHX37	57647	89.3124	0	0.371813	0.001	-8.53843	4.437e-27	1.77717e-26	DEAH (Asp-Glu-Ala-His) box polypeptide 37	Downregulated
DSG2	1829	111.062	0	0.371766	0.001	-8.53825	1.35419e-33	6.65895e-33	desmoglein 2	Downregulated
PLEKHG6	55200	56.4772	0	0.371278	0.001	-8.53636	2.63148e-17	7.58857e-17	pleckstrin homology domain containing, family G (with RhoGef domain) member 6	Downregulated
RCOR1	23186	112.813	0	0.371264	0.001	-8.5363	6.8474e-34	3.38369e-33	REST corepressor 1	Downregulated
LOC727896	727896	66.4078	0	0.370595	0.001	-8.5337	2.8751e-20	9.1893e-20	cysteine and histidine-rich domain (CHORD) containing 1 pseudogene	Downregulated
PSD4	23550	98.1148	0	0.37015	0.001	-8.53197	9.58726e-30	4.197e-29	pleckstrin and Sec7 domain containing 4	Downregulated
SPTSSA	171546	49.2456	0	0.370096	0.001	-8.53176	3.11376e-15	8.27946e-15	serine palmitoyltransferase, small subunit A	Downregulated
RAD9A	5883	38.5265	0	0.369583	0.001	-8.52975	5.63624e-12	1.30054e-11	RAD9 homolog A (S. pombe)	Downregulated
BTD	686	40.246	0	0.368895	0.001	-8.52707	1.44105e-12	3.41641e-12	biotinidase	Downregulated
PANK1	53354	120.42	0	0.368594	0.001	-8.52589	2.92608e-36	1.54513e-35	pantothenate kinase 1	Downregulated
SMA5	11042	33.845	0	0.3681	0.001	-8.52395	1.70515e-10	3.67999e-10	glucuronidase, beta pseudogene	Downregulated
DNAJC16	23341	115.545	0	0.36803	0.001	-8.52368	8.8524e-35	4.50613e-34	DnaJ (Hsp40) homolog, subfamily C, member 16	Downregulated
BTAF1	9044	136.501	0	0.367509	0.001	-8.52164	5.34328e-41	3.2033e-40	BTAF1 RNA polymerase II, B-TFIID transcription factor-associated, 170kDa	Downregulated
DISP1	84976	95.5602	0	0.367389	0.001	-8.52116	7.41582e-29	3.13885e-28	dispatched homolog 1 (Drosophila)	Downregulated
C5orf42	65250	217.08	0	0.367215	0.001	-8.52048	5.48606e-65	5.74338e-64	chromosome 5 open reading frame 42	Downregulated
AASDHPPT	60496	55.4579	0	0.366996	0.001	-8.51962	5.20422e-17	1.48402e-16	aminoadipate-semialdehyde dehydrogenase-phosphopantetheinyl transferase	Downregulated
SORD	6652	54.1436	0	0.366884	0.001	-8.51918	1.02922e-16	2.89911e-16	sorbitol dehydrogenase	Downregulated
GTDC1	79712	46.2634	0	0.366741	0.001	-8.51862	2.40852e-14	6.17321e-14	glycosyltransferase-like domain containing 1	Downregulated
WASL	8976	85.6798	0	0.366433	0.001	-8.51741	6.78748e-26	2.61566e-25	Wiskott-Aldrich syndrome-like	Downregulated
WDR33	55339	121.618	0	0.365859	0.001	-8.51514	1.47956e-36	7.85782e-36	WD repeat domain 33	Downregulated
SGSM3	27352	53.896	0	0.365599	0.001	-8.51412	2.03548e-16	5.66969e-16	small G protein signaling modulator 3	Downregulated
FBXL14	144699	40.3868	0	0.365412	0.001	-8.51338	1.44105e-12	3.41102e-12	F-box and leucine-rich repeat protein 14	Downregulated
SPRYD3	84926	56.5416	0	0.365362	0.001	-8.51318	2.63148e-17	7.58493e-17	SPRY domain containing 3	Downregulated
EIF1AX	1964	85.0968	0	0.365259	0.001	-8.51278	6.78748e-26	2.60896e-25	eukaryotic translation initiation factor 1A, X-linked	Downregulated
RAB24	53917	29.4567	0	0.365003	0.001	-8.51176	2.60846e-09	5.33783e-09	RAB24, member RAS oncogene family	Downregulated
REEP2	51308	42.0484	0	0.364434	0.001	-8.50951	3.68442e-13	9.01988e-13	receptor accessory protein 2	Downregulated
NDUFA12	55967	11.0529	0	0.364189	0.001	-8.50854	0.00055869	0.000823159	NADH dehydrogenase (ubiquinone) 1 alpha subcomplex, 12	Downregulated
RASAL3	64926	62.8632	0	0.36389	0.001	-8.50736	4.39816e-19	1.35037e-18	RAS protein activator like 3	Downregulated
LYRM9	201229	28.3376	0	0.363252	0.001	-8.50483	5.15868e-09	1.04092e-08	LYR motif containing 9	Downregulated
LOH12CR1	118426	39.7482	0	0.362927	0.001	-8.50354	2.84992e-12	6.63857e-12	loss of heterozygosity, 12, chromosomal region 1	Downregulated
IP6K1	9807	78.5059	0	0.362776	0.001	-8.50294	8.03142e-24	2.88142e-23	inositol hexakisphosphate kinase 1	Downregulated
MAN2B1	4125	61.5027	0	0.36255	0.001	-8.50204	8.69814e-19	2.63423e-18	mannosidase, alpha, class 2B, member 1	Downregulated
DCUN1D3	123879	54.841	0	0.362155	0.001	-8.50046	1.02922e-16	2.90525e-16	DCN1, defective in cullin neddylation 1, domain containing 3	Downregulated
RRP1B	23076	96.8665	0	0.361981	0.001	-8.49977	3.74976e-29	1.60696e-28	ribosomal RNA processing 1B	Downregulated
LMO7	4008	129.391	0	0.361891	0.001	-8.49941	6.32256e-39	3.57445e-38	LIM domain 7	Downregulated
LMBR1	64327	93.3116	0	0.361384	0.001	-8.49739	2.90048e-28	1.20766e-27	limb development membrane protein 1	Downregulated
ATP2C1	27032	66.0182	0	0.360769	0.001	-8.49493	2.8751e-20	9.18685e-20	ATPase, Ca++ transporting, type 2C, member 1	Downregulated
REXO4	57109	42.6036	0	0.360667	0.001	-8.49452	3.68442e-13	9.02356e-13	REX4, RNA exonuclease 4 homolog (S. cerevisiae)	Downregulated
NT5C3A	51251	32.552	0	0.360663	0.001	-8.49451	3.37224e-10	7.17722e-10	5'-nucleotidase, cytosolic IIIA	Downregulated
TNFRSF10A	8797	33.1747	0	0.359777	0.001	-8.49096	1.70515e-10	3.67867e-10	tumor necrosis factor receptor superfamily, member 10a	Downregulated
KRTAP4-8	728224	21.3773	0	0.359695	0.001	-8.49063	6.1041e-07	1.0976e-06	keratin associated protein 4-8	Downregulated
DDC	1644	32.1835	0	0.359614	0.001	-8.49031	3.37224e-10	7.20147e-10	dopa decarboxylase (aromatic L-amino acid decarboxylase)	Downregulated
TRPV2	51393	53.3729	0	0.359605	0.001	-8.49027	2.03548e-16	5.66444e-16	transient receptor potential cation channel, subfamily V, member 2	Downregulated
MRPS7	51081	26.8553	0	0.359579	0.001	-8.49016	2.01766e-08	3.94722e-08	mitochondrial ribosomal protein S7	Downregulated
LOXL3	84695	56.4209	0	0.359192	0.001	-8.48861	2.63148e-17	7.57221e-17	lysyl oxidase-like 3	Downregulated
LRRC4B	94030	55.7298	0	0.359015	0.001	-8.4879	5.20422e-17	1.48579e-16	leucine rich repeat containing 4B	Downregulated
TRIM4	89122	63.68	0	0.358753	0.001	-8.48685	2.2239e-19	6.87554e-19	tripartite motif containing 4	Downregulated
HADHB	3032	40.4003	0	0.358683	0.001	-8.48657	1.44105e-12	3.4286e-12	hydroxyacyl-CoA dehydrogenase/3-ketoacyl-CoA thiolase/enoyl-CoA hydratase (trifunctional protein), beta subunit	Downregulated
IPMK	253430	115.715	0	0.358462	0.001	-8.48568	8.8524e-35	4.4909e-34	inositol polyphosphate multikinase	Downregulated
SCO1	6341	33.1073	0	0.358227	0.001	-8.48473	1.70515e-10	3.67801e-10	SCO1 cytochrome c oxidase assembly protein	Downregulated
NECAB3	63941	36.7553	0	0.358215	0.001	-8.48468	2.20444e-11	4.97013e-11	N-terminal EF-hand calcium binding protein 3	Downregulated
ATG9A	79065	72.5431	0	0.357826	0.001	-8.48311	4.80532e-22	1.62725e-21	autophagy related 9A	Downregulated
RCN2	5955	41.82	0	0.357299	0.001	-8.48099	7.28658e-13	1.75416e-12	reticulocalbin 2, EF-hand calcium binding domain	Downregulated
DEAF1	10522	50.9107	0	0.356956	0.001	-8.4796	1.57445e-15	4.23522e-15	DEAF1 transcription factor	Downregulated
ZMYM2	7750	191.288	0	0.356955	0.001	-8.4796	2.74972e-57	2.435e-56	zinc finger, MYM-type 2	Downregulated
ALG2	85365	53.0234	0	0.356615	0.001	-8.47822	2.03548e-16	5.67232e-16	ALG2, alpha-1,3/1,6-mannosyltransferase	Downregulated
ST3GAL2	6483	83.2685	0	0.355879	0.001	-8.47524	2.65472e-25	1.0015e-24	ST3 beta-galactoside alpha-2,3-sialyltransferase 2	Downregulated
PTRH2	51651	14.7434	0	0.35493	0.001	-8.47139	7.22282e-05	0.000114271	peptidyl-tRNA hydrolase 2	Downregulated
RASGEF1C	255426	41.0819	0	0.353953	0.001	-8.46741	7.28658e-13	1.75556e-12	RasGEF domain family, member 1C	Downregulated
AREG	374	23.7623	0	0.353655	0.001	-8.4662	1.56067e-07	2.91727e-07	amphiregulin	Downregulated
C9orf129	445577	21.1988	0	0.353241	0.001	-8.46451	6.1041e-07	1.09826e-06	chromosome 9 open reading frame 129	Downregulated
PSPH	5723	39.6001	0	0.353067	0.001	-8.4638	2.84992e-12	6.64244e-12	phosphoserine phosphatase	Downregulated
WRNIP1	56897	47.9433	0	0.352753	0.001	-8.46251	1.21785e-14	3.15376e-14	Werner helicase interacting protein 1	Downregulated
ACSL1	2180	69.6757	0	0.35146	0.001	-8.45722	3.71696e-21	1.22551e-20	acyl-CoA synthetase long-chain family member 1	Downregulated
CCSER1	401145	72.4801	0	0.351206	0.001	-8.45617	4.80532e-22	1.62955e-21	coiled-coil serine-rich protein 1	Downregulated
ZC3H15	55854	39.4743	0	0.35079	0.001	-8.45446	2.84992e-12	6.66183e-12	zinc finger CCCH-type containing 15	Downregulated
LTN1	26046	143.126	0	0.350392	0.001	-8.45283	4.51568e-43	2.83452e-42	listerin E3 ubiquitin protein ligase 1	Downregulated
DZIP1L	199221	64.3024	0	0.34998	0.001	-8.45113	1.1245e-19	3.52928e-19	DAZ interacting zinc finger protein 1-like	Downregulated
RNF217	154214	92.5905	0	0.349936	0.001	-8.45095	5.7362e-28	2.35649e-27	ring finger protein 217	Downregulated
KCNA4	3739	76.8096	0	0.34965	0.001	-8.44977	3.14124e-23	1.10746e-22	potassium channel, voltage gated shaker related subfamily A, member 4	Downregulated
NEK9	91754	102.234	0	0.349439	0.001	-8.4489	6.26722e-31	2.83027e-30	NIMA-related kinase 9	Downregulated
PRDM10	56980	108.518	0	0.349302	0.001	-8.44833	1.04748e-32	5.01521e-32	PR domain containing 10	Downregulated
PGRMC2	10424	69.465	0	0.348818	0.001	-8.44633	3.71696e-21	1.22417e-20	progesterone receptor membrane component 2	Downregulated
MRFAP1L1	114932	29.1751	0	0.348302	0.001	-8.44419	2.60846e-09	5.33874e-09	Morf4 family associated protein 1-like 1	Downregulated
LOC100133331	100133331	78.1859	0	0.348054	0.001	-8.44317	8.03142e-24	2.87455e-23	uncharacterized LOC100133331	Downregulated
CAPN5	726	80.3265	0	0.347777	0.001	-8.44202	2.05344e-24	7.55676e-24	calpain 5	Downregulated
ALKBH8	91801	74.1139	0	0.347653	0.001	-8.4415	1.2286e-22	4.24793e-22	alkB, alkylation repair homolog 8 (E. coli)	Downregulated
CCNL1	57018	47.8134	0	0.347345	0.001	-8.44023	1.21785e-14	3.16399e-14	cyclin L1	Downregulated
COX10	1352	54.7305	0	0.345758	0.001	-8.43362	1.02922e-16	2.90456e-16	COX10 heme A:farnesyltransferase cytochrome c oxidase assembly factor	Downregulated
SUV39H1	6839	49.9095	0	0.345737	0.001	-8.43353	3.11376e-15	8.27579e-15	suppressor of variegation 3-9 homolog 1 (Drosophila)	Downregulated
DNAJC21	134218	110.558	0	0.34531	0.001	-8.43175	2.67816e-33	1.30517e-32	DnaJ (Hsp40) homolog, subfamily C, member 21	Downregulated
ANKRD29	147463	41.4243	0	0.345131	0.001	-8.431	7.28658e-13	1.75205e-12	ankyrin repeat domain 29	Downregulated
-	101929083	28.9428	0	0.34466	0.001	-8.42903	5.15868e-09	1.039e-08	cancer susceptibility candidate 6 (non-protein coding)	Downregulated
SLC25A23	79085	62.9043	0	0.344647	0.001	-8.42898	4.39816e-19	1.35072e-18	solute carrier family 25 (mitochondrial carrier; phosphate carrier), member 23	Downregulated
DPP4	1803	70.8469	0	0.344526	0.001	-8.42847	1.87945e-21	6.26207e-21	dipeptidyl-peptidase 4	Downregulated
ZNF618	114991	165.034	0	0.342996	0.001	-8.42205	1.37821e-49	1.02792e-48	zinc finger protein 618	Downregulated
SGK223	157285	84.9728	0	0.341878	0.001	-8.41734	1.34234e-25	5.1236e-25	homolog of rat pragma of Rnd2	Downregulated
CYP27A1	1593	42.7232	0	0.341391	0.001	-8.41528	3.68442e-13	9.02172e-13	cytochrome P450, family 27, subfamily A, polypeptide 1	Downregulated
ARHGAP31	57514	145.495	0	0.341201	0.001	-8.41448	1.15455e-43	7.35095e-43	Rho GTPase activating protein 31	Downregulated
DPAGT1	1798	38.3962	0	0.341049	0.001	-8.41384	5.63624e-12	1.29929e-11	dolichyl-phosphate (UDP-N-acetylglucosamine) N-acetylglucosaminephosphotransferase 1 (GlcNAc-1-P transferase)	Downregulated
LOC100288152	100288152	31.6497	0	0.339738	0.001	-8.40828	6.66918e-10	1.40497e-09	uncharacterized LOC100288152	Downregulated
MBLAC2	153364	76.5839	0	0.338773	0.001	-8.40418	3.14124e-23	1.10713e-22	metallo-beta-lactamase domain containing 2	Downregulated
WIPI2	26100	76.4072	0	0.338386	0.001	-8.40253	3.14124e-23	1.10811e-22	WD repeat domain, phosphoinositide interacting 2	Downregulated
ZNF146	7705	66.9164	0	0.338261	0.001	-8.40199	2.8751e-20	9.22367e-20	zinc finger protein 146	Downregulated
ALG3	10195	25.7788	0	0.337821	0.001	-8.40012	3.99028e-08	7.67627e-08	ALG3, alpha-1,3- mannosyltransferase	Downregulated
SWI5	375757	17.5192	0	0.336292	0.001	-8.39357	9.33774e-06	1.56254e-05	SWI5 recombination repair homolog (yeast)	Downregulated
IFI30	10437	18.0516	0	0.33629	0.001	-8.39356	4.72158e-06	8.06268e-06	interferon, gamma-inducible protein 30	Downregulated
NAMPT	10135	81.2175	0	0.336266	0.001	-8.39346	1.03831e-24	3.8565e-24	nicotinamide phosphoribosyltransferase	Downregulated
KIAA1191	57179	40.5721	0	0.335669	0.001	-8.3909	1.44105e-12	3.42656e-12	KIAA1191	Downregulated
PLEKHA8	84725	138.708	0	0.335457	0.001	-8.38998	1.36615e-41	8.30199e-41	pleckstrin homology domain containing, family A (phosphoinositide binding specific) member 8	Downregulated
SRRM2-AS1	100128788	23.9381	0	0.334959	0.001	-8.38784	1.56067e-07	2.91138e-07	SRRM2 antisense RNA 1	Downregulated
PRR5L	79899	61.1102	0	0.334888	0.001	-8.38754	8.69814e-19	2.63556e-18	proline rich 5 like	Downregulated
ZNF75A	7627	37.9354	0	0.334136	0.001	-8.38429	1.11466e-11	2.53983e-11	zinc finger protein 75a	Downregulated
ZBTB47	92999	97.1181	0	0.334122	0.001	-8.38423	1.89605e-29	8.21644e-29	zinc finger and BTB domain containing 47	Downregulated
ITPKA	3706	32.5715	0	0.33411	0.001	-8.38418	3.37224e-10	7.18613e-10	inositol-trisphosphate 3-kinase A	Downregulated
DTD1	92675	23.8069	0	0.333862	0.001	-8.38311	1.56067e-07	2.90687e-07	D-tyrosyl-tRNA deacylase 1	Downregulated
ZNF79	7633	34.5767	0	0.333211	0.001	-8.38029	8.622e-11	1.88619e-10	zinc finger protein 79	Downregulated
GGA3	23163	52.2249	0	0.332702	0.001	-8.37809	4.0255e-16	1.10563e-15	golgi-associated, gamma adaptin ear containing, ARF binding protein 3	Downregulated
LOC645355	645355	29.3673	0	0.332574	0.001	-8.37753	2.60846e-09	5.34056e-09	MIR3976 host gene	Downregulated
TMX2	51075	26.8312	0	0.331603	0.001	-8.37331	2.01766e-08	3.94658e-08	thioredoxin-related transmembrane protein 2	Downregulated
NMD3	51068	47.9731	0	0.331596	0.001	-8.37328	1.21785e-14	3.16468e-14	NMD3 ribosome export adaptor	Downregulated
ITPR2	3709	219.253	0	0.330968	0.001	-8.37055	1.40266e-65	1.49451e-64	inositol 1,4,5-trisphosphate receptor, type 2	Downregulated
FUNDC1	139341	20.1167	0	0.330558	0.001	-8.36876	1.20719e-06	2.13994e-06	FUN14 domain containing 1	Downregulated
LPAR5	57121	46.6147	0	0.329786	0.001	-8.36539	2.40852e-14	6.17981e-14	lysophosphatidic acid receptor 5	Downregulated
RND3	390	46.8589	0	0.329423	0.001	-8.3638	2.40852e-14	6.16532e-14	Rho family GTPase 3	Downregulated
CTTNBP2NL	55917	102.183	0	0.329021	0.001	-8.36204	6.26722e-31	2.83133e-30	CTTNBP2 N-terminal like	Downregulated
ANKRD13B	124930	55.2182	0	0.328364	0.001	-8.35915	5.20422e-17	1.48121e-16	ankyrin repeat domain 13B	Downregulated
BMP8B	656	65.0781	0	0.328268	0.001	-8.35873	5.686e-20	1.80009e-19	bone morphogenetic protein 8b	Downregulated
NEIL3	55247	41.2814	0	0.327933	0.001	-8.35726	7.28658e-13	1.7598e-12	nei endonuclease VIII-like 3 (E. coli)	Downregulated
GIGYF1	64599	109.193	0	0.327753	0.001	-8.35647	5.29652e-33	2.55938e-32	GRB10 interacting GYF protein 1	Downregulated
ABCB10	23456	66.3643	0	0.327093	0.001	-8.35356	2.8751e-20	9.2286e-20	ATP-binding cassette, sub-family B (MDR/TAP), member 10	Downregulated
STAC2	342667	56.3837	0	0.326084	0.001	-8.3491	2.63148e-17	7.57402e-17	SH3 and cysteine rich domain 2	Downregulated
OAS3	4940	114.221	0	0.325909	0.001	-8.34833	1.75072e-34	8.81082e-34	2'-5'-oligoadenylate synthetase 3, 100kDa	Downregulated
LOC283045	283045	44.7252	0	0.32541	0.001	-8.34611	9.42018e-14	2.35956e-13	uncharacterized LOC283045	Downregulated
-	101928496	63.5898	0	0.324301	0.001	-8.34119	2.2239e-19	6.89151e-19	long intergenic non-protein coding RNA 1492	Downregulated
PEX14	5195	32.9937	0	0.324223	0.001	-8.34084	3.37224e-10	7.17595e-10	peroxisomal biogenesis factor 14	Downregulated
XRN1	54464	172.666	0	0.324216	0.001	-8.34081	1.16475e-51	9.16533e-51	5'-3' exoribonuclease 1	Downregulated
GUSB	2990	33.6345	0	0.323802	0.001	-8.33897	1.70515e-10	3.68065e-10	glucuronidase, beta	Downregulated
LRRC42	115353	29.8918	0	0.323065	0.001	-8.33568	2.60846e-09	5.34147e-09	leucine rich repeat containing 42	Downregulated
CTNNBIP1	56998	50.1661	0	0.322843	0.001	-8.33469	1.57445e-15	4.22765e-15	catenin, beta interacting protein 1	Downregulated
AMD1	262	54.0435	0	0.321682	0.001	-8.32949	1.02922e-16	2.90252e-16	adenosylmethionine decarboxylase 1	Downregulated
DDX26B	203522	65.0678	0	0.321455	0.001	-8.32847	5.686e-20	1.80199e-19	DEAD/H (Asp-Glu-Ala-Asp/His) box polypeptide 26B	Downregulated
OR4F13P	390651	34.8743	0	0.321368	0.001	-8.32808	8.622e-11	1.88791e-10	olfactory receptor, family 4, subfamily F, member 13 pseudogene	Downregulated
CUL7	9820	93.275	0	0.321133	0.001	-8.32703	2.90048e-28	1.20224e-27	cullin 7	Downregulated
POLRMT	5442	64.07	0	0.320876	0.001	-8.32587	1.1245e-19	3.52192e-19	polymerase (RNA) mitochondrial (DNA directed)	Downregulated
LOC399815	399815	35.4503	0	0.320594	0.001	-8.3246	4.35966e-11	9.6731e-11	chromosome 10 open reading frame 88 pseudogene	Downregulated
MTRR	4552	55.6186	0	0.320562	0.001	-8.32446	5.20422e-17	1.48297e-16	5-methyltetrahydrofolate-homocysteine methyltransferase reductase	Downregulated
HSD17B14	51171	21.3018	0	0.320307	0.001	-8.32331	6.1041e-07	1.09843e-06	hydroxysteroid (17-beta) dehydrogenase 14	Downregulated
CASP7	840	41.1404	0	0.320234	0.001	-8.32298	7.28658e-13	1.75345e-12	caspase 7, apoptosis-related cysteine peptidase	Downregulated
ZBTB22	9278	44.9554	0	0.319718	0.001	-8.32066	9.42018e-14	2.364e-13	zinc finger and BTB domain containing 22	Downregulated
CDK5RAP1	51654	31.957	0	0.319672	0.001	-8.32045	6.66918e-10	1.40596e-09	CDK5 regulatory subunit associated protein 1	Downregulated
N6AMT1	29104	16.7318	0	0.319237	0.001	-8.31848	1.8467e-05	3.02857e-05	N-6 adenine-specific DNA methyltransferase 1 (putative)	Downregulated
SCPEP1	59342	32.4754	0	0.317975	0.001	-8.31277	3.37224e-10	7.16959e-10	serine carboxypeptidase 1	Downregulated
LINC00648	100506433	48.4109	0	0.317809	0.001	-8.31202	6.158e-15	1.61912e-14	long intergenic non-protein coding RNA 648	Downregulated
SP7	121340	53.1671	0	0.317616	0.001	-8.31114	2.03548e-16	5.6605e-16	Sp7 transcription factor	Downregulated
TFAP2A	7020	55.0263	0	0.317555	0.001	-8.31086	5.20422e-17	1.48614e-16	transcription factor AP-2 alpha (activating enhancer binding protein 2 alpha)	Downregulated
UBR7	55148	59.6166	0	0.317454	0.001	-8.3104	3.40202e-18	1.01293e-17	ubiquitin protein ligase E3 component n-recognin 7 (putative)	Downregulated
TMPRSS2	7113	53.4814	0	0.31714	0.001	-8.30898	2.03548e-16	5.66312e-16	transmembrane protease, serine 2	Downregulated
EI24	9538	35.5209	0	0.316996	0.001	-8.30832	4.35966e-11	9.67131e-11	etoposide induced 2.4	Downregulated
PMF1-BGLAP	100527963	12.9954	0	0.316875	0.001	-8.30777	0.000282498	0.00042616	PMF1-BGLAP readthrough	Downregulated
RPA1	6117	72.3245	0	0.316605	0.001	-8.30654	4.80532e-22	1.63231e-21	replication protein A1, 70kDa	Downregulated
PDE9A	5152	27.6342	0	0.315778	0.001	-8.30277	1.02022e-08	2.0313e-08	phosphodiesterase 9A	Downregulated
PBOV1	59351	41.3967	0	0.315235	0.001	-8.30028	7.28658e-13	1.75874e-12	prostate and breast cancer overexpressed 1	Downregulated
MME	4311	92.9304	0	0.314293	0.001	-8.29597	5.7362e-28	2.35569e-27	membrane metallo-endopeptidase	Downregulated
SCAPER	49855	78.1667	0	0.314161	0.001	-8.29536	8.03142e-24	2.87884e-23	S-phase cyclin A-associated protein in the ER	Downregulated
FOXA1	3169	55.9438	0	0.313678	0.001	-8.29314	5.20422e-17	1.48367e-16	forkhead box A1	Downregulated
MAK16	84549	59.0236	0	0.312977	0.001	-8.28991	3.40202e-18	1.01394e-17	MAK16 homolog (S. cerevisiae)	Downregulated
PLD3	23646	35.057	0	0.312708	0.001	-8.28867	4.35966e-11	9.691e-11	phospholipase D family, member 3	Downregulated
RORC	6097	50.1147	0	0.312637	0.001	-8.28834	1.57445e-15	4.23902e-15	RAR-related orphan receptor C	Downregulated
EPB41	2035	39.6306	0	0.312072	0.001	-8.28574	2.84992e-12	6.64631e-12	erythrocyte membrane protein band 4.1	Downregulated
BPTF	2186	178.564	0	0.311921	0.001	-8.28504	1.94671e-53	1.59564e-52	bromodomain PHD finger transcription factor	Downregulated
STK32B	55351	52.7628	0	0.311708	0.001	-8.28405	4.0255e-16	1.10513e-15	serine/threonine kinase 32B	Downregulated
ALG11	440138	23.2739	0	0.311625	0.001	-8.28367	1.56067e-07	2.91501e-07	ALG11, alpha-1,2-mannosyltransferase	Downregulated
TAL1	6886	68.2771	0	0.311407	0.001	-8.28266	7.35092e-21	2.39603e-20	T-cell acute lymphocytic leukemia 1	Downregulated
KCNN3	3782	196.224	0	0.311389	0.001	-8.28257	9.08896e-59	8.34405e-58	potassium channel, calcium activated intermediate/small conductance subfamily N alpha, member 3	Downregulated
SNAPC4	6621	76.2379	0	0.311027	0.001	-8.2809	3.14124e-23	1.10681e-22	small nuclear RNA activating complex, polypeptide 4, 190kDa	Downregulated
PEAK1	79834	193.577	0	0.31036	0.001	-8.2778	7.03038e-58	6.30476e-57	pseudopodium-enriched atypical kinase 1	Downregulated
SPATA5L1	79029	41.9807	0	0.310328	0.001	-8.27765	7.28658e-13	1.75768e-12	spermatogenesis associated 5-like 1	Downregulated
-	104548971	19.3892	0	0.310262	0.001	-8.27734	2.38744e-06	4.15123e-06	senescence associated long non-coding RNA 1	Downregulated
ZBTB20	26137	439.158	0	0.309375	0.001	-8.27321	9.83722e-131	3.27217e-129	zinc finger and BTB domain containing 20	Downregulated
CDC40	51362	62.8044	0	0.309145	0.001	-8.27214	4.39816e-19	1.34796e-18	cell division cycle 40	Downregulated
RRP9	9136	25.5842	0	0.308151	0.001	-8.26749	3.99028e-08	7.69847e-08	ribosomal RNA processing 9, small subunit (SSU) processome component, homolog (yeast)	Downregulated
BUD13	84811	35.7592	0	0.308093	0.001	-8.26722	4.35966e-11	9.70898e-11	BUD13 homolog (S. cerevisiae)	Downregulated
SLC25A4	291	71.4086	0	0.307271	0.001	-8.26337	9.50336e-22	3.19207e-21	solute carrier family 25 (mitochondrial carrier; adenine nucleotide translocator), member 4	Downregulated
C8orf37	157657	54.3892	0	0.306594	0.001	-8.26019	1.02922e-16	2.8964e-16	chromosome 8 open reading frame 37	Downregulated
IL10	3586	26.0858	0	0.30659	0.001	-8.26017	2.01766e-08	3.95367e-08	interleukin 10	Downregulated
CREM	1390	31.3468	0	0.30645	0.001	-8.25951	6.66918e-10	1.40621e-09	cAMP responsive element modulator	Downregulated
ZNF334	55713	62.1845	0	0.306173	0.001	-8.2582	4.39816e-19	1.34762e-18	zinc finger protein 334	Downregulated
PSMF1	9491	59.145	0	0.305415	0.001	-8.25463	3.40202e-18	1.01268e-17	proteasome (prosome, macropain) inhibitor subunit 1 (PI31)	Downregulated
FBXO30	84085	70.8319	0	0.30479	0.001	-8.25167	1.87945e-21	6.2638e-21	F-box protein 30	Downregulated
-	104355135	11.4492	0	0.304658	0.001	-8.25105	0.00055869	0.000820441	long intergenic non-protein coding RNA 431	Downregulated
CDC123	8872	24.9017	0	0.304577	0.001	-8.25066	7.89146e-08	1.4989e-07	cell division cycle 123	Downregulated
MMAB	326625	66.4684	0	0.304403	0.001	-8.24984	2.8751e-20	9.22121e-20	methylmalonic aciduria (cobalamin deficiency) cblB type	Downregulated
GJA3	2700	83.5008	0	0.304116	0.001	-8.24848	2.65472e-25	1.00308e-24	gap junction protein, alpha 3, 46kDa	Downregulated
TIAM1	7074	115.353	0	0.303497	0.001	-8.24554	8.8524e-35	4.489e-34	T-cell lymphoma invasion and metastasis 1	Downregulated
ETFB	2109	15.6652	0	0.303425	0.001	-8.24519	3.65218e-05	5.90406e-05	electron-transfer-flavoprotein, beta polypeptide	Downregulated
ATG5	9474	45.6872	0	0.303398	0.001	-8.24507	4.76326e-14	1.20618e-13	autophagy related 5	Downregulated
TEAD3	7005	48.1161	0	0.303264	0.001	-8.24443	6.158e-15	1.61664e-14	TEA domain family member 3	Downregulated
PRKRIP1	79706	34.6362	0	0.303244	0.001	-8.24434	8.622e-11	1.88998e-10	PRKR interacting protein 1 (IL11 inducible)	Downregulated
LIPG	9388	65.9799	0	0.302972	0.001	-8.24304	5.686e-20	1.7982e-19	lipase, endothelial	Downregulated
CRY1	1407	52.6474	0	0.302904	0.001	-8.24272	4.0255e-16	1.10588e-15	cryptochrome circadian clock 1	Downregulated
ANKRD36BP1	84832	29.7353	0	0.302561	0.001	-8.24108	2.60846e-09	5.33238e-09	ankyrin repeat domain 36B pseudogene 1	Downregulated
LRCH1	23143	77.7419	0	0.302475	0.001	-8.24067	1.58835e-23	5.63788e-23	leucine-rich repeats and calponin homology (CH) domain containing 1	Downregulated
ANKRD65	441869	25.96	0	0.302113	0.001	-8.23894	3.99028e-08	7.68982e-08	ankyrin repeat domain 65	Downregulated
LOC595101	595101	68.282	0	0.301979	0.001	-8.2383	7.35092e-21	2.40255e-20	SMG1 pseudogene 5	Downregulated
CDC73	79577	94.421	0	0.301926	0.001	-8.23805	1.46661e-28	6.15986e-28	cell division cycle 73	Downregulated
PAN3-AS1	100288730	34.9418	0	0.301737	0.001	-8.23715	8.622e-11	1.89274e-10	PAN3 antisense RNA 1	Downregulated
PRPF19	27339	36.9278	0	0.30092	0.001	-8.23324	2.20444e-11	4.95896e-11	pre-mRNA processing factor 19	Downregulated
TTC12	54970	36.6682	0	0.300355	0.001	-8.23052	2.20444e-11	4.96547e-11	tetratricopeptide repeat domain 12	Downregulated
STRADB	55437	36.1715	0	0.300179	0.001	-8.22968	2.20444e-11	4.972e-11	STE20-related kinase adaptor beta	Downregulated
ARHGAP5	394	151.723	0	0.299934	0.001	-8.2285	1.92968e-45	1.30104e-44	Rho GTPase activating protein 5	Downregulated
CCDC61	729440	28.7631	0	0.298929	0.001	-8.22366	5.15868e-09	1.04005e-08	coiled-coil domain containing 61	Downregulated
CAT	847	35.9977	0	0.298737	0.001	-8.22273	4.35966e-11	9.67667e-11	catalase	Downregulated
SS18L1	26039	59.5632	0	0.298305	0.001	-8.22064	3.40202e-18	1.01419e-17	synovial sarcoma translocation gene on chromosome 18-like 1	Downregulated
FRMD4B	23150	102.082	0	0.297683	0.001	-8.21763	6.26722e-31	2.82495e-30	FERM domain containing 4B	Downregulated
PPM1F	9647	81.2856	0	0.297191	0.001	-8.21525	1.03831e-24	3.84935e-24	protein phosphatase, Mg2+/Mn2+ dependent, 1F	Downregulated
ST3GAL3	6487	23.3968	0	0.296904	0.001	-8.21385	1.56067e-07	2.90642e-07	ST3 beta-galactoside alpha-2,3-sialyltransferase 3	Downregulated
ATXN1	6310	165.38	0	0.296434	0.001	-8.21157	1.37821e-49	1.02601e-48	ataxin 1	Downregulated
DNMBP	23268	100.086	0	0.296195	0.001	-8.2104	2.45124e-30	1.08454e-29	dynamin binding protein	Downregulated
SLC35D1	23169	100.903	0	0.296022	0.001	-8.20956	2.45124e-30	1.08534e-29	solute carrier family 35 (UDP-GlcA/UDP-GalNAc transporter), member D1	Downregulated
TEX35	84066	13.7475	0	0.295979	0.001	-8.20935	0.000142844	0.000220613	testis expressed 35	Downregulated
RCHY1	25898	64.9398	0	0.295687	0.001	-8.20793	1.1245e-19	3.5155e-19	ring finger and CHY zinc finger domain containing 1, E3 ubiquitin protein ligase	Downregulated
COQ10A	93058	25.8291	0	0.295329	0.001	-8.20618	3.99028e-08	7.7059e-08	coenzyme Q10 homolog A (S. cerevisiae)	Downregulated
HCCS	3052	35.0581	0	0.294813	0.001	-8.20366	4.35966e-11	9.70538e-11	holocytochrome c synthase	Downregulated
TMEM194A	23306	83.7881	0	0.294191	0.001	-8.20061	2.65472e-25	1.00245e-24	transmembrane protein 194A	Downregulated
PHF5A	84844	16.8852	0	0.294033	0.001	-8.19983	1.8467e-05	3.03271e-05	PHD finger protein 5A	Downregulated
ZFAND2A	90637	13.7591	0	0.2929	0.001	-8.19426	0.000142844	0.000220869	zinc finger, AN1-type domain 2A	Downregulated
ZSCAN32	54925	34.3474	0	0.292735	0.001	-8.19345	8.622e-11	1.88722e-10	zinc finger and SCAN domain containing 32	Downregulated
ADAM19	8728	100.989	0	0.292695	0.001	-8.19325	2.45124e-30	1.08414e-29	ADAM metallopeptidase domain 19	Downregulated
SNAP29	9342	65.7876	0	0.292586	0.001	-8.19272	5.686e-20	1.79914e-19	synaptosomal-associated protein, 29kDa	Downregulated
MUT	4594	59.6587	0	0.292143	0.001	-8.19053	3.40202e-18	1.01368e-17	methylmalonyl CoA mutase	Downregulated
COL12A1	1303	177.972	0	0.291633	0.001	-8.18801	3.84996e-53	3.13426e-52	collagen, type XII, alpha 1	Downregulated
SPOPL	339745	87.6454	0	0.290101	0.001	-8.18041	1.7354e-26	6.82563e-26	speckle-type POZ protein-like	Downregulated
FANCC	2176	70.2565	0	0.289681	0.001	-8.17832	1.87945e-21	6.26728e-21	Fanconi anemia, complementation group C	Downregulated
RBKS	64080	36.3553	0	0.289651	0.001	-8.17817	2.20444e-11	4.96082e-11	ribokinase	Downregulated
RPL36A	6173	35.8293	0	0.289602	0.001	-8.17793	4.35966e-11	9.69639e-11	ribosomal protein L36a	Downregulated
CCDC51	79714	20.9971	0	0.289108	0.001	-8.17546	1.20719e-06	2.13774e-06	coiled-coil domain containing 51	Downregulated
SDHAP3	728609	17.329	0	0.289011	0.001	-8.17498	9.33774e-06	1.56232e-05	succinate dehydrogenase complex, subunit A, flavoprotein pseudogene 3	Downregulated
PLEKHA6	22874	113.038	0	0.288747	0.001	-8.17366	3.46236e-34	1.73161e-33	pleckstrin homology domain containing, family A member 6	Downregulated
TRIM7	81786	39.1439	0	0.28801	0.001	-8.16998	2.84992e-12	6.65536e-12	tripartite motif containing 7	Downregulated
ZFYVE9	9372	76.1403	0	0.287592	0.001	-8.16788	3.14124e-23	1.10778e-22	zinc finger, FYVE domain containing 9	Downregulated
LINC00371	647166	31.3535	0	0.287229	0.001	-8.16606	6.66918e-10	1.40374e-09	long intergenic non-protein coding RNA 371	Downregulated
MRPL23	6150	11.205	0	0.286492	0.001	-8.16235	0.00055869	0.000821849	mitochondrial ribosomal protein L23	Downregulated
CDK17	5128	63.1376	0	0.28638	0.001	-8.16179	2.2239e-19	6.8844e-19	cyclin-dependent kinase 17	Downregulated
C16orf55	124045	21.1404	0	0.286055	0.001	-8.16015	6.1041e-07	1.09777e-06	spermatogenesis associated 33	Downregulated
ZNF259	8882	26.9522	0	0.284796	0.001	-8.15379	2.01766e-08	3.95238e-08	ZPR1 zinc finger	Downregulated
PTAR1	375743	150.73	0	0.284436	0.001	-8.15196	3.81628e-45	2.55155e-44	protein prenyltransferase alpha subunit repeat containing 1	Downregulated
L1CAM	3897	74.8126	0	0.28422	0.001	-8.15086	1.2286e-22	4.25038e-22	L1 cell adhesion molecule	Downregulated
LOC100129195	100129195	29.5325	0	0.283735	0.001	-8.1484	2.60846e-09	5.33419e-09	ZSCAN16 antisense RNA 1	Downregulated
WAPAL	23063	94.1064	0	0.283683	0.001	-8.14814	1.46661e-28	6.1577e-28	wings apart-like homolog (Drosophila)	Downregulated
C16orf89	146556	28.6703	0	0.283502	0.001	-8.14722	5.15868e-09	1.03813e-08	chromosome 16 open reading frame 89	Downregulated
MND1	84057	12.1534	0	0.283222	0.001	-8.14579	0.000282498	0.000424986	meiotic nuclear divisions 1 homolog (S. cerevisiae)	Downregulated
KLHDC10	23008	95.6762	0	0.282307	0.001	-8.14112	7.41582e-29	3.13996e-28	kelch domain containing 10	Downregulated
ACO1	48	52.7708	0	0.282111	0.001	-8.14012	4.0255e-16	1.10614e-15	aconitase 1, soluble	Downregulated
ARRB1	408	111.64	0	0.282095	0.001	-8.14004	1.35419e-33	6.66988e-33	arrestin, beta 1	Downregulated
SLC26A1	10861	17.3815	0	0.281703	0.001	-8.13803	9.33774e-06	1.56341e-05	solute carrier family 26 (anion exchanger), member 1	Downregulated
EXOC5	10640	126.332	0	0.281422	0.001	-8.13659	4.89054e-38	2.70376e-37	exocyst complex component 5	Downregulated
PDP1	54704	62.5158	0	0.28087	0.001	-8.13376	4.39816e-19	1.34556e-18	pyruvate dehyrogenase phosphatase catalytic subunit 1	Downregulated
NHSL1	57224	103.62	0	0.280697	0.001	-8.13287	3.16898e-31	1.44414e-30	NHS-like 1	Downregulated
LOC100133315	100133315	18.4057	0	0.280093	0.001	-8.12976	4.72158e-06	8.05809e-06	transient receptor potential cation channel, subfamily C, member 2-like	Downregulated
STAB2	55576	121.769	0	0.279676	0.001	-8.12761	1.47956e-36	7.84741e-36	stabilin 2	Downregulated
CADPS2	93664	87.5704	0	0.279595	0.001	-8.12719	1.7354e-26	6.83682e-26	Ca++-dependent secretion activator 2	Downregulated
MAN2A1	4124	104.7	0	0.279506	0.001	-8.12674	1.60238e-31	7.40622e-31	mannosidase, alpha, class 2A, member 1	Downregulated
MAPK12	6300	27.4212	0	0.279315	0.001	-8.12575	1.02022e-08	2.02995e-08	mitogen-activated protein kinase 12	Downregulated
MRPS25	64432	66.9691	0	0.27843	0.001	-8.12117	2.8751e-20	9.204e-20	mitochondrial ribosomal protein S25	Downregulated
THAP9-AS1	100499177	32.2905	0	0.277829	0.001	-8.11805	3.37224e-10	7.19251e-10	THAP9 antisense RNA 1	Downregulated
CEACAM8	1088	33.9129	0	0.277425	0.001	-8.11595	1.70515e-10	3.68595e-10	carcinoembryonic antigen-related cell adhesion molecule 8	Downregulated
APOA5	116519	27.983	0	0.27714	0.001	-8.11447	1.02022e-08	2.02861e-08	apolipoprotein A-V	Downregulated
C2orf42	54980	36.8918	0	0.277033	0.001	-8.11391	2.20444e-11	4.9692e-11	chromosome 2 open reading frame 42	Downregulated
DLC1	10395	84.2591	0	0.276717	0.001	-8.11227	1.34234e-25	5.11222e-25	DLC1 Rho GTPase activating protein	Downregulated
RAD51L3-RFFL	100529207	56.7179	0	0.276456	0.001	-8.11091	2.63148e-17	7.59222e-17	RAD51L3-RFFL readthrough	Downregulated
SETD5-AS1	440944	27.3015	0	0.276165	0.001	-8.10939	1.02022e-08	2.02626e-08	THUMPD3 antisense RNA 1	Downregulated
MAPKBP1	23005	93.2647	0	0.276137	0.001	-8.10924	2.90048e-28	1.2039e-27	mitogen-activated protein kinase binding protein 1	Downregulated
TOM1L1	10040	34.0603	0	0.275891	0.001	-8.10795	8.622e-11	1.89032e-10	target of myb1 (chicken)-like 1	Downregulated
VCPIP1	80124	118.77	0	0.275796	0.001	-8.10746	1.14445e-35	5.96724e-35	valosin containing protein (p97)/p47 complex interacting protein 1	Downregulated
NETO1	81832	34.0736	0	0.274241	0.001	-8.0993	8.622e-11	1.88929e-10	neuropilin (NRP) and tolloid (TLL)-like 1	Downregulated
SENP5	205564	91.2106	0	0.273995	0.001	-8.09801	1.13443e-27	4.62399e-27	SUMO1/sentrin specific peptidase 5	Downregulated
HDGFRP3	50810	35.074	0	0.273576	0.001	-8.0958	4.35966e-11	9.69998e-11	hepatoma-derived growth factor, related protein 3	Downregulated
PLK4	10733	53.0037	0	0.273181	0.001	-8.09371	2.03548e-16	5.66838e-16	polo-like kinase 4	Downregulated
CD2BP2	10421	49.6794	0	0.272942	0.001	-8.09245	3.11376e-15	8.26482e-15	CD2 (cytoplasmic tail) binding protein 2	Downregulated
GIMAP1	170575	63.5106	0	0.272666	0.001	-8.09099	2.2239e-19	6.88085e-19	GTPase, IMAP family member 1	Downregulated
ALDH1A2	8854	49.9658	0	0.272419	0.001	-8.08968	3.11376e-15	8.26664e-15	aldehyde dehydrogenase 1 family, member A2	Downregulated
NOL11	25926	36.8277	0	0.272236	0.001	-8.08871	2.20444e-11	4.95154e-11	nucleolar protein 11	Downregulated
PRDM11	56981	154.024	0	0.272037	0.001	-8.08766	2.4947e-46	1.7167e-45	PR domain containing 11	Downregulated
LOC100287072	100287072	30.3212	0	0.270211	0.001	-8.07794	1.31895e-09	2.73776e-09	ribosomal protein S6 kinase, 70kDa, polypeptide 1 pseudogene	Downregulated
DKFZP586I1420	222161	39.1041	0	0.270095	0.001	-8.07732	2.84992e-12	6.66054e-12	uncharacterized protein DKFZp586I1420	Downregulated
RB1	5925	67.766	0	0.270011	0.001	-8.07687	1.45377e-20	4.7079e-20	retinoblastoma 1	Downregulated
ZMYM4	9202	99.6154	0	0.269849	0.001	-8.07601	4.84774e-30	2.13542e-29	zinc finger, MYM-type 4	Downregulated
ALG13	79868	42.1894	0	0.269678	0.001	-8.07509	3.68442e-13	9.0254e-13	ALG13, UDP-N-acetylglucosaminyltransferase subunit	Downregulated
ZNF181	339318	41.7181	0	0.269667	0.001	-8.07504	7.28658e-13	1.75486e-12	zinc finger protein 181	Downregulated
EPN3	55040	55.8868	0	0.26963	0.001	-8.07484	5.20422e-17	1.48226e-16	epsin 3	Downregulated
LOC283587	283587	11.9558	0	0.269021	0.001	-8.07157	0.00055869	0.000825387	long intergenic non-protein coding RNA 1146	Downregulated
PODXL	5420	85.0414	0	0.268982	0.001	-8.07137	6.78748e-26	2.60813e-25	podocalyxin-like	Downregulated
KRBA2	124751	27.8785	0	0.268799	0.001	-8.07038	1.02022e-08	2.0266e-08	KRAB-A domain containing 2	Downregulated
NCAPH2	29781	47.2072	0	0.268747	0.001	-8.0701	1.21785e-14	3.16605e-14	non-SMC condensin II complex, subunit H2	Downregulated
OXCT2	64064	25.5755	0	0.268155	0.001	-8.06692	3.99028e-08	7.70218e-08	3-oxoacid CoA transferase 2	Downregulated
RAB3GAP1	22930	69.3044	0	0.267914	0.001	-8.06563	3.71696e-21	1.22754e-20	RAB3 GTPase activating protein subunit 1 (catalytic)	Downregulated
PLCH1	23007	86.3066	0	0.267579	0.001	-8.06382	3.43204e-26	1.33329e-25	phospholipase C, eta 1	Downregulated
PLA2G4B	100137049	38.5903	0	0.267326	0.001	-8.06246	5.63624e-12	1.30029e-11	phospholipase A2, group IVB (cytosolic)	Downregulated
GABRA2	2555	33.9253	0	0.266813	0.001	-8.05969	1.70515e-10	3.68463e-10	gamma-aminobutyric acid (GABA) A receptor, alpha 2	Downregulated
ESRG	790952	44.1301	0	0.266612	0.001	-8.0586	9.42018e-14	2.36351e-13	embryonic stem cell related (non-protein coding)	Downregulated
ANO9	338440	40.2644	0	0.266545	0.001	-8.05824	1.44105e-12	3.42249e-12	anoctamin 9	Downregulated
CDCA8	55143	34.9323	0	0.266331	0.001	-8.05708	8.622e-11	1.8886e-10	cell division cycle associated 8	Downregulated
AGGF1	55109	63.08	0	0.26576	0.001	-8.05398	2.2239e-19	6.89863e-19	angiogenic factor with G patch and FHA domains 1	Downregulated
ACP1	52	21.6983	0	0.265053	0.001	-8.05014	6.1041e-07	1.09744e-06	acid phosphatase 1, soluble	Downregulated
TNC	3371	120.011	0	0.264757	0.001	-8.04853	2.92608e-36	1.5431e-35	tenascin C	Downregulated
SMDT1	91689	21.9046	0	0.264672	0.001	-8.04806	6.1041e-07	1.10008e-06	single-pass membrane protein with aspartate-rich tail 1	Downregulated
LINC00265	349114	64.5665	0	0.26398	0.001	-8.04428	1.1245e-19	3.52652e-19	long intergenic non-protein coding RNA 265	Downregulated
HLA-DRB3	3125	15.8918	0	0.263881	0.001	-8.04374	3.65218e-05	5.87401e-05	major histocompatibility complex, class II, DR beta 3	Downregulated
NBEAL2	23218	122.873	0	0.263673	0.001	-8.04261	7.4813e-37	3.9998e-36	neurobeachin-like 2	Downregulated
PRCP	5547	29.6544	0	0.26205	0.001	-8.0337	2.60846e-09	5.33329e-09	prolylcarboxypeptidase (angiotensinase C)	Downregulated
CACNB2	783	54.5496	0	0.261845	0.001	-8.03257	1.02922e-16	2.89843e-16	calcium channel, voltage-dependent, beta 2 subunit	Downregulated
TLE6	79816	26.7681	0	0.261687	0.001	-8.0317	2.01766e-08	3.95625e-08	transducin-like enhancer of split 6	Downregulated
CACHD1	57685	72.5855	0	0.261596	0.001	-8.0312	4.80532e-22	1.63001e-21	cache domain containing 1	Downregulated
BRPF3	27154	82.9309	0	0.260264	0.001	-8.02383	5.25016e-25	1.95971e-24	bromodomain and PHD finger containing, 3	Downregulated
PDF	64146	15.9515	0	0.259861	0.001	-8.0216	3.65218e-05	5.90247e-05	peptide deformylase (mitochondrial)	Downregulated
DDX31	64794	44.758	0	0.259483	0.001	-8.0195	9.42018e-14	2.36153e-13	DEAD (Asp-Glu-Ala-Asp) box polypeptide 31	Downregulated
WDR81	124997	43.3648	0	0.259423	0.001	-8.01916	1.86301e-13	4.6288e-13	WD repeat domain 81	Downregulated
SMARCAL1	50485	41.9889	0	0.258456	0.001	-8.01377	7.28658e-13	1.75945e-12	SWI/SNF related, matrix associated, actin dependent regulator of chromatin, subfamily a-like 1	Downregulated
RBMXL1	494115	68.2142	0	0.257911	0.001	-8.01073	7.35092e-21	2.4019e-20	RNA binding motif protein, X-linked-like 1	Downregulated
SEMA4F	10505	76.7131	0	0.257698	0.001	-8.00954	3.14124e-23	1.10941e-22	sema domain, immunoglobulin domain (Ig), transmembrane domain (TM) and short cytoplasmic domain, (semaphorin) 4F	Downregulated
KCNV1	27012	39.8079	0	0.257671	0.001	-8.00939	2.84992e-12	6.65406e-12	potassium channel, voltage gated modifier subfamily V, member 1	Downregulated
COBL	23242	63.1692	0	0.257263	0.001	-8.0071	2.2239e-19	6.89685e-19	cordon-bleu WH2 repeat protein	Downregulated
IP6K3	117283	36.4898	0	0.256622	0.001	-8.0035	2.20444e-11	4.95246e-11	inositol hexakisphosphate kinase 3	Downregulated
DCAF4	26094	32.1093	0	0.256578	0.001	-8.00325	3.37224e-10	7.18104e-10	DDB1 and CUL4 associated factor 4	Downregulated
HOXD10	3236	24.3356	0	0.256575	0.001	-8.00324	7.89146e-08	1.49559e-07	homeobox D10	Downregulated
CD46	4179	42.4814	0	0.256487	0.001	-8.00274	3.68442e-13	9.03462e-13	CD46 molecule, complement regulatory protein	Downregulated
C5AR1	728	31.4387	0	0.256189	0.001	-8.00106	6.66918e-10	1.40695e-09	complement component 5a receptor 1	Downregulated
TMCO3	55002	41.6197	0	0.255602	0.001	-7.99776	7.28658e-13	1.75803e-12	transmembrane and coiled-coil domains 3	Downregulated
ANKRD18B	441459	50.3778	0	0.255477	0.001	-7.99705	1.57445e-15	4.24092e-15	ankyrin repeat domain 18B	Downregulated
LINC00330	144817	27.2027	0	0.255394	0.001	-7.99658	1.02022e-08	2.02962e-08	long intergenic non-protein coding RNA 330	Downregulated
PSMC6	5706	21.2449	0	0.25443	0.001	-7.99112	6.1041e-07	1.10041e-06	proteasome (prosome, macropain) 26S subunit, ATPase, 6	Downregulated
METTL10	399818	49.0288	0	0.253384	0.001	-7.98518	3.11376e-15	8.28129e-15	methyltransferase like 10	Downregulated
LINC00471	151477	17.1209	0	0.25322	0.001	-7.98425	9.33774e-06	1.56101e-05	long intergenic non-protein coding RNA 471	Downregulated
CNDP2	55748	66.0167	0	0.252832	0.001	-7.98204	2.8751e-20	9.19664e-20	CNDP dipeptidase 2 (metallopeptidase M20 family)	Downregulated
PDPR	55066	106.267	0	0.252235	0.001	-7.97862	4.0969e-32	1.92396e-31	pyruvate dehydrogenase phosphatase regulatory subunit	Downregulated
LOC728377	728377	55.6113	0	0.25164	0.001	-7.97522	5.20422e-17	1.48438e-16	Rho guanine nucleotide exchange factor (GEF) 34, pseudogene	Downregulated
MSS51	118490	32.0643	0	0.251446	0.001	-7.9741	3.37224e-10	7.19891e-10	MSS51 mitochondrial translational activator	Downregulated
PKD1P6	353511	68.8012	0	0.25111	0.001	-7.97218	7.35092e-21	2.40125e-20	polycystic kidney disease 1 (autosomal dominant) pseudogene 6	Downregulated
PACSIN2	11252	43.3961	0	0.251049	0.001	-7.97183	1.86301e-13	4.6221e-13	protein kinase C and casein kinase substrate in neurons 2	Downregulated
NMRK1	54981	14.9406	0	0.2505	0.001	-7.96867	7.22282e-05	0.000114573	nicotinamide riboside kinase 1	Downregulated
IFI35	3430	16.4201	0	0.250278	0.001	-7.96739	1.8467e-05	3.03811e-05	interferon-induced protein 35	Downregulated
DTD2	112487	35.3622	0	0.250084	0.001	-7.96627	4.35966e-11	9.70358e-11	D-tyrosyl-tRNA deacylase 2 (putative)	Downregulated
MX1	4599	37.0249	0	0.249547	0.001	-7.96317	1.11466e-11	2.5355e-11	MX dynamin-like GTPase 1	Downregulated
DHX57	90957	63.4685	0	0.249064	0.001	-7.96037	2.2239e-19	6.89329e-19	DEAH (Asp-Glu-Ala-Asp/His) box polypeptide 57	Downregulated
PPP2R3A	5523	89.2625	0	0.248812	0.001	-7.95891	4.437e-27	1.77539e-26	protein phosphatase 2, regulatory subunit B'', alpha	Downregulated
WDR11	55717	61.9507	0	0.248197	0.001	-7.95534	8.69814e-19	2.63889e-18	WD repeat domain 11	Downregulated
NDUFAF1	51103	22.5651	0	0.247838	0.001	-7.95325	3.0865e-07	5.66275e-07	NADH dehydrogenase (ubiquinone) complex I, assembly factor 1	Downregulated
STRIP1	85369	40.7861	0	0.247593	0.001	-7.95183	1.44105e-12	3.42046e-12	striatin interacting protein 1	Downregulated
CD177	57126	28.9361	0	0.246837	0.001	-7.94741	5.15868e-09	1.04268e-08	CD177 molecule	Downregulated
PNPLA7	375775	62.0361	0	0.246765	0.001	-7.94699	4.39816e-19	1.34693e-18	patatin-like phospholipase domain containing 7	Downregulated
MCMBP	79892	53.1401	0	0.246462	0.001	-7.94522	2.03548e-16	5.66181e-16	minichromosome maintenance complex binding protein	Downregulated
PHLPP1	23239	83.1217	0	0.246298	0.001	-7.94426	2.65472e-25	1.00213e-24	PH domain and leucine rich repeat protein phosphatase 1	Downregulated
FAM98A	25940	34.0272	0	0.245407	0.001	-7.93903	8.622e-11	1.8924e-10	family with sequence similarity 98, member A	Downregulated
PRR14	78994	27.6653	0	0.245273	0.001	-7.93824	1.02022e-08	2.02258e-08	proline rich 14	Downregulated
LINC00624	100289211	43.6074	0	0.24516	0.001	-7.93758	1.86301e-13	4.61733e-13	long intergenic non-protein coding RNA 624	Downregulated
MLH1	4292	30.6316	0	0.244976	0.001	-7.9365	1.31895e-09	2.74583e-09	mutL homolog 1	Downregulated
GTF2F2	2963	18.6774	0	0.243708	0.001	-7.92901	4.72158e-06	8.03867e-06	general transcription factor IIF, polypeptide 2, 30kDa	Downregulated
-	401398	50.8691	0	0.243008	0.001	-7.92486	1.57445e-15	4.23617e-15	POT1 antisense RNA 1	Downregulated
-	101926935	80.3018	0	0.242842	0.001	-7.92387	2.05344e-24	7.55908e-24	uncharacterized LOC101926935	Downregulated
FAM8A1	51439	60.6639	0	0.242222	0.001	-7.92019	1.72021e-18	5.1783e-18	family with sequence similarity 8, member A1	Downregulated
ANKHD1-EIF4EBP3	404734	106.494	0	0.242155	0.001	-7.91979	4.0969e-32	1.92697e-31	ANKHD1-EIF4EBP3 readthrough	Downregulated
AQP3	360	23.7803	0	0.241578	0.001	-7.91635	1.56067e-07	2.90822e-07	aquaporin 3 (Gill blood group)	Downregulated
DNAH5	1767	198.481	0	0.241503	0.001	-7.9159	2.32382e-59	2.16313e-58	dynein, axonemal, heavy chain 5	Downregulated
NDE1	54820	42.408	0	0.241054	0.001	-7.91321	3.68442e-13	9.00153e-13	nudE neurodevelopment protein 1	Downregulated
ALKBH3	221120	19.9474	0	0.241023	0.001	-7.91303	2.38744e-06	4.15303e-06	alkB, alkylation repair homolog 3 (E. coli)	Downregulated
ASS1	445	22.6877	0	0.240943	0.001	-7.91255	3.0865e-07	5.66188e-07	argininosuccinate synthase 1	Downregulated
ASAH2	56624	30.7119	0	0.24094	0.001	-7.91253	1.31895e-09	2.73539e-09	N-acylsphingosine amidohydrolase (non-lysosomal ceramidase) 2	Downregulated
NR3C1	2908	85.1422	0	0.240473	0.001	-7.90973	6.78748e-26	2.60313e-25	nuclear receptor subfamily 3, group C, member 1 (glucocorticoid receptor)	Downregulated
NBAS	51594	89.8906	0	0.24031	0.001	-7.90875	4.437e-27	1.77067e-26	neuroblastoma amplified sequence	Downregulated
MAB21L3	126868	40.7214	0	0.240197	0.001	-7.90807	1.44105e-12	3.41035e-12	mab-21-like 3 (C. elegans)	Downregulated
DLL1	28514	42.4559	0	0.240183	0.001	-7.90799	3.68442e-13	9.01804e-13	delta-like 1 (Drosophila)	Downregulated
LOC642776	642776	26.4057	0	0.24006	0.001	-7.90725	2.01766e-08	3.95302e-08	uncharacterized LOC642776	Downregulated
ILDR2	387597	102.612	0	0.239717	0.001	-7.90519	6.26722e-31	2.82814e-30	immunoglobulin-like domain containing receptor 2	Downregulated
FYTTD1	84248	46.0081	0	0.239668	0.001	-7.90489	2.40852e-14	6.17453e-14	forty-two-three domain containing 1	Downregulated
EXD3	54932	20.6512	0	0.238669	0.001	-7.89887	1.20719e-06	2.13805e-06	exonuclease 3'-5' domain containing 3	Downregulated
PMM2	5373	29.2601	0	0.238642	0.001	-7.8987	2.60846e-09	5.34694e-09	phosphomannomutase 2	Downregulated
AP4B1-AS1	100287722	21.6172	0	0.238533	0.001	-7.89805	6.1041e-07	1.1009e-06	AP4B1 antisense RNA 1	Downregulated
PAPSS2	9060	48.2234	0	0.237805	0.001	-7.89364	6.158e-15	1.61948e-14	3'-phosphoadenosine 5'-phosphosulfate synthase 2	Downregulated
RBBP8NL	140893	35.5584	0	0.23755	0.001	-7.89209	4.35966e-11	9.68383e-11	RBBP8 N-terminal like	Downregulated
RDH13	112724	25.1309	0	0.237354	0.001	-7.8909	3.99028e-08	7.70838e-08	retinol dehydrogenase 13 (all-trans/9-cis)	Downregulated
SLC22A18	5002	19.2627	0	0.237291	0.001	-7.89051	2.38744e-06	4.14403e-06	solute carrier family 22, member 18	Downregulated
ADAMTS7	11173	69.0095	0	0.236859	0.001	-7.88788	3.71696e-21	1.22585e-20	ADAM metallopeptidase with thrombospondin type 1 motif, 7	Downregulated
TUBA3FP	113691	24.3272	0	0.236726	0.001	-7.88707	7.89146e-08	1.49938e-07	tubulin, alpha 3f, pseudogene	Downregulated
MRPS9	64965	18.1608	0	0.236317	0.001	-7.88458	4.72158e-06	8.0478e-06	mitochondrial ribosomal protein S9	Downregulated
C11orf70	85016	27.1988	0	0.236273	0.001	-7.88431	1.02022e-08	2.02292e-08	chromosome 11 open reading frame 70	Downregulated
SH3BP1	23616	32.1109	0	0.236263	0.001	-7.88425	3.37224e-10	7.17467e-10	SH3-domain binding protein 1	Downregulated
SYNJ1	8867	86.2275	0	0.23591	0.001	-7.88209	3.43204e-26	1.33805e-25	synaptojanin 1	Downregulated
YIPF4	84272	24.4462	0	0.235705	0.001	-7.88084	7.89146e-08	1.50009e-07	Yip1 domain family, member 4	Downregulated
TMEM184A	202915	77.9441	0	0.235299	0.001	-7.87835	1.58835e-23	5.64289e-23	transmembrane protein 184A	Downregulated
CLK2P	1197	22.2802	0	0.235166	0.001	-7.87754	3.0865e-07	5.65497e-07	CDC-like kinase 2, pseudogene 1	Downregulated
SAFB2	9667	41.1306	0	0.234931	0.001	-7.87609	7.28658e-13	1.7524e-12	scaffold attachment factor B2	Downregulated
PEF1	553115	20.7118	0	0.233715	0.001	-7.86861	1.20719e-06	2.1349e-06	penta-EF-hand domain containing 1	Downregulated
IRF9	10379	20.7475	0	0.2337	0.001	-7.86851	1.20719e-06	2.13931e-06	interferon regulatory factor 9	Downregulated
GPSM1	26086	25.3666	0	0.233527	0.001	-7.86745	3.99028e-08	7.69971e-08	G-protein signaling modulator 1	Downregulated
LOC100287042	100287042	31.7904	0	0.233451	0.001	-7.86698	6.66918e-10	1.40325e-09	uncharacterized LOC100287042	Downregulated
MED7	9443	13.5314	0	0.233273	0.001	-7.86588	0.000142844	0.000221382	mediator complex subunit 7	Downregulated
EARS2	124454	48.6877	0	0.232822	0.001	-7.86308	6.158e-15	1.62019e-14	glutamyl-tRNA synthetase 2, mitochondrial	Downregulated
KLHL29	114818	62.2543	0	0.232776	0.001	-7.8628	4.39816e-19	1.34727e-18	kelch-like family member 29	Downregulated
FAM195A	84331	11.1892	0	0.232703	0.001	-7.86235	0.00055869	0.000822453	family with sequence similarity 195, member A	Downregulated
IGSF3	3321	87.993	0	0.231899	0.001	-7.85735	1.7354e-26	6.81447e-26	immunoglobulin superfamily, member 3	Downregulated
PAN2	9924	65.5039	0	0.231754	0.001	-7.85645	5.686e-20	1.8039e-19	PAN2 poly(A) specific ribonuclease subunit	Downregulated
LOC100507308	100507308	36.4981	0	0.231657	0.001	-7.85585	2.20444e-11	4.95061e-11	TCF21 antisense RNA inducing promoter demethylation	Downregulated
TNFRSF10C	8794	18.2656	0	0.23148	0.001	-7.85474	4.72158e-06	8.06153e-06	tumor necrosis factor receptor superfamily, member 10c, decoy without an intracellular domain	Downregulated
CLDN2	9075	36.2741	0	0.230682	0.001	-7.84976	2.20444e-11	4.96826e-11	claudin 2	Downregulated
SLC30A7	148867	96.1874	0	0.230651	0.001	-7.84957	3.74976e-29	1.60754e-28	solute carrier family 30 (zinc transporter), member 7	Downregulated
RNF13	11342	34.6119	0	0.230415	0.001	-7.84809	8.622e-11	1.89136e-10	ring finger protein 13	Downregulated
TXNIP	10628	36.0194	0	0.230394	0.001	-7.84796	2.20444e-11	4.96733e-11	thioredoxin interacting protein	Downregulated
-	101928446	48.8765	0	0.230353	0.001	-7.8477	6.158e-15	1.61629e-14	uncharacterized LOC101928446	Downregulated
ZNF141	7700	19.7356	0	0.229959	0.001	-7.84523	2.38744e-06	4.14762e-06	zinc finger protein 141	Downregulated
SLC19A3	80704	45.4691	0	0.229234	0.001	-7.84068	4.76326e-14	1.20644e-13	solute carrier family 19 (thiamine transporter), member 3	Downregulated
BTG2	7832	32.6233	0	0.228835	0.001	-7.83816	3.37224e-10	7.18868e-10	BTG family, member 2	Downregulated
PDE6B	5158	33.4861	0	0.228541	0.001	-7.83631	1.70515e-10	3.68131e-10	phosphodiesterase 6B, cGMP-specific, rod, beta	Downregulated
SMPD3	55512	63.3405	0	0.228495	0.001	-7.83602	2.2239e-19	6.88973e-19	sphingomyelin phosphodiesterase 3, neutral membrane (neutral sphingomyelinase II)	Downregulated
MTF1	4520	95.9581	0	0.228138	0.001	-7.83376	7.41582e-29	3.14328e-28	metal-regulatory transcription factor 1	Downregulated
GALNT11	63917	32.9681	0	0.228129	0.001	-7.83371	3.37224e-10	7.17086e-10	polypeptide N-acetylgalactosaminyltransferase 11	Downregulated
-	102723701	24.8751	0	0.227785	0.001	-7.83153	7.89146e-08	1.49796e-07	uncharacterized LOC102723701	Downregulated
SEMA4B	10509	45.1318	0	0.227231	0.001	-7.82802	4.76326e-14	1.20899e-13	sema domain, immunoglobulin domain (Ig), transmembrane domain (TM) and short cytoplasmic domain, (semaphorin) 4B	Downregulated
SLC2A2	6514	40.581	0	0.224679	0.001	-7.81172	1.44105e-12	3.41911e-12	solute carrier family 2 (facilitated glucose transporter), member 2	Downregulated
KCNK13	56659	30.4738	0	0.224654	0.001	-7.81156	1.31895e-09	2.74535e-09	potassium channel, two pore domain subfamily K, member 13	Downregulated
TRAPPC8	22878	74.2835	0	0.224606	0.001	-7.81125	1.2286e-22	4.23817e-22	trafficking protein particle complex 8	Downregulated
LRP12	29967	48.7475	0	0.223518	0.001	-7.80425	6.158e-15	1.61735e-14	low density lipoprotein receptor-related protein 12	Downregulated
SLC16A5	9121	23.5055	0	0.222921	0.001	-7.80039	1.56067e-07	2.90777e-07	solute carrier family 16 (monocarboxylate transporter), member 5	Downregulated
OPTN	10133	39.5185	0	0.2229	0.001	-7.80025	2.84992e-12	6.63214e-12	optineurin	Downregulated
LOC100129213	100129213	22.8944	0	0.222555	0.001	-7.79802	3.0865e-07	5.67055e-07	SLC39A12 antisense RNA 1	Downregulated
CHRNA5	1138	42.4933	0	0.221847	0.001	-7.79342	3.68442e-13	8.9997e-13	cholinergic receptor, nicotinic, alpha 5 (neuronal)	Downregulated
ASAH1	427	29.5238	0	0.221729	0.001	-7.79265	2.60846e-09	5.34877e-09	N-acylsphingosine amidohydrolase (acid ceramidase) 1	Downregulated
SCLY	51540	29.4883	0	0.221087	0.001	-7.78847	2.60846e-09	5.3351e-09	selenocysteine lyase	Downregulated
PLXNA2	5362	133.285	0	0.220738	0.001	-7.78619	4.13308e-40	2.42216e-39	plexin A2	Downregulated
PMS2	5395	32.9294	0	0.220531	0.001	-7.78484	3.37224e-10	7.17213e-10	PMS2 postmeiotic segregation increased 2 (S. cerevisiae)	Downregulated
UBXN2A	165324	21.9994	0	0.220298	0.001	-7.78331	6.1041e-07	1.10239e-06	UBX domain protein 2A	Downregulated
SYNC	81493	39.4303	0	0.219979	0.001	-7.78122	2.84992e-12	6.65665e-12	syncoilin, intermediate filament protein	Downregulated
ELF3	1999	36.2981	0	0.219574	0.001	-7.77856	2.20444e-11	4.9664e-11	E74-like factor 3 (ets domain transcription factor, epithelial-specific )	Downregulated
MCTP2	55784	23.0717	0	0.219437	0.001	-7.77766	1.56067e-07	2.91864e-07	multiple C2 domains, transmembrane 2	Downregulated
KDM5A	5927	124.822	0	0.218587	0.001	-7.77206	1.91279e-37	1.03978e-36	lysine (K)-specific demethylase 5A	Downregulated
AGAP11	119385	36.1626	0	0.218336	0.001	-7.77041	2.20444e-11	4.95803e-11	ankyrin repeat and GTPase domain Arf GTPase activating protein 11	Downregulated
SPATA2	9825	46.521	0	0.217359	0.001	-7.76394	2.40852e-14	6.17058e-14	spermatogenesis associated 2	Downregulated
URB2	9816	64.1292	0	0.217119	0.001	-7.76234	1.1245e-19	3.52468e-19	URB2 ribosome biogenesis 2 homolog (S. cerevisiae)	Downregulated
JDP2	122953	43.1582	0	0.216547	0.001	-7.75854	1.86301e-13	4.62593e-13	Jun dimerization protein 2	Downregulated
MYEOV	26579	24.3766	0	0.216421	0.001	-7.7577	7.89146e-08	1.49867e-07	myeloma overexpressed	Downregulated
LOC441081	441081	60.1148	0	0.216118	0.001	-7.75568	1.72021e-18	5.17182e-18	POM121 membrane glycoprotein (rat) pseudogene	Downregulated
AMPD2	271	38.8497	0	0.216104	0.001	-7.75558	5.63624e-12	1.29779e-11	adenosine monophosphate deaminase 2	Downregulated
CRYBG3	131544	122.51	0	0.215916	0.001	-7.75433	7.4813e-37	4.00693e-36	beta-gamma crystallin domain containing 3	Downregulated
FLJ35934	400579	21.1929	0	0.215641	0.001	-7.75249	6.1041e-07	1.09925e-06	FLJ35934	Downregulated
PARP10	84875	39.9162	0	0.21558	0.001	-7.75208	2.84992e-12	6.63728e-12	poly (ADP-ribose) polymerase family, member 10	Downregulated
FEZ2	9637	23.0411	0	0.215469	0.001	-7.75134	1.56067e-07	2.91319e-07	fasciculation and elongation protein zeta 2 (zygin II)	Downregulated
RPGRIP1	57096	44.6939	0	0.2153	0.001	-7.7502	9.42018e-14	2.36301e-13	retinitis pigmentosa GTPase regulator interacting protein 1	Downregulated
SAMD15	161394	22.8166	0	0.215281	0.001	-7.75008	3.0865e-07	5.66015e-07	sterile alpha motif domain containing 15	Downregulated
GTF2A1	2957	71.7048	0	0.214991	0.001	-7.74813	9.50336e-22	3.19385e-21	general transcription factor IIA, 1, 19/37kDa	Downregulated
MBD5	55777	68.2263	0	0.2149	0.001	-7.74752	7.35092e-21	2.39929e-20	methyl-CpG binding domain protein 5	Downregulated
TTC39B	158219	35.4738	0	0.214451	0.001	-7.7445	4.35966e-11	9.69818e-11	tetratricopeptide repeat domain 39B	Downregulated
LAT2	7462	23.8945	0	0.21435	0.001	-7.74382	1.56067e-07	2.91274e-07	linker for activation of T cells family, member 2	Downregulated
DRAM2	128338	21.2873	0	0.214072	0.001	-7.74195	6.1041e-07	1.09859e-06	DNA-damage regulated autophagy modulator 2	Downregulated
KSR2	283455	191.283	0	0.213294	0.001	-7.7367	2.74972e-57	2.43142e-56	kinase suppressor of ras 2	Downregulated
AXIN2	8313	47.5403	0	0.213234	0.001	-7.73629	1.21785e-14	3.15852e-14	axin 2	Downregulated
PPP2R3C	55012	18.9191	0	0.212852	0.001	-7.73371	4.72158e-06	8.04437e-06	protein phosphatase 2, regulatory subunit B'', gamma	Downregulated
-	101927446	29.8058	0	0.212375	0.001	-7.73047	2.60846e-09	5.33692e-09	uncharacterized LOC101927446	Downregulated
MS4A1	931	37.1404	0	0.212331	0.001	-7.73017	1.11466e-11	2.53598e-11	membrane-spanning 4-domains, subfamily A, member 1	Downregulated
ZNF680	340252	25.4105	0	0.211991	0.001	-7.72786	3.99028e-08	7.69476e-08	zinc finger protein 680	Downregulated
ARMCX3	51566	36.9305	0	0.211963	0.001	-7.72767	2.20444e-11	4.95432e-11	armadillo repeat containing, X-linked 3	Downregulated
LRRK1	79705	85.7979	0	0.211934	0.001	-7.72747	6.78748e-26	2.61064e-25	leucine-rich repeat kinase 1	Downregulated
ZNF407	55628	62.6655	0	0.211709	0.001	-7.72594	4.39816e-19	1.35003e-18	zinc finger protein 407	Downregulated
LRRC19	64922	40.2504	0	0.211419	0.001	-7.72396	1.44105e-12	3.42317e-12	leucine rich repeat containing 19	Downregulated
PLCXD2	257068	22.8223	0	0.211336	0.001	-7.72339	3.0865e-07	5.66535e-07	phosphatidylinositol-specific phospholipase C, X domain containing 2	Downregulated
OTOP2	92736	23.7254	0	0.211034	0.001	-7.72133	1.56067e-07	2.90958e-07	otopetrin 2	Downregulated
ZNF473	25888	50.902	0	0.210935	0.001	-7.72065	1.57445e-15	4.24378e-15	zinc finger protein 473	Downregulated
NBPF1	55672	68.5921	0	0.210761	0.001	-7.71946	7.35092e-21	2.40386e-20	neuroblastoma breakpoint family, member 1	Downregulated
NFATC2	4773	76.4004	0	0.210704	0.001	-7.71908	3.14124e-23	1.10876e-22	nuclear factor of activated T-cells, cytoplasmic, calcineurin-dependent 2	Downregulated
FAM53A	152877	30.9958	0	0.210484	0.001	-7.71757	1.31895e-09	2.74487e-09	family with sequence similarity 53, member A	Downregulated
ABCB8	11194	48.3632	0	0.210449	0.001	-7.71733	6.158e-15	1.617e-14	ATP-binding cassette, sub-family B (MDR/TAP), member 8	Downregulated
FDFT1	2222	23.6953	0	0.210236	0.001	-7.71587	1.56067e-07	2.90597e-07	farnesyl-diphosphate farnesyltransferase 1	Downregulated
OPN4	94233	26.285	0	0.210214	0.001	-7.71571	2.01766e-08	3.95109e-08	opsin 4	Downregulated
MYSM1	114803	85.9763	0	0.210156	0.001	-7.71532	6.78748e-26	2.61482e-25	Myb-like, SWIRM and MPN domains 1	Downregulated
RHOF	54509	26.9882	0	0.210074	0.001	-7.71475	2.01766e-08	3.94337e-08	ras homolog family member F (in filopodia)	Downregulated
LDLRAD4	753	89.9722	0	0.209903	0.001	-7.71358	4.437e-27	1.76891e-26	low density lipoprotein receptor class A domain containing 4	Downregulated
FKBP7	51661	31.9242	0	0.209722	0.001	-7.71233	6.66918e-10	1.4067e-09	FK506 binding protein 7	Downregulated
WNK4	65266	46.2188	0	0.20964	0.001	-7.71177	2.40852e-14	6.1719e-14	WNK lysine deficient protein kinase 4	Downregulated
ZP3	7784	14.7017	0	0.209321	0.001	-7.70958	7.22282e-05	0.000114301	zona pellucida glycoprotein 3 (sperm receptor)	Downregulated
BTN3A2	11118	40.3656	0	0.209239	0.001	-7.70901	1.44105e-12	3.4117e-12	butyrophilin, subfamily 3, member A2	Downregulated
DHODH	1723	26.7257	0	0.209148	0.001	-7.70838	2.01766e-08	3.94401e-08	dihydroorotate dehydrogenase (quinone)	Downregulated
CTGLF12P	414224	23.3655	0	0.208421	0.001	-7.70336	1.56067e-07	2.91184e-07	centaurin, gamma-like family, member 12 pseudogene	Downregulated
FAM195B	348262	12.1312	0	0.208376	0.001	-7.70305	0.000282498	0.000425519	family with sequence similarity 195, member B	Downregulated
-	101927994	38.4384	0	0.208133	0.001	-7.70136	5.63624e-12	1.29979e-11	long intergenic non-protein coding RNA 1087	Downregulated
GSTT2	2953	12.8603	0	0.207894	0.001	-7.6997	0.000282498	0.000426535	glutathione S-transferase theta 2 (gene/pseudogene)	Downregulated
NCOA1	8648	75.2858	0	0.207467	0.001	-7.69674	6.21238e-23	2.17298e-22	nuclear receptor coactivator 1	Downregulated
MAP3K12	7786	39.6351	0	0.207267	0.001	-7.69535	2.84992e-12	6.63986e-12	mitogen-activated protein kinase kinase kinase 12	Downregulated
SGMS1	259230	40.9413	0	0.206847	0.001	-7.69242	1.44105e-12	3.41844e-12	sphingomyelin synthase 1	Downregulated
TBX18	9096	66.0202	0	0.206714	0.001	-7.69149	2.8751e-20	9.19175e-20	T-box 18	Downregulated
GPRASP2	114928	40.2232	0	0.205245	0.001	-7.6812	1.44105e-12	3.41776e-12	G protein-coupled receptor associated sorting protein 2	Downregulated
C11orf30	56946	74.1788	0	0.204958	0.001	-7.67918	1.2286e-22	4.23939e-22	chromosome 11 open reading frame 30	Downregulated
ZBTB11	27107	55.272	0	0.204729	0.001	-7.67757	5.20422e-17	1.48262e-16	zinc finger and BTB domain containing 11	Downregulated
RNF7	9616	21.0169	0	0.204724	0.001	-7.67754	6.1041e-07	1.09975e-06	ring finger protein 7	Downregulated
KEL	3792	27.4621	0	0.20444	0.001	-7.67553	1.02022e-08	2.02358e-08	Kell blood group, metallo-endopeptidase	Downregulated
MVK	4598	22.1974	0	0.204351	0.001	-7.67491	3.0865e-07	5.65756e-07	mevalonate kinase	Downregulated
TCTN3	26123	24.5787	0	0.204241	0.001	-7.67413	7.89146e-08	1.49914e-07	tectonic family member 3	Downregulated
LOC100335030	100335030	33.8932	0	0.20418	0.001	-7.6737	1.70515e-10	3.68794e-10	FGFR1 oncogene partner 2 pseudogene	Downregulated
COX16	51241	17.6081	0	0.20404	0.001	-7.67271	9.33774e-06	1.56647e-05	COX16 cytochrome c oxidase assembly homolog (S. cerevisiae)	Downregulated
IFNAR2	3455	15.0318	0	0.204007	0.001	-7.67247	3.65218e-05	5.8993e-05	interferon (alpha, beta and omega) receptor 2	Downregulated
LOC284632	284632	19.8752	0	0.203986	0.001	-7.67233	2.38744e-06	4.13984e-06	uncharacterized LOC284632	Downregulated
OPRM1	4988	162.002	0	0.203914	0.001	-7.67182	1.06606e-48	7.79612e-48	opioid receptor, mu 1	Downregulated
PIAS2	9063	47.425	0	0.203746	0.001	-7.67063	1.21785e-14	3.15921e-14	protein inhibitor of activated STAT, 2	Downregulated
LOC344967	344967	17.1563	0	0.203662	0.001	-7.67003	9.33774e-06	1.55993e-05	acyl-CoA thioesterase 7 pseudogene	Downregulated
LOC644172	644172	18.7502	0	0.203578	0.001	-7.66944	4.72158e-06	8.06382e-06	mitogen-activated protein kinase 8 interacting protein 1 pseudogene	Downregulated
RHPN1	114822	40.5742	0	0.203474	0.001	-7.6687	1.44105e-12	3.42588e-12	rhophilin, Rho GTPase binding protein 1	Downregulated
RHOT2	89941	27.2591	0	0.203408	0.001	-7.66823	1.02022e-08	2.02827e-08	ras homolog family member T2	Downregulated
KCNS1	3787	48.7181	0	0.203353	0.001	-7.66784	6.158e-15	1.61877e-14	potassium voltage-gated channel, modifier subfamily S, member 1	Downregulated
-	101978785	12.705	0	0.203303	0.001	-7.66749	0.000282498	0.000423394	prostate cancer associated transcript 14 (non-protein coding)	Downregulated
MYO5B	4645	101.946	0	0.20325	0.001	-7.66711	1.23945e-30	5.5349e-30	myosin VB	Downregulated
SHQ1	55164	30.459	0	0.202911	0.001	-7.6647	1.31895e-09	2.73634e-09	SHQ1, H/ACA ribonucleoprotein assembly factor	Downregulated
DNAJC3	5611	59.7592	0	0.202867	0.001	-7.66439	3.40202e-18	1.01318e-17	DnaJ (Hsp40) homolog, subfamily C, member 3	Downregulated
PRIM1	5557	15.5427	0	0.202526	0.001	-7.66196	3.65218e-05	5.87795e-05	primase, DNA, polypeptide 1 (49kDa)	Downregulated
LOC389834	389834	87.5106	0	0.20249	0.001	-7.66171	1.7354e-26	6.83458e-26	ankyrin repeat domain 57 pseudogene	Downregulated
C11orf95	65998	59.369	0	0.202122	0.001	-7.65908	3.40202e-18	1.01193e-17	chromosome 11 open reading frame 95	Downregulated
-	101927524	22.241	0	0.202004	0.001	-7.65824	3.0865e-07	5.66621e-07	MEOX2 antisense RNA 1 (head to head)	Downregulated
LRRK2	120892	97.9762	0	0.201287	0.001	-7.65311	1.89605e-29	8.20755e-29	leucine-rich repeat kinase 2	Downregulated
MANSC1	54682	24.1402	0	0.200598	0.001	-7.64816	7.89146e-08	1.49536e-07	MANSC domain containing 1	Downregulated
-	101927774	14.2538	0	0.200188	0.001	-7.64521	7.22282e-05	0.000114376	long intergenic non-protein coding RNA 824	Downregulated
CHST10	9486	30.135	0	0.199979	0.001	-7.6437	1.31895e-09	2.73918e-09	carbohydrate sulfotransferase 10	Downregulated
GSTM2P1	442245	11.8021	0	0.199825	0.001	-7.64259	0.00055869	0.000825184	glutathione S-transferase mu 2 (muscle) pseudogene 1	Downregulated
ZNF74	7625	42.5194	0	0.199746	0.001	-7.64202	3.68442e-13	9.00703e-13	zinc finger protein 74	Downregulated
USF1	7391	18.7265	0	0.199099	0.001	-7.63734	4.72158e-06	8.06841e-06	upstream transcription factor 1	Downregulated
CRTC3	64784	55.0868	0	0.19891	0.001	-7.63597	5.20422e-17	1.4865e-16	CREB regulated transcription coactivator 3	Downregulated
CLCN7	1186	43.5318	0	0.198881	0.001	-7.63576	1.86301e-13	4.62019e-13	chloride channel, voltage-sensitive 7	Downregulated
FLJ37644	400618	18.0696	0	0.198808	0.001	-7.63523	4.72158e-06	8.06726e-06	SOX9 antisense RNA 1	Downregulated
CFL2	1073	33.0806	0	0.198787	0.001	-7.63508	1.70515e-10	3.67735e-10	cofilin 2 (muscle)	Downregulated
ZNF853	54753	37.3532	0	0.198735	0.001	-7.6347	1.11466e-11	2.53502e-11	zinc finger protein 853	Downregulated
MIR210HG	100506211	23.9687	0	0.198649	0.001	-7.63408	1.56067e-07	2.90506e-07	MIR210 host gene	Downregulated
NPDC1	56654	15.9953	0	0.197941	0.001	-7.62893	3.65218e-05	5.88821e-05	neural proliferation, differentiation and control, 1	Downregulated
MAGI3	260425	67.8151	0	0.19709	0.001	-7.62271	1.45377e-20	4.71171e-20	membrane associated guanylate kinase, WW and PDZ domain containing 3	Downregulated
METTL17	64745	17.788	0	0.196853	0.001	-7.62097	9.33774e-06	1.56145e-05	methyltransferase like 17	Downregulated
TJP3	27134	32.3128	0	0.196849	0.001	-7.62095	3.37224e-10	7.17849e-10	tight junction protein 3	Downregulated
ASIC2	40	30.0968	0	0.196777	0.001	-7.62042	1.31895e-09	2.7387e-09	acid sensing (proton gated) ion channel 2	Downregulated
BVES	11149	57.4205	0	0.196759	0.001	-7.62028	1.33059e-17	3.87246e-17	blood vessel epicardial substance	Downregulated
HECTD3	79654	37.4773	0	0.196635	0.001	-7.61938	1.11466e-11	2.54272e-11	HECT domain containing E3 ubiquitin protein ligase 3	Downregulated
LSM5	23658	22.7654	0	0.196499	0.001	-7.61838	3.0865e-07	5.65929e-07	LSM5 homolog, U6 small nuclear RNA associated (S. cerevisiae)	Downregulated
ATXN7L3B	552889	38.1896	0	0.196402	0.001	-7.61767	5.63624e-12	1.30079e-11	ataxin 7-like 3B	Downregulated
C10orf126	283080	22.3203	0	0.19596	0.001	-7.61442	3.0865e-07	5.67663e-07	chromosome 10 open reading frame 126	Downregulated
NGDN	25983	11.6308	0	0.195874	0.001	-7.61378	0.00055869	0.000821345	neuroguidin, EIF4E binding protein	Downregulated
CLOCK	9575	107.699	0	0.195168	0.001	-7.60857	2.07158e-32	9.83223e-32	clock circadian regulator	Downregulated
-	101927692	24.3101	0	0.195079	0.001	-7.60791	7.89146e-08	1.4963e-07	uncharacterized LOC101927692	Downregulated
EPHA1	2041	34.4949	0	0.194971	0.001	-7.60712	8.622e-11	1.88482e-10	EPH receptor A1	Downregulated
SGPP1	81537	34.5852	0	0.194842	0.001	-7.60616	8.622e-11	1.89205e-10	sphingosine-1-phosphate phosphatase 1	Downregulated
-	101927588	11.8791	0	0.194354	0.001	-7.60254	0.00055869	0.000825794	uncharacterized LOC101927588	Downregulated
RBM17	84991	34.1015	0	0.194313	0.001	-7.60224	8.622e-11	1.8855e-10	RNA binding motif protein 17	Downregulated
FAM86EP	348926	29.2931	0	0.194052	0.001	-7.6003	2.60846e-09	5.34603e-09	family with sequence similarity 86, member A pseudogene	Downregulated
CHIAP2	149620	28.9042	0	0.19378	0.001	-7.59828	5.15868e-09	1.03866e-08	chitinase, acidic pseudogene 2	Downregulated
CHPT1	56994	15.844	0	0.193666	0.001	-7.59743	3.65218e-05	5.87637e-05	choline phosphotransferase 1	Downregulated
LEPRE1	64175	27.3052	0	0.193105	0.001	-7.59324	1.02022e-08	2.02325e-08	prolyl 3-hydroxylase 1	Downregulated
PMS2CL	441194	17.5383	0	0.193075	0.001	-7.59302	9.33774e-06	1.56428e-05	PMS2 C-terminal like pseudogene	Downregulated
LIN52	91750	18.1349	0	0.192917	0.001	-7.59184	4.72158e-06	8.0558e-06	lin-52 DREAM MuvB core complex component	Downregulated
PLEKHG4B	153478	117.148	0	0.192799	0.001	-7.59095	2.26334e-35	1.16946e-34	pleckstrin homology domain containing, family G (with RhoGef domain) member 4B	Downregulated
JHDM1D	80853	93.1523	0	0.192651	0.001	-7.58985	2.90048e-28	1.20474e-27	lysine (K)-specific demethylase 7A	Downregulated
CUEDC2	79004	12.0507	0	0.192507	0.001	-7.58877	0.000282498	0.000425039	CUE domain containing 2	Downregulated
IKBKE	9641	33.952	0	0.191674	0.001	-7.58251	1.70515e-10	3.6833e-10	inhibitor of kappa light polypeptide gene enhancer in B-cells, kinase epsilon	Downregulated
NFYB	4801	35.0362	0	0.191573	0.001	-7.58175	4.35966e-11	9.67488e-11	nuclear transcription factor Y, beta	Downregulated
NBN	4683	46.6319	0	0.191149	0.001	-7.57855	2.40852e-14	6.17849e-14	nibrin	Downregulated
-	101669762	26.2204	0	0.19114	0.001	-7.57849	2.01766e-08	3.95496e-08	bladder cancer associated transcript 1 (non-protein coding)	Downregulated
KCTD12	115207	62.8201	0	0.190798	0.001	-7.5759	4.39816e-19	1.34865e-18	potassium channel tetramerization domain containing 12	Downregulated
USP53	54532	66.3346	0	0.190566	0.001	-7.57415	2.8751e-20	9.20645e-20	ubiquitin specific peptidase 53	Downregulated
COL22A1	169044	63.7799	0	0.190356	0.001	-7.57256	2.2239e-19	6.87908e-19	collagen, type XXII, alpha 1	Downregulated
POU2F1	5451	137.591	0	0.190292	0.001	-7.57207	2.7018e-41	1.63113e-40	POU class 2 homeobox 1	Downregulated
PLEKHA8P1	51054	18.7374	0	0.189942	0.001	-7.56942	4.72158e-06	8.06612e-06	pleckstrin homology domain containing, family A member 8 pseudogene 1	Downregulated
FBXW4	6468	22.9049	0	0.189833	0.001	-7.56859	3.0865e-07	5.67837e-07	F-box and WD repeat domain containing 4	Downregulated
ZNF629	23361	60.635	0	0.189258	0.001	-7.56421	1.72021e-18	5.17571e-18	zinc finger protein 629	Downregulated
FGFR2	2263	27.5443	0	0.188805	0.001	-7.56075	1.02022e-08	2.02526e-08	fibroblast growth factor receptor 2	Downregulated
ZNF43	7594	50.8328	0	0.188655	0.001	-7.55961	1.57445e-15	4.23238e-15	zinc finger protein 43	Downregulated
RNF5	6048	11.5305	0	0.188489	0.001	-7.55834	0.00055869	0.000825591	ring finger protein 5, E3 ubiquitin protein ligase	Downregulated
FBXL6	26233	17.5084	0	0.188047	0.001	-7.55495	9.33774e-06	1.5621e-05	F-box and leucine-rich repeat protein 6	Downregulated
STAT4	6775	27.4407	0	0.187552	0.001	-7.55115	1.02022e-08	2.02459e-08	signal transducer and activator of transcription 4	Downregulated
RNF11	26994	30.2531	0	0.187008	0.001	-7.54696	1.31895e-09	2.7425e-09	ring finger protein 11	Downregulated
KIF26A	26153	66.4075	0	0.186671	0.001	-7.54435	2.8751e-20	9.21137e-20	kinesin family member 26A	Downregulated
ZNF862	643641	67.7742	0	0.186203	0.001	-7.54073	1.45377e-20	4.69903e-20	zinc finger protein 862	Downregulated
CIDEC	63924	11.76	0	0.186137	0.001	-7.54022	0.00055869	0.000820943	cell death-inducing DFFA-like effector c	Downregulated
KIAA0355	9710	65.39	0	0.185851	0.001	-7.538	5.686e-20	1.80342e-19	KIAA0355	Downregulated
CACNA1A	773	84.0567	0	0.184819	0.001	-7.52997	1.34234e-25	5.11709e-25	calcium channel, voltage-dependent, P/Q type, alpha 1A subunit	Downregulated
METTL8	79828	79.196	0	0.184399	0.001	-7.52669	4.06104e-24	1.47638e-23	methyltransferase like 8	Downregulated
VWA8	23078	69.4741	0	0.184041	0.001	-7.52388	3.71696e-21	1.22889e-20	von Willebrand factor A domain containing 8	Downregulated
HLA-DRB4	3126	11.3972	0	0.183616	0.001	-7.52055	0.00055869	0.000824475	major histocompatibility complex, class II, DR beta 4	Downregulated
TTC25	83538	17.9128	0	0.183348	0.001	-7.51844	9.33774e-06	1.5645e-05	tetratricopeptide repeat domain 25	Downregulated
SOGA2	23255	58.787	0	0.183339	0.001	-7.51837	6.72808e-18	1.98552e-17	microtubule crosslinking factor 1	Downregulated
RASL10B	91608	30.9253	0	0.183327	0.001	-7.51828	1.31895e-09	2.73587e-09	RAS-like, family 10, member B	Downregulated
BABAM1	29086	12.2133	0	0.18321	0.001	-7.51735	0.000282498	0.00042472	BRISC and BRCA1 A complex member 1	Downregulated
FAM169B	283777	31.7243	0	0.183192	0.001	-7.51721	6.66918e-10	1.40423e-09	family with sequence similarity 169, member B	Downregulated
NANS	54187	11.9743	0	0.182956	0.001	-7.51535	0.00055869	0.000820642	N-acetylneuraminic acid synthase	Downregulated
CHM	1121	27.3797	0	0.182718	0.001	-7.51347	1.02022e-08	2.03029e-08	choroideremia (Rab escort protein 1)	Downregulated
KLB	152831	58.4355	0	0.182633	0.001	-7.5128	6.72808e-18	1.98503e-17	klotho beta	Downregulated
PAQR4	124222	26.904	0	0.182436	0.001	-7.51125	2.01766e-08	3.94144e-08	progestin and adipoQ receptor family member IV	Downregulated
KAT8	84148	14.7207	0	0.182407	0.001	-7.51102	7.22282e-05	0.000114588	K(lysine) acetyltransferase 8	Downregulated
NUDT16	131870	58.7072	0	0.18234	0.001	-7.51049	6.72808e-18	1.97968e-17	nudix (nucleoside diphosphate linked moiety X)-type motif 16	Downregulated
COASY	80347	20.8197	0	0.182195	0.001	-7.50934	1.20719e-06	2.13963e-06	CoA synthase	Downregulated
ZNF100	163227	42.8921	0	0.182124	0.001	-7.50878	3.68442e-13	9.03831e-13	zinc finger protein 100	Downregulated
TMEM56	148534	66.2456	0	0.181792	0.001	-7.50614	2.8751e-20	9.23354e-20	transmembrane protein 56	Downregulated
FBF1	85302	36.84	0	0.181528	0.001	-7.50405	2.20444e-11	4.96361e-11	Fas (TNFRSF6) binding factor 1	Downregulated
TRUB1	142940	32.5221	0	0.181492	0.001	-7.50376	3.37224e-10	7.19124e-10	TruB pseudouridine (psi) synthase family member 1	Downregulated
THBS2	7058	56.306	0	0.181394	0.001	-7.50298	2.63148e-17	7.57039e-17	thrombospondin 2	Downregulated
ETV5	2119	39.1006	0	0.181347	0.001	-7.50261	2.84992e-12	6.65277e-12	ets variant 5	Downregulated
CYB5RL	606495	33.7717	0	0.181053	0.001	-7.50027	1.70515e-10	3.68264e-10	cytochrome b5 reductase-like	Downregulated
C6orf136	221545	13.5826	0	0.180714	0.001	-7.49756	0.000142844	0.000220926	chromosome 6 open reading frame 136	Downregulated
CEP68	23177	55.8775	0	0.180659	0.001	-7.49713	5.20422e-17	1.48016e-16	centrosomal protein 68kDa	Downregulated
KSR1	8844	43.1661	0	0.180337	0.001	-7.49455	1.86301e-13	4.62688e-13	kinase suppressor of ras 1	Downregulated
C19orf66	55337	20.1962	0	0.18032	0.001	-7.49442	1.20719e-06	2.13679e-06	chromosome 19 open reading frame 66	Downregulated
MOG	4340	16.9957	0	0.180292	0.001	-7.49419	1.8467e-05	3.03562e-05	myelin oligodendrocyte glycoprotein	Downregulated
C6orf170	221322	57.7709	0	0.179903	0.001	-7.49108	1.33059e-17	3.87058e-17	TBC1 domain family, member 32	Downregulated
LANCL1	10314	42.8101	0	0.179881	0.001	-7.4909	3.68442e-13	9.03277e-13	LanC lantibiotic synthetase component C-like 1 (bacterial)	Downregulated
DFNA5	1687	21.3844	0	0.17935	0.001	-7.48663	6.1041e-07	1.1014e-06	deafness, autosomal dominant 5	Downregulated
ZNF506	440515	30.3844	0	0.178335	0.001	-7.47845	1.31895e-09	2.73445e-09	zinc finger protein 506	Downregulated
PTPN12	5782	29.0214	0	0.178258	0.001	-7.47783	2.60846e-09	5.34238e-09	protein tyrosine phosphatase, non-receptor type 12	Downregulated
CSRP3	8048	13.5941	0	0.177993	0.001	-7.47568	0.000142844	0.000220897	cysteine and glycine-rich protein 3 (cardiac LIM protein)	Downregulated
TUBA3D	113457	15.302	0	0.17797	0.001	-7.47549	3.65218e-05	5.8748e-05	tubulin, alpha 3d	Downregulated
STXBP5-AS1	729178	28.736	0	0.177629	0.001	-7.47272	5.15868e-09	1.04145e-08	STXBP5 antisense RNA 1	Downregulated
PXDN	7837	64.0424	0	0.177235	0.001	-7.46952	1.1245e-19	3.51642e-19	peroxidasin	Downregulated
CEACAM20	125931	15.2033	0	0.176914	0.001	-7.4669	3.65218e-05	5.88031e-05	carcinoembryonic antigen-related cell adhesion molecule 20	Downregulated
CEP85L	387119	69.5635	0	0.176871	0.001	-7.46656	3.71696e-21	1.22821e-20	centrosomal protein 85kDa-like	Downregulated
STX17	55014	64.3244	0	0.176802	0.001	-7.46599	1.1245e-19	3.53021e-19	syntaxin 17	Downregulated
EXPH5	23086	95.071	0	0.176747	0.001	-7.46554	7.41582e-29	3.14661e-28	exophilin 5	Downregulated
NOS3	4846	23.5342	0	0.176307	0.001	-7.46195	1.56067e-07	2.91093e-07	nitric oxide synthase 3 (endothelial cell)	Downregulated
UNC119B	84747	40.8917	0	0.176237	0.001	-7.46137	1.44105e-12	3.41979e-12	unc-119 homolog B (C. elegans)	Downregulated
-	101927359	26.185	0	0.175674	0.001	-7.45676	2.01766e-08	3.94016e-08	uncharacterized LOC101927359	Downregulated
RAB43	339122	42.4202	0	0.175671	0.001	-7.45673	3.68442e-13	9.042e-13	RAB43, member RAS oncogene family	Downregulated
CLEC4E	26253	19.8367	0	0.175538	0.001	-7.45564	2.38744e-06	4.15363e-06	C-type lectin domain family 4, member E	Downregulated
LOC283761	283761	21.73	0	0.175266	0.001	-7.4534	6.1041e-07	1.10256e-06	long intergenic non-protein coding RNA 928	Downregulated
-	101929623	21.9337	0	0.174898	0.001	-7.45037	6.1041e-07	1.10107e-06	long intergenic non-protein coding RNA 1215	Downregulated
SLC28A2	9153	22.5672	0	0.1748	0.001	-7.44956	3.0865e-07	5.67576e-07	solute carrier family 28 (concentrative nucleoside transporter), member 2	Downregulated
C6orf120	387263	38.7554	0	0.174741	0.001	-7.44907	5.63624e-12	1.29904e-11	chromosome 6 open reading frame 120	Downregulated
WDR45	11152	17.5766	0	0.174532	0.001	-7.44735	9.33774e-06	1.56668e-05	WD repeat domain 45	Downregulated
HSPA2	3306	25.6531	0	0.174516	0.001	-7.44722	3.99028e-08	7.69353e-08	heat shock 70kDa protein 2	Downregulated
CRIPAK	285464	40.9499	0	0.174346	0.001	-7.44581	1.44105e-12	3.41439e-12	cysteine-rich PAK1 inhibitor	Downregulated
C14orf105	55195	29.3504	0	0.173937	0.001	-7.44242	2.60846e-09	5.34512e-09	chromosome 14 open reading frame 105	Downregulated
MST1P2	11209	24.0448	0	0.173545	0.001	-7.43917	7.89146e-08	1.49701e-07	macrophage stimulating 1 (hepatocyte growth factor-like) pseudogene 2	Downregulated
MNT	4335	44.3994	0	0.173514	0.001	-7.43891	9.42018e-14	2.35858e-13	MAX network transcriptional repressor	Downregulated
RSC1A1	6248	16.8086	0	0.173357	0.001	-7.4376	1.8467e-05	3.03645e-05	regulatory solute carrier protein, family 1, member 1	Downregulated
GLTPD1	80772	19.8847	0	0.173133	0.001	-7.43574	2.38744e-06	4.14103e-06	ceramide-1-phosphate transfer protein	Downregulated
CCDC144B	284047	79.372	0	0.172929	0.001	-7.43404	4.06104e-24	1.47728e-23	coiled-coil domain containing 144B (pseudogene)	Downregulated
KIAA1211	57482	63.84	0	0.172887	0.001	-7.43369	2.2239e-19	6.88618e-19	KIAA1211	Downregulated
PABPC1L2B	645974	19.8989	0	0.172701	0.001	-7.43213	2.38744e-06	4.14882e-06	poly(A) binding protein, cytoplasmic 1-like 2B	Downregulated
SLC25A5	292	314.341	0.358981	4.46442	0.0258717	-7.43095	1.02857e-93	1.95739e-92	solute carrier family 25 (mitochondrial carrier; adenine nucleotide translocator), member 5	Downregulated
NEXN-AS1	374987	20.7026	0	0.17241	0.001	-7.4297	1.20719e-06	2.13837e-06	NEXN antisense RNA 1	Downregulated
MST1R	4486	41.877	0	0.171696	0.001	-7.42371	7.28658e-13	1.75592e-12	macrophage stimulating 1 receptor	Downregulated
AMER1	139285	75.9522	0	0.170781	0.001	-7.416	6.21238e-23	2.16855e-22	APC membrane recruitment protein 1	Downregulated
SACS	26278	135.932	0	0.170329	0.001	-7.41218	1.05673e-40	6.27867e-40	sacsin molecular chaperone	Downregulated
MRM1	79922	16.4851	0	0.170298	0.001	-7.41192	1.8467e-05	3.03603e-05	mitochondrial rRNA methyltransferase 1 homolog (S. cerevisiae)	Downregulated
BCR	613	60.7094	0	0.169697	0.001	-7.40682	1.72021e-18	5.1796e-18	breakpoint cluster region	Downregulated
NABP1	64859	34.3629	0	0.169146	0.001	-7.40213	8.622e-11	1.88963e-10	nucleic acid binding protein 1	Downregulated
ABCA9	10350	56.0959	0	0.168886	0.001	-7.39991	2.63148e-17	7.57765e-17	ATP-binding cassette, sub-family A (ABC1), member 9	Downregulated
ARIH1	25820	46.7562	0	0.168733	0.001	-7.3986	2.40852e-14	6.16795e-14	ariadne RBR E3 ubiquitin protein ligase 1	Downregulated
LINC00617	100507043	28.4564	0	0.168638	0.001	-7.39779	5.15868e-09	1.04023e-08	TCL1 upstream neural differentiation-associated RNA	Downregulated
FAM98C	147965	11.3179	0	0.168312	0.001	-7.39499	0.00055869	0.000823564	family with sequence similarity 98, member C	Downregulated
TAF7L	54457	19.4072	0	0.168202	0.001	-7.39405	2.38744e-06	4.14822e-06	TAF7-like RNA polymerase II, TATA box binding protein (TBP)-associated factor, 50kDa	Downregulated
MTMR3	8897	78.8065	0	0.168139	0.001	-7.39351	8.03142e-24	2.8797e-23	myotubularin related protein 3	Downregulated
NCBP2	22916	17.7069	0	0.167823	0.001	-7.3908	9.33774e-06	1.56014e-05	nuclear cap binding protein subunit 2, 20kDa	Downregulated
SEMA6B	10501	34.9325	0	0.167808	0.001	-7.39067	8.622e-11	1.88379e-10	sema domain, transmembrane domain (TM), and cytoplasmic domain, (semaphorin) 6B	Downregulated
ZNF584	201514	20.1575	0	0.167797	0.001	-7.39057	1.20719e-06	2.14058e-06	zinc finger protein 584	Downregulated
MAP1A	4130	90.6453	0	0.167418	0.001	-7.38731	2.24354e-27	9.05256e-27	microtubule-associated protein 1A	Downregulated
SHISA8	440829	12.1993	0	0.166519	0.001	-7.37954	0.000282498	0.000423659	shisa family member 8	Downregulated
GRPEL1	80273	13.1588	0	0.165984	0.001	-7.3749	0.000142844	0.000220104	GrpE-like 1, mitochondrial (E. coli)	Downregulated
TTC28	23331	103.019	0	0.165717	0.001	-7.37258	3.16898e-31	1.44469e-30	tetratricopeptide repeat domain 28	Downregulated
ZFP3	124961	43.4872	0	0.16498	0.001	-7.36615	1.86301e-13	4.61543e-13	ZFP3 zinc finger protein	Downregulated
ATF7	11016	58.1085	0	0.164637	0.001	-7.36314	6.72808e-18	1.98601e-17	activating transcription factor 7	Downregulated
RASSF1	11186	14.3929	0	0.16437	0.001	-7.3608	7.22282e-05	0.000114512	Ras association (RalGDS/AF-6) domain family member 1	Downregulated
ZEB1-AS1	220930	19.1258	0	0.163594	0.001	-7.35398	2.38744e-06	4.14463e-06	ZEB1 antisense RNA 1	Downregulated
CELSR3	1951	103.175	0	0.163483	0.001	-7.353	3.16898e-31	1.44359e-30	cadherin, EGF LAG seven-pass G-type receptor 3	Downregulated
[truncated: 3,330 more rows]
