# Supplementary material for: Downregulated genes by silencing MYC pathway identified with RNA-SEQ analysis as potential prognostic biomarkers in gastric adenocarcinoma
Source: Aging (Albany NY). 2020 Dec 22;12(24):24651–70. doi: 10.18632/aging.202260 (PMC7803532; doi:10.18632/aging.202260)
Supplement: Supplementary Table 2 [file aging-12-202260-s002.xlsx]

## Sheet: Supplementary Table S2.
Supplementary Table 2. A total of 4,117 DEGs identified in the ACP03 lineage, of which 843 DEGs with a downregulated profile and 3,274 with an upregulated profile. MYC-siRNA: (3M) vs. Control-siRNA: (3C)
Symbol	gene-ID	N0.3C	N0.3M	N0.3C-NE	N0.3M-NE	Log2 Ratio(N0.3M-NE/N0.3C-NE)	p-value	FDR	Description	Expression Profile
BLOC1S1	2647	29.0442	0	5.09955	0.001	-12.3162	3.61218e-09	2.04289e-08	biogenesis of lysosomal organelles complex-1, subunit 1	Downregulated
PA2G4	5036	112.12	0	4.29553	0.001	-12.0686	2.33388e-33	1.56013e-31	proliferation-associated 2G4, 38kDa	Downregulated
ATF1	466	100.52	0	4.06471	0.001	-11.9889	7.3347e-30	3.60343e-28	activating transcription factor 1	Downregulated
PRCC	5546	81.9007	0	3.87753	0.001	-11.9209	2.52802e-24	7.8891e-23	papillary renal cell carcinoma (translocation-associated)	Downregulated
FAM50A	9130	50.2064	0	3.73602	0.001	-11.8673	2.73832e-15	3.30354e-14	family with sequence similarity 50, member A	Downregulated
PPWD1	23398	69.3452	0	3.50759	0.001	-11.7763	7.94486e-21	1.73553e-19	peptidylprolyl isomerase domain and WD repeat containing 1	Downregulated
TBP	6908	63.367	0	3.34829	0.001	-11.7092	4.45388e-19	8.18083e-18	TATA box binding protein	Downregulated
SNRPE	6635	52.446	0	3.29159	0.001	-11.6846	7.15486e-16	9.22291e-15	small nuclear ribonucleoprotein polypeptide E	Downregulated
PCGF6	84108	64.9776	0	3.25881	0.001	-11.6701	2.27664e-19	4.23899e-18	polycomb group ring finger 6	Downregulated
LY6E	4061	36.1137	0	3.0999	0.001	-11.598	3.29362e-11	2.43744e-10	lymphocyte antigen 6 complex, locus E	Downregulated
REEP2	51308	67.0063	0	3.08384	0.001	-11.5905	3.04068e-20	6.19944e-19	receptor accessory protein 2	Downregulated
ALDH9A1	223	75.7465	0	3.06911	0.001	-11.5836	1.41721e-22	3.68083e-21	aldehyde dehydrogenase 9 family, member A1	Downregulated
ENY2	56943	87.5873	0	3.00807	0.001	-11.5546	4.5095e-26	1.68699e-24	enhancer of yellow 2 homolog (Drosophila)	Downregulated
DDRGK1	65992	37.4219	0	2.93902	0.001	-11.5211	1.68357e-11	1.29366e-10	DDRGK domain containing 1	Downregulated
DDX27	55661	78.0721	0	2.91558	0.001	-11.5096	1.89281e-23	5.40999e-22	DEAD (Asp-Glu-Ala-Asp) box polypeptide 27	Downregulated
RAE1	8480	51.1279	0	2.85662	0.001	-11.4801	1.39973e-15	1.74901e-14	ribonucleic acid export 1	Downregulated
TMEM5	10329	55.2476	0	2.8484	0.001	-11.4759	9.55596e-17	1.37043e-15	transmembrane protein 5	Downregulated
ERGIC2	51290	49.6577	0	2.83214	0.001	-11.4677	5.35706e-15	6.23529e-14	ERGIC and golgi 2	Downregulated
STARD10	10809	54.5542	0	2.78463	0.001	-11.4433	1.86946e-16	2.56668e-15	StAR-related lipid transfer (START) domain containing 10	Downregulated
PNN	5411	96.1279	0	2.69465	0.001	-11.3959	1.07436e-28	4.99721e-27	pinin, desmosome associated protein	Downregulated
ARF5	381	28.8217	0	2.68735	0.001	-11.392	7.0666e-09	3.85402e-08	ADP-ribosylation factor 5	Downregulated
BBC3	27113	35.5479	0	2.66494	0.001	-11.3799	6.44342e-11	4.58803e-10	BCL2 binding component 3	Downregulated
HMGN3	9324	24.1356	0	2.64511	0.001	-11.3691	1.03509e-07	4.73533e-07	high mobility group nucleosomal binding domain 3	Downregulated
CSRP2BP	57325	82.1506	0	2.63633	0.001	-11.3643	1.29223e-24	4.12737e-23	CSRP2 binding protein	Downregulated
NT5C3A	51251	43.4921	0	2.55883	0.001	-11.3213	3.00316e-13	2.87013e-12	5'-nucleotidase, cytosolic IIIA	Downregulated
UBE2T	29089	23.0579	0	2.52699	0.001	-11.3032	2.02498e-07	8.81865e-07	ubiquitin-conjugating enzyme E2T	Downregulated
SP4	6671	144.087	0	2.50191	0.001	-11.2888	1.10137e-42	1.32088e-40	Sp4 transcription factor	Downregulated
ELOF1	84337	24.8534	0	2.47077	0.001	-11.2707	1.03509e-07	4.7371e-07	elongation factor 1 homolog (S. cerevisiae)	Downregulated
RARS	5917	52.3216	0	2.46322	0.001	-11.2663	7.15486e-16	9.24239e-15	arginyl-tRNA synthetase	Downregulated
HTR7	3363	77.7397	0	2.39679	0.001	-11.2269	3.70296e-23	1.03185e-21	5-hydroxytryptamine (serotonin) receptor 7, adenylate cyclase-coupled	Downregulated
HNRNPH2	3188	55.4716	0	2.36175	0.001	-11.2056	9.55596e-17	1.37204e-15	heterogeneous nuclear ribonucleoprotein H2 (H')	Downregulated
HSPB11	51668	13.5134	0	2.32797	0.001	-11.1849	0.00016628	0.000458029	heat shock protein family B (small), member 11	Downregulated
IDUA	3425	50.4251	0	2.3091	0.001	-11.1731	2.73832e-15	3.3068e-14	iduronidase, alpha-L-	Downregulated
PTRH2	51651	17.5548	0	2.24413	0.001	-11.1319	1.1352e-05	3.74715e-05	peptidyl-tRNA hydrolase 2	Downregulated
C11orf49	79096	26.5966	0	2.18432	0.001	-11.093	2.70454e-08	1.34984e-07	chromosome 11 open reading frame 49	Downregulated
PPIH	10465	17.1378	0	2.16605	0.001	-11.0809	1.1352e-05	3.75018e-05	peptidylprolyl isomerase H (cyclophilin H)	Downregulated
SUGT1	10910	37.5439	0	2.11725	0.001	-11.048	1.68357e-11	1.29204e-10	SGT1, suppressor of G2 allele of SKP1 (S. cerevisiae)	Downregulated
DCTN6	10671	23.1454	0	2.09971	0.001	-11.036	2.02498e-07	8.82493e-07	dynactin 6	Downregulated
ELF1	1997	73.1669	0	2.08766	0.001	-11.0277	5.42398e-22	1.31912e-20	E74-like factor 1 (ets domain transcription factor)	Downregulated
ST3GAL3	6487	47.1557	0	2.08352	0.001	-11.0248	2.05028e-14	2.24741e-13	ST3 beta-galactoside alpha-2,3-sialyltransferase 3	Downregulated
IMP4	92856	21.6702	0	2.0626	0.001	-11.0102	7.75006e-07	3.07414e-06	IMP4, U3 small nucleolar ribonucleoprotein	Downregulated
PPAPDC1B	84513	17.6365	0	2.04313	0.001	-10.9966	1.1352e-05	3.74008e-05	phosphatidic acid phosphatase type 2 domain containing 1B	Downregulated
CINP	51550	19.823	0	2.03711	0.001	-10.9923	2.96612e-06	1.07224e-05	cyclin-dependent kinase 2 interacting protein	Downregulated
SLC16A13	201232	35.428	0	2.03325	0.001	-10.9896	6.44342e-11	4.58003e-10	solute carrier family 16, member 13	Downregulated
COG7	91949	58.5155	0	2.01198	0.001	-10.9744	1.27629e-17	2.03028e-16	component of oligomeric golgi complex 7	Downregulated
CEP95	90799	53.4442	0	2.00031	0.001	-10.966	3.65728e-16	4.85244e-15	centrosomal protein 95kDa	Downregulated
NOSIP	51070	26.7963	0	1.99695	0.001	-10.9636	2.70454e-08	1.35039e-07	nitric oxide synthase interacting protein	Downregulated
TCTEX1D2	255758	13.4138	0	1.99044	0.001	-10.9589	0.00016628	0.00045927	Tctex1 domain containing 2	Downregulated
RAPGEF6	51735	86.968	0	1.98008	0.001	-10.9513	8.82208e-26	3.21192e-24	Rap guanine nucleotide exchange factor (GEF) 6	Downregulated
SLC37A3	84255	65.3017	0	1.97543	0.001	-10.948	1.16374e-19	2.20713e-18	solute carrier family 37, member 3	Downregulated
RCN2	5955	43.0863	0	1.97394	0.001	-10.9469	3.00316e-13	2.87237e-12	reticulocalbin 2, EF-hand calcium binding domain	Downregulated
FAM217B	63939	88.6276	0	1.94684	0.001	-10.9269	2.30508e-26	8.92343e-25	family with sequence similarity 217, member B	Downregulated
CAPS	828	29.1562	0	1.93618	0.001	-10.919	3.61218e-09	2.03912e-08	calcyphosine	Downregulated
PIP5K1B	8395	51.2706	0	1.93552	0.001	-10.9185	1.39973e-15	1.74545e-14	phosphatidylinositol-4-phosphate 5-kinase, type I, beta	Downregulated
UFL1	23376	80.5858	0	1.92943	0.001	-10.914	4.94564e-24	1.48284e-22	UFM1-specific ligase 1	Downregulated
HYPK	25764	24.5309	0	1.85006	0.001	-10.8534	1.03509e-07	4.72826e-07	huntingtin interacting protein K	Downregulated
COG1	9382	55.352	0	1.84519	0.001	-10.8496	9.55596e-17	1.36883e-15	component of oligomeric golgi complex 1	Downregulated
TERF2	7014	54.491	0	1.84027	0.001	-10.8457	1.86946e-16	2.56093e-15	telomeric repeat binding factor 2	Downregulated
C19orf60	55049	14.9279	0	1.83825	0.001	-10.8441	8.49962e-05	0.000245922	chromosome 19 open reading frame 60	Downregulated
TCEAL1	9338	21.5681	0	1.82191	0.001	-10.8312	7.75006e-07	3.07913e-06	transcription elongation factor A (SII)-like 1	Downregulated
FABP5	2171	13.2113	0	1.81082	0.001	-10.8224	0.00016628	0.000457308	fatty acid binding protein 5 (psoriasis-associated)	Downregulated
TMEM59L	25789	30.4236	0	1.80579	0.001	-10.8184	1.8464e-09	1.08696e-08	transmembrane protein 59-like	Downregulated
C5orf30	90355	52.5073	0	1.75443	0.001	-10.7768	7.15486e-16	9.23264e-15	chromosome 5 open reading frame 30	Downregulated
IK	3550	33.6357	0	1.74612	0.001	-10.7699	2.46604e-10	1.60891e-09	IK cytokine, down-regulator of HLA II	Downregulated
TRAPPC1	58485	12.9909	0	1.73845	0.001	-10.7636	0.0003253	0.000841488	trafficking protein particle complex 1	Downregulated
ADSSL1	122622	30.2558	0	1.73741	0.001	-10.7627	1.8464e-09	1.08958e-08	adenylosuccinate synthase like 1	Downregulated
LSM14B	149986	44.9159	0	1.73735	0.001	-10.7627	1.5351e-13	1.52303e-12	LSM14B, SCD6 homolog B (S. cerevisiae)	Downregulated
PHYHIPL	84457	61.3819	0	1.73272	0.001	-10.7588	1.7046e-18	2.97042e-17	phytanoyl-CoA 2-hydroxylase interacting protein-like	Downregulated
TLCD1	116238	15.0064	0	1.70208	0.001	-10.7331	4.34468e-05	0.000133037	TLC domain containing 1	Downregulated
MZT2B	80097	15.9295	0	1.68697	0.001	-10.7202	4.34468e-05	0.000132938	mitotic spindle organizing protein 2B	Downregulated
MIR22HG	84981	44.1892	0	1.68271	0.001	-10.7166	1.5351e-13	1.51687e-12	MIR22 host gene	Downregulated
DNAJA1	3301	25.3028	0	1.67365	0.001	-10.7088	5.29098e-08	2.53921e-07	DnaJ (Hsp40) homolog, subfamily A, member 1	Downregulated
ICT1	3396	14.8368	0	1.67341	0.001	-10.7086	8.49962e-05	0.000245806	immature colon carcinoma transcript 1	Downregulated
SLC4A1AP	22950	48.3707	0	1.64129	0.001	-10.6806	1.04802e-14	1.17835e-13	solute carrier family 4 (anion exchanger), member 1, adaptor protein	Downregulated
SCG5	6447	19.9195	0	1.63728	0.001	-10.6771	2.96612e-06	1.07161e-05	secretogranin V	Downregulated
YIPF3	25844	25.6458	0	1.63715	0.001	-10.677	5.29098e-08	2.53325e-07	Yip1 domain family, member 3	Downregulated
FBXL14	144699	33.7066	0	1.61944	0.001	-10.6613	2.46604e-10	1.61235e-09	F-box and leucine-rich repeat protein 14	Downregulated
LDLRAD3	143458	62.5252	0	1.61542	0.001	-10.6577	8.71326e-19	1.56519e-17	low density lipoprotein receptor class A domain containing 3	Downregulated
SLC29A3	55315	31.0056	0	1.59968	0.001	-10.6436	9.4381e-10	5.78438e-09	solute carrier family 29 (equilibrative nucleoside transporter), member 3	Downregulated
RBM28	55131	37.7876	0	1.59534	0.001	-10.6396	1.68357e-11	1.29448e-10	RNA binding motif protein 28	Downregulated
TBC1D17	79735	35.6181	0	1.5703	0.001	-10.6168	6.44342e-11	4.5827e-10	TBC1 domain family, member 17	Downregulated
RAB23	51715	69.825	0	1.55314	0.001	-10.601	7.94486e-21	1.73243e-19	RAB23, member RAS oncogene family	Downregulated
CRMP1	1400	47.117	0	1.55063	0.001	-10.5986	2.05028e-14	2.25549e-13	collapsin response mediator protein 1	Downregulated
ELK4	2005	46.2873	0	1.52184	0.001	-10.5716	4.011e-14	4.22988e-13	ELK4, ETS-domain protein (SRF accessory protein 1)	Downregulated
ZNF764	92595	42.0125	0	1.51106	0.001	-10.5613	5.87518e-13	5.45718e-12	zinc finger protein 764	Downregulated
PSPC1	55269	26.1682	0	1.50268	0.001	-10.5533	2.70454e-08	1.35371e-07	paraspeckle component 1	Downregulated
LOXL3	84695	44.331	0	1.49865	0.001	-10.5494	1.5351e-13	1.5181e-12	lysyl oxidase-like 3	Downregulated
TPD52L2	7165	32.301	0	1.49069	0.001	-10.5418	4.82438e-10	3.02339e-09	tumor protein D52-like 2	Downregulated
KCNE4	23704	47.0086	0	1.49051	0.001	-10.5416	2.05028e-14	2.24942e-13	potassium channel, voltage gated subfamily E regulatory beta subunit 4	Downregulated
TRAPPC4	51399	17.7075	0	1.48582	0.001	-10.537	1.1352e-05	3.74614e-05	trafficking protein particle complex 4	Downregulated
PSMD14	10213	25.3437	0	1.485	0.001	-10.5362	5.29098e-08	2.54121e-07	proteasome (prosome, macropain) 26S subunit, non-ATPase, 14	Downregulated
GPKOW	27238	24.7292	0	1.43894	0.001	-10.4908	1.03509e-07	4.71418e-07	G patch domain and KOW motifs	Downregulated
GPATCH1	55094	48.1935	0	1.43747	0.001	-10.4893	1.04802e-14	1.17727e-13	G patch domain containing 1	Downregulated
GPAM	57678	90.2516	0	1.42187	0.001	-10.4736	6.02286e-27	2.4724e-25	glycerol-3-phosphate acyltransferase, mitochondrial	Downregulated
ZNF350	59348	32.6972	0	1.40519	0.001	-10.4565	4.82438e-10	3.02185e-09	zinc finger protein 350	Downregulated
TMEM223	79064	13.0455	0	1.40071	0.001	-10.4519	0.00016628	0.000457926	transmembrane protein 223	Downregulated
PRIM1	5557	20.1423	0	1.39371	0.001	-10.4447	1.51617e-06	5.71917e-06	primase, DNA, polypeptide 1 (49kDa)	Downregulated
SPIN4	139886	56.6116	0	1.39084	0.001	-10.4417	4.88464e-17	7.19059e-16	spindlin family, member 4	Downregulated
MED26	9441	43.63	0	1.386	0.001	-10.4367	3.00316e-13	2.87462e-12	mediator complex subunit 26	Downregulated
TTLL11	158135	28.1481	0	1.38354	0.001	-10.4341	7.0666e-09	3.8523e-08	tubulin tyrosine ligase-like family member 11	Downregulated
NGLY1	55768	33.0229	0	1.382	0.001	-10.4325	2.46604e-10	1.61494e-09	N-glycanase 1	Downregulated
EXOSC4	54512	12.6767	0	1.36988	0.001	-10.4198	0.0003253	0.000845062	exosome component 4	Downregulated
KCNJ4	3761	25.9618	0	1.35687	0.001	-10.4061	5.29098e-08	2.54221e-07	potassium channel, inwardly rectifying subfamily J, member 4	Downregulated
LINC00705	338588	13.8578	0	1.35622	0.001	-10.4054	0.00016628	0.000458442	long intergenic non-protein coding RNA 705	Downregulated
FAR1	84188	70.4771	0	1.34416	0.001	-10.3925	4.0611e-21	9.06559e-20	fatty acyl CoA reductase 1	Downregulated
UBXN11	91544	24.6324	0	1.33844	0.001	-10.3863	1.03509e-07	4.73179e-07	UBX domain protein 11	Downregulated
VPS37A	137492	60.7041	0	1.33696	0.001	-10.3847	3.33476e-18	5.65015e-17	vacuolar protein sorting 37 homolog A (S. cerevisiae)	Downregulated
ABHD4	63874	33.5581	0	1.33657	0.001	-10.3843	2.46604e-10	1.61667e-09	abhydrolase domain containing 4	Downregulated
CDC42EP1	11135	28.6216	0	1.33003	0.001	-10.3772	7.0666e-09	3.84887e-08	CDC42 effector protein (Rho GTPase binding) 1	Downregulated
LOC729020	729020	27.7471	0	1.32113	0.001	-10.3676	1.38246e-08	7.20564e-08	ribulose-5-phosphate-3-epimerase-like 1	Downregulated
FBXW9	84261	22.6304	0	1.31377	0.001	-10.3595	3.96152e-07	1.65566e-06	F-box and WD repeat domain containing 9	Downregulated
PORCN	64840	24.1543	0	1.30931	0.001	-10.3546	1.03509e-07	4.72473e-07	porcupine homolog (Drosophila)	Downregulated
ID3	3399	16.0223	0	1.30522	0.001	-10.3501	2.22082e-05	6.97491e-05	inhibitor of DNA binding 3, dominant negative helix-loop-helix protein	Downregulated
RAB3IL1	5866	27.8334	0	1.3002	0.001	-10.3445	1.38246e-08	7.22411e-08	RAB3A interacting protein (rabin3)-like 1	Downregulated
ATG16L1	55054	37.4486	0	1.29693	0.001	-10.3409	1.68357e-11	1.29123e-10	autophagy related 16-like 1 (S. cerevisiae)	Downregulated
HACL1	26061	26.7416	0	1.28726	0.001	-10.3301	2.70454e-08	1.35094e-07	2-hydroxyacyl-CoA lyase 1	Downregulated
GBA2	57704	46.314	0	1.28644	0.001	-10.3292	4.011e-14	4.23353e-13	glucosidase, beta (bile acid) 2	Downregulated
ETV4	2118	29.0186	0	1.27991	0.001	-10.3218	3.61218e-09	2.04478e-08	ets variant 4	Downregulated
ATP6V1E1	529	16.4659	0	1.27527	0.001	-10.3166	2.22082e-05	6.98029e-05	ATPase, H+ transporting, lysosomal 31kDa, V1 subunit E1	Downregulated
ZFP91-CNTF	386607	43.9424	0	1.25344	0.001	-10.2917	3.00316e-13	2.88138e-12	ZFP91-CNTF readthrough (NMD candidate)	Downregulated
MPV17L2	84769	16.7274	0	1.25308	0.001	-10.2913	2.22082e-05	6.95705e-05	MPV17 mitochondrial membrane protein-like 2	Downregulated
KCTD20	222658	61.2279	0	1.25151	0.001	-10.2895	1.7046e-18	2.97466e-17	potassium channel tetramerization domain containing 20	Downregulated
RASSF4	83937	30.9399	0	1.2491	0.001	-10.2867	1.8464e-09	1.08906e-08	Ras association (RalGDS/AF-6) domain family member 4	Downregulated
C17orf53	78995	33.9739	0	1.24692	0.001	-10.2842	2.46604e-10	1.6158e-09	chromosome 17 open reading frame 53	Downregulated
AKAP11	11215	122.69	0	1.24568	0.001	-10.2827	2.84222e-36	2.27248e-34	A kinase (PRKA) anchor protein 11	Downregulated
LAP3	51056	25.6279	0	1.2378	0.001	-10.2736	5.29098e-08	2.54021e-07	leucine aminopeptidase 3	Downregulated
GCAT	23464	18.2818	0	1.2369	0.001	-10.2725	5.80272e-06	1.99507e-05	glycine C-acetyltransferase	Downregulated
RAB31	11031	48.9303	0	1.23315	0.001	-10.2681	1.04802e-14	1.17619e-13	RAB31, member RAS oncogene family	Downregulated
PPP1R18	170954	36.1428	0	1.23178	0.001	-10.2665	3.29362e-11	2.44039e-10	protein phosphatase 1, regulatory subunit 18	Downregulated
ACADM	34	30.4597	0	1.21702	0.001	-10.2491	1.8464e-09	1.09011e-08	acyl-CoA dehydrogenase, C-4 to C-12 straight chain	Downregulated
DCK	1633	31.2146	0	1.20738	0.001	-10.2377	9.4381e-10	5.78149e-09	deoxycytidine kinase	Downregulated
SSUH2	51066	21.4264	0	1.20696	0.001	-10.2372	7.75006e-07	3.07514e-06	ssu-2 homolog (C. elegans)	Downregulated
ALDH1A2	8854	39.1093	0	1.20151	0.001	-10.2306	4.39894e-12	3.67068e-11	aldehyde dehydrogenase 1 family, member A2	Downregulated
SNX10	29887	27.7124	0	1.19916	0.001	-10.2278	1.38246e-08	7.23028e-08	sorting nexin 10	Downregulated
XPO4	64328	117.772	0	1.19865	0.001	-10.2272	8.14456e-35	6.07515e-33	exportin 4	Downregulated
KAT8	84148	18.2101	0	1.19821	0.001	-10.2267	5.80272e-06	2.0007e-05	K(lysine) acetyltransferase 8	Downregulated
NR1H2	7376	21.1003	0	1.18926	0.001	-10.2158	7.75006e-07	3.08615e-06	nuclear receptor subfamily 1, group H, member 2	Downregulated
ATF5	22809	24.2317	0	1.17715	0.001	-10.2011	1.03509e-07	4.71242e-07	activating transcription factor 5	Downregulated
CKAP2L	150468	47.0948	0	1.17249	0.001	-10.1954	2.05028e-14	2.25347e-13	cytoskeleton associated protein 2-like	Downregulated
ULK1	8408	60.7994	0	1.17136	0.001	-10.194	3.33476e-18	5.64234e-17	unc-51 like autophagy activating kinase 1	Downregulated
SNCA	6622	34.7015	0	1.1618	0.001	-10.1821	1.26054e-10	8.60024e-10	synuclein, alpha (non A4 component of amyloid precursor)	Downregulated
CHST11	50515	65.6458	0	1.1514	0.001	-10.1692	1.16374e-19	2.21056e-18	carbohydrate (chondroitin 4) sulfotransferase 11	Downregulated
IFT57	55081	36.2828	0	1.13858	0.001	-10.153	3.29362e-11	2.43891e-10	intraflagellar transport 57	Downregulated
FH	2271	20.9521	0	1.13329	0.001	-10.1463	1.51617e-06	5.73154e-06	fumarate hydratase	Downregulated
IRF5	3663	29.0913	0	1.13134	0.001	-10.1438	3.61218e-09	2.04195e-08	interferon regulatory factor 5	Downregulated
MYO7A	4647	45.6409	0	1.13042	0.001	-10.1426	7.84684e-14	8.05965e-13	myosin VIIA	Downregulated
TBC1D23	55773	42.8121	0	1.12636	0.001	-10.1375	5.87518e-13	5.46133e-12	TBC1 domain family, member 23	Downregulated
IRF2BP2	359948	51.5011	0	1.12345	0.001	-10.1337	1.39973e-15	1.74367e-14	interferon regulatory factor 2 binding protein 2	Downregulated
NADKD1	133686	40.9699	0	1.12067	0.001	-10.1301	2.24856e-12	1.93572e-11	NAD kinase 2, mitochondrial	Downregulated
SLC25A19	60386	17.3373	0	1.1124	0.001	-10.1195	1.1352e-05	3.75627e-05	solute carrier family 25 (mitochondrial thiamine pyrophosphate carrier), member 19	Downregulated
ARHGAP33	115703	44.2888	0	1.1115	0.001	-10.1183	1.5351e-13	1.51933e-12	Rho GTPase activating protein 33	Downregulated
ACAA2	10449	21.0998	0	1.09705	0.001	-10.0994	7.75006e-07	3.08113e-06	acetyl-CoA acyltransferase 2	Downregulated
PRMT2	3275	29.6871	0	1.09121	0.001	-10.0917	3.61218e-09	2.04668e-08	protein arginine methyltransferase 2	Downregulated
CENPE	1062	89.1076	0	1.08664	0.001	-10.0857	1.17827e-26	4.64961e-25	centromere protein E, 312kDa	Downregulated
GPR64	10149	50.9804	0	1.0855	0.001	-10.0841	2.73832e-15	3.30028e-14	adhesion G protein-coupled receptor G2	Downregulated
ARHGAP40	343578	30.232	0	1.07818	0.001	-10.0744	1.8464e-09	1.08644e-08	Rho GTPase activating protein 40	Downregulated
WDR11	55717	50.5522	0	1.07547	0.001	-10.0708	2.73832e-15	3.31007e-14	WD repeat domain 11	Downregulated
PIGG	54872	34.2809	0	1.07509	0.001	-10.0702	1.26054e-10	8.60504e-10	phosphatidylinositol glycan anchor biosynthesis, class G	Downregulated
PRAF2	11230	13.8675	0	1.07403	0.001	-10.0688	0.00016628	0.000457	PRA1 domain family, member 2	Downregulated
MTMR11	10903	25.0673	0	1.07271	0.001	-10.067	5.29098e-08	2.52929e-07	myotubularin related protein 11	Downregulated
KDM6B	23135	71.0407	0	1.06882	0.001	-10.0618	2.07588e-21	4.74659e-20	lysine (K)-specific demethylase 6B	Downregulated
SERPINB8	5271	14.7851	0	1.06859	0.001	-10.0615	8.49962e-05	0.000245748	serpin peptidase inhibitor, clade B (ovalbumin), member 8	Downregulated
PATL1	219988	43.7698	0	1.06752	0.001	-10.06	3.00316e-13	2.86789e-12	protein associated with topoisomerase II homolog 1 (yeast)	Downregulated
FSD1	79187	19.5601	0	1.06487	0.001	-10.0565	2.96612e-06	1.07034e-05	fibronectin type III and SPRY domain containing 1	Downregulated
ATXN7L3	56970	38.044	0	1.0579	0.001	-10.047	8.60578e-12	6.87619e-11	ataxin 7-like 3	Downregulated
SLC17A9	63910	27.282	0	1.05771	0.001	-10.0467	1.38246e-08	7.20871e-08	solute carrier family 17 (vesicular nucleotide transporter), member 9	Downregulated
PI4KAP2	375133	23.4718	0	1.04719	0.001	-10.0323	2.02498e-07	8.79673e-07	phosphatidylinositol 4-kinase, catalytic, alpha pseudogene 2	Downregulated
RPE	6120	33.2361	0	1.04407	0.001	-10.028	2.46604e-10	1.61408e-09	ribulose-5-phosphate-3-epimerase	Downregulated
UBE2D1	7321	27.5836	0	1.04209	0.001	-10.0253	1.38246e-08	7.21178e-08	ubiquitin-conjugating enzyme E2D 1	Downregulated
SYTL2	54843	33.7647	0	1.04188	0.001	-10.025	2.46604e-10	1.6184e-09	synaptotagmin-like 2	Downregulated
ZSWIM4	65249	44.3896	0	1.03329	0.001	-10.013	1.5351e-13	1.52056e-12	zinc finger, SWIM-type containing 4	Downregulated
SNRNP40	9410	16.5475	0	1.02701	0.001	-10.0042	2.22082e-05	6.98747e-05	small nuclear ribonucleoprotein 40kDa (U5)	Downregulated
TTC25	83538	18.8023	0	1.02195	0.001	-9.99711	5.80272e-06	1.99732e-05	tetratricopeptide repeat domain 25	Downregulated
FAM78B	149297	14.8216	0	1.01854	0.001	-9.99229	8.49962e-05	0.000245342	family with sequence similarity 78, member B	Downregulated
KLHDC3	116138	19.1387	0	1.01555	0.001	-9.98805	2.96612e-06	1.06971e-05	kelch domain containing 3	Downregulated
SBDS	51119	15.8349	0	1.00321	0.001	-9.97041	4.34468e-05	0.000133071	Shwachman-Bodian-Diamond syndrome	Downregulated
ABTB1	80325	19.2097	0	0.99929	0.001	-9.96476	2.96612e-06	1.07256e-05	ankyrin repeat and BTB (POZ) domain containing 1	Downregulated
METTL17	64745	16.8384	0	0.989517	0.001	-9.95058	2.22082e-05	6.96597e-05	methyltransferase like 17	Downregulated
ZNF496	84838	23.9324	0	0.988405	0.001	-9.94896	2.02498e-07	8.80298e-07	zinc finger protein 496	Downregulated
ARAF	369	24.9005	0	0.984346	0.001	-9.94302	1.03509e-07	4.71067e-07	A-Raf proto-oncogene, serine/threonine kinase	Downregulated
FTSJ1	24140	15.9904	0	0.973813	0.001	-9.9275	4.34468e-05	0.000132738	FtsJ RNA methyltransferase homolog 1 (E. coli)	Downregulated
EBF3	253738	42.4554	0	0.971854	0.001	-9.9246	5.87518e-13	5.46548e-12	early B-cell factor 3	Downregulated
RAB35	11021	27.1808	0	0.970392	0.001	-9.92242	1.38246e-08	7.20257e-08	RAB35, member RAS oncogene family	Downregulated
MYNN	55892	49.3323	0	0.963159	0.001	-9.91163	5.35706e-15	6.24123e-14	myoneurin	Downregulated
C18orf8	29919	18.445	0	0.95605	0.001	-9.90094	5.80272e-06	1.99957e-05	chromosome 18 open reading frame 8	Downregulated
REL	5966	73.1994	0	0.941131	0.001	-9.87825	5.42398e-22	1.3165e-20	v-rel avian reticuloendotheliosis viral oncogene homolog	Downregulated
PPP3CB	5532	32.6733	0	0.94107	0.001	-9.87816	4.82438e-10	3.02494e-09	protein phosphatase 3, catalytic subunit, beta isozyme	Downregulated
GNL3	26354	18.9902	0	0.940691	0.001	-9.87758	5.80272e-06	1.99451e-05	guanine nucleotide binding protein-like 3 (nucleolar)	Downregulated
B3GNT9	84752	25.0543	0	0.931839	0.001	-9.86394	5.29098e-08	2.53226e-07	UDP-GlcNAc:betaGal beta-1,3-N-acetylglucosaminyltransferase 9	Downregulated
ABCC2	1244	50.1103	0	0.928612	0.001	-9.85893	2.73832e-15	3.31334e-14	ATP-binding cassette, sub-family C (CFTR/MRP), member 2	Downregulated
ELMO3	79767	23.3152	0	0.926774	0.001	-9.85607	2.02498e-07	8.82179e-07	engulfment and cell motility 3	Downregulated
TADA1	117143	20.7306	0	0.923255	0.001	-9.85059	1.51617e-06	5.7227e-06	transcriptional adaptor 1	Downregulated
XYLT2	64132	31.0291	0	0.92141	0.001	-9.8477	9.4381e-10	5.79018e-09	xylosyltransferase II	Downregulated
GTF2A1	2957	54.76	0	0.920858	0.001	-9.84683	1.86946e-16	2.5638e-15	general transcription factor IIA, 1, 19/37kDa	Downregulated
COPS7A	50813	17.1294	0	0.919113	0.001	-9.8441	1.1352e-05	3.73505e-05	COP9 signalosome subunit 7A	Downregulated
CPE	1363	22.316	0	0.919011	0.001	-9.84394	3.96152e-07	1.65793e-06	carboxypeptidase E	Downregulated
SLC25A33	84275	13.2446	0	0.913292	0.001	-9.83493	0.00016628	0.000459374	solute carrier family 25 (pyrimidine nucleotide carrier), member 33	Downregulated
RSBN1L	222194	28.588	0	0.897953	0.001	-9.8105	7.0666e-09	3.84716e-08	round spermatid basic protein 1-like	Downregulated
MMD	23531	24.0249	0	0.893223	0.001	-9.80288	1.03509e-07	4.71769e-07	monocyte to macrophage differentiation-associated	Downregulated
CHMP5	51510	18.1641	0	0.890125	0.001	-9.79786	5.80272e-06	1.99619e-05	charged multivesicular body protein 5	Downregulated
SPIRE1	56907	44.8871	0	0.888441	0.001	-9.79513	1.5351e-13	1.52798e-12	spire-type actin nucleation factor 1	Downregulated
FLYWCH1	84256	22.4025	0	0.888039	0.001	-9.79448	3.96152e-07	1.6585e-06	FLYWCH-type zinc finger 1	Downregulated
RNF4	6047	24.6201	0	0.886524	0.001	-9.79202	1.03509e-07	4.70892e-07	ring finger protein 4	Downregulated
CDKN1B	1027	22.1477	0	0.884909	0.001	-9.78939	3.96152e-07	1.65623e-06	cyclin-dependent kinase inhibitor 1B (p27, Kip1)	Downregulated
PMEL	6490	18.569	0	0.879303	0.001	-9.78022	5.80272e-06	1.99395e-05	premelanosome protein	Downregulated
ABCB10	23456	33.4032	0	0.874241	0.001	-9.77189	2.46604e-10	1.61754e-09	ATP-binding cassette, sub-family B (MDR/TAP), member 10	Downregulated
MRPL11	65003	12.4454	0	0.870716	0.001	-9.76606	0.0003253	0.000842557	mitochondrial ribosomal protein L11	Downregulated
A4GALT	53947	18.0099	0	0.867362	0.001	-9.76049	5.80272e-06	1.99115e-05	alpha 1,4-galactosyltransferase	Downregulated
USP17L15	100288520	14.2384	0	0.86138	0.001	-9.75051	8.49962e-05	0.000246038	ubiquitin specific peptidase 17-like family member 15	Downregulated
CETP	1071	13.0068	0	0.860901	0.001	-9.7497	0.00016628	0.000458959	cholesteryl ester transfer protein, plasma	Downregulated
CLP1	10978	14.1469	0	0.859986	0.001	-9.74817	8.49962e-05	0.00024569	cleavage and polyadenylation factor I subunit 1	Downregulated
PAIP1	10605	19.9697	0	0.856024	0.001	-9.74151	2.96612e-06	1.07129e-05	poly(A) binding protein interacting protein 1	Downregulated
KPNA1	3836	58.4067	0	0.855079	0.001	-9.73991	1.27629e-17	2.03292e-16	karyopherin alpha 1 (importin alpha 5)	Downregulated
FAM133CP	728640	21.1839	0	0.851475	0.001	-9.73382	7.75006e-07	3.08715e-06	family with sequence similarity 133, member A pseudogene	Downregulated
GPR137B	7107	17.1379	0	0.849771	0.001	-9.73093	1.1352e-05	3.75221e-05	G protein-coupled receptor 137B	Downregulated
EFNA5	1946	44.2012	0	0.836205	0.001	-9.70771	1.5351e-13	1.52179e-12	ephrin-A5	Downregulated
SMAP2	64744	20.5229	0	0.83559	0.001	-9.70665	1.51617e-06	5.73508e-06	small ArfGAP2	Downregulated
FAM196A	642938	36.3391	0	0.832791	0.001	-9.70181	3.29362e-11	2.43449e-10	family with sequence similarity 196, member A	Downregulated
SH3BGRL2	83699	38.441	0	0.830274	0.001	-9.69744	8.60578e-12	6.88969e-11	SH3 domain binding glutamate-rich protein like 2	Downregulated
GCDH	2639	15.9534	0	0.829467	0.001	-9.69604	4.34468e-05	0.000133004	glutaryl-CoA dehydrogenase	Downregulated
KATNA1	11104	13.7736	0	0.825324	0.001	-9.68882	0.00016628	0.000457411	katanin p60 (ATPase containing) subunit A 1	Downregulated
LHPP	64077	13.0753	0	0.825262	0.001	-9.68871	0.00016628	0.000458546	phospholysine phosphohistidine inorganic pyrophosphate phosphatase	Downregulated
ACAD8	27034	17.9823	0	0.822709	0.001	-9.68424	1.1352e-05	3.74412e-05	acyl-CoA dehydrogenase family, member 8	Downregulated
ZNF8	7554	17.9271	0	0.822429	0.001	-9.68375	1.1352e-05	3.73807e-05	zinc finger protein 8	Downregulated
HOMEZ	57594	30.4018	0	0.821327	0.001	-9.68181	1.8464e-09	1.08853e-08	homeobox and leucine zipper encoding	Downregulated
VRK2	7444	16.7099	0	0.817439	0.001	-9.67497	2.22082e-05	6.96419e-05	vaccinia related kinase 2	Downregulated
NSUN7	79730	29.9361	0	0.815313	0.001	-9.67121	3.61218e-09	2.04101e-08	NOP2/Sun domain family, member 7	Downregulated
GIPC1	10755	12.0256	0	0.81472	0.001	-9.67016	0.0003253	0.000840066	GIPC PDZ domain containing family, member 1	Downregulated
COQ2	27235	13.2519	0	0.812942	0.001	-9.66701	0.00016628	0.000457514	coenzyme Q2 4-hydroxybenzoate polyprenyltransferase	Downregulated
CYTH1	9267	26.7287	0	0.811923	0.001	-9.6652	2.70454e-08	1.34874e-07	cytohesin 1	Downregulated
GLB1L2	89944	25.4445	0	0.809833	0.001	-9.66148	5.29098e-08	2.53722e-07	galactosidase, beta 1-like 2	Downregulated
TCN2	6948	15.9572	0	0.807142	0.001	-9.65668	4.34468e-05	0.000132705	transcobalamin II	Downregulated
CCM2	83605	12.943	0	0.806783	0.001	-9.65604	0.0003253	0.000843807	cerebral cavernous malformation 2	Downregulated
TMEM161B	153396	20.9388	0	0.80496	0.001	-9.65277	1.51617e-06	5.73331e-06	transmembrane protein 161B	Downregulated
BTBD1	53339	25.6255	0	0.8049	0.001	-9.65267	5.29098e-08	2.53623e-07	BTB (POZ) domain containing 1	Downregulated
CSRNP2	81566	36.3691	0	0.797857	0.001	-9.63999	3.29362e-11	2.43596e-10	cysteine-serine-rich nuclear protein 2	Downregulated
COPS3	8533	14.1591	0	0.790949	0.001	-9.62744	8.49962e-05	0.000245226	COP9 signalosome subunit 3	Downregulated
ADH5	128	20.5363	0	0.784096	0.001	-9.61489	1.51617e-06	5.728e-06	alcohol dehydrogenase 5 (class III), chi polypeptide	Downregulated
PCGF3	10336	43.9466	0	0.782673	0.001	-9.61227	3.00316e-13	2.87687e-12	polycomb group ring finger 3	Downregulated
IGSF22	283284	33.6569	0	0.77967	0.001	-9.60672	2.46604e-10	1.61063e-09	immunoglobulin superfamily, member 22	Downregulated
TRMT6	51605	17.2425	0	0.779293	0.001	-9.60602	1.1352e-05	3.73706e-05	tRNA methyltransferase 6	Downregulated
TTC38	55020	20.1061	0	0.778304	0.001	-9.60419	1.51617e-06	5.72977e-06	tetratricopeptide repeat domain 38	Downregulated
FAM53C	51307	33.8464	0	0.77797	0.001	-9.60357	2.46604e-10	1.61321e-09	family with sequence similarity 53, member C	Downregulated
SH3BP5	9467	24.3382	0	0.756751	0.001	-9.56367	1.03509e-07	4.73003e-07	SH3-domain binding protein 5 (BTK-associated)	Downregulated
BNIP3	664	12.3648	0	0.75668	0.001	-9.56354	0.0003253	0.000844344	BCL2/adenovirus E1B 19kDa interacting protein 3	Downregulated
KIAA0408	9729	60.5899	0	0.751912	0.001	-9.55442	3.33476e-18	5.63455e-17	KIAA0408	Downregulated
SPRED1	161742	54.0719	0	0.751588	0.001	-9.5538	1.86946e-16	2.56957e-15	sprouty-related, EVH1 domain containing 1	Downregulated
ENOPH1	58478	15.9573	0	0.748441	0.001	-9.54774	4.34468e-05	0.000132672	enolase-phosphatase 1	Downregulated
GGN	199720	15.941	0	0.745594	0.001	-9.54225	4.34468e-05	0.000132838	gametogenetin	Downregulated
SNX21	90203	23.2686	0	0.743404	0.001	-9.538	2.02498e-07	8.79985e-07	sorting nexin family member 21	Downregulated
LYPD6	130574	30.1347	0	0.742348	0.001	-9.53595	1.8464e-09	1.08748e-08	LY6/PLAUR domain containing 6	Downregulated
TBC1D20	128637	18.937	0	0.741904	0.001	-9.53509	5.80272e-06	2.00182e-05	TBC1 domain family, member 20	Downregulated
ACSL1	2180	27.668	0	0.741104	0.001	-9.53353	1.38246e-08	7.22102e-08	acyl-CoA synthetase long-chain family member 1	Downregulated
ZNF407	55628	40.9489	0	0.734618	0.001	-9.52085	2.24856e-12	1.93982e-11	zinc finger protein 407	Downregulated
SLC4A7	9497	53.7752	0	0.73328	0.001	-9.51822	3.65728e-16	4.85771e-15	solute carrier family 4, sodium bicarbonate cotransporter, member 7	Downregulated
ZBTB37	84614	16.5663	0	0.730038	0.001	-9.51183	2.22082e-05	6.95883e-05	zinc finger and BTB domain containing 37	Downregulated
CISD3	284106	18.9974	0	0.729769	0.001	-9.5113	5.80272e-06	1.99676e-05	CDGSH iron sulfur domain 3	Downregulated
EGR1	1958	22.5992	0	0.728962	0.001	-9.5097	3.96152e-07	1.6534e-06	early growth response 1	Downregulated
EML5	161436	51.8142	0	0.728662	0.001	-9.50911	1.39973e-15	1.7508e-14	echinoderm microtubule associated protein like 5	Downregulated
TAF1A	9015	12.8814	0	0.728473	0.001	-9.50873	0.0003253	0.000844882	TATA box binding protein (TBP)-associated factor, RNA polymerase I, A, 48kDa	Downregulated
C1orf204	284677	17.8778	0	0.724083	0.001	-9.50001	1.1352e-05	3.7421e-05	chromosome 1 open reading frame 204	Downregulated
OPN3	23596	18.7246	0	0.720392	0.001	-9.49264	5.80272e-06	2.00013e-05	opsin 3	Downregulated
OPA1	4976	44.4899	0	0.719611	0.001	-9.49107	1.5351e-13	1.52674e-12	optic atrophy 1 (autosomal dominant)	Downregulated
FKTN	2218	17.7447	0	0.717826	0.001	-9.48749	1.1352e-05	3.75424e-05	fukutin	Downregulated
TAP1	6890	15.6092	0	0.708342	0.001	-9.4683	4.34468e-05	0.000132971	transporter 1, ATP-binding cassette, sub-family B (MDR/TAP)	Downregulated
BCORL1	63035	49.7814	0	0.704408	0.001	-9.46027	5.35706e-15	6.24718e-14	BCL6 corepressor-like 1	Downregulated
SYN3	8224	19.0786	0	0.701036	0.001	-9.45334	2.96612e-06	1.07192e-05	synapsin III	Downregulated
DYM	54808	18.1734	0	0.700256	0.001	-9.45174	5.80272e-06	1.99901e-05	dymeclin	Downregulated
COG5	10466	34.5814	0	0.68989	0.001	-9.43022	1.26054e-10	8.61466e-10	component of oligomeric golgi complex 5	Downregulated
RAPGEF5	9771	45.2716	0	0.688842	0.001	-9.42803	7.84684e-14	8.06642e-13	Rap guanine nucleotide exchange factor (GEF) 5	Downregulated
TBXAS1	6916	12.9966	0	0.687455	0.001	-9.42512	0.0003253	0.000839535	thromboxane A synthase 1 (platelet)	Downregulated
EXD2	55218	31.0814	0	0.687101	0.001	-9.42438	9.4381e-10	5.7757e-09	exonuclease 3'-5' domain containing 2	Downregulated
FXYD6	53826	12.1933	0	0.686472	0.001	-9.42306	0.0003253	0.000842022	FXYD domain containing ion transport regulator 6	Downregulated
STC1	6781	26.4471	0	0.685761	0.001	-9.42156	2.70454e-08	1.35315e-07	stanniocalcin 1	Downregulated
ZNF398	57541	37.2758	0	0.684252	0.001	-9.41838	1.68357e-11	1.29042e-10	zinc finger protein 398	Downregulated
CCDC163P	126661	13.6174	0	0.676879	0.001	-9.40275	0.00016628	0.00045772	coiled-coil domain containing 163, pseudogene	Downregulated
SMARCA1	6594	26.722	0	0.676841	0.001	-9.40267	2.70454e-08	1.3515e-07	SWI/SNF related, matrix associated, actin dependent regulator of chromatin, subfamily a, member 1	Downregulated
DHDDS	79947	22.3452	0	0.675911	0.001	-9.40069	3.96152e-07	1.65397e-06	dehydrodolichyl diphosphate synthase	Downregulated
KIAA0907	22889	20.094	0	0.675664	0.001	-9.40016	1.51617e-06	5.72623e-06	KIAA0907	Downregulated
SH3D21	79729	15.4635	0	0.671734	0.001	-9.39175	4.34468e-05	0.000132904	SH3 domain containing 21	Downregulated
MGC45800	90768	21.9638	0	0.662382	0.001	-9.37152	7.75006e-07	3.08013e-06	uncharacterized LOC90768	Downregulated
AP4B1	10717	17.4065	0	0.661833	0.001	-9.37032	1.1352e-05	3.75525e-05	adaptor-related protein complex 4, beta 1 subunit	Downregulated
TRIM2	23321	44.5076	0	0.661197	0.001	-9.36894	1.5351e-13	1.52426e-12	tripartite motif containing 2	Downregulated
SPTLC3	55304	25.0347	0	0.656241	0.001	-9.35808	5.29098e-08	2.53028e-07	serine palmitoyltransferase, long chain base subunit 3	Downregulated
THEM6	51337	14.5783	0	0.652725	0.001	-9.35033	8.49962e-05	0.000245284	thioesterase superfamily member 6	Downregulated
AMH	268	13.2618	0	0.651479	0.001	-9.34757	0.00016628	0.000457206	anti-Mullerian hormone	Downregulated
SUPT7L	9913	26.4177	0	0.645881	0.001	-9.33512	2.70454e-08	1.34929e-07	suppressor of Ty 7 (S. cerevisiae)-like	Downregulated
ABCB5	340273	21.5116	0	0.645005	0.001	-9.33317	7.75006e-07	3.07713e-06	ATP-binding cassette, sub-family B (MDR/TAP), member 5	Downregulated
THRB	7068	47.2678	0	0.642716	0.001	-9.32804	2.05028e-14	2.25144e-13	thyroid hormone receptor, beta	Downregulated
ATRIP	84126	15.4593	0	0.6413	0.001	-9.32486	4.34468e-05	0.000132606	ATR interacting protein	Downregulated
CYP27B1	1594	15.7737	0	0.638352	0.001	-9.31821	4.34468e-05	0.00013254	cytochrome P450, family 27, subfamily B, polypeptide 1	Downregulated
RAP1A	5906	31.8527	0	0.633318	0.001	-9.30679	9.4381e-10	5.78728e-09	RAP1A, member of RAS oncogene family	Downregulated
NHSL1	57224	43.9945	0	0.632849	0.001	-9.30572	3.00316e-13	2.87913e-12	NHS-like 1	Downregulated
NEK8	284086	17.8524	0	0.632198	0.001	-9.30423	1.1352e-05	3.74816e-05	NIMA-related kinase 8	Downregulated
SLC25A12	8604	24.1197	0	0.627841	0.001	-9.29426	1.03509e-07	4.71593e-07	solute carrier family 25 (aspartate/glutamate carrier), member 12	Downregulated
THAP10	56906	13.0789	0	0.625988	0.001	-9.28999	0.00016628	0.000457617	THAP domain containing 10	Downregulated
ENTPD6	955	16.6338	0	0.619575	0.001	-9.27514	2.22082e-05	6.97312e-05	ectonucleoside triphosphate diphosphohydrolase 6 (putative)	Downregulated
PRKCE	5581	33.8927	0	0.617724	0.001	-9.27082	2.46604e-10	1.61927e-09	protein kinase C, epsilon	Downregulated
CTU1	90353	12.8143	0	0.616843	0.001	-9.26876	0.0003253	0.000840244	cytosolic thiouridylase subunit 1	Downregulated
DUSP16	80824	38.5408	0	0.615959	0.001	-9.26669	8.60578e-12	6.86722e-11	dual specificity phosphatase 16	Downregulated
C3orf18	51161	14.6212	0	0.612655	0.001	-9.25893	8.49962e-05	0.000245574	chromosome 3 open reading frame 18	Downregulated
METTL3	56339	12.284	0	0.611504	0.001	-9.25622	0.0003253	0.000839712	methyltransferase like 3	Downregulated
ZBTB21	49854	41.6446	0	0.610836	0.001	-9.25464	1.14938e-12	1.02705e-11	zinc finger and BTB domain containing 21	Downregulated
CHD1	1105	39.058	0	0.61017	0.001	-9.25307	4.39894e-12	3.67319e-11	chromodomain helicase DNA binding protein 1	Downregulated
POLL	27343	14.04	0	0.608059	0.001	-9.24807	8.49962e-05	0.000245053	polymerase (DNA directed), lambda	Downregulated
STK36	27148	29.3689	0	0.607216	0.001	-9.24607	3.61218e-09	2.04006e-08	serine/threonine kinase 36	Downregulated
FUT9	10690	76.2554	0	0.599453	0.001	-9.2275	7.24422e-23	1.94766e-21	fucosyltransferase 9 (alpha (1,3) fucosyltransferase)	Downregulated
MGAT3	4248	29.6353	0	0.598357	0.001	-9.22486	3.61218e-09	2.04384e-08	mannosyl (beta-1,4-)-glycoprotein beta-1,4-N-acetylglucosaminyltransferase	Downregulated
LOC729732	729732	23.4897	0	0.59602	0.001	-9.21922	2.02498e-07	8.81237e-07	uncharacterized LOC729732	Downregulated
C20orf194	25943	40.6149	0	0.592022	0.001	-9.20951	2.24856e-12	1.93709e-11	chromosome 20 open reading frame 194	Downregulated
CNOT2	4848	19.8892	0	0.588871	0.001	-9.20181	2.96612e-06	1.07066e-05	CCR4-NOT transcription complex, subunit 2	Downregulated
TCF7L2	6934	22.5906	0	0.588342	0.001	-9.20051	3.96152e-07	1.65736e-06	transcription factor 7-like 2 (T-cell specific, HMG-box)	Downregulated
KIF3B	9371	35.526	0	0.584203	0.001	-9.19033	6.44342e-11	4.58536e-10	kinesin family member 3B	Downregulated
MXI1	4601	17.3182	0	0.575026	0.001	-9.16748	1.1352e-05	3.7512e-05	MAX interactor 1, dimerization protein	Downregulated
PTPMT1	114971	14.9706	0	0.573258	0.001	-9.16304	8.49962e-05	0.000246097	protein tyrosine phosphatase, mitochondrial 1	Downregulated
HS1BP3	64342	13.5876	0	0.572927	0.001	-9.16221	0.00016628	0.000457103	HCLS1 binding protein 3	Downregulated
OSBPL2	9885	21.789	0	0.572204	0.001	-9.16039	7.75006e-07	3.08214e-06	oxysterol binding protein-like 2	Downregulated
GLUD2	2747	13.2549	0	0.572084	0.001	-9.16008	0.00016628	0.000456795	glutamate dehydrogenase 2	Downregulated
CNR1	1268	32.3391	0	0.569297	0.001	-9.15304	4.82438e-10	3.02649e-09	cannabinoid receptor 1 (brain)	Downregulated
VASN	114990	16.0762	0	0.568097	0.001	-9.14999	2.22082e-05	6.99287e-05	vasorin	Downregulated
PLRG1	5356	18.7457	0	0.566349	0.001	-9.14555	5.80272e-06	1.99788e-05	pleiotropic regulator 1	Downregulated
PRR12	57479	38.9976	0	0.56509	0.001	-9.14234	8.60578e-12	6.88519e-11	proline rich 12	Downregulated
FOXD2	2306	26.1034	0	0.563799	0.001	-9.13904	2.70454e-08	1.34819e-07	forkhead box D2	Downregulated
GTSE1	51512	17.2575	0	0.558089	0.001	-9.12435	1.1352e-05	3.74513e-05	G-2 and S-phase expressed 1	Downregulated
PPP2R5E	5529	22.6125	0	0.554465	0.001	-9.11495	3.96152e-07	1.65284e-06	protein phosphatase 2, regulatory subunit B', epsilon isoform	Downregulated
FAM160A1	729830	25.0233	0	0.552206	0.001	-9.10906	5.29098e-08	2.53822e-07	family with sequence similarity 160, member A1	Downregulated
ZDHHC17	23390	26.0533	0	0.551354	0.001	-9.10684	2.70454e-08	1.35205e-07	zinc finger, DHHC-type containing 17	Downregulated
MTMR8	55613	14.3163	0	0.541878	0.001	-9.08182	8.49962e-05	0.00024511	myotubularin related protein 8	Downregulated
SLC22A5	6584	17.4843	0	0.53662	0.001	-9.06776	1.1352e-05	3.74109e-05	solute carrier family 22 (organic cation/carnitine transporter), member 5	Downregulated
MARCH4	57574	23.6552	0	0.534923	0.001	-9.06319	2.02498e-07	8.80924e-07	membrane-associated ring finger (C3HC4) 4, E3 ubiquitin protein ligase	Downregulated
PSMF1	9491	19.3884	0	0.531443	0.001	-9.05377	2.96612e-06	1.07319e-05	proteasome (prosome, macropain) inhibitor subunit 1 (PI31)	Downregulated
HSF2	3298	14.1502	0	0.531197	0.001	-9.0531	8.49962e-05	0.00024598	heat shock transcription factor 2	Downregulated
SLC4A9	83697	16.5812	0	0.530591	0.001	-9.05146	2.22082e-05	6.98208e-05	solute carrier family 4, sodium bicarbonate cotransporter, member 9	Downregulated
DCUN1D2	55208	15.8914	0	0.527825	0.001	-9.04392	4.34468e-05	0.000132639	DCN1, defective in cullin neddylation 1, domain containing 2	Downregulated
ZC3H3	23144	17.0247	0	0.521399	0.001	-9.02624	1.1352e-05	3.74311e-05	zinc finger CCCH-type containing 3	Downregulated
PARD3B	117583	40.4321	0	0.517919	0.001	-9.01658	2.24856e-12	1.93845e-11	par-3 family cell polarity regulator beta	Downregulated
LOC100216545	100216545	18.2629	0	0.510663	0.001	-8.99623	5.80272e-06	1.99227e-05	KMT2E antisense RNA 1 (head to head)	Downregulated
CPEB1	64506	16.362	0	0.510584	0.001	-8.996	2.22082e-05	6.98927e-05	cytoplasmic polyadenylation element binding protein 1	Downregulated
DNAJC21	134218	30.4626	0	0.505233	0.001	-8.98081	1.8464e-09	1.08801e-08	DnaJ (Hsp40) homolog, subfamily C, member 21	Downregulated
ATAD1	84896	15.1178	0	0.504127	0.001	-8.97764	4.34468e-05	0.000132573	ATPase family, AAA domain containing 1	Downregulated
ZNF853	54753	17.8399	0	0.50402	0.001	-8.97734	1.1352e-05	3.73606e-05	zinc finger protein 853	Downregulated
FMN2	56776	31.8127	0	0.498298	0.001	-8.96086	9.4381e-10	5.77281e-09	formin 2	Downregulated
SIAH2	6478	12.922	0	0.497148	0.001	-8.95753	0.0003253	0.0008422	siah E3 ubiquitin protein ligase 2	Downregulated
LRRC8A	56262	20.9681	0	0.497062	0.001	-8.95728	1.51617e-06	5.72093e-06	leucine rich repeat containing 8 family, member A	Downregulated
PAX2	5076	17.7226	0	0.487682	0.001	-8.9298	1.1352e-05	3.73304e-05	paired box 2	Downregulated
GPD1L	23171	19.6109	0	0.487038	0.001	-8.92789	2.96612e-06	1.07382e-05	glycerol-3-phosphate dehydrogenase 1-like	Downregulated
DSE	29940	19.482	0	0.48684	0.001	-8.9273	2.96612e-06	1.07002e-05	dermatan sulfate epimerase	Downregulated
SLC25A36	55186	22.5266	0	0.486629	0.001	-8.92668	3.96152e-07	1.65906e-06	solute carrier family 25 (pyrimidine nucleotide carrier), member 36	Downregulated
SLC25A5-AS1	100303728	14.9348	0	0.485004	0.001	-8.92185	8.49962e-05	0.0002454	SLC25A5 antisense RNA 1	Downregulated
POGZ	23126	28.8475	0	0.472218	0.001	-8.88331	7.0666e-09	3.85059e-08	pogo transposable element with ZNF domain	Downregulated
TMEM181	57583	25.2119	0	0.471466	0.001	-8.88101	5.29098e-08	2.53127e-07	transmembrane protein 181	Downregulated
ARRB1	408	35.1352	0	0.471438	0.001	-8.88092	6.44342e-11	4.5907e-10	arrestin, beta 1	Downregulated
ABHD13	84945	24.7621	0	0.470133	0.001	-8.87693	1.03509e-07	4.73356e-07	abhydrolase domain containing 13	Downregulated
CDK5RAP2	55755	25.694	0	0.467026	0.001	-8.86736	5.29098e-08	2.53424e-07	CDK5 regulatory subunit associated protein 2	Downregulated
ZNF275	10838	28.9679	0	0.462378	0.001	-8.85293	7.0666e-09	3.85574e-08	zinc finger protein 275	Downregulated
CRTC1	23373	31.8152	0	0.460948	0.001	-8.84846	9.4381e-10	5.77859e-09	CREB regulated transcription coactivator 1	Downregulated
MITF	4286	19.4003	0	0.457202	0.001	-8.83669	2.96612e-06	1.07287e-05	microphthalmia-associated transcription factor	Downregulated
KDM6A	7403	24.9111	0	0.454685	0.001	-8.82872	1.03509e-07	4.72121e-07	lysine (K)-specific demethylase 6A	Downregulated
STYX	6815	21.8109	0	0.45132	0.001	-8.81801	7.75006e-07	3.07813e-06	serine/threonine/tyrosine interacting protein	Downregulated
CYB561	1534	14.0873	0	0.449075	0.001	-8.81081	8.49962e-05	0.000245458	cytochrome b561	Downregulated
ITGA7	3679	16.6964	0	0.447527	0.001	-8.80583	2.22082e-05	6.96776e-05	integrin, alpha 7	Downregulated
POLR3E	55718	16.0078	0	0.447111	0.001	-8.80449	2.22082e-05	6.97133e-05	polymerase (RNA) III (DNA directed) polypeptide E (80kD)	Downregulated
RER1	11079	13.7388	0	0.445732	0.001	-8.80003	0.00016628	0.000459167	retention in endoplasmic reticulum sorting receptor 1	Downregulated
NCOA1	8648	30.4325	0	0.44529	0.001	-8.7986	1.8464e-09	1.09063e-08	nuclear receptor coactivator 1	Downregulated
LYN	4067	18.0425	0	0.44512	0.001	-8.79805	5.80272e-06	1.99171e-05	LYN proto-oncogene, Src family tyrosine kinase	Downregulated
MSH5	4439	12.9299	0	0.444273	0.001	-8.7953	0.0003253	0.000843271	mutS homolog 5	Downregulated
COL19A1	1310	38.4046	0	0.443651	0.001	-8.79328	8.60578e-12	6.8717e-11	collagen, type XIX, alpha 1	Downregulated
PALB2	79728	17.641	0	0.438007	0.001	-8.77481	1.1352e-05	3.73405e-05	partner and localizer of BRCA2	Downregulated
BMF	90427	18.9939	0	0.435784	0.001	-8.76747	5.80272e-06	1.99844e-05	Bcl2 modifying factor	Downregulated
VEZF1	7716	20.0603	0	0.435426	0.001	-8.76628	1.51617e-06	5.7174e-06	vascular endothelial zinc finger 1	Downregulated
TTC9	23508	22.4939	0	0.435199	0.001	-8.76553	3.96152e-07	1.6551e-06	tetratricopeptide repeat domain 9	Downregulated
KIF21A	55605	27.8194	0	0.432116	0.001	-8.75527	1.38246e-08	7.1995e-08	kinesin family member 21A	Downregulated
RHPN1	114822	16.0045	0	0.426194	0.001	-8.73537	2.22082e-05	6.99107e-05	rhophilin, Rho GTPase binding protein 1	Downregulated
HMGCR	3156	18.6202	0	0.424501	0.001	-8.72962	5.80272e-06	2.00126e-05	3-hydroxy-3-methylglutaryl-CoA reductase	Downregulated
FAM160A2	84067	14.5149	0	0.423519	0.001	-8.72628	8.49962e-05	0.000245864	family with sequence similarity 160, member A2	Downregulated
C10orf71	118461	21.8882	0	0.417935	0.001	-8.70713	7.75006e-07	3.07614e-06	chromosome 10 open reading frame 71	Downregulated
GDAP1	54332	15.467	0	0.4164	0.001	-8.70183	4.34468e-05	0.000132805	ganglioside induced differentiation associated protein 1	Downregulated
SFI1	9814	16.8765	0	0.414928	0.001	-8.69672	2.22082e-05	6.9624e-05	Sfi1 homolog, spindle assembly associated (yeast)	Downregulated
MTMR9	66036	30.4508	0	0.41377	0.001	-8.69269	1.8464e-09	1.09116e-08	myotubularin related protein 9	Downregulated
GYG2	8908	12.0353	0	0.413254	0.001	-8.69088	0.0003253	0.00084131	glycogenin 2	Downregulated
SLC25A23	79085	14.199	0	0.413105	0.001	-8.69036	8.49962e-05	0.000246155	solute carrier family 25 (mitochondrial carrier; phosphate carrier), member 23	Downregulated
ATR	545	33.295	0	0.406468	0.001	-8.667	2.46604e-10	1.61149e-09	ATR serine/threonine kinase	Downregulated
TRIM33	51592	33.1127	0	0.402775	0.001	-8.65383	2.46604e-10	1.60977e-09	tripartite motif containing 33	Downregulated
IGDCC3	9543	17.8539	0	0.401479	0.001	-8.64918	1.1352e-05	3.75729e-05	immunoglobulin superfamily, DCC subclass, member 3	Downregulated
STX3	6809	25.3066	0	0.399876	0.001	-8.64341	5.29098e-08	2.53524e-07	syntaxin 3	Downregulated
SHPRH	257218	27.2488	0	0.392022	0.001	-8.61479	1.38246e-08	7.21794e-08	SNF2 histone linker PHD RING helicase, E3 ubiquitin protein ligase	Downregulated
HYMAI	57061	19.2577	0	0.388424	0.001	-8.60149	2.96612e-06	1.07097e-05	hydatidiform mole associated and imprinted (non-protein coding)	Downregulated
TNFRSF19	55504	12.1642	0	0.387928	0.001	-8.59965	0.0003253	0.000844703	tumor necrosis factor receptor superfamily, member 19	Downregulated
TECTA	7007	24.8713	0	0.387881	0.001	-8.59947	1.03509e-07	4.71945e-07	tectorin alpha	Downregulated
TTBK2	146057	21.6474	0	0.387659	0.001	-8.59864	7.75006e-07	3.08514e-06	tau tubulin kinase 2	Downregulated
GPRASP2	114928	14.2051	0	0.3849	0.001	-8.58834	8.49962e-05	0.000245632	G protein-coupled receptor associated sorting protein 2	Downregulated
CNTNAP1	8506	20.8578	0	0.384752	0.001	-8.58779	1.51617e-06	5.72446e-06	contactin associated protein 1	Downregulated
ITPRIP	85450	24.812	0	0.384276	0.001	-8.586	1.03509e-07	4.72297e-07	inositol 1,4,5-trisphosphate receptor interacting protein	Downregulated
SLC39A9	55334	18.4271	0	0.383352	0.001	-8.58253	5.80272e-06	1.99339e-05	solute carrier family 39, member 9	Downregulated
ZNF542	147947	12.9323	0	0.383234	0.001	-8.58208	0.0003253	0.000839889	zinc finger protein 542, pseudogene	Downregulated
NCDN	23154	12.7855	0	0.382715	0.001	-8.58013	0.0003253	0.000844165	neurochondrin	Downregulated
ADCY1	107	23.2791	0	0.381837	0.001	-8.57681	2.02498e-07	8.81551e-07	adenylate cyclase 1 (brain)	Downregulated
ASXL1	171023	26.6833	0	0.381377	0.001	-8.57507	2.70454e-08	1.3526e-07	additional sex combs like transcriptional regulator 1	Downregulated
KCNQ3	3786	39.6649	0	0.372949	0.001	-8.54283	4.39894e-12	3.6757e-11	potassium channel, voltage gated KQT-like subfamily Q, member 3	Downregulated
BCAT1	586	34.6314	0	0.371112	0.001	-8.53571	1.26054e-10	8.60985e-10	branched chain amino-acid transaminase 1, cytosolic	Downregulated
MYO1D	4642	12.9478	0	0.370065	0.001	-8.53163	0.0003253	0.000843986	myosin ID	Downregulated
RELT	84957	12.4827	0	0.364965	0.001	-8.51161	0.0003253	0.00084345	RELT tumor necrosis factor receptor	Downregulated
RBAK	57786	22.4728	0	0.356668	0.001	-8.47844	3.96152e-07	1.6568e-06	RB-associated KRAB zinc finger	Downregulated
RNMT	8731	21.8727	0	0.355729	0.001	-8.47463	7.75006e-07	3.07314e-06	RNA (guanine-7-) methyltransferase	Downregulated
HECTD3	79654	12.648	0	0.352388	0.001	-8.46102	0.0003253	0.000844524	HECT domain containing E3 ubiquitin protein ligase 3	Downregulated
KCTD15	79047	13.5195	0	0.347332	0.001	-8.44017	0.00016628	0.000458132	potassium channel tetramerization domain containing 15	Downregulated
ELOVL2	54898	14.0007	0	0.346766	0.001	-8.43782	8.49962e-05	0.000245516	ELOVL fatty acid elongase 2	Downregulated
COL16A1	1307	18.7323	0	0.33853	0.001	-8.40314	5.80272e-06	1.99283e-05	collagen, type XVI, alpha 1	Downregulated
DCAF12	25853	12.2261	0	0.335066	0.001	-8.3883	0.0003253	0.000841666	DDB1 and CUL4 associated factor 12	Downregulated
ARNT2	9915	21.5287	0	0.330222	0.001	-8.36729	7.75006e-07	3.08314e-06	aryl-hydrocarbon receptor nuclear translocator 2	Downregulated
PEAK1	79834	38.7224	0	0.329672	0.001	-8.36489	8.60578e-12	6.88069e-11	pseudopodium-enriched atypical kinase 1	Downregulated
EMILIN1	11117	12.7704	0	0.325922	0.001	-8.34838	0.0003253	0.000840421	elastin microfibril interfacer 1	Downregulated
C10orf76	79591	13.187	0	0.324854	0.001	-8.34365	0.00016628	0.000458236	chromosome 10 open reading frame 76	Downregulated
RXRA	6256	17.7912	0	0.324671	0.001	-8.34283	1.1352e-05	3.73908e-05	retinoid X receptor, alpha	Downregulated
DPCR1	135656	16.9582	0	0.322576	0.001	-8.3335	2.22082e-05	6.98388e-05	diffuse panbronchiolitis critical region 1	Downregulated
TBC1D4	9882	19.7057	0	0.320641	0.001	-8.32482	2.96612e-06	1.07351e-05	TBC1 domain family, member 4	Downregulated
IL17RD	54756	27.7665	0	0.320392	0.001	-8.32369	1.38246e-08	7.22719e-08	interleukin 17 receptor D	Downregulated
OTUD4	54726	22.3908	0	0.319482	0.001	-8.31959	3.96152e-07	1.65228e-06	OTU deubiquitinase 4	Downregulated
CPAMD8	27151	18.8088	0	0.31649	0.001	-8.30602	5.80272e-06	1.9906e-05	C3 and PZP-like, alpha-2-macroglobulin domain containing 8	Downregulated
OBFC1	79991	19.8318	0	0.30857	0.001	-8.26945	2.96612e-06	1.06939e-05	oligonucleotide/oligosaccharide-binding fold containing 1	Downregulated
ABCA13	154664	51.8537	0	0.30348	0.001	-8.24546	1.39973e-15	1.74723e-14	ATP-binding cassette, sub-family A (ABC1), member 13	Downregulated
CCNJ	54619	12.2302	0	0.300106	0.001	-8.22933	0.0003253	0.000840776	cyclin J	Downregulated
ZNF721	170960	13.8741	0	0.298317	0.001	-8.2207	0.00016628	0.000457823	zinc finger protein 721	Downregulated
A1CF	29974	27.3388	0	0.289157	0.001	-8.17571	1.38246e-08	7.21486e-08	APOBEC1 complementation factor	Downregulated
ZNF395	55893	13.7276	0	0.288327	0.001	-8.17156	0.00016628	0.000458339	zinc finger protein 395	Downregulated
EML4	27436	15.4194	0	0.288023	0.001	-8.17004	4.34468e-05	0.000132772	echinoderm microtubule associated protein like 4	Downregulated
ATXN2	6311	13.3862	0	0.286845	0.001	-8.16413	0.00016628	0.000459063	ataxin 2	Downregulated
KIAA1217	56243	22.0566	0	0.286623	0.001	-8.16301	3.96152e-07	1.65453e-06	KIAA1217	Downregulated
TRPM3	80036	16.7332	0	0.285674	0.001	-8.15823	2.22082e-05	6.96062e-05	transient receptor potential cation channel, subfamily M, member 3	Downregulated
MAPT	4137	15.1105	0	0.275053	0.001	-8.10357	4.34468e-05	0.000132871	microtubule-associated protein tau	Downregulated
LDOC1L	84247	14.5341	0	0.273927	0.001	-8.09765	8.49962e-05	0.000244995	leucine zipper, down-regulated in cancer 1-like	Downregulated
ZNF473	25888	12.2896	0	0.270431	0.001	-8.07912	0.0003253	0.000845241	zinc finger protein 473	Downregulated
FAM84B	157638	14.0813	0	0.258234	0.001	-8.01254	8.49962e-05	0.000245168	family with sequence similarity 84, member B	Downregulated
PREX1	57580	16.9097	0	0.257138	0.001	-8.0064	2.22082e-05	6.97671e-05	phosphatidylinositol-3,4,5-trisphosphate-dependent Rac exchange factor 1	Downregulated
PAX6	5080	17.2648	0	0.253941	0.001	-7.98835	1.1352e-05	3.74917e-05	paired box 6	Downregulated
RNF217	154214	12.6194	0	0.253261	0.001	-7.98448	0.0003253	0.000843628	ring finger protein 217	Downregulated
CCDC88C	440193	18.9937	0	0.252898	0.001	-7.98241	5.80272e-06	1.99563e-05	coiled-coil domain containing 88C	Downregulated
AHCYL2	23382	12.0103	0	0.24333	0.001	-7.92677	0.0003253	0.000840954	adenosylhomocysteinase-like 2	Downregulated
CABIN1	23523	17.0508	0	0.243151	0.001	-7.92571	1.1352e-05	3.75322e-05	calcineurin binding protein 1	Downregulated
RBFA	79863	12.5627	0	0.226627	0.001	-7.82418	0.0003253	0.000842735	ribosome binding factor A (putative)	Downregulated
C5orf42	65250	24.4033	0	0.219209	0.001	-7.77616	1.03509e-07	4.7265e-07	chromosome 5 open reading frame 42	Downregulated
GPR124	25960	12.6555	0	0.211044	0.001	-7.7214	0.0003253	0.000842914	adhesion G protein-coupled receptor A2	Downregulated
CLCN4	1183	13.5116	0	0.208587	0.001	-7.70451	0.00016628	0.000456898	chloride channel, voltage-sensitive 4	Downregulated
ANKS1A	23294	12.3245	0	0.195634	0.001	-7.61201	0.0003253	0.000841132	ankyrin repeat and sterile alpha motif domain containing 1A	Downregulated
CAMSAP2	23271	13.5987	0	0.187311	0.001	-7.54929	0.00016628	0.000458649	calmodulin regulated spectrin-associated protein family, member 2	Downregulated
FREM2	341640	29.0848	0	0.18105	0.001	-7.50024	3.61218e-09	2.04573e-08	FRAS1 related extracellular matrix protein 2	Downregulated
MEGF6	1953	13.3313	0	0.180441	0.001	-7.49538	0.00016628	0.000458856	multiple EGF-like-domains 6	Downregulated
GAREM	64762	12.5215	0	0.179169	0.001	-7.48518	0.0003253	0.000843092	GRB2 associated, regulator of MAPK1	Downregulated
PLXNB1	5364	12.2635	0	0.172776	0.001	-7.43276	0.0003253	0.000840599	plexin B1	Downregulated
ABCA1	19	16.7441	0	0.160466	0.001	-7.32612	2.22082e-05	6.96955e-05	ATP-binding cassette, sub-family A (ABC1), member 1	Downregulated
ATP2B4	493	12.7473	0	0.146802	0.001	-7.19773	0.0003253	0.000842378	ATPase, Ca++ transporting, plasma membrane 4	Downregulated
COL12A1	1303	16.2967	0	0.141806	0.001	-7.14777	2.22082e-05	6.9785e-05	collagen, type XII, alpha 1	Downregulated
NBEAL2	23218	12.365	0	0.1409	0.001	-7.13853	0.0003253	0.000841844	neurobeachin-like 2	Downregulated
MRPL2	51069	37.9751	0.530303	2.90315	0.0253388	-6.84013	1.68357e-11	1.29285e-10	mitochondrial ribosomal protein L2	Downregulated
PRUNE2	158471	13.4531	0	0.107546	0.001	-6.74881	0.00016628	0.000458752	prune homolog 2 (Drosophila)	Downregulated
OBSCN	84033	21.6785	0	0.106833	0.001	-6.73921	7.75006e-07	3.08414e-06	obscurin, cytoskeletal calmodulin and titin-interacting RhoGEF	Downregulated
CD70	970	16.577	0.365889	1.86133	0.024234	-6.26316	2.22082e-05	6.98568e-05	CD70 molecule	Downregulated
ATIC	471	61.2898	1.55704	2.96878	0.0444883	-6.0603	5.33676e-17	7.83729e-16	5-aminoimidazole-4-carboxamide ribonucleotide formyltransferase/IMP cyclohydrolase	Downregulated
DAXX	1616	80.8952	2.22413	3.2752	0.0561184	-5.86696	4.12562e-21	9.17613e-20	death-domain associated protein	Downregulated
CDK5	1020	23.2118	0.74753	2.12683	0.0404026	-5.71811	2.02498e-07	8.80611e-07	cyclin-dependent kinase 5	Downregulated
RBM4	5936	26.2982	1.51818	2.43756	0.0530914	-5.52082	3.84008e-07	1.61041e-06	RNA binding motif protein 4	Downregulated
FLRT3	23767	93.5971	3.66147	2.46958	0.0569864	-5.4375	1.4322e-23	4.10307e-22	fibronectin leucine rich transmembrane protein 3	Downregulated
ADIPOR1	51094	54.4256	2.20676	2.696	0.0644806	-5.38581	7.401e-14	7.63376e-13	adiponectin receptor 1	Downregulated
ZNF212	7988	68.7828	2.81671	2.47408	0.0597629	-5.3715	9.50946e-18	1.52663e-16	zinc finger protein 212	Downregulated
KANSL2	54934	43.1849	1.79958	1.82167	0.0447781	-5.34632	6.7598e-12	5.45826e-11	KAT8 regulatory NSL complex subunit 2	Downregulated
ITPA	3704	25.5649	1.08667	2.56262	0.0659387	-5.28035	7.25384e-07	2.8942e-06	inosine triphosphatase (nucleoside triphosphate pyrophosphatase)	Downregulated
MZT2A	653784	42.5287	2.0975	6.192	0.180139	-5.10322	1.45751e-10	9.92747e-10	mitotic spindle organizing protein 2A	Downregulated
RNF167	26001	34.3137	1.7128	2.02356	0.0595814	-5.08589	2.28276e-09	1.30613e-08	ring finger protein 167	Downregulated
FEN1	2237	38.6955	2.04133	1.69927	0.0528775	-5.00612	1.77671e-09	1.05049e-08	flap structure-specific endonuclease 1	Downregulated
ZCCHC8	55596	104.255	5.72559	2.47201	0.0800811	-4.94808	1.79855e-24	5.69993e-23	zinc finger, CCHC domain containing 8	Downregulated
FKBP1A	2280	50.7655	3.43962	4.13069	0.134913	-4.93628	8.4321e-12	6.75949e-11	FK506 binding protein 1A, 12kDa	Downregulated
CHST12	55501	46.8217	2.86979	2.22827	0.0805616	-4.78969	1.17733e-11	9.31586e-11	carbohydrate (chondroitin 4) sulfotransferase 12	Downregulated
GARNL3	84253	62.5898	3.885	1.75085	0.0641143	-4.77127	4.89336e-15	5.823e-14	GTPase activating Rap/RanGAP domain-like 3	Downregulated
B4GALT2	8704	24.6901	1.54768	1.24125	0.0461077	-4.75064	1.36849e-06	5.19899e-06	UDP-Gal:betaGlcNAc beta 1,4- galactosyltransferase, polypeptide 2	Downregulated
P4HTM	54681	29.1863	1.84595	1.40226	0.0523151	-4.74438	5.65852e-08	2.69761e-07	prolyl 4-hydroxylase, transmembrane (endoplasmic reticulum)	Downregulated
MTRNR2L9	100463487	25.7521	1.63626	5.08006	0.190399	-4.73775	7.25384e-07	2.89515e-06	MT-RNR2-like 9	Downregulated
MAN1B1	11253	55.6295	3.63133	2.03887	0.0785066	-4.69881	3.83594e-13	3.59029e-12	mannosidase, alpha, class 1B, member 1	Downregulated
FBXO7	25793	28.9271	1.95922	1.36248	0.0544333	-4.6456	1.07245e-07	4.87343e-07	F-box protein 7	Downregulated
SRPK2	6733	68.6354	5.11779	1.87335	0.0823968	-4.50689	7.5432e-15	8.68889e-14	SRSF protein kinase 2	Downregulated
APEH	327	62.1178	4.7416	2.26594	0.102027	-4.47309	4.07532e-14	4.294e-13	acylaminoacyl-peptide hydrolase	Downregulated
TSPAN33	340348	34.4084	2.62789	1.18552	0.053408	-4.47232	2.12598e-08	1.06849e-07	tetraspanin 33	Downregulated
IMPDH1	3614	41.8673	3.10984	1.77129	0.0801359	-4.46621	2.05096e-09	1.1757e-08	IMP (inosine 5'-monophosphate) dehydrogenase 1	Downregulated
KIF18B	146909	90.2971	6.99527	2.25049	0.103062	-4.44866	8.70778e-20	1.69892e-18	kinesin family member 18B	Downregulated
BRCC3	79184	45.7164	3.56536	1.60167	0.073981	-4.43628	1.80653e-10	1.22298e-09	BRCA1/BRCA2-containing complex, subunit 3	Downregulated
MRPL38	64978	18.6436	1.46423	1.1745	0.0544112	-4.432	5.9698e-05	0.000175634	mitochondrial ribosomal protein L38	Downregulated
EFR3A	23167	88.8665	7.01779	1.65168	0.0769388	-4.42408	1.99265e-18	3.40924e-17	EFR3 homolog A (S. cerevisiae)	Downregulated
PSMB7	5695	66.815	5.35098	6.55169	0.309506	-4.40383	2.51326e-14	2.69454e-13	proteasome (prosome, macropain) subunit, beta type, 7	Downregulated
TMX1	81542	152.012	12.2725	3.72828	0.17755	-4.39221	5.869e-31	3.1628e-29	thioredoxin-related transmembrane protein 1	Downregulated
MSANTD3	91283	16.9182	1.37955	0.959343	0.0462537	-4.37441	0.000206764	0.000546885	Myb/SANT-like DNA-binding domain containing 3	Downregulated
ARGLU1	55082	52.833	4.41618	3.02869	0.149332	-4.3421	1.74629e-11	1.33598e-10	arginine and glutamate rich 1	Downregulated
PID1	55022	47.0037	3.93301	1.81253	0.089461	-4.3406	5.32056e-11	3.87189e-10	phosphotyrosine interaction domain containing 1	Downregulated
TYW1B	441250	41.7749	3.50184	1.33254	0.0658898	-4.33798	2.05096e-09	1.17625e-08	tRNA-yW synthesizing protein 1 homolog B (S. cerevisiae)	Downregulated
OST4	100128731	32.6093	2.74388	6.66811	0.330965	-4.33253	7.294e-08	3.36835e-07	oligosaccharyltransferase 4 homolog (S. cerevisiae)	Downregulated
PIGM	93183	57.5019	4.9013	1.3438	0.0675649	-4.3139	8.54802e-13	7.68317e-12	phosphatidylinositol glycan anchor biosynthesis, class M	Downregulated
HOXA10	3206	22.5298	2.29761	0.992697	0.0518248	-4.25964	3.0978e-05	9.5962e-05	homeobox A10	Downregulated
FAM172BP	131909	83.4131	7.40087	3.6839	0.192802	-4.25604	3.89724e-17	5.77178e-16	family with sequence similarity 172, member B pseudogene	Downregulated
ZNF146	7705	59.9161	5.38517	1.60831	0.0852674	-4.23741	1.64228e-12	1.435e-11	zinc finger protein 146	Downregulated
PJA2	9867	82.4469	7.52429	1.70638	0.0918592	-4.21537	7.04546e-17	1.01756e-15	praja ring finger 2, E3 ubiquitin protein ligase	Downregulated
PDCD7	10081	48.1579	4.44697	1.7006	0.0926307	-4.19841	1.90841e-10	1.28697e-09	programmed cell death 7	Downregulated
SETD1A	9739	207.033	19.3716	3.19559	0.176374	-4.17937	1.44981e-39	1.44191e-37	SET domain containing 1A	Downregulated
PLCXD2	257068	58.9617	5.55342	2.89929	0.161079	-4.16986	2.97014e-12	2.54616e-11	phosphatidylinositol-specific phospholipase C, X domain containing 2	Downregulated
GJB3	2707	38.6103	3.58119	2.17261	0.120753	-4.1693	1.2493e-08	6.57885e-08	gap junction protein, beta 3, 31kDa	Downregulated
MRPL4	51073	22.4748	3.34463	1.48275	0.0831531	-4.15636	0.000137414	0.000382128	mitochondrial ribosomal protein L4	Downregulated
IDH1	3417	118.195	11.2548	5.17907	0.290903	-4.15408	5.0917e-23	1.38415e-21	isocitrate dehydrogenase 1 (NADP+), soluble	Downregulated
CRAT	1384	27.061	2.60312	0.990365	0.0561956	-4.13943	1.5443e-06	5.81453e-06	carnitine O-acetyltransferase	Downregulated
DKC1	1736	44.1307	3.77661	1.49944	0.0870039	-4.1072	3.32268e-10	2.14719e-09	dyskeratosis congenita 1, dyskerin	Downregulated
PHLDB3	653583	26.5829	2.67173	1.07492	0.0637273	-4.07617	2.82698e-06	1.02467e-05	pleckstrin homology-like domain, family B, member 3	Downregulated
TXNDC5	81567	56.0191	5.75238	1.77284	0.107418	-4.04475	9.67812e-12	7.70784e-11	thioredoxin domain containing 5 (endoplasmic reticulum)	Downregulated
PRMT6	55170	27.3661	2.84344	1.03973	0.0637248	-4.02821	1.5443e-06	5.81632e-06	protein arginine methyltransferase 6	Downregulated
HDDC2	51020	28.7581	3.01356	1.81055	0.111915	-4.01595	4.55234e-06	1.61792e-05	HD domain containing 2	Downregulated
TRPC4AP	26133	61.7805	6.51984	1.97444	0.122909	-4.00578	2.82158e-12	2.4205e-11	transient receptor potential cation channel, subfamily C, member 4 associated protein	Downregulated
PLEKHA8P1	51054	30.8048	3.26283	1.6582	0.103602	-4.00049	1.42546e-06	5.40032e-06	pleckstrin homology domain containing, family A member 8 pseudogene 1	Downregulated
EXOSC8	11340	16.2497	1.72205	1.15945	0.0724786	-3.99974	0.000206764	0.000547003	exosome component 8	Downregulated
ENOX2	10495	32.1592	3.4443	0.805034	0.0508588	-3.98448	4.41788e-07	1.83698e-06	ecto-NOX disulfide-thiol exchanger 2	Downregulated
DDX19B	11269	16.1563	1.73156	1.00583	0.0635887	-3.98347	0.000206764	0.00054724	DEAD (Asp-Glu-Ala-Asp) box polypeptide 19B	Downregulated
RFC3	5983	20.4914	1.33831	0.866569	0.054925	-3.97978	1.70805e-05	5.53353e-05	replication factor C (activator 1) 3, 38kDa	Downregulated
LMF1	64788	20.8712	2.25367	0.806677	0.0513807	-3.97269	0.000100774	0.000283394	lipase maturation factor 1	Downregulated
BUB3	9184	33.7497	3.6784	2.2077	0.141934	-3.95925	2.4509e-07	1.06093e-06	BUB3 mitotic checkpoint protein	Downregulated
TMEM167B	56900	31.5026	3.43585	1.15208	0.0741184	-3.95827	7.9453e-07	3.1475e-06	transmembrane protein 167B	Downregulated
VPS4A	27183	44.7379	4.89051	2.05147	0.132282	-3.95497	2.03796e-09	1.16934e-08	vacuolar protein sorting 4 homolog A (S. cerevisiae)	Downregulated
RNF170	81790	26.6748	3.95407	0.961905	0.0622753	-3.94916	1.43711e-05	4.67556e-05	ring finger protein 170	Downregulated
RHOT2	89941	38.3565	4.2443	1.51986	0.0992032	-3.93741	6.74976e-08	3.19666e-07	ras homolog family member T2	Downregulated
FAM3A	60343	56.2908	6.57396	3.12157	0.205116	-3.92776	5.06534e-11	3.69055e-10	family with sequence similarity 3, member A	Downregulated
RPL13AP6	644511	17.6354	1.96994	2.78969	0.183814	-3.92379	0.000111239	0.000311608	ribosomal protein L13a pseudogene 6	Downregulated
PKP4	8502	35.9533	5.8628	1.14214	0.0765685	-3.89884	1.5611e-06	5.876e-06	plakophilin 4	Downregulated
B4GALT1	2683	37.1035	4.29655	0.88941	0.0607524	-3.87184	1.201e-07	5.43337e-07	UDP-Gal:betaGlcNAc beta 1,4- galactosyltransferase, polypeptide 1	Downregulated
PRPSAP2	5636	22.7196	2.63279	1.37447	0.0939522	-3.8708	3.0978e-05	9.59863e-05	phosphoribosyl pyrophosphate synthetase-associated protein 2	Downregulated
NAPEPLD	222236	93.659	10.9576	1.86773	0.128895	-3.85702	1.8354e-17	2.8242e-16	N-acyl phosphatidylethanolamine phospholipase D	Downregulated
MAP3K11	4296	44.5062	5.26938	1.25882	0.0879141	-3.83983	1.02092e-08	5.39945e-08	mitogen-activated protein kinase kinase kinase 11	Downregulated
LRFN4	78999	19.84	2.36936	0.789261	0.0555989	-3.82737	0.000180812	0.000495602	leucine rich repeat and fibronectin type III domain containing 4	Downregulated
DUSP6	1848	20.077	2.40555	0.687033	0.0485568	-3.82263	0.000100774	0.000283329	dual specificity phosphatase 6	Downregulated
EI24	9538	31.0828	3.48981	1.3782	0.0975517	-3.82047	7.9453e-07	3.14648e-06	etoposide induced 2.4	Downregulated
LEO1	123169	21.1784	2.3426	0.975142	0.0693372	-3.81391	5.59648e-05	0.000164809	Leo1, Paf1/RNA polymerase II complex component, homolog (S. cerevisiae)	Downregulated
TSC1	7248	68.0298	8.27058	0.809396	0.0580435	-3.80164	1.20827e-12	1.07731e-11	tuberous sclerosis 1	Downregulated
DGAT1	8694	40.7185	4.96267	1.10598	0.079511	-3.79803	2.1182e-08	1.06502e-07	diacylglycerol O-acyltransferase 1	Downregulated
SENP2	59343	32.1338	3.94724	1.01344	0.073432	-3.78671	4.41788e-07	1.83635e-06	SUMO1/sentrin/SMT3 specific peptidase 2	Downregulated
PLCG1	5335	90.4072	11.1991	1.75395	0.128179	-3.77438	4.66186e-16	6.1387e-15	phospholipase C, gamma 1	Downregulated
SPRYD4	283377	20.8097	2.61931	0.994583	0.0738445	-3.75153	0.000100774	0.00028346	SPRY domain containing 4	Downregulated
PSMD5	5711	91.1261	11.6457	2.73017	0.205811	-3.7296	2.66392e-16	3.63297e-15	proteasome (prosome, macropain) 26S subunit, non-ATPase, 5	Downregulated
MIS12	79003	23.509	3.01088	1.1674	0.0881934	-3.72648	7.85974e-05	0.000228381	MIS12 kinetochore complex component	Downregulated
HEBP1	50865	24.3398	3.12817	2.03384	0.154187	-3.72145	4.47746e-05	0.000132782	heme binding protein 1	Downregulated
DESI2	51029	63.5984	8.45658	1.60232	0.122643	-3.70763	1.98932e-11	1.51717e-10	desumoylating isopeptidase 2	Downregulated
ANKRD29	147463	28.9431	3.77152	1.28051	0.0984257	-3.70154	4.55234e-06	1.61745e-05	ankyrin repeat domain 29	Downregulated
OSBPL3	26031	73.8061	10.3907	1.17605	0.0910968	-3.69041	1.35218e-12	1.20038e-11	oxysterol binding protein-like 3	Downregulated
SPTSSA	171546	107.78	14.1599	4.30124	0.333327	-3.68974	2.93402e-18	4.98498e-17	serine palmitoyltransferase, small subunit A	Downregulated
KIAA2018	205717	127.587	16.7717	0.937559	0.0726983	-3.68892	8.3235e-22	1.97711e-20	KIAA2018	Downregulated
TMEM185B	79134	37.3126	5.01038	0.633997	0.0502179	-3.6582	5.19878e-07	2.14636e-06	transmembrane protein 185B	Downregulated
AKAP8L	26993	55.585	6.78109	2.48654	0.19814	-3.64955	8.98392e-11	6.31611e-10	A kinase (PRKA) anchor protein 8-like	Downregulated
ALOXE3	59344	41.1821	5.58679	1.28114	0.102519	-3.64346	5.58096e-08	2.66271e-07	arachidonate lipoxygenase 3	Downregulated
NELFB	25920	31.8604	4.36403	1.23047	0.0994176	-3.62956	3.61646e-06	1.29471e-05	negative elongation factor complex member B	Downregulated
IFI27L2	83982	20.2631	2.83429	4.51018	0.372124	-3.59933	0.000100774	0.000283525	interferon, alpha-inducible protein 27-like 2	Downregulated
HSPB8	26353	23.9964	3.42383	1.18401	0.0996502	-3.57066	7.85974e-05	0.000228435	heat shock 22kDa protein 8	Downregulated
EPAS1	2034	39.6332	5.92799	0.771699	0.068085	-3.50263	1.71206e-07	7.51477e-07	endothelial PAS domain protein 1	Downregulated
ZC3H13	23091	55.3327	8.35026	0.870635	0.0775015	-3.48977	1.61013e-09	9.55685e-09	zinc finger CCCH-type containing 13	Downregulated
INO80B-WBP1	100532735	28.3085	4.3239	1.35944	0.122483	-3.47236	1.90632e-05	6.14979e-05	INO80B-WBP1 readthrough (NMD candidate)	Downregulated
ULK4	54986	23.0304	3.5214	0.525637	0.0474085	-3.47085	7.85974e-05	0.000228326	unc-51 like kinase 4	Downregulated
FASTKD2	22868	141.614	21.741	2.08904	0.189181	-3.465	4.20152e-22	1.02589e-20	FAST kinase domains 2	Downregulated
CCDC97	90324	42.8108	6.57461	1.29458	0.117273	-3.46454	1.30133e-07	5.88073e-07	coiled-coil domain containing 97	Downregulated
CRNKL1	51340	31.357	4.82484	0.782615	0.0710319	-3.46176	3.61646e-06	1.29433e-05	crooked neck pre-mRNA splicing factor 1	Downregulated
ZNF517	340385	21.8174	3.42014	0.946929	0.0875614	-3.43489	0.000239202	0.000630094	zinc finger protein 517	Downregulated
NECAB3	63941	31.0193	5.13355	1.60532	0.1489	-3.43045	1.35486e-05	4.42683e-05	N-terminal EF-hand calcium binding protein 3	Downregulated
FARSA	2193	40.2482	6.34859	2.20547	0.205205	-3.42595	3.85272e-07	1.61516e-06	phenylalanyl-tRNA synthetase, alpha subunit	Downregulated
TBC1D9	23158	36.2641	5.75423	0.664557	0.062201	-3.41738	9.022e-07	3.5579e-06	TBC1 domain family, member 9 (with GRAM domain)	Downregulated
POLD1	5424	84.0755	13.3576	2.52947	0.237053	-3.41555	1.95583e-13	1.89435e-12	polymerase (DNA directed), delta 1, catalytic subunit	Downregulated
VAV2	7410	73.336	11.684	1.55952	0.146562	-3.41152	5.18968e-12	4.30409e-11	vav 2 guanine nucleotide exchange factor	Downregulated
RGS7	6000	22.9317	3.76636	0.983409	0.0952745	-3.36763	0.000137414	0.000382215	regulator of G-protein signaling 7	Downregulated
S100A2	6273	94.8215	15.6727	10.0102	0.975963	-3.3585	1.25342e-14	1.40156e-13	S100 calcium binding protein A2	Downregulated
BIRC5	332	94.9242	15.6845	3.57411	0.348849	-3.35691	1.25342e-14	1.40028e-13	baculoviral IAP repeat containing 5	Downregulated
MTX2	10651	27.3594	4.86813	1.85603	0.182155	-3.34898	3.29404e-05	0.000101912	metaxin 2	Downregulated
NEK4	6787	21.8406	3.42045	0.589406	0.0586495	-3.32907	0.000239202	0.00063023	NIMA-related kinase 4	Downregulated
TTLL12	23170	39.2674	6.68795	1.16056	0.116597	-3.31522	6.60124e-07	2.64417e-06	tubulin tyrosine ligase-like family member 12	Downregulated
LIMK1	3984	131.947	21.0329	3.92629	0.395123	-3.31279	8.43614e-20	1.64855e-18	LIM domain kinase 1	Downregulated
PIN1	5300	31.4307	5.39522	3.75106	0.379809	-3.30395	1.35486e-05	4.42447e-05	peptidylprolyl cis/trans isomerase, NIMA-interacting 1	Downregulated
ZBTB22	9278	50.1837	8.6703	1.90709	0.193145	-3.30362	2.34816e-08	1.17726e-07	zinc finger and BTB domain containing 22	Downregulated
BTAF1	9044	67.3482	11.5827	0.962864	0.0976798	-3.3012	1.25113e-10	8.5599e-10	BTAF1 RNA polymerase II, B-TFIID transcription factor-associated, 170kDa	Downregulated
IDNK	414328	28.9743	5.0443	1.79164	0.183991	-3.28357	6.588e-05	0.000193217	idnK, gluconokinase homolog (E. coli)	Downregulated
RASSF2	9770	45.1202	7.88911	0.858108	0.0885024	-3.27737	9.50808e-08	4.36444e-07	Ras association (RalGDS/AF-6) domain family member 2	Downregulated
EYA3	2140	50.4803	8.86171	0.862837	0.089347	-3.2716	2.34816e-08	1.17677e-07	EYA transcriptional coactivator and phosphatase 3	Downregulated
GDF15	9518	38.861	6.85254	3.24994	0.33804	-3.26515	1.12769e-06	4.41018e-06	growth differentiation factor 15	Downregulated
SRPK1	6732	40.3723	7.16636	0.930946	0.0974756	-3.25558	1.32859e-06	5.05053e-06	SRSF protein kinase 1	Downregulated
PRR14	78994	61.0054	10.8905	2.87204	0.302431	-3.2474	8.50328e-10	5.24033e-09	proline rich 14	Downregulated
AEN	64782	45.3779	8.10605	1.46465	0.154332	-3.24645	3.21864e-07	1.35444e-06	apoptosis enhancing nuclease	Downregulated
SEH1L	81929	36.1297	6.45827	1.93964	0.204517	-3.2455	3.25984e-06	1.17356e-05	SEH1-like (S. cerevisiae)	Downregulated
LOC100128494	100128494	78.0479	13.952	1.86246	0.19639	-3.24542	4.618e-12	3.84823e-11	uncharacterized LOC100128494	Downregulated
VASH1	22846	31.9228	5.77918	0.534117	0.0570372	-3.22718	1.35486e-05	4.42565e-05	vasohibin 1	Downregulated
DOCK3	1795	62.4922	11.331	0.717709	0.0767623	-3.22493	1.68322e-09	9.97133e-09	dedicator of cytokinesis 3	Downregulated
PSMC5	5705	62.6491	11.3961	4.6516	0.499114	-3.22029	1.68322e-09	9.96651e-09	proteasome (prosome, macropain) 26S subunit, ATPase, 5	Downregulated
LRCH3	84859	48.8817	8.90029	2.13077	0.22885	-3.2189	6.7454e-08	3.19584e-07	leucine-rich repeats and calponin homology (CH) domain containing 3	Downregulated
TAP2	6891	46.3622	8.45798	1.84873	0.198945	-3.21609	1.91724e-07	8.37329e-07	transporter 2, ATP-binding cassette, sub-family B (MDR/TAP)	Downregulated
FBXO17	115290	24.5099	4.58212	1.12404	0.12194	-3.20445	0.000165797	0.000458349	F-box protein 17	Downregulated
SLC2A4RG	56731	30.5661	5.62368	1.34934	0.14644	-3.20387	2.3047e-05	7.20138e-05	SLC2A4 regulator	Downregulated
POLR3C	10623	25.6185	4.65052	0.684481	0.0744896	-3.1999	9.71708e-05	0.000273703	polymerase (RNA) III (DNA directed) polypeptide C (62kD)	Downregulated
ETFA	2108	42.1971	7.83054	3.14002	0.343715	-3.19149	4.66782e-07	1.93696e-06	electron-transfer-flavoprotein, alpha polypeptide	Downregulated
TBL1XR1	79718	70.8257	13.1432	1.0907	0.119391	-3.19149	2.83868e-10	1.84318e-09	transducin (beta)-like 1 X-linked receptor 1	Downregulated
2002-08-01	27161	69.2937	12.8733	2.04981	0.224629	-3.18987	1.4825e-10	1.00697e-09	argonaute RISC catalytic component 2	Downregulated
UNC13B	10497	76.7783	14.5173	1.21053	0.135015	-3.16445	4.2209e-11	3.09558e-10	unc-13 homolog B (C. elegans)	Downregulated
PLIN2	123	54.1323	10.2988	2.70679	0.303768	-3.15554	3.18822e-08	1.58029e-07	perilipin 2	Downregulated
YY1AP1	55249	88.228	18.4017	3.45512	0.3878	-3.15535	8.55654e-12	6.85476e-11	YY1 associated protein 1	Downregulated
ST6GALNAC4	27090	29.4062	5.87346	1.82596	0.205035	-3.15471	3.90482e-05	0.000120261	ST6 (alpha-N-acetyl-neuraminyl-2,3-beta-galactosyl-1,3)-N-acetylgalactosaminide alpha-2,6-sialyltransferase 4	Downregulated
NLGN1	22871	31.0452	5.94702	0.63354	0.0715872	-3.14566	1.35486e-05	4.42211e-05	neuroligin 1	Downregulated
FBXO18	84893	71.5885	13.562	1.97396	0.224375	-3.13711	1.70784e-10	1.15745e-09	F-box protein, helicase, 18	Downregulated
HK2	3099	101.265	19.7283	1.43654	0.165084	-3.12133	3.97962e-14	4.20403e-13	hexokinase 2	Downregulated
MAP7	9053	46.4281	9.03879	1.10033	0.12687	-3.11651	5.98252e-07	2.40342e-06	microtubule-associated protein 7	Downregulated
METTL16	79066	36.5776	7.1949	0.640994	0.0743738	-3.10744	1.03395e-05	3.49885e-05	methyltransferase like 16	Downregulated
DHX35	60625	29.5713	5.81737	0.922215	0.107015	-3.10729	3.90482e-05	0.000120231	DEAH (Asp-Glu-Ala-His) box polypeptide 35	Downregulated
DHX38	9785	30.5571	6.05914	0.690377	0.0807497	-3.09586	7.21224e-05	0.000210115	DEAH (Asp-Glu-Ala-His) box polypeptide 38	Downregulated
PIK3C2B	5287	43.3741	8.64471	0.575006	0.0676003	-3.08848	8.9899e-07	3.54639e-06	phosphatidylinositol-4-phosphate 3-kinase, catalytic subunit type 2 beta	Downregulated
HYAL2	8692	27.8928	5.61349	1.41157	0.167571	-3.07446	0.000110652	0.000310177	hyaluronoglucosaminidase 2	Downregulated
ARL6IP5	10550	63.0649	12.7426	2.99563	0.357038	-3.06871	3.1716e-09	1.80122e-08	ADP-ribosylation factor-like 6 interacting protein 5	Downregulated
FBXO42	54455	81.1078	16.4618	1.30853	0.156658	-3.06226	3.17674e-11	2.35522e-10	F-box protein 42	Downregulated
CITED2	10370	46.6339	8.87836	2.44486	0.293597	-3.05784	1.91724e-07	8.3703e-07	Cbp/p300-interacting transactivator, with Glu/Asp-rich carboxy-terminal domain, 2	Downregulated
CRYZ	1429	25.9782	4.64556	1.15804	0.139731	-3.05096	9.71708e-05	0.000273766	crystallin, zeta (quinone reductase)	Downregulated
GGA2	23062	120.672	24.6954	2.03835	0.246062	-3.05031	7.58478e-16	9.75653e-15	golgi-associated, gamma adaptin ear containing, ARF binding protein 2	Downregulated
RAB11A	8766	57.1326	11.702	1.1898	0.14375	-3.04909	2.14214e-08	1.07617e-07	RAB11A, member RAS oncogene family	Downregulated
DDX6	1656	138.63	28.8734	2.26562	0.277612	-3.02876	7.9046e-18	1.27569e-16	DEAD (Asp-Glu-Ala-Asp) box helicase 6	Downregulated
IFNGR2	3460	52.6944	10.979	2.39125	0.293887	-3.02443	8.78154e-08	4.04308e-07	interferon gamma receptor 2 (interferon gamma transducer 1)	Downregulated
SRR	63826	35.1955	7.45963	1.42205	0.177787	-2.99975	1.711e-05	5.54162e-05	serine racemase	Downregulated
TMEM14C	51522	26.3663	5.62302	2.2672	0.285211	-2.99081	0.000184971	0.000493834	transmembrane protein 14C	Downregulated
MYO19	80179	45.3332	9.73973	1.03632	0.131334	-2.98016	9.87028e-07	3.87121e-06	myosin XIX	Downregulated
SDHA	6389	90.1424	18.4211	3.25518	0.413775	-2.97582	3.19592e-12	2.69625e-11	succinate dehydrogenase complex, subunit A, flavoprotein (Fp)	Downregulated
ADNP2	22850	27.347	5.91259	0.511012	0.0651711	-2.97105	0.000110652	0.000310248	ADNP homeobox 2	Downregulated
CEP128	145508	45.2076	9.78128	1.02344	0.130618	-2.97	9.87028e-07	3.86997e-06	centrosomal protein 128kDa	Downregulated
STEAP3	55240	44.3267	9.60049	1.13735	0.145305	-2.96852	1.62315e-06	6.10014e-06	STEAP family member 3, metalloreductase	Downregulated
FZD3	7976	161.678	35.5436	1.18375	0.153506	-2.947	1.63583e-19	3.07864e-18	frizzled class receptor 3	Downregulated
NUP50	10762	37.7165	8.58369	0.75378	0.0978106	-2.94608	1.80574e-05	5.83609e-05	nucleoporin 50kDa	Downregulated
FRMD8	83786	60.2824	13.1105	1.6681	0.217268	-2.94065	4.04158e-08	1.95263e-07	FERM domain containing 8	Downregulated
UBXN2B	137886	48.5599	10.7657	0.96341	0.125988	-2.93486	6.43858e-07	2.58071e-06	UBX domain protein 2B	Downregulated
ELOVL5	60481	157.213	34.9668	5.23559	0.686891	-2.9302	4.03284e-19	7.41861e-18	ELOVL fatty acid elongase 5	Downregulated
SRSF5	6430	59.9432	14.625	4.02046	0.53116	-2.92014	1.72787e-07	7.58141e-07	serine/arginine-rich splicing factor 5	Downregulated
ZCCHC4	29063	45.4045	10.2683	1.63318	0.217866	-2.90617	2.7754e-06	1.00686e-05	zinc finger, CCHC domain containing 4	Downregulated
DAPK1	1612	71.5207	16.2207	1.25086	0.167121	-2.90395	4.11986e-09	2.27532e-08	death-associated protein kinase 1	Downregulated
MFI2	4241	25.6002	5.80166	1.53398	0.205062	-2.90315	0.000307644	0.000802775	antigen p97 (melanoma associated) identified by monoclonal antibodies 133.2 and 96.5	Downregulated
HECTD1	25831	62.0941	14.1495	0.680881	0.0915206	-2.89523	4.19296e-08	2.02417e-07	HECT domain containing E3 ubiquitin protein ligase 1	Downregulated
SNX5	27131	30.7155	7.02001	1.32285	0.17834	-2.89095	0.000198926	0.000528554	sorting nexin 5	Downregulated
ALG9	79796	97.2412	22.2262	1.59855	0.215524	-2.89084	6.5219e-12	5.26964e-11	ALG9, alpha-1,2-mannosyltransferase	Downregulated
PGD	5226	48.2142	11.1615	2.13686	0.291797	-2.87246	1.76111e-06	6.60239e-06	phosphogluconate dehydrogenase	Downregulated
ZDHHC5	25921	80.7836	18.7249	1.78037	0.243423	-2.87064	4.07816e-10	2.62155e-09	zinc finger, DHHC-type containing 5	Downregulated
LATS2	26524	90.9528	21.1692	1.65141	0.226725	-2.86468	6.67592e-11	4.74254e-10	large tumor suppressor kinase 2	Downregulated
SCARB2	950	51.2747	11.946	1.19329	0.163991	-2.86326	4.16136e-07	1.73267e-06	scavenger receptor class B, member 2	Downregulated
HECA	51696	47.6525	11.1997	0.855489	0.118602	-2.85062	2.82956e-06	1.0253e-05	headcase homolog (Drosophila)	Downregulated
LEPROTL1	23484	16.4295	1.14926	0.611287	0.0848292	-2.84922	0.000206764	0.000547122	leptin receptor overlapping transcript-like 1	Downregulated
SNRPD1	6632	35.288	8.12278	2.31899	0.322007	-2.84834	4.75774e-05	0.000140924	small nuclear ribonucleoprotein D1 polypeptide 16kDa	Downregulated
RAB1B	81876	62.6688	14.7698	3.2533	0.452277	-2.84663	4.19296e-08	2.02497e-07	RAB1B, member RAS oncogene family	Downregulated
CDC40	51362	30.56	7.22745	0.79879	0.111435	-2.84161	0.000198926	0.000528439	cell division cycle 40	Downregulated
FAM192A	80011	52.2465	12.403	1.84563	0.258446	-2.83618	6.93182e-07	2.77386e-06	family with sequence similarity 192, member A	Downregulated
HIRA	7290	57.0425	13.5568	1.43615	0.201333	-2.83455	1.7028e-07	7.47681e-07	histone cell cycle regulator	Downregulated
ACVR1B	91	55.1023	13.2673	1.2322	0.173157	-2.83108	4.37788e-07	1.82159e-06	activin A receptor, type IB	Downregulated
OGDHL	55753	75.732	18.2491	2.25352	0.320317	-2.81461	4.26452e-09	2.35415e-08	oxoglutarate dehydrogenase-like	Downregulated
PTPRF	5792	87.0572	21.0223	1.1391	0.162253	-2.81158	2.69136e-10	1.74845e-09	protein tyrosine phosphatase, receptor type, F	Downregulated
SFXN5	94097	30.8099	7.46124	0.751802	0.107394	-2.80744	0.000198926	0.000528324	sideroflexin 5	Downregulated
ARFGAP1	55738	43.6888	9.39238	1.38787	0.19843	-2.80617	2.66018e-06	9.66498e-06	ADP-ribosylation factor GTPase activating protein 1	Downregulated
PROSC	11212	27.399	6.66251	1.07299	0.153906	-2.80152	0.00031959	0.000831111	proline synthetase co-transcribed homolog (bacterial)	Downregulated
SMAD7	4092	56.798	13.889	1.86233	0.268658	-2.79327	2.73446e-07	1.18117e-06	SMAD family member 7	Downregulated
COPZ1	22818	41.881	10.0538	2.2341	0.323382	-2.78838	1.85131e-05	5.97548e-05	coatomer protein complex, subunit zeta 1	Downregulated
TEX10	54881	55.884	13.7381	1.87473	0.271853	-2.78578	4.37788e-07	1.82221e-06	testis expressed 10	Downregulated
GNPTAB	79158	89.8907	22.3249	1.60718	0.235449	-2.77105	2.68896e-10	1.74782e-09	N-acetylglucosamine-1-phosphate transferase, alpha and beta subunits	Downregulated
TMEM184A	202915	27.9472	6.98159	0.448004	0.0660168	-2.76261	0.00031959	0.000830934	transmembrane protein 184A	Downregulated
RABEP1	9135	112.692	28.2795	1.95509	0.289402	-2.75609	1.72621e-12	1.50404e-11	rabaptin, RAB GTPase binding effector protein 1	Downregulated
IL17RA	23765	31.54	7.83171	0.369514	0.0547498	-2.7547	0.000122942	0.000342508	interleukin 17 receptor A	Downregulated
ADRBK1	156	64.6109	16.4415	1.87815	0.281917	-2.73597	1.0805e-07	4.9082e-07	adrenergic, beta, receptor kinase 1	Downregulated
PDE4DIP	9659	45.7997	10.0013	0.812512	0.12296	-2.7242	2.7754e-06	1.00657e-05	phosphodiesterase 4D interacting protein	Downregulated
MARK2	2011	35.0231	9.05142	0.784059	0.119527	-2.71363	0.000120391	0.000335935	MAP/microtubule affinity-regulating kinase 2	Downregulated
LOC100289574	100289574	36.2953	9.40529	1.35695	0.207416	-2.70977	7.58982e-05	0.000220905	hect domain and RLD 2 pseudogene 4	Downregulated
KLHL29	114818	74.0292	19.2204	1.46987	0.22511	-2.70699	1.66722e-08	8.42775e-08	kelch-like family member 29	Downregulated
DOLK	22845	43.325	11.2643	1.93724	0.2971	-2.70498	1.81733e-05	5.86889e-05	dolichol kinase	Downregulated
SETD7	80854	129.272	33.7399	1.85928	0.286246	-2.69942	6.90882e-14	7.14418e-13	SET domain containing (lysine methyltransferase) 7	Downregulated
RALBP1	10928	91.2419	23.8573	2.10975	0.325398	-2.69679	2.6627e-10	1.7326e-09	ralA binding protein 1	Downregulated
TCEA1	6917	75.4901	22.7782	3.39813	0.528872	-2.68375	1.29175e-07	5.83963e-07	transcription elongation factor A (SII), 1	Downregulated
M6PR	4074	79.3753	18.9043	3.11212	0.486079	-2.67863	6.55052e-10	4.06351e-09	mannose-6-phosphate receptor (cation dependent)	Downregulated
MCMBP	79892	84.6123	22.4704	2.08074	0.326439	-2.67221	2.57232e-09	1.46769e-08	minichromosome maintenance complex binding protein	Downregulated
NT5C2	22978	79.7533	21.9727	2.32251	0.368977	-2.65408	1.00786e-08	5.33268e-08	5'-nucleotidase, cytosolic II	Downregulated
ZNF783	100289678	40.11	10.8157	0.909269	0.144627	-2.65237	2.94572e-05	9.15058e-05	zinc finger family member 783	Downregulated
STARD8	9754	68.4417	18.3858	1.41714	0.225481	-2.6519	1.03026e-07	4.71676e-07	StAR-related lipid transfer (START) domain containing 8	Downregulated
B3GAT3	26229	38.7083	11.5705	2.06499	0.330063	-2.64532	0.000169116	0.000464375	beta-1,3-glucuronyltransferase 3	Downregulated
VARS	7407	82.1636	22.4754	1.9264	0.310836	-2.63168	6.24884e-09	3.42176e-08	valyl-tRNA synthetase	Downregulated
TGS1	96764	31.9788	8.76399	0.871654	0.14091	-2.62898	0.000312286	0.0008135	trimethylguanosine synthase 1	Downregulated
DOT1L	84444	56.7131	15.5649	0.767104	0.124186	-2.62692	1.66535e-06	6.25683e-06	DOT1-like histone H3K79 methyltransferase	Downregulated
EIF2S1	1965	109.027	29.9526	2.64436	0.428527	-2.62546	1.58416e-11	1.2188e-10	eukaryotic translation initiation factor 2, subunit 1 alpha, 35kDa	Downregulated
C9orf64	84267	56.0139	15.5511	2.28338	0.373936	-2.61031	1.66535e-06	6.25491e-06	chromosome 9 open reading frame 64	Downregulated
GDAP2	54834	83.5961	35.4499	1.43932	0.237232	-2.60102	2.4436e-05	7.61594e-05	ganglioside induced differentiation associated protein 2	Downregulated
PLCD3	113026	84.3534	23.6312	2.44639	0.404264	-2.59728	6.00048e-09	3.2887e-08	phospholipase C, delta 3	Downregulated
LTBP4	8425	84.9346	24.257	1.71949	0.286096	-2.58741	1.35416e-08	7.09747e-08	latent transforming growth factor beta binding protein 4	Downregulated
SKP2	6502	63.1415	21.5302	2.34732	0.392415	-2.58056	8.55e-06	2.90372e-05	S-phase kinase-associated protein 2, E3 ubiquitin protein ligase	Downregulated
CAV2	858	39.5403	11.2348	1.3642	0.228644	-2.57688	0.000109259	0.000306412	caveolin 2	Downregulated
LTA4H	4048	67.9098	19.4324	3.34092	0.563918	-2.56669	3.66892e-07	1.54127e-06	leukotriene A4 hydrolase	Downregulated
SYNPO	11346	46.2382	11.4617	0.86466	0.147868	-2.54782	4.53012e-06	1.61049e-05	synaptopodin	Downregulated
TUSC3	7991	41.4097	12.1497	1.09461	0.187835	-2.54288	0.000102055	0.000286865	tumor suppressor candidate 3	Downregulated
TIMM17A	10440	48.4641	14.1001	2.94078	0.504684	-2.54275	2.43158e-05	7.58234e-05	translocase of inner mitochondrial membrane 17 homolog A (yeast)	Downregulated
DHCR7	1717	110.181	32.1391	4.22282	0.726585	-2.539	1.18841e-10	8.14899e-10	7-dehydrocholesterol reductase	Downregulated
WDR26	80232	109.928	32.0703	1.62187	0.279104	-2.53878	1.81128e-10	1.22552e-09	WD repeat domain 26	Downregulated
POFUT2	23275	39.0113	11.6822	1.37183	0.24232	-2.50112	0.000109259	0.000306482	protein O-fucosyltransferase 2	Downregulated
GLS	2744	131.669	39.3447	2.93972	0.519792	-2.49967	3.98254e-12	3.33459e-11	glutaminase	Downregulated
PLEKHM1	9842	36.0258	10.5222	0.717995	0.127151	-2.49743	0.000180515	0.000494899	pleckstrin homology domain containing, family M (with RUN domain) member 1	Downregulated
IPO4	79711	85.4413	25.6603	2.39509	0.424298	-2.49693	1.94465e-08	9.79371e-08	importin 4	Downregulated
CCDC47	57003	38.6698	11.6517	1.1349	0.201712	-2.4922	0.000169116	0.000464271	coiled-coil domain containing 47	Downregulated
MTHFD1L	25902	67.8674	18.8118	1.98606	0.353621	-2.48964	1.60652e-07	7.07946e-07	methylenetetrahydrofolate dehydrogenase (NADP+ dependent) 1-like	Downregulated
TAF6	6878	40.7001	12.4113	1.7642	0.31734	-2.47491	0.000156658	0.000433574	TAF6 RNA polymerase II, TATA box binding protein (TBP)-associated factor, 80kDa	Downregulated
EID1	23741	119.686	36.6412	5.79183	1.04592	-2.46925	5.9463e-11	4.24641e-10	EP300 interacting inhibitor of differentiation 1	Downregulated
RPL7A	6130	141.573	43.4638	16.3153	2.95459	-2.4652	1.30349e-12	1.15883e-11	ribosomal protein L7a	Downregulated
SHB	6461	121.91	37.5502	2.04279	0.371154	-2.46045	5.51174e-11	3.9453e-10	Src homology 2 domain containing adaptor protein B	Downregulated
TMCC2	9911	114.788	29.6534	2.88422	0.526879	-2.45264	1.70614e-12	1.48867e-11	transmembrane and coiled-coil domain family 2	Downregulated
TARDBP	23435	91.283	28.3139	2.17674	0.398266	-2.45036	1.55507e-08	8.07437e-08	TAR DNA binding protein	Downregulated
SLC25A37	51312	40.9943	12.7163	2.23177	0.408358	-2.45028	0.000156658	0.000433476	solute carrier family 25 (mitochondrial iron transporter), member 37	Downregulated
SMC1A	8243	120.067	37.8954	1.23677	0.230255	-2.42527	8.30336e-11	5.86122e-10	structural maintenance of chromosomes 1A	Downregulated
TCOF1	6949	73.1448	19.7259	1.5124	0.282325	-2.42142	2.61396e-08	1.30891e-07	Treacher Collins-Franceschetti syndrome 1	Downregulated
MYEOV	26579	43.3297	15.782	2.04276	0.381878	-2.41934	0.000391544	0.000983119	myeloma overexpressed	Downregulated
RPS9	6203	169.53	54.0567	23.1737	4.35867	-2.41053	4.63766e-14	4.8283e-13	ribosomal protein S9	Downregulated
PPIF	10105	42.2757	13.5529	1.9368	0.366253	-2.40276	0.000143776	0.000399366	peptidylprolyl isomerase F	Downregulated
EMX1	2016	62.5805	20.065	2.90005	0.548482	-2.40256	6.34012e-06	2.1713e-05	empty spiracles homeobox 1	Downregulated
GMPS	8833	48.3198	15.5708	1.99233	0.378707	-2.3953	5.21568e-05	0.000153929	guanine monphosphate synthase	Downregulated
SRP72	6731	61.7092	19.9282	1.68111	0.320236	-2.39221	4.62272e-06	1.64055e-05	signal recognition particle 72kDa	Downregulated
WARS	7453	67.729	20.4781	2.57813	0.491813	-2.39014	8.05452e-07	3.18767e-06	tryptophanyl-tRNA synthetase	Downregulated
RNA45S5	100861532	12029.9	3905.67	90.7262	17.3749	-2.38451	0	0	RNA, 45S pre-ribosomal 5	Downregulated
DROSHA	29102	133.408	43.364	2.49847	0.479044	-2.38281	3.2998e-11	2.43759e-10	drosha, ribonuclease type III	Downregulated
PIP4K2B	8396	105.999	34.534	1.86601	0.358602	-2.3795	4.08306e-09	2.25601e-08	phosphatidylinositol-5-phosphate 4-kinase, type II, beta	Downregulated
PTPN1	5770	95.1136	32.1408	2.76163	0.536387	-2.36417	5.3045e-08	2.53476e-07	protein tyrosine phosphatase, non-receptor type 1	Downregulated
RYBP	23429	76.7916	25.3292	1.65753	0.322496	-2.36168	7.7893e-07	3.0877e-06	RING1 and YY1 binding protein	Downregulated
TET2	54790	83.241	25.9413	0.856387	0.16699	-2.3585	4.49852e-08	2.16826e-07	tet methylcytosine dioxygenase 2	Downregulated
ARFGAP2	84364	82.3855	28.1044	2.82115	0.551903	-2.3538	5.68494e-07	2.33918e-06	ADP-ribosylation factor GTPase activating protein 2	Downregulated
RAD54L	8438	52.6897	20.9507	2.0788	0.411765	-2.33586	0.000297732	0.000777408	RAD54-like (S. cerevisiae)	Downregulated
MRPL15	29088	38.2917	12.8764	2.22425	0.441195	-2.33383	0.00036365	0.000933977	mitochondrial ribosomal protein L15	Downregulated
LOC100507412	100507412	58.2356	19.6446	2.00099	0.398158	-2.3293	1.56724e-05	5.08678e-05	uncharacterized LOC100507412	Downregulated
HSPA9	3313	107.947	36.4407	3.1127	0.619824	-2.32824	7.35852e-09	3.99897e-08	heat shock 70kDa protein 9 (mortalin)	Downregulated
TUBA4A	7277	63.0307	21.3174	3.0798	0.614414	-2.32555	8.55e-06	2.90292e-05	tubulin, alpha 4a	Downregulated
MYO18A	399687	60.2473	20.3793	0.805058	0.160633	-2.32532	1.41279e-05	4.60012e-05	myosin XVIIIA	Downregulated
SEPT10	151011	136.259	46.1841	4.6867	0.937021	-2.32242	7.94944e-11	5.62438e-10	septin 10	Downregulated
COL4A1	1282	137.167	59.785	2.70913	0.543494	-2.3175	1.02288e-07	4.68997e-07	collagen, type IV, alpha 1	Downregulated
CRCP	27297	72.2296	24.1291	2.51854	0.50908	-2.30662	1.90575e-06	7.12502e-06	CGRP receptor component	Downregulated
TMEM132B	114795	61.7672	21.1677	0.570371	0.1153	-2.30651	1.87556e-05	6.05216e-05	transmembrane protein 132B	Downregulated
CRLF1	9244	43.5668	14.9876	2.42563	0.492219	-2.30099	0.000197191	0.000524173	cytokine receptor-like factor 1	Downregulated
WDTC1	23038	42.4581	14.6212	0.889983	0.180806	-2.29934	0.000295524	0.000771972	WD and tetratricopeptide repeats 1	Downregulated
TFE3	7030	38.2073	12.9361	1.11418	0.226791	-2.29655	0.00036365	0.000934173	transcription factor binding to IGHM enhancer 3	Downregulated
OGFOD3	79701	80.3347	27.8511	1.88704	0.385902	-2.28982	6.3322e-07	2.54223e-06	2-oxoglutarate and iron-dependent oxygenase domain containing 3	Downregulated
TRAPPC8	22878	124.052	43.0756	1.99178	0.407966	-2.28754	1.0945e-09	6.55042e-09	trafficking protein particle complex 8	Downregulated
PMEPA1	56937	48.1371	17.2859	1.01713	0.208628	-2.28549	0.000208346	0.00055095	prostate transmembrane protein, androgen induced 1	Downregulated
NISCH	11188	91.7026	26.8687	1.84472	0.378817	-2.28383	3.33992e-09	1.89505e-08	nischarin	Downregulated
ARID5B	84159	146.162	45.2627	1.8541	0.382909	-2.27565	7.4155e-13	6.69475e-12	AT rich interactive domain 5B (MRF1-like)	Downregulated
TADA3	10474	73.5996	29.7035	3.01398	0.623099	-2.27414	2.92674e-05	9.09393e-05	transcriptional adaptor 3	Downregulated
NDRG1	10397	85.1213	29.9586	2.8651	0.594811	-2.26808	3.4597e-07	1.45488e-06	N-myc downstream regulated 1	Downregulated
ZAK	51776	31.8136	8.78428	0.647404	0.135403	-2.25741	0.000312286	0.000813327	sterile alpha motif and leucine zipper containing kinase AZK	Downregulated
SEMA5A	9037	52.9682	18.7966	0.4513	0.0944682	-2.25619	8.51402e-05	0.000245352	sema domain, seven thrombospondin repeats (type 1 and type 1-like), transmembrane domain (TM) and short cytoplasmic domain, (semaphorin) 5A	Downregulated
BCL9	607	78.5639	27.9181	1.28001	0.268307	-2.2542	1.37568e-06	5.22468e-06	B-cell CLL/lymphoma 9	Downregulated
MDN1	23195	121.088	43.0597	0.66917	0.140366	-2.25318	3.3982e-09	1.92722e-08	MDN1, midasin homolog (yeast)	Downregulated
SMU1	55234	68.4326	24.3501	0.973251	0.204277	-2.25229	9.01182e-06	3.05463e-05	smu-1 suppressor of mec-8 and unc-52 homolog (C. elegans)	Downregulated
CHERP	10523	76.7711	27.3245	1.88936	0.396665	-2.2519	2.95302e-06	1.0694e-05	calcium homeostasis endoplasmic reticulum protein	Downregulated
CUL4A	8451	83.0171	29.5692	2.25488	0.473753	-2.25084	7.47044e-07	2.97868e-06	cullin 4A	Downregulated
TNC	3371	56.6038	20.2448	0.663102	0.139896	-2.24488	6.7041e-05	0.000195965	tenascin C	Downregulated
NXPE3	91775	89.1187	31.9039	1.0434	0.220334	-2.24353	2.77092e-07	1.19565e-06	neurexophilin and PC-esterase domain family, member 3	Downregulated
EIF3A	8661	196.915	71.5992	3.7464	0.803525	-2.22109	1.12574e-13	1.12602e-12	eukaryotic translation initiation factor 3, subunit A	Downregulated
WDR90	197335	65.1146	23.6873	1.18591	0.254475	-2.2204	1.4862e-05	4.83014e-05	WD repeat domain 90	Downregulated
SEC63	11231	96.4038	35.2977	1.49605	0.323112	-2.21105	2.51594e-07	1.08831e-06	SEC63 homolog (S. cerevisiae)	Downregulated
RBBP6	5930	94.6108	34.9806	1.41349	0.308274	-2.19698	2.8418e-07	1.22537e-06	retinoblastoma binding protein 6	Downregulated
CHEK1	1111	51.3066	18.6163	1.87705	0.411923	-2.18802	0.000125468	0.000349465	checkpoint kinase 1	Downregulated
PITPNA	5306	90.69	33.927	2.50453	0.552674	-2.18004	6.74226e-07	2.69977e-06	phosphatidylinositol transfer protein, alpha	Downregulated
NUDC	10726	176.635	66.1321	9.89458	2.18519	-2.17888	7.77772e-12	6.2513e-11	nudC nuclear distribution protein	Downregulated
RPL3	6122	316.653	130.577	26.0626	5.82198	-2.1624	2.52578e-17	3.85741e-16	ribosomal protein L3	Downregulated
NCBP1	4686	97.2244	37.0905	1.82353	0.410353	-2.1518	5.8181e-07	2.39076e-06	nuclear cap binding protein subunit 1, 80kDa	Downregulated
CDK2AP1	8099	81.3789	28.5128	5.1395	1.16177	-2.14531	8.36616e-07	3.3078e-06	cyclin-dependent kinase 2 associated protein 1	Downregulated
SLC25A39	51629	72.3933	27.461	4.52095	1.02688	-2.13836	1.30984e-05	4.2843e-05	solute carrier family 25, member 39	Downregulated
TRIM24	8805	50.4399	19.4689	1.30519	0.297166	-2.13492	0.00034139	0.000879575	tripartite motif containing 24	Downregulated
NUPL1	9818	68.5108	26.882	1.60968	0.369455	-2.1233	3.09336e-05	9.5873e-05	nucleoporin like 1	Downregulated
VPS33A	65082	65.3408	25.5753	2.5177	0.581296	-2.11476	5.07844e-05	0.000150386	vacuolar protein sorting 33 homolog A (S. cerevisiae)	Downregulated
ZNF471	57573	61.392	24.056	1.24777	0.288404	-2.11319	0.000119264	0.000332866	zinc finger protein 471	Downregulated
NCS1	23413	79.0317	31.5741	1.60562	0.375353	-2.09681	1.09807e-05	3.64326e-05	neuronal calcium sensor 1	Downregulated
TMEM214	54867	72.0017	28.631	2.48759	0.583482	-2.09199	2.36002e-05	7.36295e-05	transmembrane protein 214	Downregulated
IDS	3423	153.448	61.31	2.65484	0.625697	-2.08509	1.42823e-09	8.49783e-09	iduronate 2-sulfatase	Downregulated
DNAH2	146754	31.4519	5.78343	0.486791	0.114826	-2.08385	1.35486e-05	4.42329e-05	dynein, axonemal, heavy chain 2	Downregulated
ITGA5	3678	130.952	52.5493	3.09992	0.733772	-2.07883	2.70764e-08	1.34919e-07	integrin, alpha 5 (fibronectin receptor, alpha polypeptide)	Downregulated
LETM1	3954	85.8074	34.5946	1.58545	0.377045	-2.07208	7.24722e-06	2.47088e-05	leucine zipper-EF-hand containing transmembrane protein 1	Downregulated
NELFCD	51497	59.9889	24.234	2.62062	0.624474	-2.06919	0.000240804	0.000634178	negative elongation factor complex member C/D	Downregulated
MBD6	114785	93.8302	37.9422	2.24921	0.536496	-2.06778	2.386e-06	8.88251e-06	methyl-CpG binding domain protein 6	Downregulated
GAPVD1	26130	91.3385	38.8415	1.37622	0.328728	-2.06574	8.0934e-06	2.75401e-05	GTPase activating protein and VPS9 domains 1	Downregulated
PTPRJ	5795	110.251	26.7289	1.41533	0.338118	-2.06554	6.85882e-13	6.35155e-12	protein tyrosine phosphatase, receptor type, J	Downregulated
MED25	81857	55.271	22.4635	2.37228	0.568725	-2.06047	0.000321454	0.000835603	mediator complex subunit 25	Downregulated
PPRC1	23082	67.9052	27.4288	1.45907	0.355328	-2.03783	7.80422e-05	0.000226875	peroxisome proliferator-activated receptor gamma, coactivator-related 1	Downregulated
SVIL	6840	180.493	74.5341	2.70704	0.659394	-2.0375	1.69605e-10	1.1501e-09	supervillin	Downregulated
SRM	6723	91.4575	38.0785	7.32582	1.79917	-2.02566	8.0934e-06	2.75324e-05	spermidine synthase	Downregulated
GNAI3	2773	121.376	50.5749	2.58111	0.634403	-2.02452	1.94694e-07	8.49692e-07	guanine nucleotide binding protein (G protein), alpha inhibiting activity polypeptide 3	Downregulated
SLC43A2	124935	66.2579	28.0936	0.844018	0.209232	-2.01217	0.000187453	0.000499914	solute carrier family 43 (amino acid system L transporter), member 2	Downregulated
TOP3A	7156	83.2476	35.1129	2.04325	0.50836	-2.00694	2.4436e-05	7.61788e-05	topoisomerase (DNA) III alpha	Downregulated
BCLAF1	9774	241.554	104.25	3.41944	0.852163	-2.00456	1.71564e-12	1.49589e-11	BCL2-associated transcription factor 1	Downregulated
EHMT2	10919	61.9734	26.2168	1.6057	0.400678	-2.00269	0.000353586	0.000909083	euchromatic histone-lysine N-methyltransferase 2	Downregulated
PC	5091	61.3656	26.1336	1.56616	0.393429	-1.99306	0.000353586	0.000908892	pyruvate carboxylase	Downregulated
CNDP2	55748	62.3231	26.6106	1.26746	0.319224	-1.9893	0.000252688	0.000664617	CNDP dipeptidase 2 (metallopeptidase M20 family)	Downregulated
DNAJC13	23317	117.796	50.3165	1.57301	0.39634	-1.98872	7.28274e-07	2.90479e-06	DnaJ (Hsp40) homolog, subfamily C, member 13	Downregulated
CARD10	29775	275.524	118.381	7.11671	1.80368	-1.98027	3.40274e-14	3.62278e-13	caspase recruitment domain family, member 10	Downregulated
TRIM44	54765	120.947	52.1993	2.00695	0.510928	-1.97381	7.49796e-07	2.98868e-06	tripartite motif containing 44	Downregulated
MCM5	4174	76.2229	32.9186	3.00609	0.765798	-1.97285	5.30472e-05	0.000156405	minichromosome maintenance complex component 5	Downregulated
ABCD3	5825	64.9688	7.52807	1.81614	0.470265	-1.94933	2.51036e-12	2.15806e-11	ATP-binding cassette, sub-family D (ALD), member 3	Downregulated
SEL1L	6400	46.6522	84.6899	2.83083	0.735424	-1.94458	0.00032286	0.000839079	sel-1 suppressor of lin-12-like (C. elegans)	Downregulated
AHCTF1P1	285116	95.9312	42.3027	1.09438	0.284663	-1.94279	1.64558e-05	5.33822e-05	AT hook containing transcription factor 1 pseudogene 1	Downregulated
FASN	2194	78.8717	34.8555	0.937502	0.244387	-1.93965	7.59632e-05	0.000221041	fatty acid synthase	Downregulated
SLC25A5	292	64.8237	28.814	4.88882	1.28183	-1.93128	0.000362608	0.000931692	solute carrier family 25 (mitochondrial carrier; adenine nucleotide translocator), member 5	Downregulated
EIF4G2	1982	469.172	208.656	12.1217	3.18199	-1.92959	9.73664e-22	2.28615e-20	eukaryotic translation initiation factor 4 gamma, 2	Downregulated
METAP2	10988	79.4987	35.4911	2.29237	0.603673	-1.925	9.00046e-05	0.000254044	methionyl aminopeptidase 2	Downregulated
MBD3	53615	80.8205	35.1741	3.29738	0.869751	-1.92265	6.52984e-05	0.000191604	methyl-CpG binding domain protein 3	Downregulated
XIAP	331	278.006	124.448	3.32572	0.87816	-1.92111	2.37426e-13	2.29418e-12	X-linked inhibitor of apoptosis, E3 ubiquitin protein ligase	Downregulated
RDX	5962	79.3622	24.8928	1.94456	0.513509	-1.92098	1.11615e-07	5.06448e-07	radixin	Downregulated
FKBP10	60681	208.898	93.5966	7.32029	1.93468	-1.91981	2.66804e-10	1.73515e-09	FK506 binding protein 10, 65 kDa	Downregulated
CSNK1D	1453	72.2432	32.927	2.04391	0.549507	-1.89512	0.000196143	0.000521498	casein kinase 1, delta	Downregulated
ATL3	25923	143.68	65.625	2.02481	0.545525	-1.89207	2.74584e-07	1.18525e-06	atlastin GTPase 3	Downregulated
TMCO1	54499	75.9063	34.8406	1.75194	0.474331	-1.88499	0.000197598	0.000525138	transmembrane and coiled-coil domains 1	Downregulated
GLG1	2734	118.066	54.733	1.43979	0.390446	-1.88266	3.63164e-06	1.29938e-05	golgi glycoprotein 1	Downregulated
ECE1	1889	149.952	69.6236	2.96506	0.812067	-1.86839	2.74388e-07	1.18482e-06	endothelin converting enzyme 1	Downregulated
INTS3	65123	75.2962	35.4452	1.67558	0.46527	-1.84852	0.000313556	0.00081646	integrator complex subunit 3	Downregulated
PYCRL	65263	75.2734	35.5208	2.84593	0.792173	-1.84501	0.000313556	0.000816287	pyrroline-5-carboxylate reductase-like	Downregulated
ZZEF1	23140	108.102	51.1659	0.954436	0.26647	-1.84068	1.91804e-05	6.18597e-05	zinc finger, ZZ-type with EF-hand domain 1	Downregulated
FTH1	2495	125.232	60.0252	10.2599	2.9008	-1.82249	6.38866e-06	2.18608e-05	ferritin, heavy polypeptide 1	Downregulated
DUSP1	1843	76.397	36.7586	3.79933	1.07832	-1.81696	0.000362426	0.00093142	dual specificity phosphatase 1	Downregulated
TRPS1	7227	166.392	80.1079	1.76267	0.500578	-1.8161	2.21114e-07	9.5884e-07	trichorhinophalangeal syndrome I	Downregulated
RPS4X	6191	209.893	101.129	22.4884	6.39133	-1.81499	6.74618e-09	3.68584e-08	ribosomal protein S4, X-linked	Downregulated
RBBP4	5928	156.538	76.3701	2.01237	0.579117	-1.79697	7.21934e-07	2.88232e-06	retinoblastoma binding protein 4	Downregulated
MED12	9968	84.4681	41.4555	1.21958	0.353067	-1.78837	0.000296308	0.000773855	mediator complex subunit 12	Downregulated
THADA	63892	102.243	25.8479	1.7355	0.503097	-1.78644	1.0835e-11	8.59563e-11	thyroid adenoma associated	Downregulated
ATP5A1	498	190.4	93.499	10.3402	3.00905	-1.78089	5.32672e-08	2.54439e-07	ATP synthase, H+ transporting, mitochondrial F1 complex, alpha subunit 1, cardiac muscle	Downregulated
MYLK	4638	113.442	57.9308	1.52683	0.447526	-1.7705	5.56364e-05	0.000163882	myosin light chain kinase	Downregulated
ZNF687	57592	99.297	49.3847	1.85583	0.544442	-1.76921	0.000111682	0.000312777	zinc finger protein 687	Downregulated
CCT7	10574	217.679	108.19	11.6613	3.43505	-1.76333	1.23577e-08	6.51324e-08	chaperonin containing TCP1, subunit 7 (eta)	Downregulated
VPS41	27072	109.229	54.7277	2.28846	0.676344	-1.75855	5.0979e-05	0.000150926	vacuolar protein sorting 41 homolog (S. cerevisiae)	Downregulated
KIAA1462	57608	105.135	52.7878	1.13942	0.337464	-1.75549	6.9733e-05	0.000203299	KIAA1462	Downregulated
H3F3AP4	440926	99.3685	50.1862	9.59418	2.85825	-1.74703	0.000166995	0.000458656	H3 histone, family 3A, pseudogene 4	Downregulated
WDR1	9948	141.322	80.6684	4.98003	1.52315	-1.7091	0.000151711	0.000420073	WD repeat domain 1	Downregulated
ARHGEF11	9826	100.621	52.3163	1.49596	0.458801	-1.70513	0.000275532	0.000722526	Rho guanine nucleotide exchange factor (GEF) 11	Downregulated
FOXP1	27086	25.5252	95.6629	2.79131	0.857566	-1.70262	1.0393e-11	8.26103e-11	forkhead box P1	Downregulated
DHX30	22907	117.134	58.0671	2.8834	0.88987	-1.6961	2.7289e-05	8.48783e-05	DEAH (Asp-Glu-Ala-His) box helicase 30	Downregulated
HMGB2	3148	97.0821	49.9156	6.57686	2.0614	-1.67378	0.000195514	0.000519939	high mobility group box 2	Downregulated
SLC22A23	63027	91.5509	22.1113	2.12499	0.669534	-1.66623	1.07364e-10	7.51361e-10	solute carrier family 22, member 23	Downregulated
ZNF738	148203	141.849	76.9687	1.21797	0.389835	-1.64354	4.00822e-05	0.000123105	zinc finger protein 738	Downregulated
DHX9	1660	251.229	136.701	5.58448	1.79242	-1.63951	5.19202e-08	2.49662e-07	DEAH (Asp-Glu-Ala-His) box helicase 9	Downregulated
VAC14	55697	139.348	76.0884	4.53701	1.46131	-1.63448	6.59816e-05	0.000193423	Vac14 homolog (S. cerevisiae)	Downregulated
PTMA	5757	125.437	69.4402	10.4902	3.42277	-1.6158	0.0001937	0.000515563	prothymosin, alpha	Downregulated
HNRNPUL1	11100	162.033	93.6468	4.64558	1.53065	-1.60171	6.81346e-05	0.000198924	heterogeneous nuclear ribonucleoprotein U-like 1	Downregulated
DFFA	1676	247.886	143.534	7.35445	2.51195	-1.54981	1.22641e-06	4.67374e-06	DNA fragmentation factor, 45kDa, alpha polypeptide	Downregulated
PCBD2	84105	155.196	90.4929	6.56591	2.25832	-1.53975	0.00013384	0.000372445	pterin-4 alpha-carbinolamine dehydratase/dimerization cofactor of hepatocyte nuclear factor 1 alpha (TCF1) 2	Downregulated
ZNF706	51123	183.003	106.757	6.46007	2.24846	-1.52261	3.05298e-05	9.46455e-05	zinc finger protein 706	Downregulated
-	NM_001012321	162.656	97.3082	14.9856	5.28822	-1.50272	0.000221594	0.000584719	-	Downregulated
NONO	4841	222.139	144.113	7.76805	2.79751	-1.47341	0.000252192	0.000663455	non-POU domain containing, octamer-binding	Downregulated
CUL1	8454	173.642	106.42	5.44393	1.96805	-1.46788	0.000261854	0.000687247	cullin 1	Downregulated
GJC1	10052	358.84	223.17	4.73341	1.73646	-1.44673	3.68468e-07	1.54683e-06	gap junction protein, gamma 1, 45kDa	Downregulated
SERBP1	26135	195.702	122.654	2.94568	1.08608	-1.43947	0.0002037	0.000539481	SERPINE1 mRNA binding protein 1	Downregulated
PDCD6IP	10015	44.2919	112.169	2.87117	1.16004	-1.30746	7.00074e-09	3.82322e-08	programmed cell death 6 interacting protein	Downregulated
RNA18S5	100008588	2931470	2153220	159247	68997	-1.20666	0	0	RNA, 18S ribosomal 5	Downregulated
COX6A1	1337	0	51.5978	0.001	5.31608	12.3761	1.37291e-16	1.90633e-15	cytochrome c oxidase subunit VIa polypeptide 1	Upregulated
CHMP4B	128866	0	119.919	0.001	4.32091	12.0771	1.00208e-37	8.94777e-36	charged multivesicular body protein 4B	Upregulated
PSMB6	5694	0	61.5662	0.001	4.28831	12.0662	1.06979e-19	2.05766e-18	proteasome (prosome, macropain) subunit, beta type, 6	Upregulated
CALU	813	0	347.249	0.001	3.85258	11.9116	1.35102e-108	9.18165e-106	calumenin	Upregulated
IFITM3	10410	0	42.1833	0.001	3.78723	11.8869	8.61294e-14	8.70042e-13	interferon induced transmembrane protein 3	Upregulated
SCARNA7	677767	0	19.3012	0.001	3.65951	11.8374	1.21435e-06	4.70843e-06	small Cajal body-specific RNA 7	Upregulated
TIPRL	261726	0	57.6612	0.001	3.65197	11.8345	1.87342e-18	3.23238e-17	TOR signaling pathway regulator	Upregulated
-	102467081	0	32.023	0.001	3.56548	11.7999	1.10534e-10	7.6307e-10	uncharacterized LOC102467081	Upregulated
SMTN	6525	0	184.692	0.001	3.42469	11.7418	6.26134e-58	1.59573e-55	smoothelin	Upregulated
HMGN1	3150	0	73.9643	0.001	3.38688	11.7257	1.99198e-23	5.66695e-22	high mobility group nucleosome binding domain 1	Upregulated
TM9SF1	10548	0	134.348	0.001	3.29489	11.686	2.17964e-42	2.5638e-40	transmembrane 9 superfamily member 1	Upregulated
DDX39A	10212	0	82.2189	0.001	3.27768	11.6785	3.17524e-26	1.21764e-24	DEAD (Asp-Glu-Ala-Asp) box polypeptide 39A	Upregulated
PPARG	5468	0	91.7501	0.001	3.02326	11.5619	5.06134e-29	2.39055e-27	peroxisome proliferator-activated receptor gamma	Upregulated
BTF3	689	0	50.1516	0.001	2.95573	11.5293	2.8085e-16	3.7589e-15	basic transcription factor 3	Upregulated
PTPRA	5786	0	157.104	0.001	2.9466	11.5248	1.54595e-49	2.66361e-47	protein tyrosine phosphatase, receptor type, A	Upregulated
SPRY2	10253	0	102.495	0.001	2.88409	11.4939	1.92791e-32	1.20327e-30	sprouty homolog 2 (Drosophila)	Upregulated
CUEDC2	79004	0	57.096	0.001	2.85696	11.4803	1.87342e-18	3.22782e-17	CUE domain containing 2	Upregulated
RPL23A	6147	0	45.1104	0.001	2.78282	11.4423	1.00612e-14	1.14067e-13	ribosomal protein L23a	Upregulated
ATP6V0C	527	0	46.749	0.001	2.76326	11.4322	4.91828e-15	5.76849e-14	ATPase, H+ transporting, lysosomal 16kDa, V0 subunit c	Upregulated
CIB1	10519	0	43.3825	0.001	2.68774	11.3922	4.21034e-14	4.41346e-13	calcium and integrin binding 1 (calmyrin)	Upregulated
SERF2-C15ORF63	100529067	0	78.3956	0.001	2.6181	11.3543	5.56048e-25	1.85344e-23	SERF2-C15orf63 readthrough	Upregulated
NDUFA7	4701	0	24.7573	0.001	2.58665	11.3369	3.38976e-08	1.6734e-07	NADH dehydrogenase (ubiquinone) 1 alpha subcomplex, 7, 14.5kDa	Upregulated
VPS18	57617	0	165.687	0.001	2.51797	11.298	5.04104e-52	9.34349e-50	vacuolar protein sorting 18 homolog (S. cerevisiae)	Upregulated
PTOV1	53635	0	61.6515	0.001	2.49007	11.282	1.06979e-19	2.03843e-18	prostate tumor overexpressed 1	Upregulated
TNFAIP3	7128	0	195.927	0.001	2.48022	11.2763	2.385e-61	6.63084e-59	tumor necrosis factor, alpha-induced protein 3	Upregulated
CDK2AP2	10263	0	58.7741	0.001	2.39964	11.2286	9.158e-19	1.64026e-17	cyclin-dependent kinase 2 associated protein 2	Upregulated
CDK1	983	0	70.081	0.001	2.39709	11.2271	1.70525e-22	4.35497e-21	cyclin-dependent kinase 1	Upregulated
MORC4	79710	0	154.446	0.001	2.3931	11.2247	1.32342e-48	2.07557e-46	MORC family CW-type zinc finger 4	Upregulated
SKA1	220134	0	116.449	0.001	2.39209	11.2241	8.5784e-37	7.09051e-35	spindle and kinetochore associated complex subunit 1	Upregulated
FDFT1	2222	0	79.7839	0.001	2.32838	11.1851	2.71818e-25	9.34031e-24	farnesyl-diphosphate farnesyltransferase 1	Upregulated
DERL1	79139	0	126.089	0.001	2.2904	11.1614	6.6844e-40	6.87145e-38	derlin 1	Upregulated
COX4I1	1327	0	31.1331	0.001	2.24768	11.1342	2.26114e-10	1.48873e-09	cytochrome c oxidase subunit IV isoform 1	Upregulated
SSNA1	8636	0	34.9838	0.001	2.2157	11.1135	2.64136e-11	1.98964e-10	Sjogren syndrome nuclear autoantigen 1	Upregulated
GADD45B	4616	0	51.069	0.001	2.20253	11.1049	1.37291e-16	1.91503e-15	growth arrest and DNA-damage-inducible, beta	Upregulated
MAPK1IP1L	93487	0	238.198	0.001	2.19092	11.0973	1.02709e-74	4.48729e-72	mitogen-activated protein kinase 1 interacting protein 1-like	Upregulated
PPP2R5C	5527	0	75.5674	0.001	2.1856	11.0938	4.7601e-24	1.44852e-22	protein phosphatase 2, regulatory subunit B', gamma	Upregulated
SMC4	10051	0	194.565	0.001	2.17298	11.0855	4.87892e-61	1.32631e-58	structural maintenance of chromosomes 4	Upregulated
RBBP7	5931	0	71.5279	0.001	2.13069	11.0571	8.33592e-23	2.18358e-21	retinoblastoma binding protein 7	Upregulated
CPSF4	10898	0	62.1383	0.001	2.12296	11.0519	5.22954e-20	1.04874e-18	cleavage and polyadenylation specific factor 4, 30kDa	Upregulated
CDK11A	728642	0	93.686	0.001	2.119	11.0492	1.20948e-29	5.82501e-28	cyclin-dependent kinase 11A	Upregulated
SUCO	51430	0	162.065	0.001	2.0539	11.0041	4.31542e-51	7.87918e-49	SUN domain containing ossification factor	Upregulated
NAA35	60560	0	90.7212	0.001	2.03933	10.9939	1.03538e-28	4.83428e-27	N(alpha)-acetyltransferase 35, NatC auxiliary subunit	Upregulated
MSH6	2956	0	142.645	0.001	2.03492	10.9908	7.10742e-45	9.45055e-43	mutS homolog 6	Upregulated
KDELR2	11014	0	97.8254	0.001	2.032	10.9887	6.90652e-31	3.68941e-29	KDEL (Lys-Asp-Glu-Leu) endoplasmic reticulum protein retention receptor 2	Upregulated
SMOX	54498	0	71.3264	0.001	2.00781	10.9714	8.33592e-23	2.20721e-21	spermine oxidase	Upregulated
CELF1	10658	0	182.659	0.001	2.00723	10.971	2.6202e-57	6.04772e-55	CUGBP, Elav-like family member 1	Upregulated
PPP1R37	284352	0	97.9505	0.001	1.98053	10.9517	6.90652e-31	3.70559e-29	protein phosphatase 1, regulatory subunit 37	Upregulated
LCAT	3931	0	44.5015	0.001	1.97527	10.9478	2.05818e-14	2.22222e-13	lecithin-cholesterol acyltransferase	Upregulated
E2F1	1869	0	89.7636	0.001	1.96932	10.9435	2.11804e-28	9.4562e-27	E2F transcription factor 1	Upregulated
BCL2L2-PABPN1	100529063	0	70.0072	0.001	1.96619	10.9412	1.70525e-22	4.39165e-21	BCL2L2-PABPN1 readthrough	Upregulated
FLJ43663	378805	0	50.0737	0.001	1.96468	10.9401	2.8085e-16	3.77128e-15	long intergenic non-protein coding RNA, p53 induced transcript	Upregulated
CALM1	801	0	140.381	0.001	1.95975	10.9365	2.97426e-44	3.79001e-42	calmodulin 1 (phosphorylase kinase, delta)	Upregulated
TAGLN	6876	0	37.6543	0.001	1.92637	10.9117	3.08548e-12	2.61209e-11	transgelin	Upregulated
TMBIM1	64114	0	75.8732	0.001	1.90953	10.899	4.7601e-24	1.43072e-22	transmembrane BAX inhibitor motif containing 1	Upregulated
TNFAIP8L2-SCNM1	100534012	0	61.4776	0.001	1.88937	10.8837	1.06979e-19	2.0609e-18	TNFAIP8L2-SCNM1 readthrough	Upregulated
ARL6IP1	23204	0	71.9656	0.001	1.88722	10.882	8.33592e-23	2.19297e-21	ADP-ribosylation factor-like 6 interacting protein 1	Upregulated
ZNF511	118472	0	33.2883	0.001	1.87784	10.8749	5.40332e-11	3.89045e-10	zinc finger protein 511	Upregulated
PREPL	9581	0	182.182	0.001	1.87603	10.8735	2.6202e-57	6.16402e-55	prolyl endopeptidase-like	Upregulated
DNMT1	1786	0	170.636	0.001	1.87248	10.8707	1.40718e-53	2.77645e-51	DNA (cytosine-5-)-methyltransferase 1	Upregulated
MRPL53	116540	0	20.5372	0.001	1.85789	10.8594	5.93618e-07	2.41574e-06	mitochondrial ribosomal protein L53	Upregulated
CHCHD10	400916	0	20.7976	0.001	1.84451	10.849	5.93618e-07	2.43274e-06	coiled-coil-helix-coiled-coil-helix domain containing 10	Upregulated
PLEKHG4	25894	0	145.263	0.001	1.84208	10.8471	8.3025e-46	1.14117e-43	pleckstrin homology domain containing, family G (with RhoGef domain) member 4	Upregulated
SNX3	8724	0	54.4905	0.001	1.83734	10.8434	1.60376e-17	2.50879e-16	sorting nexin 3	Upregulated
CDC42EP3	10602	0	158.114	0.001	1.83734	10.8434	7.5572e-50	1.32067e-47	CDC42 effector protein (Rho GTPase binding) 3	Upregulated
DPF2	5977	0	78.179	0.001	1.83525	10.8418	5.56048e-25	1.8434e-23	D4, zinc and double PHD fingers family 2	Upregulated
RPL36A-HNRNPH2	100529097	0	81.3636	0.001	1.8276	10.8357	6.49546e-26	2.37901e-24	RPL36A-HNRNPH2 readthrough	Upregulated
PCGF5	84333	0	221.86	0.001	1.82737	10.8356	1.97603e-69	7.3251e-67	polycomb group ring finger 5	Upregulated
DAZAP1	26528	0	67.0539	0.001	1.81042	10.8221	1.45979e-21	3.3567e-20	DAZ associated protein 1	Upregulated
MAGED1	9500	0	83.3747	0.001	1.80381	10.8168	1.55218e-26	6.04706e-25	melanoma antigen family D1	Upregulated
CCNB1	891	0	65.6184	0.001	1.80283	10.816	6.10886e-21	1.34648e-19	cyclin B1	Upregulated
RNF20	56254	0	119.963	0.001	1.80004	10.8138	1.00208e-37	9.01356e-36	ring finger protein 20, E3 ubiquitin protein ligase	Upregulated
RASA1	5921	0	113.662	0.001	1.78493	10.8017	7.3436e-36	5.68571e-34	RAS p21 protein activator (GTPase activating protein) 1	Upregulated
UHRF1BP1L	23074	0	128.049	0.001	1.78041	10.798	1.59732e-40	1.68449e-38	UHRF1 binding protein 1-like	Upregulated
ALDH18A1	5832	0	103.077	0.001	1.77152	10.7908	9.42438e-33	5.97349e-31	aldehyde dehydrogenase 18 family, member A1	Upregulated
PPHLN1	51535	0	47.1523	0.001	1.74563	10.7695	2.40424e-15	2.94111e-14	periphilin 1	Upregulated
BRD7	29117	0	67.4856	0.001	1.73362	10.7596	1.45979e-21	3.40145e-20	bromodomain containing 7	Upregulated
EMC3	55831	0	31.8324	0.001	1.73311	10.7591	2.26114e-10	1.49516e-09	ER membrane protein complex subunit 3	Upregulated
THOC6	79228	0	41.5536	0.001	1.7281	10.755	1.76192e-13	1.73121e-12	THO complex 6 homolog (Drosophila)	Upregulated
CSE1L	1434	0	97.3766	0.001	1.72412	10.7516	6.90652e-31	3.67337e-29	CSE1 chromosome segregation 1-like (yeast)	Upregulated
MRPL49	740	0	56.5743	0.001	1.72086	10.7489	3.83238e-18	6.36113e-17	mitochondrial ribosomal protein L49	Upregulated
KHDRBS1	10657	0	79.2274	0.001	1.70357	10.7343	2.71818e-25	9.47336e-24	KH domain containing, RNA binding, signal transduction associated 1	Upregulated
CMAS	55907	0	51.485	0.001	1.70215	10.7331	1.37291e-16	1.93266e-15	cytidine monophosphate N-acetylneuraminic acid synthetase	Upregulated
PLS1	5357	0	105.683	0.001	1.69369	10.726	2.25208e-33	1.51372e-31	plastin 1	Upregulated
KIF7	374654	0	129.514	0.001	1.68626	10.7196	7.80834e-41	8.45305e-39	kinesin family member 7	Upregulated
MIDN	90007	0	107.559	0.001	1.68196	10.7159	5.38164e-34	3.89548e-32	midnolin	Upregulated
WBSCR22	114049	0	32.3438	0.001	1.67673	10.7114	1.10534e-10	7.61351e-10	Williams Beuren syndrome chromosome region 22	Upregulated
CLTA	1211	0	32.1695	0.001	1.67611	10.7109	1.10534e-10	7.70462e-10	clathrin, light chain A	Upregulated
NAPG	8774	0	104.572	0.001	1.67182	10.7072	4.607e-33	3.01377e-31	N-ethylmaleimide-sensitive factor attachment protein, gamma	Upregulated
PSMD6	9861	0	41.4377	0.001	1.66607	10.7022	1.76192e-13	1.72982e-12	proteasome (prosome, macropain) 26S subunit, non-ATPase, 6	Upregulated
MARCH7	64844	0	94.6558	0.001	1.65508	10.6927	5.91238e-30	2.92818e-28	membrane-associated ring finger (C3HC4) 7, E3 ubiquitin protein ligase	Upregulated
TAF10	6881	0	22.5097	0.001	1.63505	10.6751	1.41853e-07	6.31934e-07	TAF10 RNA polymerase II, TATA box binding protein (TBP)-associated factor, 30kDa	Upregulated
MRPL32	64983	0	24.2556	0.001	1.61554	10.6578	3.38976e-08	1.65603e-07	mitochondrial ribosomal protein L32	Upregulated
RHOG	391	0	35.768	0.001	1.61418	10.6566	1.29119e-11	1.01121e-10	ras homolog family member G	Upregulated
RMDN3	55177	0	62.2334	0.001	1.61276	10.6553	5.22954e-20	1.04702e-18	regulator of microtubule dynamics 3	Upregulated
IRF2	3660	0	62.0361	0.001	1.61117	10.6539	5.22954e-20	1.03684e-18	interferon regulatory factor 2	Upregulated
ATAD2	29028	0	150.859	0.001	1.60933	10.6522	2.31758e-47	3.50012e-45	ATPase family, AAA domain containing 2	Upregulated
NPNT	255743	0	121.302	0.001	1.60397	10.6474	2.3946e-38	2.25332e-36	nephronectin	Upregulated
TRIM52	84851	0	60.1734	0.001	1.60349	10.647	2.18842e-19	4.11228e-18	tripartite motif containing 52	Upregulated
FERMT2	10979	0	57.9208	0.001	1.60322	10.6468	1.87342e-18	3.21424e-17	fermitin family member 2	Upregulated
GOLIM4	27333	0	75.9326	0.001	1.59738	10.6415	4.7601e-24	1.44492e-22	golgi integral membrane protein 4	Upregulated
MANF	7873	0	26.2122	0.001	1.59381	10.6383	8.1003e-09	4.35182e-08	mesencephalic astrocyte-derived neurotrophic factor	Upregulated
TCEB1	6921	0	54.9852	0.001	1.58228	10.6278	1.60376e-17	2.52819e-16	transcription elongation factor B (SIII), polypeptide 1 (15kDa, elongin C)	Upregulated
AP3S1	1176	0	34.2028	0.001	1.56617	10.613	2.64136e-11	1.96783e-10	adaptor-related protein complex 3, sigma 1 subunit	Upregulated
MRPS24	64951	0	18.3999	0.001	1.56438	10.6114	2.48414e-06	9.12019e-06	mitochondrial ribosomal protein S24	Upregulated
LAMTOR4	389541	0	15.6154	0.001	1.55485	10.6026	2.12658e-05	6.81185e-05	late endosomal/lysosomal adaptor, MAPK and MTOR activator 4	Upregulated
IGFBP6	3489	0	25.2198	0.001	1.55417	10.6019	1.65705e-08	8.57837e-08	insulin-like growth factor binding protein 6	Upregulated
ERRFI1	54206	0	81.6711	0.001	1.54997	10.598	6.49546e-26	2.40057e-24	ERBB receptor feedback inhibitor 1	Upregulated
RPL36AL	6166	0	15.0102	0.001	1.54918	10.5973	2.12658e-05	6.73775e-05	ribosomal protein L36a-like	Upregulated
LSM12	124801	0	64.6874	0.001	1.54171	10.5903	1.24967e-20	2.68196e-19	LSM12 homolog (S. cerevisiae)	Upregulated
SRSF7	6432	0	62.8991	0.001	1.53232	10.5815	5.22954e-20	1.03852e-18	serine/arginine-rich splicing factor 7	Upregulated
INTS8	55656	0	89.8314	0.001	1.53059	10.5799	2.11804e-28	9.52573e-27	integrator complex subunit 8	Upregulated
SET	6418	0	65.3655	0.001	1.52421	10.5738	6.10886e-21	1.35135e-19	SET nuclear proto-oncogene	Upregulated
-	102288414	0	16.3975	0.001	1.4994	10.5502	1.03955e-05	3.47644e-05	chromosome 11 open reading frame 98	Upregulated
TRA2A	29896	0	46.5493	0.001	1.49403	10.545	4.91828e-15	5.75745e-14	transformer 2 alpha homolog (Drosophila)	Upregulated
PRKACA	5566	0	63.2122	0.001	1.48984	10.5409	2.5564e-20	5.22077e-19	protein kinase, cAMP-dependent, catalytic, alpha	Upregulated
ATP13A3	79572	0	183.155	0.001	1.4754	10.5269	1.28086e-57	3.13375e-55	ATPase type 13A3	Upregulated
TRIP6	7205	0	43.3435	0.001	1.47405	10.5256	4.21034e-14	4.42104e-13	thyroid hormone receptor interactor 6	Upregulated
TSPAN5	10098	0	83.5634	0.001	1.46328	10.515	1.55218e-26	6.10539e-25	tetraspanin 5	Upregulated
MTHFD2	10797	0	56.1289	0.001	1.4552	10.507	3.83238e-18	6.42212e-17	methylenetetrahydrofolate dehydrogenase (NADP+ dependent) 2, methenyltetrahydrofolate cyclohydrolase	Upregulated
SMARCE1	6605	0	58.5416	0.001	1.44275	10.4946	9.158e-19	1.63309e-17	SWI/SNF related, matrix associated, actin dependent regulator of chromatin, subfamily e, member 1	Upregulated
BCAT2	587	0	31.9443	0.001	1.4329	10.4847	2.26114e-10	1.49033e-09	branched chain amino-acid transaminase 2, mitochondrial	Upregulated
ARHGAP29	9411	0	219.233	0.001	1.42908	10.4809	8.2692e-69	2.8902e-66	Rho GTPase activating protein 29	Upregulated
PUM1	9698	0	129.777	0.001	1.4279	10.4797	7.80834e-41	8.3789e-39	pumilio RNA-binding family member 1	Upregulated
SETP18	646817	0	24.5106	0.001	1.42606	10.4778	3.38976e-08	1.66735e-07	SET-like protein	Upregulated
ESRRA	2101	0	54.378	0.001	1.42538	10.4771	1.60376e-17	2.50239e-16	estrogen-related receptor alpha	Upregulated
STX1A	6804	0	50.8915	0.001	1.42393	10.4757	2.8085e-16	3.80048e-15	syntaxin 1A (brain)	Upregulated
ITM2B	9445	0	45.0628	0.001	1.42323	10.475	1.00612e-14	1.13646e-13	integral membrane protein 2B	Upregulated
CSTF3	1479	0	58.3077	0.001	1.42074	10.4724	9.158e-19	1.63547e-17	cleavage stimulation factor, 3' pre-RNA, subunit 3, 77kDa	Upregulated
CTH	1491	0	47.7805	0.001	1.42059	10.4723	2.40424e-15	2.95292e-14	cystathionine gamma-lyase	Upregulated
DNTTIP1	116092	0	30.8729	0.001	1.40935	10.4608	4.62556e-10	2.90624e-09	deoxynucleotidyltransferase, terminal, interacting protein 1	Upregulated
ALKBH3	221120	0	37.1736	0.001	1.40693	10.4583	3.08548e-12	2.6358e-11	alkB, alkylation repair homolog 3 (E. coli)	Upregulated
EGFLAM	133584	0	53.7123	0.001	1.40421	10.4555	3.28074e-17	4.9183e-16	EGF-like, fibronectin type III and laminin G domains	Upregulated
JKAMP	51528	0	56.531	0.001	1.40135	10.4526	3.83238e-18	6.38713e-17	JNK1/MAPK8-associated membrane protein	Upregulated
EBNA1BP2	10969	0	32.481	0.001	1.3968	10.4479	1.10534e-10	7.66096e-10	EBNA1 binding protein 2	Upregulated
CPSF7	79869	0	85.8062	0.001	1.39583	10.4469	3.70914e-27	1.5381e-25	cleavage and polyadenylation specific factor 7, 59kDa	Upregulated
HELLS	3070	0	64.6081	0.001	1.3912	10.4421	1.24967e-20	2.64943e-19	helicase, lymphoid-specific	Upregulated
NDUFA13	51079	0	12.6583	0.001	1.39112	10.442	0.000182047	0.00049074	NADH dehydrogenase (ubiquinone) 1 alpha subcomplex, 13	Upregulated
BTBD6	90135	0	46.2801	0.001	1.38432	10.435	4.91828e-15	5.81307e-14	BTB (POZ) domain containing 6	Upregulated
COPG2	26958	0	72.2729	0.001	1.37161	10.4217	4.07492e-23	1.12779e-21	coatomer protein complex, subunit gamma 2	Upregulated
KLHL20	27252	0	80.4733	0.001	1.36917	10.4191	1.32875e-25	4.79487e-24	kelch-like family member 20	Upregulated
CHMP4A	29082	0	31.2242	0.001	1.36752	10.4173	2.26114e-10	1.50084e-09	charged multivesicular body protein 4A	Upregulated
RPL23AP82	284942	0	34.5045	0.001	1.36238	10.4119	2.64136e-11	1.97384e-10	ribosomal protein L23a pseudogene 82	Upregulated
RUFY1	80230	0	56.5774	0.001	1.36044	10.4099	3.83238e-18	6.43093e-17	RUN and FYVE domain containing 1	Upregulated
NEDD8	4738	0	13.9096	0.001	1.35767	10.4069	8.89914e-05	0.000252641	neural precursor cell expressed, developmentally down-regulated 8	Upregulated
EMC2	9694	0	28.5916	0.001	1.35632	10.4055	1.93568e-09	1.12704e-08	ER membrane protein complex subunit 2	Upregulated
DDX46	9879	0	130.17	0.001	1.35383	10.4028	3.81702e-41	4.20663e-39	DEAD (Asp-Glu-Ala-Asp) box polypeptide 46	Upregulated
ECT2	1894	0	100.262	0.001	1.35075	10.3995	8.06782e-32	4.61185e-30	epithelial cell transforming 2	Upregulated
NR2C2AP	126382	0	29.6376	0.001	1.34777	10.3964	9.46234e-10	5.74741e-09	nuclear receptor 2C2-associated protein	Upregulated
SGTA	6449	0	52.9349	0.001	1.34191	10.3901	6.7113e-17	9.75051e-16	small glutamine-rich tetratricopeptide repeat (TPR)-containing, alpha	Upregulated
HSPH1	10808	0	117.546	0.001	1.33865	10.3866	4.19344e-37	3.56239e-35	heat shock 105kDa/110kDa protein 1	Upregulated
RBM15	64783	0	74.9383	0.001	1.33404	10.3816	9.73756e-24	2.84975e-22	RNA binding motif protein 15	Upregulated
SLC39A8	64116	0	58.3279	0.001	1.32776	10.3748	9.158e-19	1.63071e-17	solute carrier family 39 (zinc transporter), member 8	Upregulated
GPR126	57211	0	152.667	0.001	1.32592	10.3728	5.53818e-48	8.46857e-46	adhesion G protein-coupled receptor G6	Upregulated
MAP7D1	55700	0	77.1464	0.001	1.32472	10.3715	1.13749e-24	3.65221e-23	MAP7 domain containing 1	Upregulated
AIMP1	9255	0	57.3712	0.001	1.31913	10.3654	1.87342e-18	3.25533e-17	aminoacyl tRNA synthetase complex-interacting multifunctional protein 1	Upregulated
ATP6AP2	10159	0	44.9413	0.001	1.31575	10.3617	2.05818e-14	2.22812e-13	ATPase, H+ transporting, lysosomal accessory protein 2	Upregulated
VPS29	51699	0	25.1848	0.001	1.31566	10.3616	1.65705e-08	8.50638e-08	vacuolar protein sorting 29 homolog (S. cerevisiae)	Upregulated
CAND1	55832	0	132.778	0.001	1.31482	10.3606	9.12128e-42	1.04281e-39	cullin-associated and neddylation-dissociated 1	Upregulated
ABI1	10006	0	78.5124	0.001	1.31049	10.3559	5.56048e-25	1.85851e-23	abl-interactor 1	Upregulated
PDS5A	23244	0	90.9359	0.001	1.30697	10.352	1.03538e-28	4.87146e-27	PDS5 cohesin associated factor A	Upregulated
CTNNA1	1495	0	74.5869	0.001	1.30528	10.3501	9.73756e-24	2.83618e-22	catenin (cadherin-associated protein), alpha 1, 102kDa	Upregulated
UBXN1	51035	0	25.7506	0.001	1.30278	10.3474	1.65705e-08	8.43909e-08	UBX domain protein 1	Upregulated
WDR43	23160	0	77.0654	0.001	1.29743	10.3414	1.13749e-24	3.66182e-23	WD repeat domain 43	Upregulated
NDUFS1	4719	0	69.4711	0.001	1.29687	10.3408	3.48836e-22	8.72661e-21	NADH dehydrogenase (ubiquinone) Fe-S protein 1, 75kDa (NADH-coenzyme Q reductase)	Upregulated
GTF3C3	9330	0	40.3113	0.001	1.29662	10.3405	3.6043e-13	3.37865e-12	general transcription factor IIIC, polypeptide 3, 102kDa	Upregulated
RRAGA	10670	0	35.7966	0.001	1.29533	10.3391	1.29119e-11	1.00414e-10	Ras-related GTP binding A	Upregulated
PCNA	5111	0	28.3773	0.001	1.29343	10.337	1.93568e-09	1.12064e-08	proliferating cell nuclear antigen	Upregulated
POLR2I	5438	0	18.8932	0.001	1.29172	10.3351	2.48414e-06	9.09018e-06	polymerase (RNA) II (DNA directed) polypeptide I, 14.5kDa	Upregulated
THOC2	57187	0	121.587	0.001	1.28665	10.3294	2.3946e-38	2.27079e-36	THO complex 2	Upregulated
DNAJB12	54788	0	68.6853	0.001	1.27458	10.3158	7.13604e-22	1.70166e-20	DnaJ (Hsp40) homolog, subfamily B, member 12	Upregulated
PSMD4	5710	0	28.1628	0.001	1.27096	10.3117	1.93568e-09	1.1217e-08	proteasome (prosome, macropain) 26S subunit, non-ATPase, 4	Upregulated
CNOT7	29883	0	54.6398	0.001	1.26959	10.3101	1.60376e-17	2.512e-16	CCR4-NOT transcription complex, subunit 7	Upregulated
ZCCHC17	51538	0	31.5071	0.001	1.2627	10.3023	2.26114e-10	1.50247e-09	zinc finger, CCHC domain containing 17	Upregulated
DDX47	51202	0	35.4339	0.001	1.25767	10.2965	1.29119e-11	1.00799e-10	DEAD (Asp-Glu-Ala-Asp) box polypeptide 47	Upregulated
C6orf62	81688	0	52.568	0.001	1.25741	10.2962	6.7113e-17	9.7159e-16	chromosome 6 open reading frame 62	Upregulated
GSK3A	2931	0	46.205	0.001	1.25608	10.2947	4.91828e-15	5.8187e-14	glycogen synthase kinase 3 alpha	Upregulated
EFEMP2	30008	0	41.2002	0.001	1.25579	10.2944	1.76192e-13	1.71604e-12	EGF containing fibulin-like extracellular matrix protein 2	Upregulated
GTF2H4	2968	0	36.3311	0.001	1.25425	10.2926	6.31186e-12	5.17167e-11	general transcription factor IIH, polypeptide 4, 52kDa	Upregulated
FN3KRP	79672	0	38.5842	0.001	1.2533	10.2915	1.5083e-12	1.33413e-11	fructosamine 3 kinase related protein	Upregulated
WDR77	79084	0	50.857	0.001	1.2518	10.2898	2.8085e-16	3.78374e-15	WD repeat domain 77	Upregulated
SPRR2A	6700	0	14.1821	0.001	1.24686	10.2841	4.35024e-05	0.000131269	small proline-rich protein 2A	Upregulated
TMEM115	11070	0	45.1767	0.001	1.24063	10.2769	1.00612e-14	1.13541e-13	transmembrane protein 115	Upregulated
PHB2	11331	0	27.7931	0.001	1.23983	10.2759	3.95974e-09	2.21894e-08	prohibitin 2	Upregulated
USP5	8078	0	64.9781	0.001	1.23871	10.2746	1.24967e-20	2.67259e-19	ubiquitin specific peptidase 5 (isopeptidase T)	Upregulated
LSM3	27258	0	14.1292	0.001	1.23671	10.2723	4.35024e-05	0.000132281	LSM3 homolog, U6 small nuclear RNA associated (S. cerevisiae)	Upregulated
CCNL1	57018	0	54.2821	0.001	1.23518	10.2705	1.60376e-17	2.52169e-16	cyclin L1	Upregulated
SSU72	29101	0	26.9862	0.001	1.23002	10.2645	8.1003e-09	4.31957e-08	SSU72 RNA polymerase II CTD phosphatase homolog (S. cerevisiae)	Upregulated
RC3H2	54542	0	74.4966	0.001	1.22744	10.2614	9.73756e-24	2.86345e-22	ring finger and CCCH-type domains 2	Upregulated
OCIAD1	54940	0	37.925	0.001	1.22651	10.2603	3.08548e-12	2.62846e-11	OCIA domain containing 1	Upregulated
DENND5A	23258	0	101.763	0.001	1.22547	10.2591	3.94386e-32	2.37661e-30	DENN/MADD domain containing 5A	Upregulated
JAK1	3716	0	103.817	0.001	1.22339	10.2567	9.42438e-33	6.00461e-31	Janus kinase 1	Upregulated
COPS5	10987	0	30.758	0.001	1.22259	10.2557	4.62556e-10	2.95789e-09	COP9 signalosome subunit 5	Upregulated
AATF	26574	0	44.374	0.001	1.22198	10.255	2.05818e-14	2.23802e-13	apoptosis antagonizing transcription factor	Upregulated
LPCAT3	10162	0	46.8851	0.001	1.22035	10.2531	4.91828e-15	5.79069e-14	lysophosphatidylcholine acyltransferase 3	Upregulated
RHOT1	55288	0	69.5641	0.001	1.21994	10.2526	3.48836e-22	8.6734e-21	ras homolog family member T1	Upregulated
KIAA1919	91749	0	80.4135	0.001	1.21956	10.2521	1.32875e-25	4.75281e-24	KIAA1919	Upregulated
MRPS26	64949	0	21.4345	0.001	1.21725	10.2494	2.90184e-07	1.24774e-06	mitochondrial ribosomal protein S26	Upregulated
MAPK3	5595	0	30.9377	0.001	1.21693	10.249	4.62556e-10	2.92275e-09	mitogen-activated protein kinase 3	Upregulated
CEP55	55165	0	54.0878	0.001	1.21631	10.2483	1.60376e-17	2.52494e-16	centrosomal protein 55kDa	Upregulated
QKI	9444	0	225.455	0.001	1.21027	10.2411	1.12838e-70	4.3136e-68	QKI, KH domain containing, RNA binding	Upregulated
SECISBP2	79048	0	71.6275	0.001	1.20916	10.2398	8.33592e-23	2.21681e-21	SECIS binding protein 2	Upregulated
FAM136A	84908	0	36.6947	0.001	1.20511	10.2349	6.31186e-12	5.12702e-11	family with sequence similarity 136, member A	Upregulated
TM9SF3	56889	0	124.115	0.001	1.20294	10.2323	2.79724e-39	2.75957e-37	transmembrane 9 superfamily member 3	Upregulated
PSMA4	5685	0	22.0349	0.001	1.20293	10.2323	1.41853e-07	6.28501e-07	proteasome (prosome, macropain) subunit, alpha type, 4	Upregulated
JMJD6	23210	0	42.7214	0.001	1.20144	10.2305	8.61294e-14	8.68608e-13	jumonji domain containing 6	Upregulated
TRMT1	55621	0	43.4217	0.001	1.20086	10.2299	4.21034e-14	4.39089e-13	tRNA methyltransferase 1 homolog (S. cerevisiae)	Upregulated
DNAJB2	3300	0	39.6474	0.001	1.19983	10.2286	7.37316e-13	6.68118e-12	DnaJ (Hsp40) homolog, subfamily B, member 2	Upregulated
APIP	51074	0	25.6288	0.001	1.19948	10.2282	1.65705e-08	8.57112e-08	APAF1 interacting protein	Upregulated
ACSL4	2182	0	100.963	0.001	1.19307	10.2205	8.06782e-32	4.6335e-30	acyl-CoA synthetase long-chain family member 4	Upregulated
FHOD1	29109	0	77.3094	0.001	1.19229	10.2195	1.13749e-24	3.69096e-23	formin homology 2 domain containing 1	Upregulated
SF3B4	10262	0	39.7742	0.001	1.18971	10.2164	7.37316e-13	6.67129e-12	splicing factor 3b, subunit 4, 49kDa	Upregulated
GNAI1	2770	0	63.5266	0.001	1.18878	10.2153	2.5564e-20	5.31844e-19	guanine nucleotide binding protein (G protein), alpha inhibiting activity polypeptide 1	Upregulated
SRXN1	140809	0	53.7144	0.001	1.18633	10.2123	3.28074e-17	4.87646e-16	sulfiredoxin 1	Upregulated
PARP2	10038	0	36.9384	0.001	1.1862	10.2121	6.31186e-12	5.16821e-11	poly (ADP-ribose) polymerase 2	Upregulated
SUMO1	7341	0	21.2048	0.001	1.18605	10.2119	2.90184e-07	1.23644e-06	small ubiquitin-like modifier 1	Upregulated
EXOC7	23265	0	69.4509	0.001	1.18562	10.2114	3.48836e-22	8.7088e-21	exocyst complex component 7	Upregulated
NPC2	10577	0	18.0121	0.001	1.18244	10.2076	2.48414e-06	9.06848e-06	Niemann-Pick disease, type C2	Upregulated
FNIP1	96459	0	130.536	0.001	1.18197	10.207	3.81702e-41	4.16907e-39	folliculin interacting protein 1	Upregulated
GOLPH3	64083	0	52.8749	0.001	1.18009	10.2047	6.7113e-17	9.70441e-16	golgi phosphoprotein 3 (coat-protein)	Upregulated
FAM216A	29902	0	29.9453	0.001	1.17533	10.1989	9.46234e-10	5.6881e-09	family with sequence similarity 216, member A	Upregulated
PUS1	80324	0	33.422	0.001	1.17508	10.1985	5.40332e-11	3.87222e-10	pseudouridylate synthase 1	Upregulated
FHL3	2275	0	29.0046	0.001	1.17173	10.1944	9.46234e-10	5.76458e-09	four and a half LIM domains 3	Upregulated
VEGFB	7423	0	33.5643	0.001	1.16894	10.191	5.40332e-11	3.87904e-10	vascular endothelial growth factor B	Upregulated
MEF2A	4205	0	113.203	0.001	1.16754	10.1893	7.3436e-36	5.64995e-34	myocyte enhancer factor 2A	Upregulated
SMARCD1	6602	0	64.6531	0.001	1.16586	10.1872	1.24967e-20	2.69141e-19	SWI/SNF related, matrix associated, actin dependent regulator of chromatin, subfamily d, member 1	Upregulated
DPF1	8193	0	45.6271	0.001	1.16162	10.1819	1.00612e-14	1.15675e-13	D4, zinc and double PHD fingers family 1	Upregulated
DYRK3	8444	0	42.831	0.001	1.16064	10.1807	8.61294e-14	8.75828e-13	dual-specificity tyrosine-(Y)-phosphorylation regulated kinase 3	Upregulated
RECQL	5965	0	70.0062	0.001	1.16015	10.1801	1.70525e-22	4.37323e-21	RecQ helicase-like	Upregulated
ADAM10	102	0	98.2012	0.001	1.1579	10.1773	3.37618e-31	1.84379e-29	ADAM metallopeptidase domain 10	Upregulated
LMCD1	29995	0	33.0882	0.001	1.15438	10.1729	5.40332e-11	3.91117e-10	LIM and cysteine-rich domains 1	Upregulated
COG4	25839	0	53.638	0.001	1.15415	10.1726	3.28074e-17	4.90627e-16	component of oligomeric golgi complex 4	Upregulated
CCNC	892	0	44.6521	0.001	1.15012	10.1676	2.05818e-14	2.24001e-13	cyclin C	Upregulated
SVIP	258010	0	26.816	0.001	1.14653	10.1631	8.1003e-09	4.36909e-08	small VCP/p97-interacting protein	Upregulated
SRSF10	10772	0	93.6898	0.001	1.14304	10.1587	1.20948e-29	5.87124e-28	serine/arginine-rich splicing factor 10	Upregulated
ZNF774	342132	0	35.3528	0.001	1.14146	10.1567	1.29119e-11	9.99062e-11	zinc finger protein 774	Upregulated
YAP1	10413	0	99.7588	0.001	1.13478	10.1482	1.65041e-31	9.30388e-30	Yes-associated protein 1	Upregulated
RSF1	51773	0	97.9122	0.001	1.13466	10.148	6.90652e-31	3.65747e-29	remodeling and spacing factor 1	Upregulated
ATP6V1C1	528	0	107.794	0.001	1.12485	10.1355	5.38164e-34	3.87256e-32	ATPase, H+ transporting, lysosomal 42kDa, V1 subunit C1	Upregulated
CAV1	857	0	49.7536	0.001	1.12267	10.1327	5.74526e-16	7.51677e-15	caveolin 1, caveolae protein, 22kDa	Upregulated
TGFB1I1	7041	0	33.3814	0.001	1.12239	10.1324	5.40332e-11	3.90655e-10	transforming growth factor beta 1 induced transcript 1	Upregulated
MPV17	4358	0	19.509	0.001	1.11969	10.1289	1.21435e-06	4.73998e-06	MpV17 mitochondrial inner membrane protein	Upregulated
ZNF280C	55609	0	88.2066	0.001	1.11898	10.128	4.3328e-28	1.88623e-26	zinc finger protein 280C	Upregulated
PRDM2	7799	0	116.628	0.001	1.11831	10.1271	8.5784e-37	7.13875e-35	PR domain containing 2, with ZNF domain	Upregulated
TXNDC15	79770	0	68.7976	0.001	1.11187	10.1188	7.13604e-22	1.71167e-20	thioredoxin domain containing 15	Upregulated
LOC101060301	101060301	0	17.0615	0.001	1.11143	10.1182	5.08172e-06	1.78378e-05	heterogeneous nuclear ribonucleoprotein C-like 4	Upregulated
PIGT	51604	0	38.1175	0.001	1.11121	10.1179	1.5083e-12	1.33317e-11	phosphatidylinositol glycan anchor biosynthesis, class T	Upregulated
NDUFS8	4728	0	15.0948	0.001	1.11004	10.1164	2.12658e-05	6.77813e-05	NADH dehydrogenase (ubiquinone) Fe-S protein 8, 23kDa (NADH-coenzyme Q reductase)	Upregulated
MCCC1	56922	0	42.9005	0.001	1.10812	10.1139	8.61294e-14	8.73649e-13	methylcrotonoyl-CoA carboxylase 1 (alpha)	Upregulated
BRI3	25798	0	14.7558	0.001	1.10566	10.1107	4.35024e-05	0.000130529	brain protein I3	Upregulated
MST4	51765	0	53.2255	0.001	1.1052	10.1101	3.28074e-17	4.94252e-16	serine/threonine protein kinase 26	Upregulated
PSMA1	5682	0	18.0533	0.001	1.1047	10.1094	2.48414e-06	9.19748e-06	proteasome (prosome, macropain) subunit, alpha type, 1	Upregulated
ITSN1	6453	0	101.099	0.001	1.1041	10.1087	3.94386e-32	2.38838e-30	intersectin 1 (SH3 domain protein)	Upregulated
MDH1B	130752	0	47.2218	0.001	1.10151	10.1053	2.40424e-15	2.92357e-14	malate dehydrogenase 1B, NAD (soluble)	Upregulated
AP1M1	8907	0	43.6663	0.001	1.0999	10.1032	4.21034e-14	4.39463e-13	adaptor-related protein complex 1, mu 1 subunit	Upregulated
DCAF8	50717	0	44.3214	0.001	1.09962	10.1028	2.05818e-14	2.23603e-13	DDB1 and CUL4 associated factor 8	Upregulated
C11orf91	100131378	0	16.3846	0.001	1.09745	10.0999	1.03955e-05	3.4831e-05	chromosome 11 open reading frame 91	Upregulated
COQ9	57017	0	31.0319	0.001	1.09488	10.0966	2.26114e-10	1.49597e-09	coenzyme Q9	Upregulated
ACAA1	30	0	28.4181	0.001	1.09227	10.0931	1.93568e-09	1.13351e-08	acetyl-CoA acyltransferase 1	Upregulated
ZBTB18	10472	0	79.1201	0.001	1.09144	10.092	2.71818e-25	9.39308e-24	zinc finger and BTB domain containing 18	Upregulated
-	101978719	0	20.393	0.001	1.08833	10.0879	5.93618e-07	2.42219e-06	long intergenic non-protein coding RNA 970	Upregulated
G3BP2	9908	0	77.9959	0.001	1.08705	10.0862	1.13749e-24	3.68119e-23	GTPase activating protein (SH3 domain) binding protein 2	Upregulated
GPR183	1880	0	32.6498	0.001	1.0861	10.0849	1.10534e-10	7.66531e-10	G protein-coupled receptor 183	Upregulated
ZC3HC1	51530	0	32.3146	0.001	1.08161	10.079	1.10534e-10	7.72222e-10	zinc finger, C3HC-type containing 1	Upregulated
PTTG1IP	754	0	51.4893	0.001	1.08125	10.0785	1.37291e-16	1.9238e-15	pituitary tumor-transforming 1 interacting protein	Upregulated
KDSR	2531	0	94.2774	0.001	1.07988	10.0767	5.91238e-30	2.91638e-28	3-ketodihydrosphingosine reductase	Upregulated
RNF215	200312	0	34.6328	0.001	1.07889	10.0753	2.64136e-11	1.98475e-10	ring finger protein 215	Upregulated
TAF9	6880	0	22.2561	0.001	1.07556	10.0709	1.41853e-07	6.38914e-07	TAF9 RNA polymerase II, TATA box binding protein (TBP)-associated factor, 32kDa	Upregulated
FGD5-AS1	100505641	0	65.1158	0.001	1.07071	10.0644	6.10886e-21	1.3538e-19	FGD5 antisense RNA 1	Upregulated
ZDHHC8	29801	0	62.9689	0.001	1.07039	10.0639	5.22954e-20	1.03516e-18	zinc finger, DHHC-type containing 8	Upregulated
EVA1B	55194	0	17.6556	0.001	1.06589	10.0578	5.08172e-06	1.77461e-05	eva-1 homolog B (C. elegans)	Upregulated
MANEAL	149175	0	46.2253	0.001	1.06462	10.0561	4.91828e-15	5.80186e-14	mannosidase, endo-alpha-like	Upregulated
OSBPL11	114885	0	83.0864	0.001	1.06404	10.0553	1.55218e-26	6.06638e-25	oxysterol binding protein-like 11	Upregulated
ZNF410	57862	0	48.2929	0.001	1.06161	10.052	1.17529e-15	1.49452e-14	zinc finger protein 410	Upregulated
NDUFS7	374291	0	13.8919	0.001	1.05424	10.042	8.89914e-05	0.000251649	NADH dehydrogenase (ubiquinone) Fe-S protein 7, 20kDa (NADH-coenzyme Q reductase)	Upregulated
NR2F2	7026	0	67.7041	0.001	1.05396	10.0416	1.45979e-21	3.36302e-20	nuclear receptor subfamily 2, group F, member 2	Upregulated
MRPS11	64963	0	26.352	0.001	1.05381	10.0414	8.1003e-09	4.34038e-08	mitochondrial ribosomal protein S11	Upregulated
FOXRED1	55572	0	36.7439	0.001	1.05341	10.0409	6.31186e-12	5.1441e-11	FAD-dependent oxidoreductase domain containing 1	Upregulated
EZH2	2146	0	47.2009	0.001	1.05148	10.0382	2.40424e-15	2.94996e-14	enhancer of zeste 2 polycomb repressive complex 2 subunit	Upregulated
PSMC1	5700	0	27.7909	0.001	1.05115	10.0378	3.95974e-09	2.2038e-08	proteasome (prosome, macropain) 26S subunit, ATPase, 1	Upregulated
ATP5L	10632	0	23.4711	0.001	1.05044	10.0368	6.93434e-08	3.21805e-07	ATP synthase, H+ transporting, mitochondrial Fo complex, subunit G	Upregulated
ATP5O	539	0	14.0952	0.001	1.04821	10.0337	4.35024e-05	0.000131659	ATP synthase, H+ transporting, mitochondrial F1 complex, O subunit	Upregulated
NCAPD2	9918	0	84.2671	0.001	1.04423	10.0282	7.58764e-27	3.04327e-25	non-SMC condensin I complex, subunit D2	Upregulated
CBFB	865	0	55.0189	0.001	1.04216	10.0254	7.83978e-18	1.26857e-16	core-binding factor, beta subunit	Upregulated
MYEF2	50804	0	93.3846	0.001	1.0421	10.0253	1.20948e-29	5.80216e-28	myelin expression factor 2	Upregulated
TRIP4	9325	0	35.7578	0.001	1.04021	10.0227	1.29119e-11	1.01381e-10	thyroid hormone receptor interactor 4	Upregulated
METTL9	51108	0	56.8202	0.001	1.03839	10.0201	3.83238e-18	6.36977e-17	methyltransferase like 9	Upregulated
PM20D2	135293	0	82.0339	0.001	1.03515	10.0156	3.17524e-26	1.2063e-24	peptidase M20 domain containing 2	Upregulated
PRMT7	54496	0	42.8773	0.001	1.03395	10.014	8.61294e-14	8.83169e-13	protein arginine methyltransferase 7	Upregulated
CCDC61	729440	0	31.6991	0.001	1.03191	10.0111	2.26114e-10	1.50166e-09	coiled-coil domain containing 61	Upregulated
EMC7	56851	0	18.3887	0.001	1.03145	10.0105	2.48414e-06	9.06037e-06	ER membrane protein complex subunit 7	Upregulated
UBIAD1	29914	0	63.6413	0.001	1.0291	10.0072	2.5564e-20	5.26472e-19	UbiA prenyltransferase domain containing 1	Upregulated
IQCJ-SCHIP1	100505385	0	41.0404	0.001	1.02895	10.007	1.76192e-13	1.73679e-12	IQCJ-SCHIP1 readthrough	Upregulated
NRD1	4898	0	66.1843	0.001	1.02846	10.0063	2.98624e-21	6.75244e-20	nardilysin (N-arginine dibasic convertase)	Upregulated
HSD17B12	51144	0	43.9055	0.001	1.02622	10.0031	4.21034e-14	4.39839e-13	hydroxysteroid (17-beta) dehydrogenase 12	Upregulated
PELO	53918	0	50.5243	0.001	1.02543	10.002	2.8085e-16	3.76302e-15	pelota homolog (Drosophila)	Upregulated
ADRA1B	147	0	38.8579	0.001	1.02262	9.99805	1.5083e-12	1.33029e-11	adrenoceptor alpha 1B	Upregulated
TMEM30A	55754	0	76.0014	0.001	1.02066	9.99529	2.32692e-24	7.31754e-23	transmembrane protein 30A	Upregulated
CSTF2T	23283	0	70.6176	0.001	1.01966	9.99387	1.70525e-22	4.3459e-21	cleavage stimulation factor, 3' pre-RNA, subunit 2, 64kDa, tau variant	Upregulated
SLC16A1	6566	0	70.2114	0.001	1.01695	9.99003	1.70525e-22	4.38242e-21	solute carrier family 16 (monocarboxylate transporter), member 1	Upregulated
PPP1R2P3	153743	0	34.0894	0.001	1.0166	9.98954	2.64136e-11	1.97746e-10	protein phosphatase 1, regulatory (inhibitor) subunit 2 pseudogene 3	Upregulated
IGF2BP3	10643	0	71.0514	0.001	1.01579	9.98839	8.33592e-23	2.1977e-21	insulin-like growth factor 2 mRNA binding protein 3	Upregulated
AURKB	9212	0	20.6541	0.001	1.0155	9.98797	5.93618e-07	2.41494e-06	aurora kinase B	Upregulated
TSEN34	79042	0	38.8994	0.001	1.01382	9.98559	1.5083e-12	1.32646e-11	TSEN34 tRNA splicing endonuclease subunit	Upregulated
C19orf43	79002	0	15.8285	0.001	1.01222	9.98331	2.12658e-05	6.78343e-05	chromosome 19 open reading frame 43	Upregulated
RANBP6	26953	0	71.5793	0.001	1.01172	9.9826	8.33592e-23	2.20245e-21	RAN binding protein 6	Upregulated
RNF2	6045	0	60.1565	0.001	1.01018	9.9804	2.18842e-19	4.10597e-18	ring finger protein 2	Upregulated
ATP6AP1	537	0	35.4502	0.001	1.00998	9.98011	1.29119e-11	1.01057e-10	ATPase, H+ transporting, lysosomal accessory protein 1	Upregulated
KBTBD2	25948	0	62.8488	0.001	1.00995	9.98007	5.22954e-20	1.0419e-18	kelch repeat and BTB (POZ) domain containing 2	Upregulated
SEPT7	989	0	74.1833	0.001	1.00903	9.97875	9.73756e-24	2.84295e-22	septin 7	Upregulated
COMMD10	51397	0	24.3739	0.001	1.00519	9.97325	3.38976e-08	1.66067e-07	COMM domain containing 10	Upregulated
FUBP1	8880	0	42.4045	0.001	1.00459	9.97239	8.61294e-14	8.80954e-13	far upstream element (FUSE) binding protein 1	Upregulated
ASCC1	51008	0	49.1638	0.001	1.00331	9.97055	5.74526e-16	7.47678e-15	activating signal cointegrator 1 complex subunit 1	Upregulated
KXD1	79036	0	24.4066	0.001	1.00305	9.97018	3.38976e-08	1.64551e-07	KxDL motif containing 1	Upregulated
PSMD12	5718	0	30.3567	0.001	1.00251	9.9694	4.62556e-10	2.95018e-09	proteasome (prosome, macropain) 26S subunit, non-ATPase, 12	Upregulated
ETFB	2109	0	15.4708	0.001	1.00231	9.96911	2.12658e-05	6.82436e-05	electron-transfer-flavoprotein, beta polypeptide	Upregulated
BTG1	694	0	79.0321	0.001	1.00067	9.96675	2.71818e-25	9.44645e-24	B-cell translocation gene 1, anti-proliferative	Upregulated
UQCC	55245	0	39.8691	0.001	1.00001	9.9658	7.37316e-13	6.7411e-12	ubiquinol-cytochrome c reductase complex assembly factor 1	Upregulated
GLOD4	51031	0	30.9929	0.001	0.996354	9.96051	4.62556e-10	2.96409e-09	glyoxalase domain containing 4	Upregulated
TFAM	7019	0	88.977	0.001	0.995912	9.95987	4.3328e-28	1.89297e-26	transcription factor A, mitochondrial	Upregulated
AACS	65985	0	55.7137	0.001	0.994681	9.95809	7.83978e-18	1.2669e-16	acetoacetyl-CoA synthetase	Upregulated
NXF1	10482	0	39.0001	0.001	0.993754	9.95674	7.37316e-13	6.74614e-12	nuclear RNA export factor 1	Upregulated
TMEM203	94107	0	26.034	0.001	0.99101	9.95276	8.1003e-09	4.348e-08	transmembrane protein 203	Upregulated
PCSK5	5125	0	118.874	0.001	0.988148	9.94858	2.04992e-37	1.80408e-35	proprotein convertase subtilisin/kexin type 5	Upregulated
SKP1	6500	0	33.483	0.001	0.988088	9.9485	5.40332e-11	3.92744e-10	S-phase kinase-associated protein 1	Upregulated
SP2	6668	0	51.8053	0.001	0.986959	9.94685	1.37291e-16	1.91721e-15	Sp2 transcription factor	Upregulated
EBPL	84650	0	15.9464	0.001	0.986794	9.94661	2.12658e-05	6.81542e-05	emopamil binding protein-like	Upregulated
CD2AP	23607	0	89.8021	0.001	0.985445	9.94463	2.11804e-28	9.38768e-27	CD2-associated protein	Upregulated
PBK	55872	0	34.6048	0.001	0.984948	9.9439	2.64136e-11	1.99087e-10	PDZ binding kinase	Upregulated
GAS2L1	10634	0	41.9798	0.001	0.984394	9.94309	1.76192e-13	1.7326e-12	growth arrest-specific 2 like 1	Upregulated
PASD1	139135	0	53.3632	0.001	0.979533	9.93595	3.28074e-17	4.95473e-16	PAS domain containing 1	Upregulated
DIS3L	115752	0	62.349	0.001	0.979378	9.93572	5.22954e-20	1.05046e-18	DIS3 like exosome 3'-5' exoribonuclease	Upregulated
CAMLG	819	0	36.9216	0.001	0.979047	9.93523	6.31186e-12	5.18208e-11	calcium modulating ligand	Upregulated
KIF2C	11004	0	45.419	0.001	0.978005	9.9337	1.00612e-14	1.13751e-13	kinesin family member 2C	Upregulated
CCT2	10576	0	32.0306	0.001	0.977299	9.93266	1.10534e-10	7.64364e-10	chaperonin containing TCP1, subunit 2 (beta)	Upregulated
TCF25	22980	0	37.3342	0.001	0.976462	9.93142	3.08548e-12	2.6248e-11	transcription factor 25 (basic helix-loop-helix)	Upregulated
STRAP	11171	0	31.2736	0.001	0.973219	9.92662	2.26114e-10	1.48792e-09	serine/threonine kinase receptor associated protein	Upregulated
NINJ1	4814	0	20.9659	0.001	0.972044	9.92488	5.93618e-07	2.41093e-06	ninjurin 1	Upregulated
FAM92A1	137392	0	33.5056	0.001	0.968525	9.91965	5.40332e-11	3.88588e-10	family with sequence similarity 92, member A1	Upregulated
MVB12A	93343	0	23.5565	0.001	0.967442	9.91803	6.93434e-08	3.2551e-07	multivesicular body subunit 12A	Upregulated
FAM211B	388886	0	19.9361	0.001	0.967379	9.91794	1.21435e-06	4.69355e-06	leucine rich repeat containing 75B	Upregulated
B4GALT3	8703	0	38.2224	0.001	0.965235	9.91474	1.5083e-12	1.32742e-11	UDP-Gal:betaGlcNAc beta 1,4- galactosyltransferase, polypeptide 3	Upregulated
C12orf75	387882	0	22.2128	0.001	0.965018	9.91441	1.41853e-07	6.32625e-07	chromosome 12 open reading frame 75	Upregulated
NT5E	4907	0	63.6945	0.001	0.964517	9.91366	2.5564e-20	5.23826e-19	5'-nucleotidase, ecto (CD73)	Upregulated
USP10	9100	0	42.5403	0.001	0.963866	9.91269	8.61294e-14	8.79483e-13	ubiquitin specific peptidase 10	Upregulated
TARBP2	6895	0	23.1203	0.001	0.958818	9.90511	6.93434e-08	3.2377e-07	TAR (HIV-1) RNA binding protein 2	Upregulated
GFPT1	2673	0	139.248	0.001	0.957329	9.90287	6.08436e-44	7.5949e-42	glutamine--fructose-6-phosphate transaminase 1	Upregulated
CCSER2	54462	0	69.4946	0.001	0.956792	9.90206	3.48836e-22	8.6558e-21	coiled-coil serine-rich protein 2	Upregulated
POMP	51371	0	23.5013	0.001	0.955259	9.89975	6.93434e-08	3.21561e-07	proteasome maturation protein	Upregulated
ZNF43	7594	0	82.2138	0.001	0.954041	9.89791	3.17524e-26	1.21005e-24	zinc finger protein 43	Upregulated
NSDHL	50814	0	26.2069	0.001	0.953551	9.89717	8.1003e-09	4.38068e-08	NAD(P) dependent steroid dehydrogenase-like	Upregulated
TEAD1	7003	0	150.94	0.001	0.951308	9.89377	2.31758e-47	3.45743e-45	TEA domain family member 1 (SV40 transcriptional enhancer factor)	Upregulated
UBTF	7343	0	75.6191	0.001	0.950497	9.89254	4.7601e-24	1.44134e-22	upstream binding transcription factor, RNA polymerase I	Upregulated
RNF128	79589	0	45.2478	0.001	0.947504	9.88799	1.00612e-14	1.14919e-13	ring finger protein 128, E3 ubiquitin protein ligase	Upregulated
HS3ST1	9957	0	30.9548	0.001	0.943021	9.88115	4.62556e-10	2.95635e-09	heparan sulfate (glucosamine) 3-O-sulfotransferase 1	Upregulated
DEDD2	162989	0	30.5559	0.001	0.941502	9.87882	4.62556e-10	2.9548e-09	death effector domain containing 2	Upregulated
SNX13	23161	0	100.535	0.001	0.93897	9.87494	8.06782e-32	4.65536e-30	sorting nexin 13	Upregulated
LINC00294	283267	0	52.1155	0.001	0.93579	9.87004	6.7113e-17	9.77373e-16	long intergenic non-protein coding RNA 294	Upregulated
GALK2	2585	0	54.2155	0.001	0.934479	9.86802	1.60376e-17	2.48025e-16	galactokinase 2	Upregulated
ZC3H14	79882	0	58.4661	0.001	0.932705	9.86528	9.158e-19	1.63786e-17	zinc finger CCCH-type containing 14	Upregulated
MRPS10	55173	0	33.6937	0.001	0.930023	9.86112	5.40332e-11	3.87676e-10	mitochondrial ribosomal protein S10	Upregulated
FKBP15	23307	0	67.513	0.001	0.927656	9.85745	1.45979e-21	3.39499e-20	FK506 binding protein 15, 133kDa	Upregulated
CUL5	8065	0	99.6404	0.001	0.92523	9.85367	1.65041e-31	9.34695e-30	cullin 5	Upregulated
CDC42	998	0	35.6343	0.001	0.923052	9.85027	1.29119e-11	1.00542e-10	cell division cycle 42	Upregulated
NR2F6	2063	0	27.7949	0.001	0.923046	9.85026	3.95974e-09	2.20882e-08	nuclear receptor subfamily 2, group F, member 6	Upregulated
DUSP10	11221	0	25.9659	0.001	0.922169	9.84889	1.65705e-08	8.43207e-08	dual specificity phosphatase 10	Upregulated
ASCC3	10973	0	51.009	0.001	0.91686	9.84056	1.37291e-16	1.9085e-15	activating signal cointegrator 1 complex subunit 3	Upregulated
MFF	56947	0	27.6215	0.001	0.916776	9.84043	3.95974e-09	2.22506e-08	mitochondrial fission factor	Upregulated
NDUFB10	4716	0	11.1633	0.001	0.915034	9.83768	0.000372406	0.000952266	NADH dehydrogenase (ubiquinone) 1 beta subcomplex, 10, 22kDa	Upregulated
STAMBPL1	57559	0	32.0219	0.001	0.914941	9.83753	1.10534e-10	7.66965e-10	STAM binding protein-like 1	Upregulated
LINC00116	205251	0	25.1754	0.001	0.91378	9.8357	1.65705e-08	8.39366e-08	long intergenic non-protein coding RNA 116	Upregulated
IP6K2	51447	0	31.4511	0.001	0.913714	9.8356	2.26114e-10	1.51482e-09	inositol hexakisphosphate kinase 2	Upregulated
ZNF830	91603	0	25.2004	0.001	0.911897	9.83273	1.65705e-08	8.44964e-08	zinc finger protein 830	Upregulated
NCKAP1	10787	0	76.44	0.001	0.910907	9.83116	2.32692e-24	7.35535e-23	NCK-associated protein 1	Upregulated
C16orf80	29105	0	19.785	0.001	0.909478	9.82889	1.21435e-06	4.69652e-06	cilia and flagella associated protein 20	Upregulated
SERINC1	57515	0	47.9119	0.001	0.909282	9.82858	2.40424e-15	2.92939e-14	serine incorporator 1	Upregulated
RYK	6259	0	44.6319	0.001	0.908325	9.82706	2.05818e-14	2.244e-13	receptor-like tyrosine kinase	Upregulated
PCDH9	5101	0	95.0576	0.001	0.907379	9.82556	2.8902e-30	1.47932e-28	protocadherin 9	Upregulated
FAM83G	644815	0	44.4265	0.001	0.905074	9.82189	2.05818e-14	2.242e-13	family with sequence similarity 83, member G	Upregulated
PNKD	25953	0	11.5367	0.001	0.90442	9.82085	0.000372406	0.000955662	paroxysmal nonkinesigenic dyskinesia	Upregulated
ADCY6	112	0	100.042	0.001	0.904199	9.8205	8.06782e-32	4.67742e-30	adenylate cyclase 6	Upregulated
PARK7	11315	0	13.7566	0.001	0.903078	9.81871	8.89914e-05	0.000256209	parkinson protein 7	Upregulated
SH3BGRL	6451	0	31.4935	0.001	0.901581	9.81631	2.26114e-10	1.51399e-09	SH3 domain binding glutamate-rich protein like	Upregulated
TMED1	11018	0	23.7756	0.001	0.89898	9.81214	6.93434e-08	3.27773e-07	transmembrane emp24 protein transport domain containing 1	Upregulated
POP7	10248	0	14.1169	0.001	0.898886	9.81199	4.35024e-05	0.000132248	processing of precursor 7, ribonuclease P/MRP subunit (S. cerevisiae)	Upregulated
SH3BP5L	80851	0	47.938	0.001	0.898854	9.81194	2.40424e-15	2.93231e-14	SH3-binding domain protein 5-like	Upregulated
ZMYND11	10771	0	44.6035	0.001	0.898852	9.81194	2.05818e-14	2.23009e-13	zinc finger, MYND-type containing 11	Upregulated
DLGAP4	22839	0	48.8352	0.001	0.895852	9.80712	1.17529e-15	1.48679e-14	discs, large (Drosophila) homolog-associated protein 4	Upregulated
STRBP	55342	0	96.5971	0.001	0.894451	9.80486	1.41284e-30	7.32343e-29	spermatid perinuclear RNA binding protein	Upregulated
CAPG	822	0	19.5454	0.001	0.894309	9.80463	1.21435e-06	4.68763e-06	capping protein (actin filament), gelsolin-like	Upregulated
CNIH4	29097	0	22.5768	0.001	0.893805	9.80382	1.41853e-07	6.38679e-07	cornichon family AMPA receptor auxiliary protein 4	Upregulated
CXXC1	30827	0	44.3555	0.001	0.893202	9.80284	2.05818e-14	2.25203e-13	CXXC finger protein 1	Upregulated
IVNS1ABP	10625	0	63.0304	0.001	0.893154	9.80277	2.5564e-20	5.24705e-19	influenza virus NS1A binding protein	Upregulated
MCM6	4175	0	56.6712	0.001	0.891135	9.7995	3.83238e-18	6.34391e-17	minichromosome maintenance complex component 6	Upregulated
EPS15	2060	0	68.7149	0.001	0.889608	9.79703	7.13604e-22	1.7218e-20	epidermal growth factor receptor pathway substrate 15	Upregulated
FAM91A1	157769	0	79.8937	0.001	0.889546	9.79693	2.71818e-25	9.41969e-24	family with sequence similarity 91, member A1	Upregulated
PIGW	284098	0	33.5317	0.001	0.889157	9.79629	5.40332e-11	3.88132e-10	phosphatidylinositol glycan anchor biosynthesis, class W	Upregulated
VAPA	9218	0	104.484	0.001	0.888721	9.79559	4.607e-33	2.99774e-31	VAMP (vesicle-associated membrane protein)-associated protein A, 33kDa	Upregulated
MID1IP1	58526	0	32.5165	0.001	0.886962	9.79273	1.10534e-10	7.67836e-10	MID1 interacting protein 1	Upregulated
THG1L	54974	0	19.4385	0.001	0.885322	9.79006	1.21435e-06	4.7174e-06	tRNA-histidine guanylyltransferase 1-like (S. cerevisiae)	Upregulated
NRF1	4899	0	51.0439	0.001	0.884952	9.78946	1.37291e-16	1.93488e-15	nuclear respiratory factor 1	Upregulated
SPOCK2	9806	0	66.1152	0.001	0.884924	9.78941	2.98624e-21	6.72756e-20	sparc/osteonectin, cwcv and kazal-like domains proteoglycan (testican) 2	Upregulated
NDUFV2	4729	0	13.7183	0.001	0.884902	9.78937	8.89914e-05	0.000256028	NADH dehydrogenase (ubiquinone) flavoprotein 2, 24kDa	Upregulated
RAP1B	5908	0	32.1062	0.001	0.884148	9.78814	1.10534e-10	7.6221e-10	RAP1B, member of RAS oncogene family	Upregulated
ATRAID	51374	0	16.4289	0.001	0.883151	9.78652	1.03955e-05	3.46507e-05	all-trans retinoic acid-induced differentiation factor	Upregulated
TPP2	7174	0	69.8064	0.001	0.881602	9.78398	3.48836e-22	8.74449e-21	tripeptidyl peptidase II	Upregulated
RUSC2	9853	0	79.6645	0.001	0.881536	9.78388	2.71818e-25	9.36662e-24	RUN and SH3 domain containing 2	Upregulated
CHMP7	91782	0	50.5004	0.001	0.880676	9.78247	2.8085e-16	3.79629e-15	charged multivesicular body protein 7	Upregulated
LZTS2	84445	0	42.144	0.001	0.880333	9.78191	8.61294e-14	8.74374e-13	leucine zipper, putative tumor suppressor 2	Upregulated
BEGAIN	57596	0	39.5065	0.001	0.877434	9.77715	7.37316e-13	6.79698e-12	brain-enriched guanylate kinase-associated	Upregulated
ZNF655	79027	0	67.8075	0.001	0.87682	9.77614	1.45979e-21	3.38855e-20	zinc finger protein 655	Upregulated
SUCLG2	8801	0	23.1736	0.001	0.876665	9.77588	6.93434e-08	3.28154e-07	succinate-CoA ligase, GDP-forming, beta subunit	Upregulated
PI4K2A	55361	0	61.8443	0.001	0.876555	9.7757	1.06979e-19	2.05443e-18	phosphatidylinositol 4-kinase type 2 alpha	Upregulated
HTATSF1	27336	0	41.38	0.001	0.875316	9.77366	1.76192e-13	1.71741e-12	HIV-1 Tat specific factor 1	Upregulated
DHX32	55760	0	45.0264	0.001	0.875233	9.77352	1.00612e-14	1.1535e-13	DEAH (Asp-Glu-Ala-His) box polypeptide 32	Upregulated
PFDN4	5203	0	20.1143	0.001	0.873849	9.77124	5.93618e-07	2.40853e-06	prefoldin subunit 4	Upregulated
CNOT11	55571	0	37.1417	0.001	0.872246	9.76859	3.08548e-12	2.63213e-11	CCR4-NOT transcription complex, subunit 11	Upregulated
ZFPL1	7542	0	20.3047	0.001	0.871279	9.76699	5.93618e-07	2.42381e-06	zinc finger protein-like 1	Upregulated
LAMA3	3909	0	25.631	0.001	0.87052	9.76573	1.65705e-08	8.45669e-08	laminin, alpha 3	Upregulated
CCNG1	900	0	34.7154	0.001	0.870375	9.76549	2.64136e-11	1.97263e-10	cyclin G1	Upregulated
RNASEH2C	84153	0	40.5255	0.001	0.868851	9.76296	3.6043e-13	3.41794e-12	ribonuclease H2, subunit C	Upregulated
PSMB1	5689	0	13.4786	0.001	0.868498	9.76238	8.89914e-05	0.000251998	proteasome (prosome, macropain) subunit, beta type, 1	Upregulated
SGSH	6448	0	40.2293	0.001	0.867199	9.76022	3.6043e-13	3.37606e-12	N-sulfoglucosamine sulfohydrolase	Upregulated
ITGB4	3691	0	82.8688	0.001	0.866121	9.75842	3.17524e-26	1.20256e-24	integrin, beta 4	Upregulated
GABBR2	9568	0	84.2163	0.001	0.863924	9.75476	7.58764e-27	3.05328e-25	gamma-aminobutyric acid (GABA) B receptor, 2	Upregulated
REPS1	85021	0	57.3089	0.001	0.861845	9.75129	1.87342e-18	3.21876e-17	RALBP1 associated Eps domain containing 1	Upregulated
MKI67IP	84365	0	25.1666	0.001	0.85982	9.74789	1.65705e-08	8.47437e-08	nucleolar protein interacting with the FHA domain of MKI67	Upregulated
CDC25A	993	0	51.8282	0.001	0.859144	9.74676	1.37291e-16	1.9216e-15	cell division cycle 25A	Upregulated
RRM2B	50484	0	68.6251	0.001	0.855757	9.74106	7.13604e-22	1.70832e-20	ribonucleotide reductase M2 B (TP53 inducible)	Upregulated
RUFY3	22902	0	49.8278	0.001	0.855254	9.74021	5.74526e-16	7.50874e-15	RUN and FYVE domain containing 3	Upregulated
OGFR	11054	0	34.5501	0.001	0.85219	9.73503	2.64136e-11	1.99578e-10	opioid growth factor receptor	Upregulated
WDR45	11152	0	27.3075	0.001	0.849351	9.73022	3.95974e-09	2.23223e-08	WD repeat domain 45	Upregulated
USP48	84196	0	52.2357	0.001	0.847711	9.72743	6.7113e-17	9.72741e-16	ubiquitin specific peptidase 48	Upregulated
PLIN3	10226	0	32.6431	0.001	0.847047	9.7263	1.10534e-10	7.69585e-10	perilipin 3	Upregulated
SUMO3	6612	0	25.8864	0.001	0.846871	9.726	1.65705e-08	8.59292e-08	small ubiquitin-like modifier 3	Upregulated
LPP	4026	0	256.822	0.001	0.845991	9.7245	2.6097e-80	1.22786e-77	LIM domain containing preferred translocation partner in lipoma	Upregulated
TRIP11	9321	0	115.27	0.001	0.845676	9.72396	1.75485e-36	1.42166e-34	thyroid hormone receptor interactor 11	Upregulated
FARSB	10056	0	35.089	0.001	0.845452	9.72358	1.29119e-11	1.00863e-10	phenylalanyl-tRNA synthetase, beta subunit	Upregulated
CHUK	1147	0	50.1612	0.001	0.845203	9.72315	2.8085e-16	3.77958e-15	conserved helix-loop-helix ubiquitous kinase	Upregulated
EAF1	85403	0	63.8483	0.001	0.844643	9.7222	2.5564e-20	5.28251e-19	ELL associated factor 1	Upregulated
ANKIB1	54467	0	86.2653	0.001	0.844228	9.72149	1.81317e-27	7.70155e-26	ankyrin repeat and IBR domain containing 1	Upregulated
WDR61	80349	0	17.4276	0.001	0.842545	9.71861	5.08172e-06	1.7802e-05	WD repeat domain 61	Upregulated
VEZT	55591	0	64.7634	0.001	0.84229	9.71817	1.24967e-20	2.66327e-19	vezatin, adherens junctions transmembrane protein	Upregulated
PPP1R3C	5507	0	36.2722	0.001	0.841176	9.71626	6.31186e-12	5.1613e-11	protein phosphatase 1, regulatory subunit 3C	Upregulated
DAZAP2	9802	0	29.2972	0.001	0.840329	9.71481	9.46234e-10	5.73318e-09	DAZ associated protein 2	Upregulated
SYMPK	8189	0	58.9623	0.001	0.838914	9.71238	9.158e-19	1.62362e-17	symplekin	Upregulated
PSMC3IP	29893	0	21.6661	0.001	0.838369	9.71144	2.90184e-07	1.24033e-06	PSMC3 interacting protein	Upregulated
IL15	3600	0	28.1661	0.001	0.837849	9.71055	1.93568e-09	1.12811e-08	interleukin 15	Upregulated
ACP2	53	0	27.5703	0.001	0.837764	9.7104	3.95974e-09	2.21793e-08	acid phosphatase 2, lysosomal	Upregulated
BBS2	583	0	39.4438	0.001	0.836891	9.7089	7.37316e-13	6.78164e-12	Bardet-Biedl syndrome 2	Upregulated
TPRN	286262	0	36.9945	0.001	0.836674	9.70852	6.31186e-12	5.11344e-11	taperin	Upregulated
KPNA3	3839	0	62.8802	0.001	0.836497	9.70822	5.22954e-20	1.05392e-18	karyopherin alpha 3 (importin alpha 4)	Upregulated
PTP4A1	7803	0	71.4521	0.001	0.835365	9.70626	8.33592e-23	2.17892e-21	protein tyrosine phosphatase type IVA, member 1	Upregulated
HS2ST1	9653	0	22.5842	0.001	0.834531	9.70482	1.41853e-07	6.3494e-07	heparan sulfate 2-O-sulfotransferase 1	Upregulated
CLN3	1201	0	25.6229	0.001	0.834113	9.7041	1.65705e-08	8.44612e-08	ceroid-lipofuscinosis, neuronal 3	Upregulated
EML2	24139	0	27.7652	0.001	0.833023	9.70221	3.95974e-09	2.23121e-08	echinoderm microtubule associated protein like 2	Upregulated
JMJD7	100137047	0	19.9583	0.001	0.832925	9.70204	1.21435e-06	4.69949e-06	jumonji domain containing 7	Upregulated
C11orf68	83638	0	21.7661	0.001	0.832821	9.70186	2.90184e-07	1.23129e-06	chromosome 11 open reading frame 68	Upregulated
DPYD	1806	0	62.1522	0.001	0.831847	9.70017	5.22954e-20	1.04531e-18	dihydropyrimidine dehydrogenase	Upregulated
ATF6	22926	0	105.71	0.001	0.831345	9.6993	2.25208e-33	1.52208e-31	activating transcription factor 6	Upregulated
SREK1	140890	0	94.7006	0.001	0.830745	9.69826	5.91238e-30	2.95209e-28	splicing regulatory glutamine/lysine-rich protein 1	Upregulated
HRSP12	10247	0	13.8865	0.001	0.829068	9.69535	8.89914e-05	0.000252466	heat-responsive protein 12	Upregulated
PPP4R2	151987	0	20.5932	0.001	0.826862	9.6915	5.93618e-07	2.39582e-06	protein phosphatase 4, regulatory subunit 2	Upregulated
MIER1	57708	0	77.0713	0.001	0.826567	9.69099	1.13749e-24	3.64265e-23	mesoderm induction early response 1, transcriptional regulator	Upregulated
UNC119	9094	0	19.2308	0.001	0.826394	9.69069	1.21435e-06	4.63353e-06	unc-119 homolog (C. elegans)	Upregulated
USP34	9736	0	157.392	0.001	0.825924	9.68987	1.54595e-49	2.62661e-47	ubiquitin specific peptidase 34	Upregulated
CUL3	8452	0	94.1175	0.001	0.824655	9.68765	5.91238e-30	2.96419e-28	cullin 3	Upregulated
NAA40	79829	0	50.776	0.001	0.822405	9.68371	2.8085e-16	3.82588e-15	N(alpha)-acetyltransferase 40, NatD catalytic subunit	Upregulated
SYNC	81493	0	47.0268	0.001	0.821789	9.68262	2.40424e-15	2.95589e-14	syncoilin, intermediate filament protein	Upregulated
MYO5A	4644	0	168.091	0.001	0.821689	9.68245	5.88868e-53	1.12557e-50	myosin VA (heavy chain 12, myoxin)	Upregulated
FAM208A	23272	0	114.569	0.001	0.821242	9.68166	3.58984e-36	2.81503e-34	family with sequence similarity 208, member A	Upregulated
MRPS7	51081	0	19.5588	0.001	0.820293	9.68	1.21435e-06	4.68172e-06	mitochondrial ribosomal protein S7	Upregulated
BLVRB	645	0	11.8443	0.001	0.820185	9.67981	0.000372406	0.000942222	biliverdin reductase B	Upregulated
OLA1	29789	0	59.8465	0.001	0.818524	9.67688	4.47678e-19	8.18602e-18	Obg-like ATPase 1	Upregulated
GTF2B	2959	0	22.4353	0.001	0.814821	9.67034	1.41853e-07	6.35172e-07	general transcription factor IIB	Upregulated
SIK1	150094	0	64.3587	0.001	0.814535	9.66983	1.24967e-20	2.68668e-19	salt-inducible kinase 1	Upregulated
TMA16	55319	0	26.1094	0.001	0.812938	9.667	8.1003e-09	4.34991e-08	translation machinery associated 16 homolog (S. cerevisiae)	Upregulated
ILVBL	10994	0	31.8837	0.001	0.812073	9.66547	2.26114e-10	1.50903e-09	ilvB (bacterial acetolactate synthase)-like	Upregulated
FMR1	2332	0	55.4862	0.001	0.811038	9.66363	7.83978e-18	1.27532e-16	fragile X mental retardation 1	Upregulated
SNIP1	79753	0	62.6888	0.001	0.810866	9.66332	5.22954e-20	1.04021e-18	Smad nuclear interacting protein 1	Upregulated
INTS5	80789	0	44.8285	0.001	0.810338	9.66238	2.05818e-14	2.246e-13	integrator complex subunit 5	Upregulated
TNFRSF1B	7133	0	49.9909	0.001	0.809468	9.66083	5.74526e-16	7.49273e-15	tumor necrosis factor receptor superfamily, member 1B	Upregulated
WNK4	65266	0	56.9577	0.001	0.809228	9.6604	3.83238e-18	6.41334e-17	WNK lysine deficient protein kinase 4	Upregulated
ATP6AP1L	92270	0	31.7338	0.001	0.808603	9.65929	2.26114e-10	1.49759e-09	ATPase, H+ transporting, lysosomal accessory protein 1-like	Upregulated
PPM1M	132160	0	24.8404	0.001	0.806427	9.6554	3.38976e-08	1.65207e-07	protein phosphatase, Mg2+/Mn2+ dependent, 1M	Upregulated
SLC2A8	29988	0	27.3384	0.001	0.805958	9.65456	3.95974e-09	2.2028e-08	solute carrier family 2 (facilitated glucose transporter), member 8	Upregulated
STOM	2040	0	43.1996	0.001	0.805932	9.65451	4.21034e-14	4.40968e-13	stomatin	Upregulated
LRRTM2	26045	0	76.0877	0.001	0.804743	9.65238	2.32692e-24	7.33639e-23	leucine rich repeat transmembrane neuronal 2	Upregulated
MKKS	8195	0	39.8081	0.001	0.80272	9.64875	7.37316e-13	6.77655e-12	McKusick-Kaufman syndrome	Upregulated
LOC494141	494141	0	23.8959	0.001	0.801998	9.64745	6.93434e-08	3.22907e-07	solute carrier family 25, member 51 pseudogene	Upregulated
SKIV2L2	23517	0	56.7317	0.001	0.80065	9.64503	3.83238e-18	6.35251e-17	superkiller viralicidic activity 2-like 2 (S. cerevisiae)	Upregulated
MAPKAP1	79109	0	22.5821	0.001	0.800365	9.64451	1.41853e-07	6.31015e-07	mitogen-activated protein kinase associated protein 1	Upregulated
DNAJB6	10049	0	20.9024	0.001	0.799775	9.64345	5.93618e-07	2.38716e-06	DnaJ (Hsp40) homolog, subfamily B, member 6	Upregulated
DDX21	9188	0	63.3211	0.001	0.799018	9.64208	2.5564e-20	5.25587e-19	DEAD (Asp-Glu-Ala-Asp) box helicase 21	Upregulated
CBX1	10951	0	30.1052	0.001	0.79901	9.64207	4.62556e-10	2.91222e-09	chromobox homolog 1	Upregulated
ADNP	23394	0	80.3079	0.001	0.798836	9.64176	1.32875e-25	4.78077e-24	activity-dependent neuroprotector homeobox	Upregulated
UBE4A	9354	0	82.1569	0.001	0.798491	9.64113	3.17524e-26	1.22532e-24	ubiquitination factor E4A	Upregulated
LRCH4	4034	0	37.7603	0.001	0.797042	9.63851	3.08548e-12	2.61571e-11	leucine-rich repeats and calponin homology (CH) domain containing 4	Upregulated
FGF18	8817	0	26.5995	0.001	0.796439	9.63742	8.1003e-09	4.37488e-08	fibroblast growth factor 18	Upregulated
EHBP1L1	254102	0	69.2838	0.001	0.793752	9.63254	3.48836e-22	8.62083e-21	EH domain binding protein 1-like 1	Upregulated
PCM1	5108	0	117.097	0.001	0.79228	9.62987	4.19344e-37	3.5873e-35	pericentriolar material 1	Upregulated
P4HA2	8974	0	30.2475	0.001	0.792087	9.62952	4.62556e-10	2.91372e-09	prolyl 4-hydroxylase, alpha polypeptide II	Upregulated
TSKU	25987	0	35.6551	0.001	0.790896	9.62734	1.29119e-11	9.98431e-11	tsukushi, small leucine rich proteoglycan	Upregulated
TMEM51	55092	0	25.6335	0.001	0.79057	9.62675	1.65705e-08	8.58564e-08	transmembrane protein 51	Upregulated
DPY19L4	286148	0	82.6797	0.001	0.789225	9.62429	3.17524e-26	1.22147e-24	dpy-19-like 4 (C. elegans)	Upregulated
ACAT1	38	0	28.3296	0.001	0.788562	9.62308	1.93568e-09	1.12383e-08	acetyl-CoA acetyltransferase 1	Upregulated
HELZ	9931	0	183.661	0.001	0.788095	9.62223	1.28086e-57	3.07231e-55	helicase with zinc finger	Upregulated
GABPB1	2553	0	40.0459	0.001	0.787969	9.622	3.6043e-13	3.42857e-12	GA binding protein transcription factor, beta subunit 1	Upregulated
TOPBP1	11073	0	71.0694	0.001	0.786719	9.6197	8.33592e-23	2.22164e-21	topoisomerase (DNA) II binding protein 1	Upregulated
AIMP2	7965	0	16.16	0.001	0.786718	9.6197	1.03955e-05	3.50712e-05	aminoacyl tRNA synthetase complex-interacting multifunctional protein 2	Upregulated
INO80C	125476	0	13.8636	0.001	0.786238	9.61882	8.89914e-05	0.000256088	INO80 complex subunit C	Upregulated
CPSF3	51692	0	31.5721	0.001	0.785924	9.61825	2.26114e-10	1.51565e-09	cleavage and polyadenylation specific factor 3, 73kDa	Upregulated
ZEB1	6935	0	76.4187	0.001	0.784611	9.61583	2.32692e-24	7.29877e-23	zinc finger E-box binding homeobox 1	Upregulated
LOC728819	728819	0	15.2421	0.001	0.784508	9.61564	2.12658e-05	6.80116e-05	hCG1645220	Upregulated
SEC24B	10427	0	63.1639	0.001	0.783867	9.61447	2.5564e-20	5.33659e-19	SEC24 family member B	Upregulated
PKN2	5586	0	80.3003	0.001	0.782882	9.61265	1.32875e-25	4.76675e-24	protein kinase N2	Upregulated
DIS3L2	129563	0	45.0224	0.001	0.781927	9.61089	1.00612e-14	1.13332e-13	DIS3 like 3'-5' exoribonuclease 2	Upregulated
FAM120C	54954	0	25.0584	0.001	0.780513	9.60828	1.65705e-08	8.42856e-08	family with sequence similarity 120C	Upregulated
CHD2	1106	0	122.997	0.001	0.78008	9.60748	1.17058e-38	1.13648e-36	chromodomain helicase DNA binding protein 2	Upregulated
HECTD2	143279	0	64.4606	0.001	0.777995	9.60362	1.24967e-20	2.67727e-19	HECT domain containing E3 ubiquitin protein ligase 2	Upregulated
PRSS42	339906	0	11.325	0.001	0.776974	9.60172	0.000372406	0.000947907	protease, serine, 42	Upregulated
UBE2G1	7326	0	54.8029	0.001	0.776012	9.59994	1.60376e-17	2.51845e-16	ubiquitin-conjugating enzyme E2G 1	Upregulated
PLK3	1263	0	30.6983	0.001	0.774568	9.59725	4.62556e-10	2.93336e-09	polo-like kinase 3	Upregulated
CROCCP2	84809	0	22.7825	0.001	0.773469	9.5952	1.41853e-07	6.34707e-07	ciliary rootlet coiled-coil, rootletin pseudogene 2	Upregulated
ZNF16	7564	0	32.855	0.001	0.770965	9.59052	1.10534e-10	7.59214e-10	zinc finger protein 16	Upregulated
WNT5A	7474	0	72.4534	0.001	0.770286	9.58925	4.07492e-23	1.11768e-21	wingless-type MMTV integration site family, member 5A	Upregulated
AGPS	8540	0	99.1594	0.001	0.768525	9.58595	1.65041e-31	9.39043e-30	alkylglycerone phosphate synthase	Upregulated
REEP5	7905	0	40.1287	0.001	0.768452	9.58581	3.6043e-13	3.42059e-12	receptor accessory protein 5	Upregulated
SECISBP2L	9728	0	90.913	0.001	0.766584	9.5823	1.03538e-28	4.8528e-27	SECIS binding protein 2-like	Upregulated
CRLS1	54675	0	47.6905	0.001	0.765351	9.57998	2.40424e-15	2.92647e-14	cardiolipin synthase 1	Upregulated
PWWP2B	170394	0	33.6309	0.001	0.764974	9.57927	5.40332e-11	3.92045e-10	PWWP domain containing 2B	Upregulated
SLC39A6	25800	0	29.1278	0.001	0.762536	9.57466	9.46234e-10	5.77033e-09	solute carrier family 39 (zinc transporter), member 6	Upregulated
SBNO1	55206	0	140.781	0.001	0.762212	9.57405	2.97426e-44	3.82991e-42	strawberry notch homolog 1 (Drosophila)	Upregulated
PGP	283871	0	39.9623	0.001	0.760357	9.57053	7.37316e-13	6.66636e-12	phosphoglycolate phosphatase	Upregulated
ABHD17A	81926	0	20.2437	0.001	0.759923	9.56971	5.93618e-07	2.39424e-06	abhydrolase domain containing 17A	Upregulated
BCAR3	8412	0	40.7473	0.001	0.758628	9.56725	3.6043e-13	3.41265e-12	breast cancer anti-estrogen resistance 3	Upregulated
RREB1	6239	0	101.839	0.001	0.757575	9.56524	3.94386e-32	2.40026e-30	ras responsive element binding protein 1	Upregulated
FAM21A	387680	0	59.1078	0.001	0.755653	9.56158	4.47678e-19	8.1738e-18	family with sequence similarity 21, member A	Upregulated
CFL2	1073	0	41.1126	0.001	0.755641	9.56156	1.76192e-13	1.71332e-12	cofilin 2 (muscle)	Upregulated
ATRX	546	0	141.176	0.001	0.754304	9.559	1.45394e-44	1.89213e-42	alpha thalassemia/mental retardation syndrome X-linked	Upregulated
UBXN2A	165324	0	24.0357	0.001	0.753907	9.55824	3.38976e-08	1.67543e-07	UBX domain protein 2A	Upregulated
MIER3	166968	0	66.0137	0.001	0.75373	9.5579	2.98624e-21	6.77749e-20	mesoderm induction early response 1, family member 3	Upregulated
ANAPC4	29945	0	34.0679	0.001	0.753261	9.55701	2.64136e-11	1.96305e-10	anaphase promoting complex subunit 4	Upregulated
CNPY4	245812	0	19.4001	0.001	0.752481	9.55551	1.21435e-06	4.7249e-06	canopy FGF signaling regulator 4	Upregulated
LAMB2	3913	0	73.5399	0.001	0.75245	9.55545	1.99198e-23	5.6538e-22	laminin, beta 2 (laminin S)	Upregulated
GSK3B	2932	0	89.7218	0.001	0.752264	9.5551	2.11804e-28	9.42181e-27	glycogen synthase kinase 3 beta	Upregulated
NAGK	55577	0	22.547	0.001	0.750027	9.5508	1.41853e-07	6.34012e-07	N-acetylglucosamine kinase	Upregulated
WTAP	9589	0	26.7213	0.001	0.749418	9.54963	8.1003e-09	4.31018e-08	Wilms tumor 1 associated protein	Upregulated
KRT10	3858	0	27.0675	0.001	0.748864	9.54856	3.95974e-09	2.21996e-08	keratin 10, type I	Upregulated
ZNF638	27332	0	81.2274	0.001	0.747817	9.54654	6.49546e-26	2.38616e-24	zinc finger protein 638	Upregulated
PLEK2	26499	0	18.393	0.001	0.746602	9.5442	2.48414e-06	9.14489e-06	pleckstrin 2	Upregulated
COX16	51241	0	20.5562	0.001	0.746117	9.54326	5.93618e-07	2.43437e-06	COX16 cytochrome c oxidase assembly homolog (S. cerevisiae)	Upregulated
CSTB	1476	0	11.5973	0.001	0.745658	9.54237	0.000372406	0.000941248	cystatin B (stefin B)	Upregulated
ECD	11319	0	23.7077	0.001	0.743607	9.5384	6.93434e-08	3.25011e-07	ecdysoneless homolog (Drosophila)	Upregulated
GMPPB	29925	0	19.9205	0.001	0.743509	9.53821	1.21435e-06	4.70098e-06	GDP-mannose pyrophosphorylase B	Upregulated
CPNE2	221184	0	27.989	0.001	0.743178	9.53756	3.95974e-09	2.19382e-08	copine II	Upregulated
CCDC74B-AS1	285103	0	22.7454	0.001	0.742475	9.5362	1.41853e-07	6.27364e-07	mediator complex subunit 15 pseudogene 9	Upregulated
SMAD3	4088	0	72.9574	0.001	0.742465	9.53618	4.07492e-23	1.12019e-21	SMAD family member 3	Upregulated
ANKHD1-EIF4EBP3	404734	0	104.062	0.001	0.741185	9.53369	4.607e-33	3.02997e-31	ANKHD1-EIF4EBP3 readthrough	Upregulated
AUP1	550	0	20.7295	0.001	0.740031	9.53144	5.93618e-07	2.41816e-06	ancient ubiquitous protein 1	Upregulated
BICD2	23299	0	60.2171	0.001	0.739043	9.52951	2.18842e-19	4.08717e-18	bicaudal D homolog 2 (Drosophila)	Upregulated
LINC00501	100820709	0	25.4562	0.001	0.738364	9.52819	1.65705e-08	8.58928e-08	long intergenic non-protein coding RNA 501	Upregulated
ERC1	23085	0	107.353	0.001	0.738336	9.52813	5.38164e-34	3.91867e-32	ELKS/RAB6-interacting/CAST family member 1	Upregulated
ROR1	4919	0	36.5099	0.001	0.737468	9.52644	6.31186e-12	5.14068e-11	receptor tyrosine kinase-like orphan receptor 1	Upregulated
ACBD4	79777	0	19.1434	0.001	0.736298	9.52415	1.21435e-06	4.65823e-06	acyl-CoA binding domain containing 4	Upregulated
PAQR4	124222	0	28.467	0.001	0.734509	9.52064	1.93568e-09	1.11694e-08	progestin and adipoQ receptor family member IV	Upregulated
NAA16	79612	0	53.6143	0.001	0.73278	9.51724	3.28074e-17	4.90028e-16	N(alpha)-acetyltransferase 16, NatA auxiliary subunit	Upregulated
PHOSPHO1	162466	0	26.6063	0.001	0.732351	9.51639	8.1003e-09	4.32901e-08	phosphatase, orphan 1	Upregulated
NT5C3B	115024	0	17.4368	0.001	0.73233	9.51635	5.08172e-06	1.79563e-05	5'-nucleotidase, cytosolic IIIB	Upregulated
TGFA	7039	0	53.1237	0.001	0.731898	9.5155	3.28074e-17	4.94862e-16	transforming growth factor, alpha	Upregulated
FAM63A	55793	0	25.2279	0.001	0.731744	9.5152	1.65705e-08	8.49568e-08	family with sequence similarity 63, member A	Upregulated
ATF3	467	0	23.6409	0.001	0.731473	9.51466	6.93434e-08	3.24017e-07	activating transcription factor 3	Upregulated
CD2BP2	10421	0	42.0389	0.001	0.729685	9.51113	8.61294e-14	8.69324e-13	CD2 (cytoplasmic tail) binding protein 2	Upregulated
UST	10090	0	53.7891	0.001	0.728958	9.50969	3.28074e-17	4.88834e-16	uronyl-2-sulfotransferase	Upregulated
INVS	27130	0	41.2611	0.001	0.728326	9.50844	1.76192e-13	1.7229e-12	inversin	Upregulated
TULP1	7287	0	24.0823	0.001	0.728048	9.50789	3.38976e-08	1.65537e-07	tubby like protein 1	Upregulated
FNDC4	64838	0	20.6049	0.001	0.727853	9.5075	5.93618e-07	2.40534e-06	fibronectin type III domain containing 4	Upregulated
LOC729987	729987	0	27.5688	0.001	0.727788	9.50737	3.95974e-09	2.1968e-08	uncharacterized LOC729987	Upregulated
ARFIP2	23647	0	45.4501	0.001	0.727408	9.50662	1.00612e-14	1.15242e-13	ADP-ribosylation factor interacting protein 2	Upregulated
CHN1	1123	0	28.264	0.001	0.726687	9.50519	1.93568e-09	1.1346e-08	chimerin 1	Upregulated
PTPN9	5780	0	48.2704	0.001	0.725949	9.50372	1.17529e-15	1.48988e-14	protein tyrosine phosphatase, non-receptor type 9	Upregulated
ZNF672	79894	0	37.7141	0.001	0.725725	9.50328	3.08548e-12	2.62116e-11	zinc finger protein 672	Upregulated
ARHGEF2	9181	0	50.1544	0.001	0.725598	9.50303	2.8085e-16	3.78791e-15	Rho/Rac guanine nucleotide exchange factor (GEF) 2	Upregulated
NEXN	91624	0	39.0655	0.001	0.725386	9.50261	7.37316e-13	6.8021e-12	nexilin (F actin binding protein)	Upregulated
DCAF15	90379	0	27.4789	0.001	0.72252	9.49689	3.95974e-09	2.222e-08	DDB1 and CUL4 associated factor 15	Upregulated
RNF141	50862	0	49.4286	0.001	0.721252	9.49436	5.74526e-16	7.54096e-15	ring finger protein 141	Upregulated
IQGAP2	10788	0	67.4136	0.001	0.720835	9.49353	1.45979e-21	3.37573e-20	IQ motif containing GTPase activating protein 2	Upregulated
KAT2A	2648	0	37.7752	0.001	0.720824	9.4935	3.08548e-12	2.61752e-11	K(lysine) acetyltransferase 2A	Upregulated
GPR15	2838	0	14.9889	0.001	0.720254	9.49236	4.35024e-05	0.000130433	G protein-coupled receptor 15	Upregulated
CYP27A1	1593	0	28.7608	0.001	0.719868	9.49159	1.93568e-09	1.12973e-08	cytochrome P450, family 27, subfamily A, polypeptide 1	Upregulated
RABIF	5877	0	38.9133	0.001	0.719408	9.49067	1.5083e-12	1.32456e-11	RAB interacting factor	Upregulated
TMEM62	80021	0	33.898	0.001	0.719224	9.4903	5.40332e-11	3.91349e-10	transmembrane protein 62	Upregulated
PDF	64146	0	14.0941	0.001	0.719187	9.49022	4.35024e-05	0.000131953	peptide deformylase (mitochondrial)	Upregulated
MARK3	4140	0	39.2981	0.001	0.718243	9.48833	7.37316e-13	6.73606e-12	MAP/microtubule affinity-regulating kinase 3	Upregulated
PHF3	23469	0	96.07	0.001	0.717771	9.48738	1.41284e-30	7.35459e-29	PHD finger protein 3	Upregulated
ACOT8	10005	0	14.1263	0.001	0.715904	9.48362	4.35024e-05	0.000130978	acyl-CoA thioesterase 8	Upregulated
DCPS	28960	0	17.8858	0.001	0.715249	9.4823	5.08172e-06	1.79615e-05	decapping enzyme, scavenger	Upregulated
NSD1	64324	0	156.448	0.001	0.715226	9.48226	3.1625e-49	5.29957e-47	nuclear receptor binding SET domain protein 1	Upregulated
ORC6	23594	0	19.6022	0.001	0.714992	9.48178	1.21435e-06	4.68911e-06	origin recognition complex, subunit 6	Upregulated
MOCS2	4338	0	50.3404	0.001	0.714186	9.48016	2.8085e-16	3.7548e-15	molybdenum cofactor synthesis 2	Upregulated
C5orf15	56951	0	27.4363	0.001	0.713812	9.4794	3.95974e-09	2.2018e-08	chromosome 5 open reading frame 15	Upregulated
REEP4	80346	0	20.6139	0.001	0.713727	9.47923	5.93618e-07	2.40216e-06	receptor accessory protein 4	Upregulated
ATP6V0A1	535	0	50.149	0.001	0.713689	9.47915	2.8085e-16	3.80469e-15	ATPase, H+ transporting, lysosomal V0 subunit a1	Upregulated
GTPBP4	23560	0	30.2326	0.001	0.711965	9.47566	4.62556e-10	2.92124e-09	GTP binding protein 4	Upregulated
TJAP1	93643	0	30.746	0.001	0.711352	9.47442	4.62556e-10	2.91522e-09	tight junction associated protein 1 (peripheral)	Upregulated
CPQ	10404	0	23.1523	0.001	0.711164	9.47404	6.93434e-08	3.21683e-07	carboxypeptidase Q	Upregulated
RCBTB1	55213	0	48.1578	0.001	0.710041	9.47176	1.17529e-15	1.49608e-14	regulator of chromosome condensation (RCC1) and BTB (POZ) domain containing protein 1	Upregulated
PLA2G15	23659	0	32.8411	0.001	0.709482	9.47062	1.10534e-10	7.72663e-10	phospholipase A2, group XV	Upregulated
PDRG1	81572	0	16.3356	0.001	0.709168	9.46998	1.03955e-05	3.50809e-05	p53 and DNA-damage regulated 1	Upregulated
PURA	5813	0	63.163	0.001	0.708983	9.46961	2.5564e-20	5.30041e-19	purine-rich element binding protein A	Upregulated
SDCBP	6386	0	25.5317	0.001	0.708688	9.46901	1.65705e-08	8.38325e-08	syndecan binding protein (syntenin)	Upregulated
DLX5	1749	0	16.8009	0.001	0.708635	9.4689	1.03955e-05	3.50229e-05	distal-less homeobox 5	Upregulated
SERP1	27230	0	37.7618	0.001	0.70827	9.46816	3.08548e-12	2.62298e-11	stress-associated endoplasmic reticulum protein 1	Upregulated
SRSF11	9295	0	33.3152	0.001	0.707617	9.46682	5.40332e-11	3.8836e-10	serine/arginine-rich splicing factor 11	Upregulated
MORC3	23515	0	50.4085	0.001	0.707373	9.46633	2.8085e-16	3.74661e-15	MORC family CW-type zinc finger 3	Upregulated
ATP6V1D	51382	0	21.5267	0.001	0.707362	9.4663	2.90184e-07	1.25038e-06	ATPase, H+ transporting, lysosomal 34kDa, V1 subunit D	Upregulated
ZDHHC13	54503	0	27.2324	0.001	0.707267	9.46611	3.95974e-09	2.2159e-08	zinc finger, DHHC-type containing 13	Upregulated
PET117	100303755	0	13.788	0.001	0.707213	9.466	8.89914e-05	0.000252583	PET117 homolog (S. cerevisiae)	Upregulated
UBE2K	3093	0	60.6282	0.001	0.707009	9.46558	2.18842e-19	4.08094e-18	ubiquitin-conjugating enzyme E2K	Upregulated
ZMYM3	9203	0	41.3145	0.001	0.705869	9.46326	1.76192e-13	1.71878e-12	zinc finger, MYM-type 3	Upregulated
TOPORS	10210	0	47.1722	0.001	0.704968	9.46141	2.40424e-15	2.94405e-14	topoisomerase I binding, arginine/serine-rich, E3 ubiquitin protein ligase	Upregulated
WWP1	11059	0	48.7336	0.001	0.704871	9.46122	1.17529e-15	1.4822e-14	WW domain containing E3 ubiquitin protein ligase 1	Upregulated
HSBP1	3281	0	23.3544	0.001	0.70282	9.45701	6.93434e-08	3.21317e-07	heat shock factor binding protein 1	Upregulated
GDE1	51573	0	34.8438	0.001	0.702616	9.45659	2.64136e-11	1.97867e-10	glycerophosphodiester phosphodiesterase 1	Upregulated
ANKRD28	23243	0	71.5504	0.001	0.701031	9.45333	8.33592e-23	2.18827e-21	ankyrin repeat domain 28	Upregulated
MTMR12	54545	0	57.1877	0.001	0.699607	9.4504	1.87342e-18	3.25072e-17	myotubularin related protein 12	Upregulated
STIL	6491	0	59.744	0.001	0.699309	9.44979	4.47678e-19	8.21056e-18	SCL/TAL1 interrupting locus	Upregulated
CDCA7L	55536	0	33.6789	0.001	0.699288	9.44974	5.40332e-11	3.86995e-10	cell division cycle associated 7-like	Upregulated
NPC1	4864	0	56.5291	0.001	0.697445	9.44594	3.83238e-18	6.33534e-17	Niemann-Pick disease, type C1	Upregulated
SMDT1	91689	0	18.4227	0.001	0.697251	9.44553	2.48414e-06	9.18081e-06	single-pass membrane protein with aspartate-rich tail 1	Upregulated
HSDL2	84263	0	37.0653	0.001	0.696749	9.4445	3.08548e-12	2.63949e-11	hydroxysteroid dehydrogenase like 2	Upregulated
CLK2	1196	0	24.5995	0.001	0.69583	9.44259	3.38976e-08	1.66333e-07	CDC-like kinase 2	Upregulated
KIAA0586	9786	0	50.5206	0.001	0.694978	9.44082	2.8085e-16	3.76715e-15	KIAA0586	Upregulated
WIBG	84305	0	12.7285	0.001	0.694275	9.43936	0.000182047	0.0004902	within bgcn homolog (Drosophila)	Upregulated
WDR62	284403	0	55.1328	0.001	0.694071	9.43894	7.83978e-18	1.27025e-16	WD repeat domain 62	Upregulated
SNAPC4	6621	0	54.274	0.001	0.693557	9.43787	1.60376e-17	2.48339e-16	small nuclear RNA activating complex, polypeptide 4, 190kDa	Upregulated
ZMYND19	116225	0	15.8133	0.001	0.693084	9.43689	2.12658e-05	6.80294e-05	zinc finger, MYND-type containing 19	Upregulated
TTC26	79989	0	45.9568	0.001	0.692207	9.43506	1.00612e-14	1.15566e-13	tetratricopeptide repeat domain 26	Upregulated
HAUS4	54930	0	18.9749	0.001	0.68999	9.43043	2.48414e-06	9.11199e-06	HAUS augmin-like complex, subunit 4	Upregulated
RAP1GDS1	5910	0	40.367	0.001	0.688978	9.42831	3.6043e-13	3.40474e-12	RAP1, GTP-GDP dissociation stimulator 1	Upregulated
SMPD2	6610	0	19.457	0.001	0.687306	9.42481	1.21435e-06	4.66408e-06	sphingomyelin phosphodiesterase 2, neutral membrane (neutral sphingomyelinase)	Upregulated
NSMF	26012	0	42.0065	0.001	0.68693	9.42402	8.61294e-14	8.67892e-13	NMDA receptor synaptonuclear signaling and neuronal migration factor	Upregulated
DNAJB4	11080	0	25.8228	0.001	0.686274	9.42264	1.65705e-08	8.40759e-08	DnaJ (Hsp40) homolog, subfamily B, member 4	Upregulated
LCLAT1	253558	0	56.6451	0.001	0.686179	9.42244	3.83238e-18	6.40458e-17	lysocardiolipin acyltransferase 1	Upregulated
ZBTB42	100128927	0	41.8865	0.001	0.684026	9.41791	1.76192e-13	1.73819e-12	zinc finger and BTB domain containing 42	Upregulated
RABGAP1	23637	0	57.3394	0.001	0.683018	9.41578	1.87342e-18	3.24152e-17	RAB GTPase activating protein 1	Upregulated
FIGN	55137	0	51.9875	0.001	0.682867	9.41546	1.37291e-16	1.93711e-15	fidgetin	Upregulated
PEX6	5190	0	40.2182	0.001	0.682511	9.41471	3.6043e-13	3.38904e-12	peroxisomal biogenesis factor 6	Upregulated
GINS3	64785	0	27.563	0.001	0.682404	9.41448	3.95974e-09	2.21084e-08	GINS complex subunit 3 (Psf3 homolog)	Upregulated
C9orf114	51490	0	49.2642	0.001	0.682281	9.41422	5.74526e-16	7.52481e-15	chromosome 9 open reading frame 114	Upregulated
EPAG	10824	0	11.0358	0.001	0.682205	9.41406	0.000372406	0.000946922	DIAPH2 antisense RNA 1	Upregulated
DDI2	84301	0	30.5963	0.001	0.681837	9.41328	4.62556e-10	2.96099e-09	DNA-damage inducible 1 homolog 2 (S. cerevisiae)	Upregulated
TAX1BP1	8887	0	38.6151	0.001	0.68139	9.41234	1.5083e-12	1.32837e-11	Tax1 (human T-cell leukemia virus type I) binding protein 1	Upregulated
CORO2B	10391	0	39.0837	0.001	0.680469	9.41039	7.37316e-13	6.69109e-12	coronin, actin binding protein, 2B	Upregulated
TNIK	23043	0	63.2813	0.001	0.679959	9.4093	2.5564e-20	5.29145e-19	TRAF2 and NCK interacting kinase	Upregulated
NRBP1	29959	0	25.0679	0.001	0.677745	9.4046	1.65705e-08	8.4041e-08	nuclear receptor binding protein 1	Upregulated
SLTM	79811	0	46.6881	0.001	0.676935	9.40287	4.91828e-15	5.77402e-14	SAFB-like, transcription modulator	Upregulated
SUDS3	64426	0	53.6999	0.001	0.676462	9.40187	3.28074e-17	4.87055e-16	suppressor of defective silencing 3 homolog (S. cerevisiae)	Upregulated
UBN1	29855	0	64.2154	0.001	0.676283	9.40148	1.24967e-20	2.65403e-19	ubinuclein 1	Upregulated
DHODH	1723	0	27.5502	0.001	0.675325	9.39944	3.95974e-09	2.20782e-08	dihydroorotate dehydrogenase (quinone)	Upregulated
GLI3	2737	0	93.3595	0.001	0.674754	9.39822	1.20948e-29	5.84803e-28	GLI family zinc finger 3	Upregulated
BLOC1S2	282991	0	29.8667	0.001	0.673416	9.39535	9.46234e-10	5.78186e-09	biogenesis of lysosomal organelles complex-1, subunit 2	Upregulated
SGPL1	8879	0	65.4198	0.001	0.673313	9.39513	6.10886e-21	1.34891e-19	sphingosine-1-phosphate lyase 1	Upregulated
SCAPER	49855	0	54.6744	0.001	0.672604	9.39361	1.60376e-17	2.49285e-16	S-phase cyclin A-associated protein in the ER	Upregulated
SNAPC1	6617	0	30.137	0.001	0.670595	9.3893	4.62556e-10	2.94557e-09	small nuclear RNA activating complex, polypeptide 1, 43kDa	Upregulated
NLE1	54475	0	29.4768	0.001	0.670229	9.38851	9.46234e-10	5.70492e-09	notchless homolog 1 (Drosophila)	Upregulated
LIPA	3988	0	29.9902	0.001	0.66984	9.38767	9.46234e-10	5.71619e-09	lipase A, lysosomal acid, cholesterol esterase	Upregulated
IKBKAP	8518	0	68.9535	0.001	0.669508	9.38696	7.13604e-22	1.70498e-20	inhibitor of kappa light polypeptide gene enhancer in B-cells, kinase complex-associated protein	Upregulated
NSA2	10412	0	15.6212	0.001	0.669255	9.38641	2.12658e-05	6.82794e-05	NSA2 ribosome biogenesis homolog (S. cerevisiae)	Upregulated
MPDU1	9526	0	18.1633	0.001	0.668671	9.38515	2.48414e-06	9.21701e-06	mannose-P-dolichol utilization defect 1	Upregulated
KRT86	3892	0	23.3341	0.001	0.667674	9.383	6.93434e-08	3.234e-07	keratin 86, type II	Upregulated
SYPL1	6856	0	25.6268	0.001	0.666149	9.3797	1.65705e-08	8.53503e-08	synaptophysin-like 1	Upregulated
SUZ12	23512	0	50.0049	0.001	0.665366	9.378	2.8085e-16	3.81314e-15	SUZ12 polycomb repressive complex 2 subunit	Upregulated
NFKBIB	4793	0	22.5827	0.001	0.664747	9.37666	1.41853e-07	6.29184e-07	nuclear factor of kappa light polypeptide gene enhancer in B-cells inhibitor, beta	Upregulated
WDR89	112840	0	35.2837	0.001	0.663047	9.37297	1.29119e-11	1.00096e-10	WD repeat domain 89	Upregulated
GSS	2937	0	21.2326	0.001	0.662833	9.3725	2.90184e-07	1.23515e-06	glutathione synthetase	Upregulated
TOP2B	7155	0	59.6072	0.001	0.662059	9.37082	4.47678e-19	8.13736e-18	topoisomerase (DNA) II beta 180kDa	Upregulated
SEC22B	9554	0	20.8575	0.001	0.660153	9.36666	5.93618e-07	2.39187e-06	SEC22 vesicle trafficking protein homolog B (S. cerevisiae) (gene/pseudogene)	Upregulated
MMGT1	93380	0	41.004	0.001	0.659987	9.36629	1.76192e-13	1.73539e-12	membrane magnesium transporter 1	Upregulated
NDEL1	81565	0	26.5612	0.001	0.659527	9.36529	8.1003e-09	4.3614e-08	nudE neurodevelopment protein 1-like 1	Upregulated
CDADC1	81602	0	25.6166	0.001	0.659241	9.36466	1.65705e-08	8.51352e-08	cytidine and dCMP deaminase domain containing 1	Upregulated
BRMS1	25855	0	14.9051	0.001	0.658631	9.36333	4.35024e-05	0.000131496	breast cancer metastasis suppressor 1	Upregulated
TFAP2A	7020	0	36.3307	0.001	0.656728	9.35915	6.31186e-12	5.18556e-11	transcription factor AP-2 alpha (activating enhancer binding protein 2 alpha)	Upregulated
VAPB	9217	0	85.6539	0.001	0.65614	9.35786	3.70914e-27	1.5486e-25	VAMP (vesicle-associated membrane protein)-associated protein B and C	Upregulated
SCAF8	22828	0	57.0919	0.001	0.655214	9.35582	1.87342e-18	3.23694e-17	SR-related CTD-associated factor 8	Upregulated
NUP160	23279	0	59.0864	0.001	0.653461	9.35196	4.47678e-19	8.16162e-18	nucleoporin 160kDa	Upregulated
UHMK1	127933	0	91.8613	0.001	0.653425	9.35188	5.06134e-29	2.39982e-27	U2AF homology motif (UHM) kinase 1	Upregulated
EXOC3	11336	0	30.3295	0.001	0.652848	9.3506	4.62556e-10	2.94864e-09	exocyst complex component 3	Upregulated
COQ5	84274	0	16.6252	0.001	0.652097	9.34894	1.03955e-05	3.47549e-05	coenzyme Q5 homolog, methyltransferase (S. cerevisiae)	Upregulated
GRAMD4	23151	0	47.4657	0.001	0.652047	9.34883	2.40424e-15	2.95886e-14	GRAM domain containing 4	Upregulated
CNTRL	11064	0	81.4581	0.001	0.652026	9.34879	6.49546e-26	2.39334e-24	centriolin	Upregulated
BCAN	63827	0	31.3696	0.001	0.651828	9.34835	2.26114e-10	1.51233e-09	brevican	Upregulated
PATZ1	23598	0	32.9642	0.001	0.651216	9.34699	1.10534e-10	7.63932e-10	POZ (BTB) and AT hook containing zinc finger 1	Upregulated
TXNDC17	84817	0	22.578	0.001	0.651062	9.34665	1.41853e-07	6.38444e-07	thioredoxin domain containing 17	Upregulated
WDFY1	57590	0	51.1588	0.001	0.650806	9.34608	1.37291e-16	1.93043e-15	WD repeat and FYVE domain containing 1	Upregulated
ACO1	48	0	38.8526	0.001	0.650593	9.34561	1.5083e-12	1.3351e-11	aconitase 1, soluble	Upregulated
E2F3	1871	0	49.9631	0.001	0.650363	9.3451	5.74526e-16	7.53288e-15	E2F transcription factor 3	Upregulated
LIMS3L	100288695	0	27.7408	0.001	0.649417	9.343	3.95974e-09	2.1998e-08	LIM and senescent cell antigen-like domains 3-like	Upregulated
TAB2	23118	0	46.4885	0.001	0.649336	9.34282	4.91828e-15	5.84129e-14	TGF-beta activated kinase 1/MAP3K7 binding protein 2	Upregulated
TRUB2	26995	0	15.5581	0.001	0.649291	9.34272	2.12658e-05	6.71687e-05	TruB pseudouridine (psi) synthase family member 2	Upregulated
RIF1	55183	0	106.733	0.001	0.64898	9.34203	1.1009e-33	7.65191e-32	replication timing regulatory factor 1	Upregulated
TMEM209	84928	0	38.7239	0.001	0.648621	9.34123	1.5083e-12	1.33221e-11	transmembrane protein 209	Upregulated
MVK	4598	0	22.4676	0.001	0.647879	9.33958	1.41853e-07	6.32164e-07	mevalonate kinase	Upregulated
VWA8	23078	0	46.1921	0.001	0.646093	9.3356	4.91828e-15	5.84697e-14	von Willebrand factor A domain containing 8	Upregulated
FAM153C	653316	0	11.5331	0.001	0.645689	9.3347	0.000372406	0.000940083	family with sequence similarity 153, member C, pseudogene	Upregulated
SOCS6	9306	0	63.4036	0.001	0.64551	9.3343	2.5564e-20	5.2736e-19	suppressor of cytokine signaling 6	Upregulated
MPZL1	9019	0	54.4576	0.001	0.645194	9.33359	1.60376e-17	2.49602e-16	myelin protein zero-like 1	Upregulated
CCDC57	284001	0	32.3559	0.001	0.644348	9.3317	1.10534e-10	7.68273e-10	coiled-coil domain containing 57	Upregulated
OTUD6B	51633	0	35.7005	0.001	0.644159	9.33127	1.29119e-11	1.0016e-10	OTU domain containing 6B	Upregulated
BRSK1	84446	0	33.5405	0.001	0.643744	9.33034	5.40332e-11	3.92977e-10	BR serine/threonine kinase 1	Upregulated
WRAP53	55135	0	19.7027	0.001	0.642446	9.32743	1.21435e-06	4.67877e-06	WD repeat containing, antisense to TP53	Upregulated
PGS1	9489	0	23.54	0.001	0.642287	9.32707	6.93434e-08	3.2601e-07	phosphatidylglycerophosphate synthase 1	Upregulated
OSTM1	28962	0	48.0112	0.001	0.640273	9.32254	1.17529e-15	1.49142e-14	osteopetrosis associated transmembrane protein 1	Upregulated
STX10	8677	0	13.7127	0.001	0.640093	9.32214	8.89914e-05	0.000252524	syntaxin 10	Upregulated
PPP1CC	5501	0	17.3195	0.001	0.638795	9.31921	5.08172e-06	1.77664e-05	protein phosphatase 1, catalytic subunit, gamma isozyme	Upregulated
IKBKB	3551	0	42.9542	0.001	0.638714	9.31903	8.61294e-14	8.76557e-13	inhibitor of kappa light polypeptide gene enhancer in B-cells, kinase beta	Upregulated
PAXIP1	22976	0	39.8858	0.001	0.638698	9.31899	7.37316e-13	6.80724e-12	PAX interacting (with transcription-activation domain) protein 1	Upregulated
PON2	5445	0	17.3807	0.001	0.638277	9.31804	5.08172e-06	1.75905e-05	paraoxonase 2	Upregulated
MED22	6837	0	41.8699	0.001	0.638264	9.31801	1.76192e-13	1.72428e-12	mediator complex subunit 22	Upregulated
APITD1-CORT	100526739	0	15.4566	0.001	0.636966	9.31507	2.12658e-05	6.72904e-05	APITD1-CORT readthrough	Upregulated
DHRS7B	25979	0	19.5764	0.001	0.63693	9.31499	1.21435e-06	4.7189e-06	dehydrogenase/reductase (SDR family) member 7B	Upregulated
RAB9B	51209	0	40.5272	0.001	0.635929	9.31272	3.6043e-13	3.40211e-12	RAB9B, member RAS oncogene family	Upregulated
CDC7	8317	0	33.97	0.001	0.635744	9.3123	5.40332e-11	3.91813e-10	cell division cycle 7	Upregulated
BDNF	627	0	41.1953	0.001	0.635079	9.31079	1.76192e-13	1.72704e-12	brain-derived neurotrophic factor	Upregulated
TMEM194A	23306	0	57.7238	0.001	0.634842	9.31025	1.87342e-18	3.22328e-17	transmembrane protein 194A	Upregulated
N4BP1	9683	0	75.9404	0.001	0.634385	9.30921	4.7601e-24	1.45576e-22	NEDD4 binding protein 1	Upregulated
FBXO36	130888	0	30.0808	0.001	0.634152	9.30868	4.62556e-10	2.91072e-09	F-box protein 36	Upregulated
NUDT16L1	84309	0	14.4804	0.001	0.633317	9.30678	4.35024e-05	0.000129355	nudix (nucleoside diphosphate linked moiety X)-type motif 16-like 1	Upregulated
PRDM4	11108	0	44.8477	0.001	0.63248	9.30488	2.05818e-14	2.24801e-13	PR domain containing 4	Upregulated
C11orf72	100505621	0	25.7159	0.001	0.632191	9.30422	1.65705e-08	8.5171e-08	chromosome 11 open reading frame 72	Upregulated
TPK1	27010	0	24.3139	0.001	0.631467	9.30256	3.38976e-08	1.66134e-07	thiamin pyrophosphokinase 1	Upregulated
MEMO1	51072	0	13.5531	0.001	0.631324	9.30224	8.89914e-05	0.0002513	mediator of cell motility 1	Upregulated
NXNL2	158046	0	15.5124	0.001	0.630967	9.30142	2.12658e-05	6.77283e-05	nucleoredoxin-like 2	Upregulated
CD46	4179	0	33.357	0.001	0.630836	9.30112	5.40332e-11	3.92511e-10	CD46 molecule, complement regulatory protein	Upregulated
KDELC1	79070	0	22.4482	0.001	0.630768	9.30097	1.41853e-07	6.3587e-07	KDEL (Lys-Asp-Glu-Leu) containing 1	Upregulated
NBAS	51594	0	75.2848	0.001	0.630417	9.30016	4.7601e-24	1.43779e-22	neuroblastoma amplified sequence	Upregulated
ATP6V1H	51606	0	21.9092	0.001	0.630247	9.29977	2.90184e-07	1.23817e-06	ATPase, H+ transporting, lysosomal 50/57kDa, V1 subunit H	Upregulated
ZNF644	84146	0	61.1313	0.001	0.62994	9.29907	1.06979e-19	2.06415e-18	zinc finger protein 644	Upregulated
SDF2	6388	0	13.2136	0.001	0.629847	9.29886	8.89914e-05	0.000253406	stromal cell-derived factor 2	Upregulated
KAT7	11143	0	37.6026	0.001	0.627359	9.29315	3.08548e-12	2.63396e-11	K(lysine) acetyltransferase 7	Upregulated
RNF14	9604	0	42.1796	0.001	0.627354	9.29314	8.61294e-14	8.72925e-13	ring finger protein 14	Upregulated
RRBP1	6238	0	39.3889	0.001	0.626287	9.29068	7.37316e-13	6.75624e-12	ribosome binding protein 1	Upregulated
C17orf100	388327	0	16.2727	0.001	0.625861	9.2897	1.03955e-05	3.49363e-05	chromosome 17 open reading frame 100	Upregulated
ADAR	103	0	70.7103	0.001	0.625099	9.28794	1.70525e-22	4.40091e-21	adenosine deaminase, RNA-specific	Upregulated
BCAS2	10286	0	13.6159	0.001	0.624928	9.28755	8.89914e-05	0.000251474	breast carcinoma amplified sequence 2	Upregulated
ANAPC1P1	100286979	0	18.4623	0.001	0.624652	9.28691	2.48414e-06	9.14765e-06	anaphase promoting complex subunit 1 pseudogene 1	Upregulated
ZFP91	80829	0	60.153	0.001	0.624552	9.28668	2.18842e-19	4.09968e-18	ZFP91 zinc finger protein	Upregulated
MFAP1	4236	0	21.52	0.001	0.624193	9.28585	2.90184e-07	1.23558e-06	microfibrillar-associated protein 1	Upregulated
ANKRD9	122416	0	16.9134	0.001	0.623818	9.28498	1.03955e-05	3.46036e-05	ankyrin repeat domain 9	Upregulated
RNF114	55905	0	25.8339	0.001	0.622962	9.283	1.65705e-08	8.54943e-08	ring finger protein 114	Upregulated
LRRC3B	116135	0	17.8522	0.001	0.622832	9.2827	5.08172e-06	1.76354e-05	leucine rich repeat containing 3B	Upregulated
SGPP1	81537	0	35.2793	0.001	0.622552	9.28205	1.29119e-11	1.01186e-10	sphingosine-1-phosphate phosphatase 1	Upregulated
GSTCD	79807	0	42.9462	0.001	0.620861	9.27813	8.61294e-14	8.70761e-13	glutathione S-transferase, C-terminal domain containing	Upregulated
TTC12	54970	0	24.1949	0.001	0.62077	9.27792	3.38976e-08	1.67205e-07	tetratricopeptide repeat domain 12	Upregulated
MARS2	92935	0	32.1734	0.001	0.618906	9.27358	1.10534e-10	7.63501e-10	methionyl-tRNA synthetase 2, mitochondrial	Upregulated
OGG1	4968	0	17.0317	0.001	0.618192	9.27191	5.08172e-06	1.78532e-05	8-oxoguanine DNA glycosylase	Upregulated
THUMPD3	25917	0	39.1306	0.001	0.617934	9.27131	7.37316e-13	6.77146e-12	THUMP domain containing 3	Upregulated
FUBP3	8939	0	32.8706	0.001	0.617701	9.27076	1.10534e-10	7.68709e-10	far upstream element (FUSE) binding protein 3	Upregulated
VPS52	6293	0	31.5261	0.001	0.617667	9.27069	2.26114e-10	1.50493e-09	vacuolar protein sorting 52 homolog (S. cerevisiae)	Upregulated
BUB1	699	0	35.8125	0.001	0.616382	9.26768	1.29119e-11	9.99695e-11	BUB1 mitotic checkpoint serine/threonine kinase	Upregulated
UBE2D3	7323	0	41.7031	0.001	0.616119	9.26707	1.76192e-13	1.71468e-12	ubiquitin-conjugating enzyme E2D 3	Upregulated
PSMD1	5707	0	32.6063	0.001	0.615855	9.26645	1.10534e-10	7.65229e-10	proteasome (prosome, macropain) 26S subunit, non-ATPase, 1	Upregulated
PTPLB	201562	0	12.1326	0.001	0.61539	9.26536	0.000182047	0.000495324	3-hydroxyacyl-CoA dehydratase 2	Upregulated
DPP8	54878	0	42.1166	0.001	0.615313	9.26518	8.61294e-14	8.71481e-13	dipeptidyl-peptidase 8	Upregulated
MED7	9443	0	11.3763	0.001	0.614309	9.26282	0.000372406	0.000948697	mediator complex subunit 7	Upregulated
SLC19A1	6573	0	22.5199	0.001	0.613712	9.26142	1.41853e-07	6.30327e-07	solute carrier family 19 (folate transporter), member 1	Upregulated
DGCR9	25787	0	24.9827	0.001	0.613402	9.26069	3.38976e-08	1.662e-07	DiGeorge syndrome critical region gene 9 (non-protein coding)	Upregulated
TMEM158	25907	0	19.2003	0.001	0.612932	9.25958	1.21435e-06	4.7159e-06	transmembrane protein 158 (gene/pseudogene)	Upregulated
EXOSC3	51010	0	17.4306	0.001	0.612804	9.25928	5.08172e-06	1.75755e-05	exosome component 3	Upregulated
NOL11	25926	0	26.4568	0.001	0.612592	9.25878	8.1003e-09	4.31205e-08	nucleolar protein 11	Upregulated
CYP3A5	1577	0	17.9403	0.001	0.612581	9.25876	5.08172e-06	1.79304e-05	cytochrome P450, family 3, subfamily A, polypeptide 5	Upregulated
CYB5B	80777	0	44.0325	0.001	0.612111	9.25765	2.05818e-14	2.23405e-13	cytochrome b5 type B (outer mitochondrial membrane)	Upregulated
DCUN1D3	123879	0	29.5836	0.001	0.611932	9.25723	9.46234e-10	5.75885e-09	DCN1, defective in cullin neddylation 1, domain containing 3	Upregulated
SGCE	8910	0	16.374	0.001	0.61086	9.2547	1.03955e-05	3.48024e-05	sarcoglycan, epsilon	Upregulated
GTF3C2	2976	0	39.9663	0.001	0.610814	9.25459	7.37316e-13	6.711e-12	general transcription factor IIIC, polypeptide 2, beta 110kDa	Upregulated
EVA1A	84141	0	18.6759	0.001	0.610642	9.25418	2.48414e-06	9.20863e-06	eva-1 homolog A (C. elegans)	Upregulated
TEX30	93081	0	11.3028	0.001	0.61034	9.25347	0.000372406	0.00094437	testis expressed 30	Upregulated
UPF2	26019	0	55.1682	0.001	0.609673	9.25189	7.83978e-18	1.27194e-16	UPF2 regulator of nonsense transcripts homolog (yeast)	Upregulated
RBM14-RBM4	100526737	0	16.3797	0.001	0.608673	9.24952	1.03955e-05	3.46696e-05	RBM14-RBM4 readthrough	Upregulated
LRRFIP2	9209	0	29.4109	0.001	0.608488	9.24909	9.46234e-10	5.77321e-09	leucine rich repeat (in FLII) interacting protein 2	Upregulated
FEM1A	55527	0	39.2231	0.001	0.608227	9.24847	7.37316e-13	6.70601e-12	fem-1 homolog a (C. elegans)	Upregulated
DGCR6	8214	0	12.5852	0.001	0.608196	9.24839	0.000182047	0.00049854	DiGeorge syndrome critical region gene 6	Upregulated
MAK16	84549	0	36.5825	0.001	0.607608	9.247	6.31186e-12	5.17513e-11	MAK16 homolog (S. cerevisiae)	Upregulated
PMS2CL	441194	0	17.6172	0.001	0.607488	9.24671	5.08172e-06	1.78224e-05	PMS2 C-terminal like pseudogene	Upregulated
CCDC8	83987	0	33.9499	0.001	0.607401	9.24651	5.40332e-11	3.89504e-10	coiled-coil domain containing 8	Upregulated
ZNF207	7756	0	23.7025	0.001	0.60735	9.24638	6.93434e-08	3.21927e-07	zinc finger protein 207	Upregulated
ZNRF3	84133	0	68.2652	0.001	0.606555	9.24449	7.13604e-22	1.71841e-20	zinc and ring finger 3	Upregulated
CAPN7	23473	0	44.6144	0.001	0.606143	9.24351	2.05818e-14	2.22026e-13	calpain 7	Upregulated
GRAMD1A	57655	0	27.1106	0.001	0.605979	9.24312	3.95974e-09	2.2048e-08	GRAM domain containing 1A	Upregulated
KRCC1	51315	0	17.8588	0.001	0.605961	9.24308	5.08172e-06	1.79511e-05	lysine-rich coiled-coil 1	Upregulated
KIAA0368	23392	0	75.045	0.001	0.603951	9.23829	4.7601e-24	1.45213e-22	KIAA0368	Upregulated
BTN2A2	10385	0	30.0109	0.001	0.603318	9.23677	4.62556e-10	2.93793e-09	butyrophilin, subfamily 2, member A2	Upregulated
STX5	6811	0	18.4702	0.001	0.603252	9.23662	2.48414e-06	9.13116e-06	syntaxin 5	Upregulated
HLTF	6596	0	45.7087	0.001	0.603196	9.23648	1.00612e-14	1.14598e-13	helicase-like transcription factor	Upregulated
METTL1	4234	0	11.2518	0.001	0.602107	9.23388	0.000372406	0.000953862	methyltransferase like 1	Upregulated
PGAP2	27315	0	17.0267	0.001	0.601779	9.23309	5.08172e-06	1.79667e-05	post-GPI attachment to proteins 2	Upregulated
CHURC1-FNTB	100529261	0	28.4392	0.001	0.601467	9.23234	1.93568e-09	1.11589e-08	CHURC1-FNTB readthrough	Upregulated
XAB2	56949	0	27.0066	0.001	0.60139	9.23216	3.95974e-09	2.21488e-08	XPA binding protein 2	Upregulated
TMEM63B	55362	0	32.387	0.001	0.601	9.23122	1.10534e-10	7.60067e-10	transmembrane protein 63B	Upregulated
SPRED3	399473	0	50.6367	0.001	0.600991	9.2312	2.8085e-16	3.7507e-15	sprouty-related, EVH1 domain containing 3	Upregulated
SCAI	286205	0	122.732	0.001	0.600205	9.22931	1.17058e-38	1.12753e-36	suppressor of cancer cell invasion	Upregulated
UAP1	6675	0	23.5036	0.001	0.599405	9.22739	6.93434e-08	3.22172e-07	UDP-N-acetylglucosamine pyrophosphorylase 1	Upregulated
CRTAP	10491	0	67.1393	0.001	0.599063	9.22656	1.45979e-21	3.38213e-20	cartilage associated protein	Upregulated
ATP2B3	492	0	64.6188	0.001	0.598905	9.22618	1.24967e-20	2.66792e-19	ATPase, Ca++ transporting, plasma membrane 3	Upregulated
MYRF	745	0	58.3081	0.001	0.5988	9.22593	9.158e-19	1.62598e-17	myelin regulatory factor	Upregulated
KNSTRN	90417	0	16.9199	0.001	0.596264	9.21981	1.03955e-05	3.50422e-05	kinetochore-localized astrin/SPAG5 binding protein	Upregulated
LRRN4	164312	0	29.7839	0.001	0.596129	9.21948	9.46234e-10	5.72184e-09	leucine rich repeat neuronal 4	Upregulated
FBXO11	80204	0	39.603	0.001	0.596053	9.2193	7.37316e-13	6.78675e-12	F-box protein 11	Upregulated
PARP8	79668	0	70.6332	0.001	0.595922	9.21898	1.70525e-22	4.33687e-21	poly (ADP-ribose) polymerase family, member 8	Upregulated
NUP54	53371	0	21.2233	0.001	0.594696	9.21601	2.90184e-07	1.24337e-06	nucleoporin 54kDa	Upregulated
DSN1	79980	0	21.8356	0.001	0.593601	9.21335	2.90184e-07	1.22789e-06	DSN1, MIS12 kinetochore complex component	Upregulated
RUNX1T1	862	0	72.8731	0.001	0.592394	9.21041	4.07492e-23	1.12525e-21	runt-related transcription factor 1; translocated to, 1 (cyclin D-related)	Upregulated
CDCA7	83879	0	25.7719	0.001	0.591656	9.20861	1.65705e-08	8.46729e-08	cell division cycle associated 7	Upregulated
FAM134C	162427	0	37.5248	0.001	0.59069	9.20626	3.08548e-12	2.61934e-11	family with sequence similarity 134, member C	Upregulated
ARFGAP3	26286	0	28.1495	0.001	0.589458	9.20325	1.93568e-09	1.11536e-08	ADP-ribosylation factor GTPase activating protein 3	Upregulated
ANKRD17	26057	0	89.9935	0.001	0.589214	9.20265	2.11804e-28	9.49084e-27	ankyrin repeat domain 17	Upregulated
AAR2	25980	0	24.4782	0.001	0.588357	9.20055	3.38976e-08	1.664e-07	AAR2 splicing factor homolog (S. cerevisiae)	Upregulated
SLC1A5	6510	0	20.5389	0.001	0.58746	9.19835	5.93618e-07	2.436e-06	solute carrier family 1 (neutral amino acid transporter), member 5	Upregulated
RIN2	54453	0	42.0437	0.001	0.587354	9.19809	8.61294e-14	8.80218e-13	Ras and Rab interactor 2	Upregulated
PPAP2C	8612	0	12.4736	0.001	0.586563	9.19614	0.000182047	0.000490848	phosphatidic acid phosphatase type 2C	Upregulated
STAG1	10274	0	50.8437	0.001	0.585999	9.19475	2.8085e-16	3.80891e-15	stromal antigen 1	Upregulated
PCIF1	63935	0	26.4614	0.001	0.584642	9.19141	8.1003e-09	4.38262e-08	PDX1 C-terminal inhibiting factor 1	Upregulated
ACER3	55331	0	72.4992	0.001	0.583542	9.18869	4.07492e-23	1.12271e-21	alkaline ceramidase 3	Upregulated
SUV39H2	79723	0	29.3299	0.001	0.583108	9.18762	9.46234e-10	5.75598e-09	suppressor of variegation 3-9 homolog 2 (Drosophila)	Upregulated
LRRC7	57554	0	61.8147	0.001	0.582653	9.18649	1.06979e-19	2.04161e-18	leucine rich repeat containing 7	Upregulated
CDK14	5218	0	50.3313	0.001	0.582356	9.18576	2.8085e-16	3.82162e-15	cyclin-dependent kinase 14	Upregulated
SNUPN	10073	0	14.5664	0.001	0.581725	9.18419	4.35024e-05	0.000132346	snurportin 1	Upregulated
C14orf105	55195	0	18.8318	0.001	0.58158	9.18383	2.48414e-06	9.21422e-06	chromosome 14 open reading frame 105	Upregulated
BLOC1S5-TXNDC5	100526836	0	32.6709	0.001	0.581364	9.1833	1.10534e-10	7.71341e-10	BLOC1S5-TXNDC5 readthrough (NMD candidate)	Upregulated
GLE1	2733	0	22.0192	0.001	0.581026	9.18246	1.41853e-07	6.30098e-07	GLE1 RNA export mediator	Upregulated
TMEM260	54916	0	41.6486	0.001	0.580059	9.18006	1.76192e-13	1.72015e-12	transmembrane protein 260	Upregulated
NECAP2	55707	0	19.534	0.001	0.579912	9.17969	1.21435e-06	4.63932e-06	NECAP endocytosis associated 2	Upregulated
LINC00673	100499467	0	22.0497	0.001	0.579511	9.17869	1.41853e-07	6.33318e-07	long intergenic non-protein coding RNA 673	Upregulated
APEX1	328	0	14.5136	0.001	0.578781	9.17687	4.35024e-05	0.000132116	APEX nuclease (multifunctional DNA repair enzyme) 1	Upregulated
PMPCA	23203	0	21.0626	0.001	0.577882	9.17463	2.90184e-07	1.23087e-06	peptidase (mitochondrial processing) alpha	Upregulated
ARSJ	79642	0	45.4885	0.001	0.577805	9.17444	1.00612e-14	1.14812e-13	arylsulfatase family, member J	Upregulated
PTDSS2	81490	0	23.9014	0.001	0.577535	9.17376	6.93434e-08	3.26638e-07	phosphatidylserine synthase 2	Upregulated
MSI1	4440	0	28.8541	0.001	0.576158	9.17032	1.93568e-09	1.12865e-08	musashi RNA-binding protein 1	Upregulated
PKP2	5318	0	42.9198	0.001	0.575998	9.16992	8.61294e-14	8.78017e-13	plakophilin 2	Upregulated
RILP	83547	0	17.3674	0.001	0.575792	9.1694	5.08172e-06	1.79771e-05	Rab interacting lysosomal protein	Upregulated
KIAA1009	22832	0	49.4304	0.001	0.574958	9.16731	5.74526e-16	7.46091e-15	centrosomal protein 162kDa	Upregulated
BCL2L12	83596	0	14.7917	0.001	0.574703	9.16667	4.35024e-05	0.000130593	BCL2-like 12 (proline rich)	Upregulated
RNF214	257160	0	22.0522	0.001	0.574562	9.16632	1.41853e-07	6.32394e-07	ring finger protein 214	Upregulated
RPGRIP1L	23322	0	59.8357	0.001	0.5744	9.16591	4.47678e-19	8.14947e-18	RPGRIP1-like	Upregulated
METAP1	23173	0	27.2449	0.001	0.573755	9.16429	3.95974e-09	2.1988e-08	methionyl aminopeptidase 1	Upregulated
CDK11B	984	0	29.7214	0.001	0.571737	9.15921	9.46234e-10	5.78475e-09	cyclin-dependent kinase 11B	Upregulated
MPP1	4354	0	19.1634	0.001	0.571483	9.15857	1.21435e-06	4.64512e-06	membrane protein, palmitoylated 1, 55kDa	Upregulated
SPEG	10290	0	21.6501	0.001	0.570941	9.1572	2.90184e-07	1.23429e-06	SPEG complex locus	Upregulated
BRF2	55290	0	19.1045	0.001	0.569724	9.15412	1.21435e-06	4.66262e-06	BRF2, RNA polymerase III transcription initiation factor 50 kDa subunit	Upregulated
TRPC1	7220	0	38.9758	0.001	0.569707	9.15408	1.5083e-12	1.32361e-11	transient receptor potential cation channel, subfamily C, member 1	Upregulated
TRIM6-TRIM34	445372	0	33.2947	0.001	0.569414	9.15333	5.40332e-11	3.89275e-10	TRIM6-TRIM34 readthrough	Upregulated
BRCA1	672	0	53.2021	0.001	0.568713	9.15156	3.28074e-17	4.93644e-16	breast cancer 1, early onset	Upregulated
ARHGAP10	79658	0	29.2703	0.001	0.568403	9.15077	9.46234e-10	5.70773e-09	Rho GTPase activating protein 10	Upregulated
OAS3	4940	0	63.56	0.001	0.568066	9.14991	2.5564e-20	5.30941e-19	2'-5'-oligoadenylate synthetase 3, 100kDa	Upregulated
PAPSS1	9061	0	24.2772	0.001	0.566991	9.14718	3.38976e-08	1.64944e-07	3'-phosphoadenosine 5'-phosphosulfate synthase 1	Upregulated
ORC4	5000	0	61.004	0.001	0.565555	9.14352	1.06979e-19	2.0448e-18	origin recognition complex, subunit 4	Upregulated
ANAPC5	51433	0	24.8475	0.001	0.565404	9.14314	3.38976e-08	1.66267e-07	anaphase promoting complex subunit 5	Upregulated
ERP44	23071	0	46.1054	0.001	0.564264	9.14023	4.91828e-15	5.75194e-14	endoplasmic reticulum protein 44	Upregulated
FLT1	2321	0	28.0581	0.001	0.564251	9.14019	1.93568e-09	1.11641e-08	fms-related tyrosine kinase 1	Upregulated
NDRG4	65009	0	30.1561	0.001	0.564011	9.13958	4.62556e-10	2.91673e-09	NDRG family member 4	Upregulated
RAB18	22931	0	45.6351	0.001	0.561436	9.13298	1.00612e-14	1.14385e-13	RAB18, member RAS oncogene family	Upregulated
PTAR1	375743	0	94.9605	0.001	0.561296	9.13262	5.91238e-30	2.94009e-28	protein prenyltransferase alpha subunit repeat containing 1	Upregulated
CREB3L4	148327	0	15.1089	0.001	0.561098	9.13211	2.12658e-05	6.79406e-05	cAMP responsive element binding protein 3-like 4	Upregulated
ARHGEF25	115557	0	21.1563	0.001	0.560499	9.13057	2.90184e-07	1.24599e-06	Rho guanine nucleotide exchange factor (GEF) 25	Upregulated
HLX	3142	0	21.5826	0.001	0.559063	9.12687	2.90184e-07	1.24643e-06	H2.0-like homeobox	Upregulated
TFAP4	7023	0	20.0572	0.001	0.558823	9.12625	5.93618e-07	2.42138e-06	transcription factor AP-4 (activating enhancer binding protein 4)	Upregulated
RPIA	22934	0	17.1077	0.001	0.558753	9.12607	5.08172e-06	1.77512e-05	ribose 5-phosphate isomerase A	Upregulated
KIAA1704	55425	0	13.3006	0.001	0.55822	9.12469	8.89914e-05	0.000255068	GPALPP motifs containing 1	Upregulated
LHX6	26468	0	32.2587	0.001	0.556781	9.12097	1.10534e-10	7.64796e-10	LIM homeobox 6	Upregulated
SGSM2	9905	0	45.6365	0.001	0.556689	9.12073	1.00612e-14	1.14279e-13	small G protein signaling modulator 2	Upregulated
CACTIN	58509	0	25.0621	0.001	0.556627	9.12057	1.65705e-08	8.48856e-08	cactin, spliceosome C complex subunit	Upregulated
GFER	2671	0	22.79	0.001	0.556571	9.12042	1.41853e-07	6.27138e-07	growth factor, augmenter of liver regeneration	Upregulated
RCOR1	23186	0	53.9651	0.001	0.556288	9.11969	3.28074e-17	4.92433e-16	REST corepressor 1	Upregulated
NOP58	51602	0	18.3906	0.001	0.556262	9.11962	2.48414e-06	9.20027e-06	NOP58 ribonucleoprotein	Upregulated
RAD9A	5883	0	18.4988	0.001	0.555852	9.11856	2.48414e-06	9.20584e-06	RAD9 homolog A (S. pombe)	Upregulated
BMI1	648	0	32.0141	0.001	0.555843	9.11853	1.10534e-10	7.70023e-10	BMI1 proto-oncogene, polycomb ring finger	Upregulated
KIAA0146	23514	0	25.9972	0.001	0.555764	9.11833	1.65705e-08	8.47791e-08	scaffolding protein involved in DNA repair	Upregulated
MGLL	11343	0	39.8762	0.001	0.55575	9.11829	7.37316e-13	6.76638e-12	monoglyceride lipase	Upregulated
TFIP11	24144	0	26.6531	0.001	0.555576	9.11784	8.1003e-09	4.33469e-08	tuftelin interacting protein 11	Upregulated
ELMOD3	84173	0	23.2205	0.001	0.555169	9.11678	6.93434e-08	3.27394e-07	ELMO/CED-12 domain containing 3	Upregulated
NADSYN1	55191	0	22.7595	0.001	0.554457	9.11493	1.41853e-07	6.31474e-07	NAD synthetase 1	Upregulated
KLHL15	80311	0	58.5763	0.001	0.554153	9.11414	9.158e-19	1.62834e-17	kelch-like family member 15	Upregulated
CROCC	9696	0	62.1163	0.001	0.553745	9.11308	5.22954e-20	1.0436e-18	ciliary rootlet coiled-coil, rootletin	Upregulated
TRABD2B	388630	0	65.4122	0.001	0.553604	9.11271	6.10886e-21	1.34406e-19	TraB domain containing 2B	Upregulated
HSD17B13	345275	0	21.162	0.001	0.552753	9.11049	2.90184e-07	1.23044e-06	hydroxysteroid (17-beta) dehydrogenase 13	Upregulated
FAM220A	84792	0	20.5611	0.001	0.551626	9.10755	5.93618e-07	2.42867e-06	family with sequence similarity 220, member A	Upregulated
CASC4	113201	0	35.3219	0.001	0.551623	9.10754	1.29119e-11	1.00478e-10	cancer susceptibility candidate 4	Upregulated
EPS15L1	58513	0	32.961	0.001	0.55116	9.10633	1.10534e-10	7.5964e-10	epidermal growth factor receptor pathway substrate 15-like 1	Upregulated
AKR1A1	10327	0	12.8107	0.001	0.550398	9.10433	0.000182047	0.000498428	aldo-keto reductase family 1, member A1 (aldehyde reductase)	Upregulated
XKR4	114786	0	36.2262	0.001	0.550111	9.10358	6.31186e-12	5.20654e-11	XK, Kell blood group complex subunit-related family, member 4	Upregulated
VTA1	51534	0	29.4569	0.001	0.550067	9.10346	9.46234e-10	5.6993e-09	vesicle (multivesicular body) trafficking 1	Upregulated
TPST1	8460	0	18.9429	0.001	0.549713	9.10253	2.48414e-06	9.1339e-06	tyrosylprotein sulfotransferase 1	Upregulated
GRIPAP1	56850	0	28.0821	0.001	0.549103	9.10093	1.93568e-09	1.13189e-08	GRIP1 associated protein 1	Upregulated
FER	2241	0	27.111	0.001	0.548551	9.09948	3.95974e-09	2.20983e-08	fer (fps/fes related) tyrosine kinase	Upregulated
FAM178A	55719	0	67.2223	0.001	0.548432	9.09917	1.45979e-21	3.40795e-20	family with sequence similarity 178, member A	Upregulated
TTC39B	158219	0	29.6052	0.001	0.545626	9.09177	9.46234e-10	5.76171e-09	tetratricopeptide repeat domain 39B	Upregulated
NFIL3	4783	0	19.1801	0.001	0.545397	9.09116	1.21435e-06	4.73092e-06	nuclear factor, interleukin 3 regulated	Upregulated
PAGR1	79447	0	35.1475	0.001	0.545171	9.09057	1.29119e-11	1.01446e-10	PAXIP1 associated glutamate-rich protein 1	Upregulated
EIF5B	9669	0	42.9957	0.001	0.545092	9.09036	8.61294e-14	8.8243e-13	eukaryotic translation initiation factor 5B	Upregulated
MIB1	57534	0	87.6599	0.001	0.544729	9.08939	8.86346e-28	3.84492e-26	mindbomb E3 ubiquitin protein ligase 1	Upregulated
DLG1	1739	0	45.1947	0.001	0.544694	9.0893	1.00612e-14	1.14491e-13	discs, large homolog 1 (Drosophila)	Upregulated
ZNF579	163033	0	19.7688	0.001	0.544145	9.08785	1.21435e-06	4.69504e-06	zinc finger protein 579	Upregulated
SSH1	54434	0	32.0594	0.001	0.544121	9.08778	1.10534e-10	7.6264e-10	slingshot protein phosphatase 1	Upregulated
ATPAF2	91647	0	14.0595	0.001	0.543554	9.08628	4.35024e-05	0.000130817	ATP synthase mitochondrial F1 complex assembly factor 2	Upregulated
XYLT1	64131	0	85.2907	0.001	0.543144	9.08519	3.70914e-27	1.54333e-25	xylosyltransferase I	Upregulated
SHQ1	55164	0	26.029	0.001	0.54314	9.08518	8.1003e-09	4.31393e-08	SHQ1, H/ACA ribonucleoprotein assembly factor	Upregulated
HEXIM1	10614	0	43.6361	0.001	0.543115	9.08511	4.21034e-14	4.42484e-13	hexamethylene bis-acetamide inducible 1	Upregulated
ERO1L	30001	0	50.2612	0.001	0.542811	9.08431	2.8085e-16	3.77543e-15	ERO1-like (S. cerevisiae)	Upregulated
ZNF277	11179	0	24.4194	0.001	0.542758	9.08417	3.38976e-08	1.65405e-07	zinc finger protein 277	Upregulated
UTP18	51096	0	17.1533	0.001	0.542622	9.0838	5.08172e-06	1.78634e-05	UTP18 small subunit (SSU) processome component homolog (yeast)	Upregulated
ATG4D	84971	0	15.5458	0.001	0.542045	9.08227	2.12658e-05	6.83512e-05	autophagy related 4D, cysteine peptidase	Upregulated
UBA7	7318	0	30.2127	0.001	0.541192	9.08	4.62556e-10	2.92729e-09	ubiquitin-like modifier activating enzyme 7	Upregulated
VPS11	55823	0	29.6481	0.001	0.540708	9.07871	9.46234e-10	5.76745e-09	vacuolar protein sorting 11 homolog (S. cerevisiae)	Upregulated
NIPSNAP3A	25934	0	14.9453	0.001	0.538509	9.07283	4.35024e-05	0.000132577	nipsnap homolog 3A (C. elegans)	Upregulated
SIPA1L1	26037	0	71.2335	0.001	0.53751	9.07015	8.33592e-23	2.212e-21	signal-induced proliferation-associated 1 like 1	Upregulated
TFG	10342	0	16.3862	0.001	0.537127	9.06912	1.03955e-05	3.47739e-05	TRK-fused gene	Upregulated
IER5	51278	0	21.1152	0.001	0.537111	9.06908	2.90184e-07	1.22959e-06	immediate early response 5	Upregulated
PYGO2	90780	0	29.0494	0.001	0.537051	9.06892	9.46234e-10	5.71055e-09	pygopus family PHD finger 2	Upregulated
TMEM184C	55751	0	26.8539	0.001	0.53676	9.06813	8.1003e-09	4.31769e-08	transmembrane protein 184C	Upregulated
RIPK2	8767	0	23.2499	0.001	0.536663	9.06787	6.93434e-08	3.22662e-07	receptor-interacting serine-threonine kinase 2	Upregulated
CDC42EP2	10435	0	18.3079	0.001	0.536268	9.06681	2.48414e-06	9.16973e-06	CDC42 effector protein (Rho GTPase binding) 2	Upregulated
UBE2O	63893	0	48.5593	0.001	0.535839	9.06566	1.17529e-15	1.48526e-14	ubiquitin-conjugating enzyme E2O	Upregulated
ARL2-SNX15	100528018	0	22.0789	0.001	0.535677	9.06522	1.41853e-07	6.39385e-07	ARL2-SNX15 readthrough (NMD candidate)	Upregulated
PRR5	55615	0	20.0278	0.001	0.535578	9.06495	5.93618e-07	2.40137e-06	proline rich 5 (renal)	Upregulated
FBXL12	54850	0	16.7754	0.001	0.535522	9.0648	1.03955e-05	3.49075e-05	F-box and leucine-rich repeat protein 12	Upregulated
KIF20A	10112	0	31.1195	0.001	0.534679	9.06253	2.26114e-10	1.50003e-09	kinesin family member 20A	Upregulated
ARMCX3	51566	0	29.6894	0.001	0.533751	9.06002	9.46234e-10	5.71901e-09	armadillo repeat containing, X-linked 3	Upregulated
RALGAPB	57148	0	76.9938	0.001	0.532798	9.05744	2.32692e-24	7.28011e-23	Ral GTPase activating protein, beta subunit (non-catalytic)	Upregulated
SIK3	23387	0	54.0626	0.001	0.532769	9.05737	1.60376e-17	2.48653e-16	SIK family kinase 3	Upregulated
LGALSL	29094	0	34.333	0.001	0.532677	9.05712	2.64136e-11	1.96903e-10	lectin, galactoside-binding-like	Upregulated
MBNL1	4154	0	46.0255	0.001	0.532411	9.0564	4.91828e-15	5.83563e-14	muscleblind-like splicing regulator 1	Upregulated
CLASP2	23122	0	63.9665	0.001	0.531813	9.05478	2.5564e-20	5.22951e-19	cytoplasmic linker associated protein 2	Upregulated
ECI2	10455	0	12.4797	0.001	0.531661	9.05436	0.000182047	0.000490956	enoyl-CoA delta isomerase 2	Upregulated
C2CD2L	9854	0	30.3084	0.001	0.531357	9.05354	4.62556e-10	2.93945e-09	C2CD2-like	Upregulated
SGSM1	129049	0	51.7228	0.001	0.531144	9.05296	1.37291e-16	1.91285e-15	small G protein signaling modulator 1	Upregulated
CBS	875	0	21.0735	0.001	0.531042	9.05268	2.90184e-07	1.24468e-06	cystathionine-beta-synthase	Upregulated
TIMELESS	8914	0	45.9654	0.001	0.531012	9.0526	1.00612e-14	1.15026e-13	timeless circadian clock	Upregulated
TBCD	6904	0	39.6189	0.001	0.5305	9.05121	7.37316e-13	6.76131e-12	tubulin folding cofactor D	Upregulated
2001-08-01	26523	0	66.6692	0.001	0.530287	9.05063	2.98624e-21	6.76494e-20	argonaute RISC catalytic component 1	Upregulated
ALMS1	7840	0	115.295	0.001	0.529949	9.04971	1.75485e-36	1.43114e-34	Alstrom syndrome 1	Upregulated
FTO	79068	0	38.3537	0.001	0.529816	9.04935	1.5083e-12	1.32171e-11	fat mass and obesity associated	Upregulated
GNAQ	2776	0	56.464	0.001	0.529694	9.04902	3.83238e-18	6.37844e-17	guanine nucleotide binding protein (G protein), q polypeptide	Upregulated
CCAR1	55749	0	40.5331	0.001	0.529014	9.04716	3.6043e-13	3.42325e-12	cell division cycle and apoptosis regulator 1	Upregulated
ZMYND8	23613	0	44.539	0.001	0.528606	9.04605	2.05818e-14	2.23207e-13	zinc finger, MYND-type containing 8	Upregulated
ANP32A	8125	0	21.9233	0.001	0.528446	9.04561	2.90184e-07	1.24293e-06	acidic (leucine-rich) nuclear phosphoprotein 32 family, member A	Upregulated
PPP1R3B	79660	0	49.7676	0.001	0.52821	9.04497	5.74526e-16	7.48475e-15	protein phosphatase 1, regulatory subunit 3B	Upregulated
BORA	79866	0	25.1013	0.001	0.526371	9.03994	1.65705e-08	8.53862e-08	bora, aurora kinase A activator	Upregulated
RAD51B	5890	0	19.5964	0.001	0.524726	9.03542	1.21435e-06	4.66848e-06	RAD51 paralog B	Upregulated
EMX2OS	196047	0	64.2216	0.001	0.5246	9.03507	1.24967e-20	2.65864e-19	EMX2 opposite strand/antisense RNA	Upregulated
IFT52	51098	0	16.1647	0.001	0.523917	9.03319	1.03955e-05	3.48597e-05	intraflagellar transport 52	Upregulated
FAM9B	171483	0	18.4051	0.001	0.523609	9.03235	2.48414e-06	9.10653e-06	family with sequence similarity 9, member B	Upregulated
OSTF1	26578	0	11.4019	0.001	0.5221	9.02818	0.000372406	0.000944958	osteoclast stimulating factor 1	Upregulated
ORMDL3	94103	0	18.9312	0.001	0.522059	9.02807	2.48414e-06	9.09835e-06	ORMDL sphingolipid biosynthesis regulator 3	Upregulated
RACGAP1	29127	0	28.0246	0.001	0.521515	9.02656	1.93568e-09	1.11958e-08	Rac GTPase activating protein 1	Upregulated
TULP4	56995	0	86.1703	0.001	0.520965	9.02504	1.81317e-27	7.72838e-26	tubby like protein 4	Upregulated
FAM221B	392307	0	25.7086	0.001	0.520885	9.02482	1.65705e-08	8.39019e-08	family with sequence similarity 221, member B	Upregulated
PRPF6	24148	0	27.2277	0.001	0.520729	9.02439	3.95974e-09	2.19183e-08	pre-mRNA processing factor 6	Upregulated
LRRC45	201255	0	23.8871	0.001	0.520403	9.02349	6.93434e-08	3.20953e-07	leucine rich repeat containing 45	Upregulated
UFD1L	7353	0	14.9962	0.001	0.519526	9.02105	4.35024e-05	0.000130914	ubiquitin fusion degradation 1 like (yeast)	Upregulated
GMFB	2764	0	35.9457	0.001	0.519277	9.02036	1.29119e-11	1.00928e-10	glia maturation factor, beta	Upregulated
HMG20B	10362	0	13.6651	0.001	0.517521	9.01547	8.89914e-05	0.000255727	high mobility group 20B	Upregulated
ST7-AS1	93653	0	16.4855	0.001	0.517362	9.01503	1.03955e-05	3.46413e-05	ST7 antisense RNA 1	Upregulated
CS	1431	0	25.9565	0.001	0.516908	9.01376	1.65705e-08	8.41457e-08	citrate synthase	Upregulated
AAAS	8086	0	15.1222	0.001	0.516354	9.01222	2.12658e-05	6.70648e-05	achalasia, adrenocortical insufficiency, alacrimia	Upregulated
BICD1	636	0	31.0359	0.001	0.515628	9.01019	2.26114e-10	1.50985e-09	bicaudal D homolog 1 (Drosophila)	Upregulated
C1orf216	127703	0	25.3406	0.001	0.51554	9.00994	1.65705e-08	8.57474e-08	chromosome 1 open reading frame 216	Upregulated
-	101929428	0	24.4568	0.001	0.515223	9.00905	3.38976e-08	1.65934e-07	PTPRD antisense RNA 2 (head to head)	Upregulated
RBBP8	5932	0	28.2902	0.001	0.514678	9.00753	1.93568e-09	1.12597e-08	retinoblastoma binding protein 8	Upregulated
PRICKLE2-AS3	100874243	0	26.7444	0.001	0.514637	9.00741	8.1003e-09	4.33659e-08	PRICKLE2 antisense RNA 3	Upregulated
-	102606465	0	11.4957	0.001	0.514488	9.00699	0.000372406	0.000951471	uncharacterized LOC102606465	Upregulated
FAM81A	145773	0	29.8803	0.001	0.513834	9.00516	9.46234e-10	5.6965e-09	family with sequence similarity 81, member A	Upregulated
ZEB2	9839	0	26.025	0.001	0.513276	9.00359	8.1003e-09	4.36524e-08	zinc finger E-box binding homeobox 2	Upregulated
COX20	116228	0	22.612	0.001	0.513157	9.00326	1.41853e-07	6.28273e-07	COX20 cytochrome c oxidase assembly factor	Upregulated
GPHN	10243	0	36.3291	0.001	0.513076	9.00303	6.31186e-12	5.20303e-11	gephyrin	Upregulated
RPRD2	23248	0	69.3977	0.001	0.512245	9.00069	3.48836e-22	8.58614e-21	regulation of nuclear pre-mRNA domain containing 2	Upregulated
HSPE1-MOB4	100529241	0	36.7222	0.001	0.511326	8.9981	6.31186e-12	5.19953e-11	HSPE1-MOB4 readthrough	Upregulated
ATMIN	23300	0	41.7264	0.001	0.510672	8.99625	1.76192e-13	1.72153e-12	ATM interactor	Upregulated
SCARF2	91179	0	29.8925	0.001	0.509468	8.99285	9.46234e-10	5.70211e-09	scavenger receptor class F, member 2	Upregulated
NAA50	80218	0	52.5705	0.001	0.508854	8.99111	6.7113e-17	9.76211e-16	N(alpha)-acetyltransferase 50, NatE catalytic subunit	Upregulated
MFGE8	4240	0	15.6923	0.001	0.508329	8.98962	2.12658e-05	6.70476e-05	milk fat globule-EGF factor 8 protein	Upregulated
PANK2	80025	0	14.5135	0.001	0.508144	8.98909	4.35024e-05	0.000131334	pantothenate kinase 2	Upregulated
LZTS3	9762	0	35.1104	0.001	0.508076	8.9889	1.29119e-11	1.0067e-10	leucine zipper, putative tumor suppressor family member 3	Upregulated
STK10	6793	0	51.5086	0.001	0.5076	8.98755	1.37291e-16	1.91067e-15	serine/threonine kinase 10	Upregulated
ZNF281	23528	0	40.8952	0.001	0.507405	8.98699	3.6043e-13	3.41529e-12	zinc finger protein 281	Upregulated
LOC400657	400657	0	29.4748	0.001	0.505982	8.98294	9.46234e-10	5.73602e-09	long intergenic non-protein coding RNA 909	Upregulated
RAB3IP	117177	0	80.0216	0.001	0.505629	8.98194	1.32875e-25	4.73896e-24	RAB3A interacting protein	Upregulated
HADHB	3032	0	18.1594	0.001	0.504998	8.98013	2.48414e-06	9.23101e-06	hydroxyacyl-CoA dehydrogenase/3-ketoacyl-CoA thiolase/enoyl-CoA hydratase (trifunctional protein), beta subunit	Upregulated
ZDHHC3	51304	0	106.901	0.001	0.502974	8.97434	1.1009e-33	7.69563e-32	zinc finger, DHHC-type containing 3	Upregulated
VPS39	23339	0	41.1309	0.001	0.502658	8.97343	1.76192e-13	1.71196e-12	vacuolar protein sorting 39 homolog (S. cerevisiae)	Upregulated
ZMYM6	9204	0	43.5397	0.001	0.5025	8.97298	4.21034e-14	4.41725e-13	zinc finger, MYM-type 6	Upregulated
HIVEP2	3097	0	82.1627	0.001	0.501897	8.97125	3.17524e-26	1.21383e-24	human immunodeficiency virus type I enhancer binding protein 2	Upregulated
CYP4V2	285440	0	39.6695	0.001	0.501316	8.96958	7.37316e-13	6.75119e-12	cytochrome P450, family 4, subfamily V, polypeptide 2	Upregulated
KIF2A	3796	0	34.0679	0.001	0.50118	8.96919	2.64136e-11	1.9811e-10	kinesin heavy chain member 2A	Upregulated
C17orf85	55421	0	69.0375	0.001	0.500858	8.96826	3.48836e-22	8.60345e-21	chromosome 17 open reading frame 85	Upregulated
TXNDC12	51060	0	20.2125	0.001	0.500839	8.9682	5.93618e-07	2.40455e-06	thioredoxin domain containing 12 (endoplasmic reticulum)	Upregulated
ZNF75A	7627	0	19.4665	0.001	0.500102	8.96608	1.21435e-06	4.68615e-06	zinc finger protein 75a	Upregulated
SYVN1	84447	0	25.7307	0.001	0.499996	8.96577	1.65705e-08	8.41806e-08	synovial apoptosis inhibitor 1, synoviolin	Upregulated
ROCK1P1	727758	0	20.7375	0.001	0.499864	8.96539	5.93618e-07	2.43111e-06	Rho-associated, coiled-coil containing protein kinase 1 pseudogene 1	Upregulated
SLC12A2	6558	0	57.4907	0.001	0.49982	8.96526	1.87342e-18	3.24611e-17	solute carrier family 12 (sodium/potassium/chloride transporter), member 2	Upregulated
RBM27	54439	0	55.0058	0.001	0.499283	8.96371	7.83978e-18	1.27363e-16	RNA binding motif protein 27	Upregulated
ABI2	10152	0	51.3158	0.001	0.498825	8.96239	1.37291e-16	1.9194e-15	abl-interactor 2	Upregulated
SLC30A1	7779	0	16.9317	0.001	0.498171	8.9605	1.03955e-05	3.4519e-05	solute carrier family 30 (zinc transporter), member 1	Upregulated
B3GNT1	11041	0	17.2875	0.001	0.49802	8.96006	5.08172e-06	1.78685e-05	beta-1,4-glucuronyltransferase 1	Upregulated
KLF3	51274	0	47.0984	0.001	0.497782	8.95937	2.40424e-15	2.93817e-14	Kruppel-like factor 3 (basic)	Upregulated
EPS8L2	64787	0	26.3225	0.001	0.497644	8.95897	8.1003e-09	4.35756e-08	EPS8-like 2	Upregulated
TUBD1	51174	0	20.2676	0.001	0.49722	8.95774	5.93618e-07	2.42462e-06	tubulin, delta 1	Upregulated
ASB16	92591	0	17.7686	0.001	0.496924	8.95688	5.08172e-06	1.77715e-05	ankyrin repeat and SOCS box containing 16	Upregulated
UNG	7374	0	17.1862	0.001	0.49679	8.95649	5.08172e-06	1.78943e-05	uracil-DNA glycosylase	Upregulated
TIGD5	84948	0	20.0129	0.001	0.495892	8.95388	5.93618e-07	2.38637e-06	tigger transposable element derived 5	Upregulated
GATAD2A	54815	0	45.1779	0.001	0.495597	8.95302	1.00612e-14	1.14705e-13	GATA zinc finger domain containing 2A	Upregulated
T1560	100505477	0	17.5708	0.001	0.495361	8.95234	5.08172e-06	1.76204e-05	uncharacterized gene T1560	Upregulated
RAB6A	5870	0	23.7512	0.001	0.49526	8.95204	6.93434e-08	3.23277e-07	RAB6A, member RAS oncogene family	Upregulated
EID2	163126	0	11.609	0.001	0.494925	8.95107	0.000372406	0.000947513	EP300 interacting inhibitor of differentiation 2	Upregulated
CXorf23	256643	0	53.9492	0.001	0.494304	8.94925	3.28074e-17	4.91228e-16	chromosome X open reading frame 23	Upregulated
TRAPPC6B	122553	0	27.8755	0.001	0.494253	8.94911	3.95974e-09	2.1978e-08	trafficking protein particle complex 6B	Upregulated
ARHGAP17	55114	0	27.2757	0.001	0.494251	8.9491	3.95974e-09	2.20681e-08	Rho GTPase activating protein 17	Upregulated
EZH1	2145	0	38.614	0.001	0.494186	8.94891	1.5083e-12	1.32266e-11	enhancer of zeste 1 polycomb repressive complex 2 subunit	Upregulated
RAPSN	5913	0	12.2921	0.001	0.493889	8.94804	0.000182047	0.000489231	receptor-associated protein of the synapse	Upregulated
-	101927550	0	28.2117	0.001	0.492996	8.94543	1.93568e-09	1.13297e-08	uncharacterized LOC101927550	Upregulated
TRIM62	55223	0	31.9555	0.001	0.492825	8.94493	2.26114e-10	1.50411e-09	tripartite motif containing 62	Upregulated
AKT3	10000	0	40.0417	0.001	0.492378	8.94362	3.6043e-13	3.40737e-12	v-akt murine thymoma viral oncogene homolog 3	Upregulated
C1orf226	400793	0	34.213	0.001	0.491732	8.94173	2.64136e-11	1.99332e-10	chromosome 1 open reading frame 226	Upregulated
ATG9A	79065	0	31.7597	0.001	0.491595	8.94133	2.26114e-10	1.49194e-09	autophagy related 9A	Upregulated
EFNB2	1948	0	36.3293	0.001	0.491441	8.94087	6.31186e-12	5.12022e-11	ephrin-B2	Upregulated
ZNF202	7753	0	36.1771	0.001	0.490613	8.93844	6.31186e-12	5.19603e-11	zinc finger protein 202	Upregulated
CDK18	5129	0	25.6648	0.001	0.490522	8.93817	1.65705e-08	8.582e-08	cyclin-dependent kinase 18	Upregulated
SYT1	6857	0	39.711	0.001	0.489947	8.93648	7.37316e-13	6.67623e-12	synaptotagmin I	Upregulated
ABT1	29777	0	18.5104	0.001	0.488872	8.93331	2.48414e-06	9.0929e-06	activator of basal transcription 1	Upregulated
CLK4	57396	0	20.6521	0.001	0.488869	8.9333	5.93618e-07	2.41013e-06	CDC-like kinase 4	Upregulated
TRMT1L	81627	0	36.2561	0.001	0.488559	8.93239	6.31186e-12	5.1544e-11	tRNA methyltransferase 1 homolog (S. cerevisiae)-like	Upregulated
MRRF	92399	0	12.7618	0.001	0.487924	8.93051	0.000182047	0.000487197	mitochondrial ribosome recycling factor	Upregulated
ANKRD13D	338692	0	17.5045	0.001	0.487013	8.92782	5.08172e-06	1.77817e-05	ankyrin repeat domain 13 family, member D	Upregulated
DCP1B	196513	0	17.1033	0.001	0.486108	8.92513	5.08172e-06	1.76906e-05	decapping mRNA 1B	Upregulated
ESRRG	2104	0	40.2784	0.001	0.484694	8.92093	3.6043e-13	3.42591e-12	estrogen-related receptor gamma	Upregulated
PPP1R8	5511	0	19.2372	0.001	0.48374	8.91809	1.21435e-06	4.69207e-06	protein phosphatase 1, regulatory subunit 8	Upregulated
RAB3GAP2	25782	0	59.5998	0.001	0.483717	8.91802	4.47678e-19	8.19827e-18	RAB3 GTPase activating protein subunit 2 (non-catalytic)	Upregulated
ARHGAP5	394	0	78.0151	0.001	0.482961	8.91576	5.56048e-25	1.84841e-23	Rho GTPase activating protein 5	Upregulated
DCAKD	79877	0	16.3298	0.001	0.482855	8.91545	1.03955e-05	3.49459e-05	dephospho-CoA kinase domain containing	Upregulated
ADAP1	11033	0	15.821	0.001	0.482474	8.91431	2.12658e-05	6.7395e-05	ArfGAP with dual PH domains 1	Upregulated
MARCH5	54708	0	31.8624	0.001	0.481873	8.91251	2.26114e-10	1.51897e-09	membrane-associated ring finger (C3HC4) 5	Upregulated
PSIP1	11168	0	27.3953	0.001	0.481566	8.91159	3.95974e-09	2.21286e-08	PC4 and SFRS1 interacting protein 1	Upregulated
ATP6V0A4	50617	0	25.0641	0.001	0.481368	8.911	1.65705e-08	8.55303e-08	ATPase, H+ transporting, lysosomal V0 subunit a4	Upregulated
MCM10	55388	0	36.8382	0.001	0.481002	8.9099	6.31186e-12	5.15785e-11	minichromosome maintenance complex component 10	Upregulated
PPP6C	5537	0	34.3531	0.001	0.480935	8.9097	2.64136e-11	1.96424e-10	protein phosphatase 6, catalytic subunit	Upregulated
GBE1	2632	0	25.0872	0.001	0.480102	8.9072	1.65705e-08	8.56749e-08	glucan (1,4-alpha-), branching enzyme 1	Upregulated
PLD2	5338	0	27.9952	0.001	0.479611	8.90572	3.95974e-09	2.21185e-08	phospholipase D2	Upregulated
CCHCR1	54535	0	21.2028	0.001	0.479525	8.90546	2.90184e-07	1.23601e-06	coiled-coil alpha-helical rod protein 1	Upregulated
ZNF674	641339	0	32.806	0.001	0.479501	8.90539	1.10534e-10	7.71781e-10	zinc finger protein 674	Upregulated
PTX4	390667	0	11.3497	0.001	0.47939	8.90506	0.000372406	0.000938921	pentraxin 4, long	Upregulated
RRP15	51018	0	62.714	0.001	0.479298	8.90478	5.22954e-20	1.05219e-18	ribosomal RNA processing 15 homolog (S. cerevisiae)	Upregulated
UCK1	83549	0	16.7836	0.001	0.479086	8.90414	1.03955e-05	3.4898e-05	uridine-cytidine kinase 1	Upregulated
MAPK8	5599	0	45.5953	0.001	0.478565	8.90257	1.00612e-14	1.13436e-13	mitogen-activated protein kinase 8	Upregulated
CEBPZ	10153	0	26.7397	0.001	0.477395	8.89904	8.1003e-09	4.35373e-08	CCAAT/enhancer binding protein (C/EBP), zeta	Upregulated
GOLGA5	9950	0	23.8191	0.001	0.476743	8.89707	6.93434e-08	3.22049e-07	golgin A5	Upregulated
FUT8	2530	0	36.7972	0.001	0.476238	8.89554	6.31186e-12	5.1786e-11	fucosyltransferase 8 (alpha (1,6) fucosyltransferase)	Upregulated
GMDS	2762	0	11.4366	0.001	0.474948	8.89163	0.000372406	0.000944175	GDP-mannose 4,6-dehydratase	Upregulated
ACTR2	10097	0	31.3058	0.001	0.474907	8.8915	2.26114e-10	1.50329e-09	ARP2 actin-related protein 2 homolog (yeast)	Upregulated
UBALD1	124402	0	11.2703	0.001	0.473345	8.88675	0.000372406	0.000951272	UBA-like domain containing 1	Upregulated
ALAS1	211	0	17.949	0.001	0.472782	8.88503	5.08172e-06	1.78429e-05	5'-aminolevulinate synthase 1	Upregulated
LHX2	9355	0	19.1105	0.001	0.472743	8.88491	1.21435e-06	4.64077e-06	LIM homeobox 2	Upregulated
ARHGEF18	23370	0	41.697	0.001	0.472684	8.88473	1.76192e-13	1.73399e-12	Rho/Rac guanine nucleotide exchange factor (GEF) 18	Upregulated
HCCS	3052	0	17.9226	0.001	0.472087	8.88291	5.08172e-06	1.79252e-05	holocytochrome c synthase	Upregulated
RHNO1	83695	0	15.589	0.001	0.471544	8.88125	2.12658e-05	6.8065e-05	RAD9-HUS1-RAD1 interacting nuclear orphan 1	Upregulated
SPATS2	65244	0	30.0104	0.001	0.471279	8.88044	4.62556e-10	2.92426e-09	spermatogenesis associated, serine-rich 2	Upregulated
CREBL2	1389	0	30.1986	0.001	0.470869	8.87918	4.62556e-10	2.90475e-09	cAMP responsive element binding protein-like 2	Upregulated
FBXL7	23194	0	36.1978	0.001	0.470363	8.87763	6.31186e-12	5.15097e-11	F-box and leucine-rich repeat protein 7	Upregulated
CGN	57530	0	40.5171	0.001	0.470084	8.87677	3.6043e-13	3.39165e-12	cingulin	Upregulated
LPPR4	9890	0	38.4129	0.001	0.470022	8.87658	1.5083e-12	1.32076e-11	lipid phosphate phosphatase-related protein type 4	Upregulated
PTH1R	5745	0	15.752	0.001	0.469749	8.87575	2.12658e-05	6.83691e-05	parathyroid hormone 1 receptor	Upregulated
YTHDF3	253943	0	40.0695	0.001	0.469202	8.87407	3.6043e-13	3.38384e-12	YTH N(6)-methyladenosine RNA binding protein 3	Upregulated
AP1G1	164	0	53.9352	0.001	0.469047	8.87359	3.28074e-17	4.8824e-16	adaptor-related protein complex 1, gamma 1 subunit	Upregulated
-	101929586	0	19.8652	0.001	0.468187	8.87094	1.21435e-06	4.67141e-06	uncharacterized LOC101929586	Upregulated
EED	8726	0	15.7923	0.001	0.467894	8.87004	2.12658e-05	6.74474e-05	embryonic ectoderm development	Upregulated
HIVEP3	59269	0	77.68	0.001	0.4678	8.86975	1.13749e-24	3.67148e-23	human immunodeficiency virus type I enhancer binding protein 3	Upregulated
TNRC18	84629	0	83.2776	0.001	0.467603	8.86914	1.55218e-26	6.08582e-25	trinucleotide repeat containing 18	Upregulated
CFL1P1	142913	0	16.7235	0.001	0.467257	8.86807	1.03955e-05	3.49747e-05	cofilin 1 (non-muscle) pseudogene 1	Upregulated
MICU2	221154	0	15.1872	0.001	0.466985	8.86723	2.12658e-05	6.74999e-05	mitochondrial calcium uptake 2	Upregulated
ANAPC2	29882	0	21.3598	0.001	0.466712	8.86639	2.90184e-07	1.24511e-06	anaphase promoting complex subunit 2	Upregulated
SERPINB1	1992	0	20.8049	0.001	0.464684	8.86011	5.93618e-07	2.42786e-06	serpin peptidase inhibitor, clade B (ovalbumin), member 1	Upregulated
MKRN1	23608	0	20.9407	0.001	0.463011	8.8549	5.93618e-07	2.423e-06	makorin ring finger protein 1	Upregulated
DAB2IP	153090	0	28.8913	0.001	0.462767	8.85414	1.93568e-09	1.11484e-08	DAB2 interacting protein	Upregulated
CCDC132	55610	0	30.9282	0.001	0.462536	8.85342	4.62556e-10	2.9288e-09	coiled-coil domain containing 132	Upregulated
SGK2	10110	0	14.7724	0.001	0.462377	8.85293	4.35024e-05	0.000129544	serum/glucocorticoid regulated kinase 2	Upregulated
NFASC	23114	0	36.834	0.001	0.462377	8.85293	6.31186e-12	5.16475e-11	neurofascin	Upregulated
SLC7A6OS	84138	0	12.653	0.001	0.462087	8.85202	0.000182047	0.000487624	solute carrier family 7, member 6 opposite strand	Upregulated
PAK2	5062	0	47.6655	0.001	0.462055	8.85192	2.40424e-15	2.93524e-14	p21 protein (Cdc42/Rac)-activated kinase 2	Upregulated
PEX19	5824	0	27.9422	0.001	0.461772	8.85104	3.95974e-09	2.22608e-08	peroxisomal biogenesis factor 19	Upregulated
IQCK	124152	0	26.0134	0.001	0.460962	8.8485	8.1003e-09	4.34419e-08	IQ motif containing K	Upregulated
NEDD4	4734	0	45.4478	0.001	0.46049	8.84703	1.00612e-14	1.14173e-13	neural precursor cell expressed, developmentally down-regulated 4, E3 ubiquitin protein ligase	Upregulated
DDX18	8886	0	29.2346	0.001	0.459826	8.84494	9.46234e-10	5.69369e-09	DEAD (Asp-Glu-Ala-Asp) box polypeptide 18	Upregulated
PANK3	79646	0	26.2383	0.001	0.459731	8.84465	8.1003e-09	4.37681e-08	pantothenate kinase 3	Upregulated
HNRNPA3P1	10151	0	23.1284	0.001	0.459201	8.84298	6.93434e-08	3.21439e-07	heterogeneous nuclear ribonucleoprotein A3 pseudogene 1	Upregulated
CSF1R	1436	0	29.1653	0.001	0.459122	8.84273	9.46234e-10	5.73034e-09	colony stimulating factor 1 receptor	Upregulated
SETD8	387893	0	21.1611	0.001	0.456987	8.83601	2.90184e-07	1.22661e-06	SET domain containing (lysine methyltransferase) 8	Upregulated
ELP2	55250	0	18.6312	0.001	0.456133	8.83331	2.48414e-06	9.17527e-06	elongator acetyltransferase complex subunit 2	Upregulated
DUSP5	1847	0	19.3233	0.001	0.453615	8.82532	1.21435e-06	4.64948e-06	dual specificity phosphatase 5	Upregulated
GRIK5	2901	0	25.3169	0.001	0.453357	8.8245	1.65705e-08	8.49924e-08	glutamate receptor, ionotropic, kainate 5	Upregulated
TMEM254	80195	0	15.8726	0.001	0.45308	8.82362	2.12658e-05	6.72208e-05	transmembrane protein 254	Upregulated
C16orf52	730094	0	33.7823	0.001	0.452756	8.82259	5.40332e-11	3.92278e-10	chromosome 16 open reading frame 52	Upregulated
ALG2	85365	0	21.4774	0.001	0.452457	8.82164	2.90184e-07	1.24906e-06	ALG2, alpha-1,3/1,6-mannosyltransferase	Upregulated
BAGE2	85319	0	14.2796	0.001	0.452198	8.82081	4.35024e-05	0.000131366	B melanoma antigen family, member 2	Upregulated
TBR1	10716	0	24.0913	0.001	0.45115	8.81746	3.38976e-08	1.65141e-07	T-box, brain, 1	Upregulated
RNF6	6049	0	25.2101	0.001	0.450358	8.81493	1.65705e-08	8.46022e-08	ring finger protein (C3H2C3 type) 6	Upregulated
NKRF	55922	0	24.5976	0.001	0.449704	8.81283	3.38976e-08	1.66668e-07	NFKB repressing factor	Upregulated
RSAD1	55316	0	19.1797	0.001	0.449355	8.81171	1.21435e-06	4.65385e-06	radical S-adenosyl methionine domain containing 1	Upregulated
YPEL5	51646	0	17.1362	0.001	0.449181	8.81115	5.08172e-06	1.76805e-05	yippee-like 5 (Drosophila)	Upregulated
RAD51	5888	0	16.0967	0.001	0.448477	8.80889	1.03955e-05	3.45472e-05	RAD51 recombinase	Upregulated
TCTN1	79600	0	14.8275	0.001	0.447577	8.80599	4.35024e-05	0.000129386	tectonic family member 1	Upregulated
STXBP6	29091	0	28.3411	0.001	0.447433	8.80553	1.93568e-09	1.12436e-08	syntaxin binding protein 6 (amisyn)	Upregulated
CCZ1B	221960	0	13.8441	0.001	0.447238	8.8049	8.89914e-05	0.000254413	CCZ1 vacuolar protein trafficking and biogenesis associated homolog B (S. cerevisiae)	Upregulated
CDH24	64403	0	25.8189	0.001	0.445931	8.80068	1.65705e-08	8.47083e-08	cadherin 24, type 2	Upregulated
PDE8A	5151	0	27.8686	0.001	0.445663	8.79981	3.95974e-09	2.19282e-08	phosphodiesterase 8A	Upregulated
ACAT2	39	0	11.6373	0.001	0.445558	8.79947	0.000372406	0.000955262	acetyl-CoA acetyltransferase 2	Upregulated
ABCB6	10058	0	22.5449	0.001	0.445381	8.7989	1.41853e-07	6.36804e-07	ATP-binding cassette, sub-family B (MDR/TAP), member 6 (Langereis blood group)	Upregulated
-	101927973	0	33.5074	0.001	0.444952	8.79751	5.40332e-11	3.90424e-10	uncharacterized LOC101927973	Upregulated
PTGR2	145482	0	18.7586	0.001	0.444757	8.79687	2.48414e-06	9.21981e-06	prostaglandin reductase 2	Upregulated
SDCBP2-AS1	100507495	0	16.9687	0.001	0.444033	8.79452	1.03955e-05	3.49651e-05	SDCBP2 antisense RNA 1	Upregulated
HINFP	25988	0	17.5653	0.001	0.442261	8.78875	5.08172e-06	1.76404e-05	histone H4 transcription factor	Upregulated
IPO8	10526	0	35.0741	0.001	0.441925	8.78766	1.29119e-11	1.00735e-10	importin 8	Upregulated
ZC3H12B	340554	0	53.9538	0.001	0.441273	8.78553	3.28074e-17	4.8943e-16	zinc finger CCCH-type containing 12B	Upregulated
ATP11C	286410	0	44.5538	0.001	0.440233	8.78212	2.05818e-14	2.25002e-13	ATPase, class VI, type 11C	Upregulated
TMEM145	284339	0	13.048	0.001	0.43946	8.77959	8.89914e-05	0.00025194	transmembrane protein 145	Upregulated
AIFM1	9131	0	14.6643	0.001	0.439448	8.77955	4.35024e-05	0.000132313	apoptosis-inducing factor, mitochondrion-associated, 1	Upregulated
CPLX1	10815	0	16.1597	0.001	0.439302	8.77907	1.03955e-05	3.49844e-05	complexin 1	Upregulated
RFK	55312	0	19.9026	0.001	0.439077	8.77833	1.21435e-06	4.6773e-06	riboflavin kinase	Upregulated
MYCN	4613	0	20.0614	0.001	0.437858	8.77432	5.93618e-07	2.41334e-06	v-myc avian myelocytomatosis viral oncogene neuroblastoma derived homolog	Upregulated
DTL	51514	0	33.8453	0.001	0.437211	8.77219	5.40332e-11	3.90886e-10	denticleless E3 ubiquitin protein ligase homolog (Drosophila)	Upregulated
NBEAL1	65065	0	66.5901	0.001	0.437095	8.7718	2.98624e-21	6.79009e-20	neurobeachin-like 1	Upregulated
TCTN3	26123	0	20.0545	0.001	0.436906	8.77118	5.93618e-07	2.41896e-06	tectonic family member 3	Upregulated
COTL1	23406	0	13.8076	0.001	0.436786	8.77078	8.89914e-05	0.000255308	coactosin-like F-actin binding protein 1	Upregulated
AURKA	6790	0	16.3896	0.001	0.436553	8.77001	1.03955e-05	3.46224e-05	aurora kinase A	Upregulated
ZFP64	55734	0	21.9477	0.001	0.436388	8.76947	2.90184e-07	1.2412e-06	ZFP64 zinc finger protein	Upregulated
STUB1	10273	0	12.0024	0.001	0.43618	8.76878	0.000182047	0.000496872	STIP1 homology and U-box containing protein 1, E3 ubiquitin protein ligase	Upregulated
CA2	760	0	12.0939	0.001	0.435238	8.76566	0.000182047	0.000490416	carbonic anhydrase II	Upregulated
CBX4	8535	0	19.3392	0.001	0.435058	8.76506	1.21435e-06	4.6292e-06	chromobox homolog 4	Upregulated
STAM	8027	0	28.3211	0.001	0.434854	8.76439	1.93568e-09	1.11379e-08	signal transducing adaptor molecule (SH3 domain and ITAM motif) 1	Upregulated
ZNF585A	199704	0	49.0932	0.001	0.434646	8.7637	5.74526e-16	7.50072e-15	zinc finger protein 585A	Upregulated
SUPT20H	55578	0	21.1283	0.001	0.434612	8.76358	2.90184e-07	1.22874e-06	suppressor of Ty 20 homolog (S. cerevisiae)	Upregulated
POLA1	5422	0	39.8211	0.001	0.434567	8.76343	7.37316e-13	6.721e-12	polymerase (DNA directed), alpha 1, catalytic subunit	Upregulated
BRSK2	9024	0	29.8196	0.001	0.434161	8.76209	9.46234e-10	5.75026e-09	BR serine/threonine kinase 2	Upregulated
SPRYD7	57213	0	21.4542	0.001	0.433946	8.76137	2.90184e-07	1.24862e-06	SPRY domain containing 7	Upregulated
IL17RC	84818	0	17.3748	0.001	0.433876	8.76114	5.08172e-06	1.77563e-05	interleukin 17 receptor C	Upregulated
CASP8AP2	9994	0	48.4402	0.001	0.433455	8.75974	1.17529e-15	1.49297e-14	caspase 8 associated protein 2	Upregulated
LRRC8D	55144	0	27.5518	0.001	0.432783	8.7575	3.95974e-09	2.23018e-08	leucine rich repeat containing 8 family, member D	Upregulated
SHANK3	85358	0	51.7455	0.001	0.432754	8.7574	1.37291e-16	1.92822e-15	SH3 and multiple ankyrin repeat domains 3	Upregulated
B4GALT4	8702	0	16.5097	0.001	0.432377	8.75615	1.03955e-05	3.45284e-05	UDP-Gal:betaGlcNAc beta 1,4- galactosyltransferase, polypeptide 4	Upregulated
TSNAX	7257	0	19.303	0.001	0.432277	8.75581	1.21435e-06	4.71291e-06	translin-associated factor X	Upregulated
POLQ	10721	0	63.8528	0.001	0.432079	8.75515	2.5564e-20	5.3275e-19	polymerase (DNA directed), theta	Upregulated
SNX11	29916	0	16.723	0.001	0.431863	8.75443	1.03955e-05	3.49267e-05	sorting nexin 11	Upregulated
NPEPL1	79716	0	15.2255	0.001	0.431703	8.7539	2.12658e-05	6.83332e-05	aminopeptidase-like 1	Upregulated
INADL	10207	0	61.6738	0.001	0.431199	8.75221	1.06979e-19	2.05121e-18	InaD-like (Drosophila)	Upregulated
PHKB	5257	0	40.5313	0.001	0.430599	8.7502	3.6043e-13	3.38124e-12	phosphorylase kinase, beta	Upregulated
C12orf73	728568	0	12.3452	0.001	0.430195	8.74885	0.000182047	0.000491715	chromosome 12 open reading frame 73	Upregulated
UHRF1BP1	54887	0	69.8737	0.001	0.430105	8.74855	3.48836e-22	8.63828e-21	UHRF1 binding protein 1	Upregulated
CMTM6	54918	0	24.399	0.001	0.430043	8.74834	3.38976e-08	1.6501e-07	CKLF-like MARVEL transmembrane domain containing 6	Upregulated
GUF1	60558	0	30.4962	0.001	0.429574	8.74676	4.62556e-10	2.9364e-09	GUF1 GTPase homolog (S. cerevisiae)	Upregulated
NUPL2	11097	0	12.8427	0.001	0.427692	8.74043	0.000182047	0.000494554	nucleoporin like 2	Upregulated
[truncated: 2,120 more rows]
