# Supplementary material for: Downregulated genes by silencing MYC pathway identified with RNA-SEQ analysis as potential prognostic biomarkers in gastric adenocarcinoma
Source: Aging (Albany NY). 2020 Dec 22;12(24):24651–70. doi: 10.18632/aging.202260 (PMC7803532; doi:10.18632/aging.202260)
Supplement: Supplementary Table 3 [file aging-12-202260-s003.xlsx]

## Sheet: sheet
Supplementary Table 3. Clinical-pathological variables and gene expression of TTLL12, CDKN3 and CDC16 in gastric cancer.
	TTLL12			CDKN3			CDC16			PTPRA			UBE2T			MZT2B
	RQ mRNA TTLL12	western TTLL12		RQ mRNA CDKN3	western CDKN3		RQ mRNA CDC16	western CDC16		RQ mRNA PTPRA	western PTPRA		RQ mRNA UBE2T	western UBE2T		RQ mRNA MZT2B	western MZT2B
wild type ACP02 (diffuse type) Vs MNP01 (normal mucosa)	2.61697	2.37336		2.32981	2.2884		2.14362	2.02743		1.06934	1.0657		1.42495	1.37369		1.17857	1.17601
wild type ACP02 Vs MN01	2.46727	2.41474		2.37223	2.2897		2.19815	2.0355		1.0633	1.051		1.3427	1.22821		1.15973	1.15559
wild type ACP02 Vs MN01	2.57634	2.46531		2.32976	2.2936		2.18047	2.1232		1.07833	1.068		1.28682	1.25622		1.24005	1.17809
wild type ACP03 (intestinal type) Vs MNP01 (normal mucosa)	1.35321	1.36832		1.39074	1.39559		1.49152	1.49298		2.5353	2.4478		2.28778	2.25469		1.97001	1.9113
wild type ACP03 Vs MNP01	1.36406	1.3833		1.38471	1.38153		1.49075	1.49692		2.5736	2.4268		2.23863	2.21621		1.91089	1.85445
wild type ACP03 Vs MNP01	1.35543	1.35585		1.42266	1.40165		1.48321	1.4832		2.6775	2.4974		2.24835	2.20849		1.94696	2.04826
	TTLL12			CDKN3			CDC16			PTPRA			UBE2T			MZT2B
	RQ mRNA TTLL12	western TTLL12		RQ mRNA CDKN3	western CDKN3		RQ mRNA CDC16	western CDC16		RQ mRNA PTPRA	western PTPRA		RQ mRNA UBE2T	western UBE2T		RQ mRNA MZT2B	western MZT2B
ACP02 silencing MYC Vs wild type ACP02 (diffuse type)	0.516972	0.502734		0.558104	0.5584		0.591436	0.590274		0.6369	0.636		0.672193	0.677369		0.785669	0.760141
ACP02 silencing MYC Vs wild type ACP02	0.506727	0.503147		0.55223	0.5597		0.591981	0.590355		0.636	0.6351		0.686543	0.672821		0.725813	0.705884
ACP02 silencing MYC Vs wild type ACP02	0.502763	0.503465		0.557618	0.5536		0.592805	0.591232		0.6378	0.6368		0.68682	0.679622		0.704005	0.780941
ACP03 silencing MYC Vs wild type ACP03 (intestinal type)	0.78109	0.773476		0.803489	0.792322		0.827822	0.82911		0.503625	0.493009		0.557327	0.56644		0.62035	0.6192
ACP03 silencing MYC Vs wild type ACP03	0.76656	0.777589		0.804967	0.791755		0.823981	0.829359		0.491711	0.489112		0.563183	0.583206		0.62065	0.6144
ACP03 silencing MYC Vs wild type ACP03	0.769999	0.77702		0.800955	0.79087		0.838658	0.809462		0.491336	0.485334		0.569717	0.565363		0.621016	0.61556
