# Supplementary material for: Downregulated genes by silencing MYC pathway identified with RNA-SEQ analysis as potential prognostic biomarkers in gastric adenocarcinoma
Source: Aging (Albany NY). 2020 Dec 22;12(24):24651–70. doi: 10.18632/aging.202260 (PMC7803532; doi:10.18632/aging.202260)
Supplement: Supplementary Table 4 [file aging-12-202260-s004.xlsx]

## Sheet: Hallmark gene sets (ACP02)
Supplementary Table 4. Clinicopathological variables and gene expression of PTPRA, MZT2B and UBE2T in gastric cancer.
Description	setSize	enrichmentScore	NES	pvalue	p.adjust	qvalues	rank	leading_edge
HALLMARK_MTORC1_SIGNALING	171	-0.38918	-1.42984	0.012987	0.324675	0.321258	1767	tags=21%, list=15%, signal=18%
HALLMARK_OXIDATIVE_PHOSPHORYLATION	170	-0.376358	-1.38463	0.012987	0.324675	0.321258	2181	tags=28%, list=18%, signal=23%
HALLMARK_MYC_TARGETS_V2	53	-0.462192	-1.46482	0.030303	0.505051	0.499734	1629	tags=23%, list=14%, signal=20%
HALLMARK_UV_RESPONSE_UP	103	-0.382715	-1.34776	0.0512821	0.641026	0.634278	2528	tags=29%, list=21%, signal=23%
HALLMARK_XENOBIOTIC_METABOLISM	124	-0.374922	-1.30928	0.0810811	0.666667	0.659649	3304	tags=36%, list=28%, signal=27%
HALLMARK_HEDGEHOG_SIGNALING	19	-0.548059	-1.43936	0.0869565	0.666667	0.659649	2127	tags=37%, list=18%, signal=30%
HALLMARK_E2F_TARGETS	182	-0.33958	-1.2529	0.115385	0.666667	0.659649	2299	tags=23%, list=19%, signal=19%
HALLMARK_MYC_TARGETS_V1	189	-0.339542	-1.25123	0.115385	0.666667	0.659649	1684	tags=14%, list=14%, signal=12%
HALLMARK_KRAS_SIGNALING_UP	93	-0.371041	-1.27301	0.12	0.666667	0.659649	2680	tags=29%, list=22%, signal=23%
HALLMARK_ALLOGRAFT_REJECTION	108	-0.351287	-1.22454	0.146667	0.733333	0.725614	3345	tags=36%, list=28%, signal=26%
HALLMARK_PROTEIN_SECRETION	75	-0.360801	-1.20542	0.173913	0.767544	0.759464	2079	tags=19%, list=17%, signal=16%
HALLMARK_APICAL_JUNCTION	132	0.282097	1.15343	0.192308	0.767544	0.759464	2142	tags=21%, list=18%, signal=18%
HALLMARK_BILE_ACID_METABOLISM	62	-0.384196	-1.20942	0.203125	0.767544	0.759464	3575	tags=35%, list=30%, signal=25%
HALLMARK_ESTROGEN_RESPONSE_LATE	115	-0.322097	-1.12416	0.246753	0.767544	0.759464	2703	tags=27%, list=23%, signal=21%
HALLMARK_KRAS_SIGNALING_DN	61	-0.368784	-1.1757	0.257576	0.767544	0.759464	3303	tags=36%, list=28%, signal=26%
HALLMARK_CHOLESTEROL_HOMEOSTASIS	56	-0.365106	-1.15432	0.265625	0.767544	0.759464	2434	tags=29%, list=20%, signal=23%
HALLMARK_HEME_METABOLISM	136	-0.305229	-1.08989	0.272727	0.767544	0.759464	2513	tags=26%, list=21%, signal=21%
HALLMARK_MITOTIC_SPINDLE	168	-0.297145	-1.08775	0.276316	0.767544	0.759464	2219	tags=20%, list=18%, signal=17%
HALLMARK_INTERFERON_ALPHA_RESPONSE	60	-0.361172	-1.14545	0.292308	0.769231	0.761134	1763	tags=32%, list=15%, signal=27%
HALLMARK_G2M_CHECKPOINT	176	0.25247	1.05339	0.32	0.783208	0.774964	1779	tags=16%, list=15%, signal=14%

## Sheet: Hallmark gene sets (ACP03)
Description	setSize	enrichmentScore	NES	pvalue	p.adjust	qvalues	rank	leading_edge
HALLMARK_G2M_CHECKPOINT	177	0.44644	1.50195	0.0010101	0.0505051	0.0457204	2561	tags=29%, list=21%, signal=23%
HALLMARK_E2F_TARGETS	178	0.416448	1.40147	0.00202224	0.0505561	0.0457666	2719	tags=30%, list=22%, signal=24%
HALLMARK_ADIPOGENESIS	149	0.413139	1.37525	0.00406504	0.0677507	0.0613322	2459	tags=32%, list=20%, signal=26%
HALLMARK_MITOTIC_SPINDLE	175	0.396954	1.33489	0.00807265	0.0808898	0.0732265	2878	tags=28%, list=24%, signal=22%
HALLMARK_OXIDATIVE_PHOSPHORYLATION	172	0.397017	1.33305	0.00808898	0.0808898	0.0732265	2443	tags=28%, list=20%, signal=23%
HALLMARK_PROTEIN_SECRETION	82	0.446468	1.42155	0.0106157	0.0884643	0.0800834	3284	tags=34%, list=27%, signal=25%
HALLMARK_KRAS_SIGNALING_DN	67	-0.392249	-1.6446	0.0135135	0.0965251	0.0873806	1457	tags=31%, list=12%, signal=28%
HALLMARK_ESTROGEN_RESPONSE_LATE	129	-0.246557	-1.13975	0.0588235	0.367647	0.332817	943	tags=18%, list=8%, signal=17%
HALLMARK_PI3K_AKT_MTOR_SIGNALING	79	0.38585	1.2271	0.0996819	0.553788	0.501324	3093	tags=28%, list=25%, signal=21%
HALLMARK_MYC_TARGETS_V1	194	0.344079	1.1632	0.118952	0.556766	0.50402	2098	tags=16%, list=17%, signal=14%
HALLMARK_MTORC1_SIGNALING	168	0.343894	1.15366	0.136502	0.556766	0.50402	1798	tags=20%, list=15%, signal=17%
HALLMARK_UV_RESPONSE_DN	108	0.363772	1.18943	0.137967	0.556766	0.50402	2670	tags=27%, list=22%, signal=21%
HALLMARK_UNFOLDED_PROTEIN_RESPONSE	97	0.36433	1.18097	0.149425	0.556766	0.50402	3261	tags=29%, list=27%, signal=21%
HALLMARK_APICAL_JUNCTION	130	0.347874	1.14952	0.162887	0.556766	0.50402	4563	tags=36%, list=37%, signal=23%
HALLMARK_DNA_REPAIR	121	0.351405	1.15698	0.170455	0.556766	0.50402	1943	tags=26%, list=16%, signal=22%
HALLMARK_INTERFERON_ALPHA_RESPONSE	60	0.382561	1.1774	0.181522	0.556766	0.50402	3134	tags=38%, list=26%, signal=29%
HALLMARK_EPITHELIAL_MESENCHYMAL_TRANSITION	127	0.343687	1.13628	0.1893	0.556766	0.50402	3011	tags=22%, list=25%, signal=17%
HALLMARK_PANCREAS_BETA_CELLS	16	-0.392866	-1.19477	0.201717	0.560324	0.507241	1298	tags=31%, list=11%, signal=28%
HALLMARK_HYPOXIA	136	0.333344	1.10517	0.249744	0.64834	0.586919	3939	tags=30%, list=32%, signal=21%
HALLMARK_IL2_STAT5_SIGNALING	129	0.332621	1.09837	0.271694	0.64834	0.586919	3751	tags=30%, list=31%, signal=21%

## Sheet: KEGG (ACP02)
ID	Description	setSize	enrichmentScore	NES	pvalue	p.adjust	qvalues	rank	leading_edge
hsa00970	Aminoacyl-tRNA biosynthesis	34	-0.597236	-1.75849	0.00101124	0.298331	0.288708	747	tags=32%, list=6%, signal=30%
hsa05140	Leishmaniasis	36	-0.563141	-1.67635	0.00272704	0.298331	0.288708	3264	tags=47%, list=27%, signal=34%
hsa04940	Type I diabetes mellitus	19	-0.665712	-1.73261	0.00288708	0.298331	0.288708	3207	tags=63%, list=27%, signal=46%
hsa05164	Influenza A	104	-0.426998	-1.49661	0.00402984	0.311891	0.30183	3345	tags=38%, list=28%, signal=27%
hsa00513	Various types of N-glycan biosynthesis	29	-0.579695	-1.65393	0.0050305	0.311891	0.30183	1639	tags=34%, list=14%, signal=30%
hsa04612	Antigen processing and presentation	42	-0.509143	-1.55899	0.0089557	0.393304	0.380617	2396	tags=24%, list=20%, signal=19%
hsa05332	Graft-versus-host disease	17	-0.645391	-1.63663	0.00964962	0.393304	0.380617	3207	tags=47%, list=27%, signal=35%
hsa00860	Porphyrin and chlorophyll metabolism	20	-0.615833	-1.6214	0.0101498	0.393304	0.380617	1753	tags=35%, list=15%, signal=30%
hsa04920	Adipocytokine signaling pathway	43	-0.480139	-1.47602	0.0208543	0.526062	0.509093	2422	tags=28%, list=20%, signal=22%
hsa04213	Longevity regulating pathway - multiple species	42	-0.481607	-1.47467	0.0214581	0.526062	0.509093	2433	tags=33%, list=20%, signal=27%
hsa01200	Carbon metabolism	79	-0.414896	-1.40345	0.0217208	0.526062	0.509093	1604	tags=23%, list=13%, signal=20%
hsa04714	Thermogenesis	155	-0.363318	-1.33053	0.0217792	0.526062	0.509093	2487	tags=29%, list=21%, signal=23%
hsa04932	Non-alcoholic fatty liver disease	107	-0.385925	-1.35741	0.0252648	0.526062	0.509093	2544	tags=36%, list=21%, signal=29%
hsa05145	Toxoplasmosis	73	-0.416295	-1.39238	0.0270409	0.526062	0.509093	3298	tags=33%, list=27%, signal=24%
hsa04211	Longevity regulating pathway	63	-0.428353	-1.40231	0.0282764	0.526062	0.509093	2433	tags=29%, list=20%, signal=23%
hsa03010	Ribosome	125	-0.370002	-1.32501	0.0307809	0.526062	0.509093	1740	tags=42%, list=14%, signal=37%
hsa05330	Allograft rejection	19	-0.579336	-1.50781	0.0310757	0.526062	0.509093	3207	tags=53%, list=27%, signal=39%
hsa05320	Autoimmune thyroid disease	19	-0.578831	-1.50649	0.0314278	0.526062	0.509093	3207	tags=53%, list=27%, signal=39%
hsa04914	Progesterone-mediated oocyte maturation	59	-0.428459	-1.38866	0.0345916	0.526062	0.509093	2433	tags=29%, list=20%, signal=23%
hsa05168	Herpes simplex virus 1 infection	283	-0.321591	-1.23785	0.0368781	0.526062	0.509093	2984	tags=29%, list=25%, signal=22%
hsa01523	Antifolate resistance	24	-0.53413	-1.46453	0.038008	0.526062	0.509093	935	tags=25%, list=8%, signal=23%
hsa04216	Ferroptosis	31	-0.498045	-1.43999	0.0382626	0.526062	0.509093	3033	tags=29%, list=25%, signal=22%
hsa04921	Oxytocin signaling pathway	77	-0.397677	-1.34027	0.0431737	0.526062	0.509093	2488	tags=26%, list=21%, signal=21%
hsa04120	Ubiquitin mediated proteolysis	112	-0.368357	-1.3026	0.0449159	0.526062	0.509093	2473	tags=24%, list=21%, signal=19%
hsa05110	Vibrio cholerae infection	38	-0.463831	-1.39453	0.0474412	0.526062	0.509093	682	tags=18%, list=6%, signal=17%
hsa05321	Inflammatory bowel disease	25	-0.514219	-1.42255	0.0507897	0.526062	0.509093	3207	tags=44%, list=27%, signal=32%
hsa05235	PD-L1 expression and PD-1 checkpoint pathway in cancer	57	-0.41857	-1.34944	0.0511106	0.526062	0.509093	3264	tags=40%, list=27%, signal=30%
hsa00030	Pentose phosphate pathway	21	-0.538861	-1.43459	0.0513875	0.526062	0.509093	2635	tags=43%, list=22%, signal=34%
hsa05166	Human T-cell leukemia virus 1 infection	145	-0.347696	-1.26472	0.0531212	0.526062	0.509093	2433	tags=26%, list=20%, signal=21%
hsa05012	Parkinson disease	180	-0.33587	-1.24749	0.0532644	0.526062	0.509093	2487	tags=22%, list=21%, signal=18%
hsa03015	mRNA surveillance pathway	79	-0.388675	-1.31475	0.0539843	0.526062	0.509093	2287	tags=25%, list=19%, signal=21%
hsa04218	Cellular senescence	121	-0.358171	-1.27798	0.0543032	0.526062	0.509093	2107	tags=21%, list=18%, signal=18%
hsa04930	Type II diabetes mellitus	23	-0.519913	-1.41238	0.0572277	0.537594	0.520252	2892	tags=39%, list=24%, signal=30%
hsa04660	T cell receptor signaling pathway	59	-0.408339	-1.32345	0.0621564	0.56672	0.548439	3226	tags=34%, list=27%, signal=25%
hsa00770	Pantothenate and CoA biosynthesis	11	-0.632453	-1.43661	0.0654843	0.574864	0.55632	3270	tags=64%, list=27%, signal=46%
hsa00140	Steroid hormone biosynthesis	17	0.514548	1.4189	0.0667583	0.574864	0.55632	2776	tags=47%, list=23%, signal=36%
hsa03040	Spliceosome	127	-0.347199	-1.24554	0.0727986	0.583506	0.564683	2822	tags=33%, list=24%, signal=26%
hsa04066	HIF-1 signaling pathway	76	-0.381773	-1.28414	0.0731475	0.583506	0.564683	941	tags=14%, list=8%, signal=13%
hsa04530	Tight junction	116	-0.352544	-1.25186	0.0734088	0.583506	0.564683	3566	tags=31%, list=30%, signal=22%
hsa01522	Endocrine resistance	71	-0.384699	-1.28153	0.0783574	0.585875	0.566976	2464	tags=28%, list=21%, signal=23%

## Sheet: KEGG (ACP03)
ID	Description	setSize	enrichmentScore	NES	pvalue	p.adjust	qvalues	rank	leading_edge
hsa04714	Thermogenesis	165	0.441138	1.48193	0.000234028	0.0504718	0.0470315	3541	tags=38%, list=29%, signal=28%
hsa05012	Parkinson disease	187	0.428173	1.44675	0.000435531	0.0504718	0.0470315	2380	tags=25%, list=19%, signal=21%
hsa03050	Proteasome	39	0.581946	1.69213	0.000496444	0.0504718	0.0470315	1511	tags=33%, list=12%, signal=29%
hsa04120	Ubiquitin mediated proteolysis	119	0.458385	1.50939	0.000672801	0.0513011	0.0478043	2791	tags=35%, list=23%, signal=28%
hsa04110	Cell cycle	104	0.465402	1.517	0.000972742	0.0593373	0.0552927	3054	tags=36%, list=25%, signal=27%
hsa04932	Non-alcoholic fatty liver disease	108	0.455387	1.48858	0.00157441	0.0800325	0.0745773	2841	tags=35%, list=23%, signal=27%
hsa00190	Oxidative phosphorylation	96	0.453639	1.46911	0.00334719	0.145842	0.135901	2380	tags=34%, list=19%, signal=28%
hsa04130	SNARE interactions in vesicular transport	28	0.5836	1.60594	0.00426514	0.157855	0.147095	3284	tags=64%, list=27%, signal=47%
hsa04914	Progesterone-mediated oocyte maturation	67	0.478501	1.49446	0.00489107	0.157855	0.147095	2366	tags=39%, list=19%, signal=31%
hsa04657	IL-17 signaling pathway	44	0.520366	1.5405	0.00517556	0.157855	0.147095	2953	tags=41%, list=24%, signal=31%
hsa02010	ABC transporters	25	-0.499951	-1.68362	0.00679203	0.175172	0.163232	795	tags=28%, list=6%, signal=26%
hsa00630	Glyoxylate and dicarboxylate metabolism	22	0.605255	1.59097	0.00689203	0.175172	0.163232	2763	tags=55%, list=23%, signal=42%
hsa04722	Neurotrophin signaling pathway	91	0.44343	1.42933	0.00772956	0.17572	0.163742	2976	tags=30%, list=24%, signal=23%
hsa05010	Alzheimer disease	255	0.37753	1.29053	0.0082295	0.17572	0.163742	2731	tags=26%, list=22%, signal=21%
hsa04723	Retrograde endocannabinoid signaling	82	0.449317	1.43402	0.00905151	0.17572	0.163742	3651	tags=45%, list=30%, signal=32%
hsa05016	Huntington disease	217	0.383644	1.3041	0.00921808	0.17572	0.163742	2380	tags=24%, list=19%, signal=20%
hsa05212	Pancreatic cancer	62	0.470701	1.45754	0.0101087	0.181361	0.168999	1623	tags=27%, list=13%, signal=24%
hsa05017	Spinocerebellar ataxia	88	0.436756	1.40287	0.0126081	0.213638	0.199076	2365	tags=31%, list=19%, signal=25%
hsa04114	Oocyte meiosis	91	0.432367	1.39367	0.0134606	0.216079	0.20135	3566	tags=38%, list=29%, signal=27%
hsa05170	Human immunodeficiency virus 1 infection	145	0.39803	1.32733	0.0159934	0.2439	0.227275	4467	tags=39%, list=37%, signal=25%
hsa05418	Fluid shear stress and atherosclerosis	90	0.42824	1.37888	0.0173147	0.251476	0.234335	4927	tags=43%, list=40%, signal=26%
hsa04668	TNF signaling pathway	68	0.447136	1.39877	0.0199656	0.269013	0.250676	4467	tags=43%, list=37%, signal=27%
hsa03015	mRNA surveillance pathway	77	0.43639	1.38381	0.0205849	0.269013	0.250676	1730	tags=27%, list=14%, signal=24%
hsa04721	Synaptic vesicle cycle	44	0.484914	1.43555	0.0217624	0.269013	0.250676	1211	tags=23%, list=10%, signal=21%
hsa00051	Fructose and mannose metabolism	23	0.562443	1.49144	0.0220502	0.269013	0.250676	3471	tags=39%, list=28%, signal=28%
hsa00565	Ether lipid metabolism	23	0.557776	1.47907	0.0249542	0.282531	0.263273	3554	tags=57%, list=29%, signal=40%
hsa05014	Amyotrophic lateral sclerosis	253	0.362813	1.23991	0.0250219	0.282531	0.263273	2380	tags=22%, list=19%, signal=18%
hsa00564	Glycerophospholipid metabolism	59	0.452608	1.39256	0.0259373	0.282531	0.263273	2851	tags=42%, list=23%, signal=33%
hsa03430	Mismatch repair	17	0.592514	1.47727	0.0294482	0.304074	0.283347	2596	tags=41%, list=21%, signal=32%
hsa03018	RNA degradation	62	0.444412	1.37613	0.0299089	0.304074	0.283347	3314	tags=42%, list=27%, signal=31%
hsa04340	Hedgehog signaling pathway	33	0.503255	1.42446	0.0332304	0.326944	0.304659	4111	tags=52%, list=34%, signal=34%
hsa00071	Fatty acid degradation	31	-0.403695	-1.42877	0.0345466	0.329272	0.306828	364	tags=23%, list=3%, signal=22%
hsa00532	Glycosaminoglycan biosynthesis - chondroitin sulfate / dermatan sulfate	14	-0.531489	-1.53023	0.039123	0.361355	0.336724	1882	tags=50%, list=15%, signal=42%
hsa05110	Vibrio cholerae infection	41	0.473116	1.38607	0.0402822	0.361355	0.336724	3477	tags=41%, list=28%, signal=30%
hsa04912	GnRH signaling pathway	58	0.439267	1.34923	0.0432287	0.376707	0.35103	3566	tags=34%, list=29%, signal=25%
hsa04713	Circadian entrainment	48	0.450358	1.34944	0.0513846	0.430807	0.401442	3651	tags=42%, list=30%, signal=29%
hsa04142	Lysosome	102	0.393052	1.27951	0.0536616	0.430807	0.401442	2968	tags=29%, list=24%, signal=22%
hsa04971	Gastric acid secretion	43	0.458348	1.35258	0.0536743	0.430807	0.401442	3566	tags=33%, list=29%, signal=23%
hsa00790	Folate biosynthesis	15	0.58331	1.41432	0.0556189	0.434968	0.40532	3147	tags=40%, list=26%, signal=30%
hsa05135	Yersinia infection	88	0.399158	1.2821	0.0598886	0.45665	0.425524	2951	tags=28%, list=24%, signal=22%

## Sheet: GO (ACP02)
	ID	Description	setSize	enrichmentScore	NES	pvalue	p.adjust	qvalues	rank	leading_edge
Cellular component	GO:0005740	mitochondrial envelope	495	-0.341649	-1.35564	0.00106383	0.0320988	0.0307165	2552	tags=30%, list=21%, signal=24%
Cellular component	GO:0031966	mitochondrial membrane	476	-0.347069	-1.3743	0.00106724	0.0320988	0.0307165	2707	tags=31%, list=23%, signal=25%
Cellular component	GO:0019866	organelle inner membrane	359	-0.374145	-1.46023	0.00111732	0.0320988	0.0307165	2056	tags=30%, list=17%, signal=25%
Cellular component	GO:0005743	mitochondrial inner membrane	326	-0.379723	-1.47688	0.00111982	0.0320988	0.0307165	2056	tags=30%, list=17%, signal=26%
Cellular component	GO:0005759	mitochondrial matrix	316	-0.366732	-1.42374	0.00112233	0.0320988	0.0307165	2124	tags=30%, list=18%, signal=26%
Cellular component	GO:0098798	mitochondrial protein complex	183	-0.381414	-1.42231	0.00488998	0.116544	0.111526	2181	tags=30%, list=18%, signal=25%
Cellular component	GO:0005938	cell cortex	160	-0.379247	-1.39714	0.00991326	0.198857	0.190293	2817	tags=26%, list=23%, signal=20%
Cellular component	GO:0044455	mitochondrial membrane part	154	-0.381717	-1.40724	0.0111248	0.198857	0.190293	2546	tags=33%, list=21%, signal=26%
Cellular component	GO:0044454	nuclear chromosome part	345	-0.313074	-1.21942	0.0346756	0.4875	0.466507	2554	tags=23%, list=21%, signal=19%
Cellular component	GO:0098589	membrane region	185	-0.336274	-1.25533	0.0401949	0.4875	0.466507	2335	tags=24%, list=19%, signal=20%
Cellular component	GO:0045121	membrane raft	179	-0.338505	-1.26015	0.0416157	0.4875	0.466507	2335	tags=25%, list=19%, signal=20%
Cellular component	GO:0098857	membrane microdomain	179	-0.338505	-1.26015	0.0416157	0.4875	0.466507	2335	tags=25%, list=19%, signal=20%
Cellular component	GO:0015934	large ribosomal subunit	101	-0.36762	-1.29539	0.0482399	0.4875	0.466507	918	tags=15%, list=8%, signal=14%
Cellular component	GO:0016607	nuclear speck	296	-0.311609	-1.20615	0.0506757	0.4875	0.466507	1730	tags=19%, list=14%, signal=17%
Cellular component	GO:0098687	chromosomal region	264	-0.315185	-1.21504	0.0511364	0.4875	0.466507	2172	tags=21%, list=18%, signal=17%
Cellular component	GO:0000228	nuclear chromosome	375	-0.302529	-1.18519	0.0627063	0.502065	0.480445	2579	tags=23%, list=21%, signal=18%
Cellular component	GO:0099568	cytoplasmic region	254	-0.313458	-1.20187	0.0629371	0.502065	0.480445	2940	tags=24%, list=24%, signal=19%
Cellular component	GO:0030667	secretory granule membrane	159	-0.337107	-1.24215	0.063197	0.502065	0.480445	2317	tags=25%, list=19%, signal=20%
Cellular component	GO:0034399	nuclear periphery	101	-0.352001	-1.24036	0.0899609	0.648938	0.620993	2172	tags=22%, list=18%, signal=18%
Cellular component	GO:0044391	ribosomal subunit	156	-0.32639	-1.20245	0.0931677	0.648938	0.620993	1740	tags=15%, list=14%, signal=13%
Cellular component	GO:0000781	chromosome, telomeric region	124	-0.337863	-1.21581	0.0952986	0.648938	0.620993	2554	tags=24%, list=21%, signal=19%
Cellular component	GO:1990234	transferase complex	440	-0.289329	-1.13753	0.107961	0.673803	0.644787	1964	tags=21%, list=16%, signal=19%
Cellular component	GO:0030427	site of polarized growth	108	-0.337854	-1.2037	0.110825	0.673803	0.644787	2874	tags=35%, list=24%, signal=27%
Cellular component	GO:0031301	integral component of organelle membrane	107	-0.336814	-1.1972	0.115435	0.673803	0.644787	1868	tags=27%, list=16%, signal=23%
Cellular component	GO:0005741	mitochondrial outer membrane	122	-0.331679	-1.19307	0.117798	0.673803	0.644787	2590	tags=29%, list=22%, signal=23%
Cellular component	GO:0005802	trans-Golgi network	131	-0.323196	-1.17352	0.134931	0.730931	0.699455	2229	tags=27%, list=19%, signal=22%
Cellular component	GO:0031968	organelle outer membrane	139	-0.319863	-1.16869	0.145	0.730931	0.699455	2590	tags=27%, list=22%, signal=22%
Cellular component	GO:0044449	contractile fiber part	100	0.288223	1.13345	0.152542	0.730931	0.699455	2412	tags=22%, list=20%, signal=18%
Cellular component	GO:0005766	primary lysosome	103	-0.331644	-1.16999	0.153342	0.730931	0.699455	2247	tags=21%, list=19%, signal=18%
Cellular component	GO:0042582	azurophil granule	103	-0.331644	-1.16999	0.153342	0.730931	0.699455	2247	tags=21%, list=19%, signal=18%
	ID	Description	setSize	enrichmentScore	NES	pvalue	p.adjust	qvalues	rank	leading_edge
Biological Process	GO:0034660	ncRNA metabolic process	369	-0.418572	-1.63574	0.00110619	0.289837	0.282969	2031	tags=28%, list=17%, signal=24%
Biological Process	GO:0034470	ncRNA processing	249	-0.408977	-1.54927	0.00117509	0.289837	0.282969	1529	tags=25%, list=13%, signal=22%
Biological Process	GO:0016072	rRNA metabolic process	162	-0.40565	-1.47698	0.00123153	0.289837	0.282969	2021	tags=25%, list=17%, signal=21%
Biological Process	GO:0006399	tRNA metabolic process	126	-0.464722	-1.64932	0.00125471	0.289837	0.282969	1753	tags=31%, list=15%, signal=27%
Biological Process	GO:0051186	cofactor metabolic process	344	-0.352155	-1.36766	0.00337458	0.451172	0.440481	2988	tags=30%, list=25%, signal=23%
Biological Process	GO:0006732	coenzyme metabolic process	243	-0.369232	-1.4008	0.00348837	0.451172	0.440481	2988	tags=33%, list=25%, signal=25%
Biological Process	GO:0043624	cellular protein complex disassembly	148	-0.398433	-1.44649	0.00364964	0.451172	0.440481	2250	tags=30%, list=19%, signal=25%
Biological Process	GO:0032543	mitochondrial translation	102	-0.437372	-1.51463	0.00390625	0.451172	0.440481	1753	tags=31%, list=15%, signal=27%
Biological Process	GO:0051188	cofactor biosynthetic process	204	-0.379414	-1.41307	0.00591716	0.607495	0.5931	2527	tags=28%, list=21%, signal=22%
Biological Process	GO:0006631	fatty acid metabolic process	181	-0.368298	-1.35443	0.00849515	0.624264	0.609472	2488	tags=29%, list=21%, signal=24%
Biological Process	GO:0043043	peptide biosynthetic process	487	-0.323716	-1.28177	0.00864865	0.624264	0.609472	1949	tags=18%, list=16%, signal=16%
Biological Process	GO:0006412	translation	472	-0.32421	-1.2817	0.00867679	0.624264	0.609472	1949	tags=18%, list=16%, signal=16%
Biological Process	GO:0140053	mitochondrial gene expression	123	-0.399508	-1.41473	0.00878294	0.624264	0.609472	1753	tags=29%, list=15%, signal=25%
Biological Process	GO:2001252	positive regulation of chromosome organization	128	-0.391436	-1.39442	0.0111663	0.66479	0.649037	2102	tags=23%, list=18%, signal=19%
Biological Process	GO:0006364	rRNA processing	134	-0.394607	-1.41017	0.0111801	0.66479	0.649037	2021	tags=25%, list=17%, signal=21%
Biological Process	GO:0019693	ribose phosphate metabolic process	361	-0.330884	-1.29021	0.0123043	0.66479	0.649037	2434	tags=27%, list=20%, signal=22%
Biological Process	GO:0031056	regulation of histone modification	101	-0.406741	-1.40303	0.0144357	0.66479	0.649037	1880	tags=26%, list=16%, signal=22%
Biological Process	GO:0042254	ribosome biogenesis	175	-0.366891	-1.34676	0.014652	0.66479	0.649037	2021	tags=24%, list=17%, signal=20%
Biological Process	GO:0000226	microtubule cytoskeleton organization	312	-0.334922	-1.29298	0.0169683	0.66479	0.649037	2715	tags=27%, list=23%, signal=21%
Biological Process	GO:0009108	coenzyme biosynthetic process	164	-0.369539	-1.34583	0.0173053	0.66479	0.649037	2527	tags=28%, list=21%, signal=22%
Biological Process	GO:0022613	ribonucleoprotein complex biogenesis	311	-0.328582	-1.26839	0.0203851	0.66479	0.649037	1671	tags=20%, list=14%, signal=18%
Biological Process	GO:0000077	DNA damage checkpoint	108	-0.395923	-1.37898	0.020592	0.66479	0.649037	1958	tags=27%, list=16%, signal=23%
Biological Process	GO:0002440	production of molecular mediator of immune response	107	-0.396742	-1.38041	0.0219638	0.66479	0.649037	3324	tags=35%, list=28%, signal=25%
Biological Process	GO:0009150	purine ribonucleotide metabolic process	337	-0.330108	-1.28005	0.0224972	0.66479	0.649037	2434	tags=27%, list=20%, signal=22%
Biological Process	GO:0009259	ribonucleotide metabolic process	347	-0.327211	-1.27091	0.0225225	0.66479	0.649037	2434	tags=27%, list=20%, signal=22%
Biological Process	GO:0017144	drug metabolic process	464	-0.312296	-1.23192	0.0228758	0.66479	0.649037	2537	tags=25%, list=21%, signal=21%
Biological Process	GO:0006753	nucleoside phosphate metabolic process	434	-0.316027	-1.24344	0.0238612	0.66479	0.649037	2950	tags=29%, list=25%, signal=23%
Biological Process	GO:0009117	nucleotide metabolic process	432	-0.316696	-1.24582	0.0239391	0.66479	0.649037	2950	tags=29%, list=25%, signal=23%
Biological Process	GO:0072521	purine-containing compound metabolic process	366	-0.321412	-1.25481	0.025584	0.66479	0.649037	2434	tags=27%, list=20%, signal=22%
Biological Process	GO:0055086	nucleobase-containing small molecule metabolic process	488	-0.310103	-1.227	0.027115	0.66479	0.649037	2950	tags=29%, list=25%, signal=23%
	ID	Description	setSize	enrichmentScore	NES	pvalue	p.adjust	qvalues	rank	leading_edge
Molecular function	GO:0008289	lipid binding	374	-0.347869	-1.35771	0.00219539	0.144231	0.1417	2685	tags=30%, list=22%, signal=24%
Molecular function	GO:0140098	catalytic activity, acting on RNA	200	-0.395664	-1.48012	0.00240385	0.144231	0.1417	2182	tags=30%, list=18%, signal=25%
Molecular function	GO:0033218	amide binding	151	-0.379241	-1.37929	0.0125	0.5	0.491228	2905	tags=30%, list=24%, signal=23%
Molecular function	GO:0005543	phospholipid binding	234	-0.339528	-1.28467	0.0247059	0.541018	0.531527	2623	tags=28%, list=22%, signal=22%
Molecular function	GO:0042277	peptide binding	118	-0.381329	-1.34767	0.0297542	0.541018	0.531527	3028	tags=26%, list=25%, signal=20%
Molecular function	GO:0048037	cofactor binding	258	-0.32861	-1.25014	0.0347222	0.541018	0.531527	2118	tags=23%, list=18%, signal=20%
Molecular function	GO:0042623	ATPase activity, coupled	172	-0.346969	-1.28113	0.0386473	0.541018	0.531527	1684	tags=20%, list=14%, signal=18%
Molecular function	GO:0051020	GTPase binding	305	-0.320469	-1.23587	0.0394144	0.541018	0.531527	2817	tags=26%, list=23%, signal=20%
Molecular function	GO:0004721	phosphoprotein phosphatase activity	106	0.307409	1.22435	0.05	0.541018	0.531527	1453	tags=20%, list=12%, signal=18%
Molecular function	GO:0003735	structural constituent of ribosome	109	-0.363644	-1.27585	0.0574413	0.541018	0.531527	1585	tags=14%, list=13%, signal=12%
Molecular function	GO:0031267	small GTPase binding	234	-0.323641	-1.22456	0.0576471	0.541018	0.531527	2817	tags=27%, list=23%, signal=21%
Molecular function	GO:0008270	zinc ion binding	453	-0.29925	-1.17748	0.0610278	0.541018	0.531527	2303	tags=24%, list=19%, signal=20%
Molecular function	GO:0016887	ATPase activity	219	-0.326617	-1.23073	0.0629454	0.541018	0.531527	1684	tags=19%, list=14%, signal=16%
Molecular function	GO:0050662	coenzyme binding	158	-0.34245	-1.25193	0.0631188	0.541018	0.531527	2118	tags=25%, list=18%, signal=21%
Molecular function	GO:0016791	phosphatase activity	145	0.279623	1.16365	0.0858586	0.651438	0.640009	1453	tags=19%, list=12%, signal=17%
Molecular function	GO:0035091	phosphatidylinositol binding	153	-0.334744	-1.21823	0.0909091	0.651438	0.640009	2545	tags=27%, list=21%, signal=22%
Molecular function	GO:0017016	Ras GTPase binding	226	-0.31662	-1.19902	0.092723	0.651438	0.640009	2817	tags=27%, list=23%, signal=21%
Molecular function	GO:0016741	transferase activity, transferring one-carbon groups	134	-0.337221	-1.21399	0.0977157	0.651438	0.640009	2726	tags=26%, list=23%, signal=20%
Molecular function	GO:0060589	nucleoside-triphosphatase regulator activity	174	0.265246	1.12374	0.114943	0.725953	0.713217	1184	tags=17%, list=10%, signal=15%
Molecular function	GO:0022804	active transmembrane transporter activity	137	-0.328479	-1.18441	0.132409	0.794451	0.780514	2573	tags=28%, list=21%, signal=22%
Molecular function	GO:0008168	methyltransferase activity	128	-0.330822	-1.17933	0.143596	0.820551	0.806155	2726	tags=26%, list=23%, signal=20%
Molecular function	GO:0004842	ubiquitin-protein transferase activity	213	-0.301195	-1.13353	0.170616	0.841333	0.826572	2272	tags=24%, list=19%, signal=20%
Molecular function	GO:0005096	GTPase activator activity	127	0.269221	1.10694	0.173913	0.841333	0.826572	1184	tags=17%, list=10%, signal=16%
Molecular function	GO:0019787	ubiquitin-like protein transferase activity	233	-0.29996	-1.1342	0.174528	0.841333	0.826572	2272	tags=24%, list=19%, signal=20%
Molecular function	GO:0030695	GTPase regulator activity	148	0.262476	1.0988	0.176471	0.841333	0.826572	1184	tags=17%, list=10%, signal=15%
Molecular function	GO:0015077	monovalent inorganic cation transmembrane transporter activity	112	-0.326851	-1.14977	0.185864	0.841333	0.826572	3045	tags=29%, list=25%, signal=22%
Molecular function	GO:0044389	ubiquitin-like protein ligase binding	223	-0.299243	-1.12812	0.191211	0.841333	0.826572	2165	tags=20%, list=18%, signal=16%
Molecular function	GO:0019207	kinase regulator activity	101	-0.331571	-1.15404	0.196311	0.841333	0.826572	2270	tags=22%, list=19%, signal=18%
Molecular function	GO:0005215	transporter activity	445	-0.276841	-1.08891	0.2103	0.870209	0.854942	2714	tags=27%, list=23%, signal=22%
Molecular function	GO:0015318	inorganic molecular entity transmembrane transporter activity	279	-0.282218	-1.08193	0.256849	0.883865	0.868359	2813	tags=27%, list=23%, signal=21%

## Sheet: GO (ACP03)
	ID	Description	setSize	enrichmentScore	NES	pvalue	p.adjust	qvalues	rank	leading_edge
Cellular component	GO:0005813	centrosome	370	0.387503	1.33206	0.001	0.0350922	0.0299288	3454	tags=38%, list=28%, signal=28%
Cellular component	GO:0031965	nuclear membrane	210	0.402046	1.35996	0.00100705	0.0350922	0.0299288	3830	tags=36%, list=31%, signal=25%
Cellular component	GO:0000793	condensed chromosome	151	0.455377	1.52299	0.00101729	0.0350922	0.0299288	2373	tags=30%, list=19%, signal=24%
Cellular component	GO:0030027	lamellipodium	142	0.445988	1.4835	0.00102459	0.0350922	0.0299288	3744	tags=34%, list=31%, signal=24%
Cellular component	GO:0098687	chromosomal region	272	0.39352	1.34124	0.00201005	0.0475199	0.040528	2403	tags=26%, list=20%, signal=22%
Cellular component	GO:0005798	Golgi-associated vesicle	106	0.474976	1.55049	0.00208117	0.0475199	0.040528	3319	tags=33%, list=27%, signal=24%
Cellular component	GO:0030496	midbody	142	0.416999	1.38707	0.00717213	0.119459	0.101882	2463	tags=30%, list=20%, signal=24%
Cellular component	GO:0030136	clathrin-coated vesicle	108	0.4347	1.4232	0.00726141	0.119459	0.101882	3410	tags=31%, list=28%, signal=22%
Cellular component	GO:1990234	transferase complex	476	0.354539	1.22449	0.01	0.119459	0.101882	2697	tags=30%, list=22%, signal=24%
Cellular component	GO:0005635	nuclear envelope	313	0.365931	1.25496	0.0100301	0.119459	0.101882	2195	tags=24%, list=18%, signal=20%
Cellular component	GO:0030135	coated vesicle	175	0.395722	1.32781	0.0111789	0.119459	0.101882	3142	tags=26%, list=26%, signal=19%
Cellular component	GO:0031252	cell leading edge	265	0.373175	1.27057	0.0120603	0.119459	0.101882	3777	tags=29%, list=31%, signal=20%
Cellular component	GO:0005769	early endosome	223	0.379103	1.2868	0.0120724	0.119459	0.101882	3262	tags=31%, list=27%, signal=23%
Cellular component	GO:0000775	chromosome, centromeric region	152	0.402652	1.3457	0.0122075	0.119459	0.101882	2403	tags=28%, list=20%, signal=23%
Cellular component	GO:0000781	chromosome, telomeric region	126	0.409601	1.35886	0.0143443	0.131011	0.111734	2313	tags=26%, list=19%, signal=21%
Cellular component	GO:0044450	microtubule organizing center part	128	0.407235	1.35033	0.0164103	0.140513	0.119838	3623	tags=42%, list=30%, signal=30%
Cellular component	GO:0030662	coated vesicle membrane	112	0.411167	1.34694	0.0228453	0.180263	0.15374	2293	tags=22%, list=19%, signal=18%
Cellular component	GO:0044455	mitochondrial membrane part	150	0.391929	1.31088	0.0244151	0.180263	0.15374	2129	tags=30%, list=17%, signal=25%
Cellular component	GO:0005912	adherens junction	394	0.345816	1.19079	0.025	0.180263	0.15374	3749	tags=25%, list=31%, signal=18%
Cellular component	GO:0070161	anchoring junction	405	0.343102	1.18312	0.028	0.1918	0.163579	3749	tags=25%, list=31%, signal=18%
Cellular component	GO:0048471	perinuclear region of cytoplasm	464	0.339408	1.17183	0.033	0.215286	0.183609	3121	tags=28%, list=26%, signal=22%
Cellular component	GO:0015629	actin cytoskeleton	283	0.355741	1.21481	0.0361446	0.225082	0.191964	3750	tags=30%, list=31%, signal=21%
Cellular component	GO:0010008	endosome membrane	319	0.348228	1.19575	0.042042	0.249196	0.21253	3115	tags=29%, list=25%, signal=22%
Cellular component	GO:0000151	ubiquitin ligase complex	177	0.373719	1.25396	0.0436548	0.249196	0.21253	3563	tags=37%, list=29%, signal=26%
Cellular component	GO:0005765	lysosomal membrane	246	0.356502	1.21244	0.0482412	0.254194	0.216792	2374	tags=26%, list=19%, signal=21%
Cellular component	GO:0098852	lytic vacuole membrane	246	0.356502	1.21244	0.0482412	0.254194	0.216792	2374	tags=26%, list=19%, signal=21%
Cellular component	GO:0016607	nuclear speck	311	0.347402	1.19158	0.0511535	0.259556	0.221366	2877	tags=29%, list=24%, signal=23%
Cellular component	GO:0044440	endosomal part	341	0.341201	1.17321	0.059	0.288679	0.246203	3115	tags=29%, list=25%, signal=22%
Cellular component	GO:0000776	kinetochore	110	0.392513	1.2858	0.0611399	0.288833	0.246335	2373	tags=26%, list=19%, signal=21%
Cellular component	GO:0034399	nuclear periphery	101	0.3925	1.27541	0.0709812	0.314102	0.267885	3308	tags=32%, list=27%, signal=23%
	ID	Description	setSize	enrichmentScore	NES	pvalue	p.adjust	qvalues	rank	leading_edge
Biological Process	GO:0000082	G1/S transition of mitotic cell cycle	182	0.438528	1.47493	0.00101215	0.0659067	0.0572312	2889	tags=35%, list=24%, signal=27%
Biological Process	GO:0006403	RNA localization	176	0.444369	1.49036	0.00101729	0.0659067	0.0572312	2667	tags=28%, list=22%, signal=22%
Biological Process	GO:0035966	response to topologically incorrect protein	143	0.461889	1.52944	0.00102669	0.0659067	0.0572312	2493	tags=31%, list=20%, signal=25%
Biological Process	GO:0042770	signal transduction in response to DNA damage	106	0.494764	1.60832	0.00103842	0.0659067	0.0572312	2785	tags=39%, list=23%, signal=30%
Biological Process	GO:0016571	histone methylation	104	0.465259	1.50818	0.00104384	0.0659067	0.0572312	2237	tags=30%, list=18%, signal=25%
Biological Process	GO:0044257	cellular protein catabolic process	498	0.392835	1.36151	0.002	0.0659067	0.0572312	2958	tags=31%, list=24%, signal=24%
Biological Process	GO:0044770	cell cycle phase transition	436	0.39029	1.35034	0.002	0.0659067	0.0572312	2889	tags=30%, list=24%, signal=24%
Biological Process	GO:0051301	cell division	435	0.390482	1.35073	0.002	0.0659067	0.0572312	2403	tags=29%, list=20%, signal=24%
Biological Process	GO:0051603	proteolysis involved in cellular protein catabolic process	455	0.397852	1.37748	0.002	0.0659067	0.0572312	3308	tags=33%, list=27%, signal=25%
Biological Process	GO:0006511	ubiquitin-dependent protein catabolic process	403	0.395307	1.36384	0.002002	0.0659067	0.0572312	2958	tags=32%, list=24%, signal=25%
Biological Process	GO:0010498	proteasomal protein catabolic process	306	0.424769	1.4558	0.002002	0.0659067	0.0572312	2219	tags=29%, list=18%, signal=24%
Biological Process	GO:0019941	modification-dependent protein catabolic process	406	0.395602	1.36463	0.002002	0.0659067	0.0572312	2958	tags=32%, list=24%, signal=25%
Biological Process	GO:0043632	modification-dependent macromolecule catabolic process	410	0.398749	1.37638	0.002002	0.0659067	0.0572312	2958	tags=32%, list=24%, signal=25%
Biological Process	GO:0044772	mitotic cell cycle phase transition	410	0.39701	1.37038	0.002002	0.0659067	0.0572312	2889	tags=30%, list=24%, signal=24%
Biological Process	GO:1901990	regulation of mitotic cell cycle phase transition	310	0.402295	1.37949	0.002002	0.0659067	0.0572312	2889	tags=30%, list=24%, signal=23%
Biological Process	GO:0043161	proteasome-mediated ubiquitin-dependent protein catabolic process	267	0.424177	1.44519	0.00200602	0.0659067	0.0572312	2219	tags=29%, list=18%, signal=24%
Biological Process	GO:1901987	regulation of cell cycle phase transition	330	0.391745	1.34606	0.00200602	0.0659067	0.0572312	2889	tags=30%, list=24%, signal=23%
Biological Process	GO:0000209	protein polyubiquitination	232	0.421861	1.43091	0.0020141	0.0659067	0.0572312	2559	tags=33%, list=21%, signal=26%
Biological Process	GO:0030111	regulation of Wnt signaling pathway	221	0.407571	1.38035	0.0020141	0.0659067	0.0572312	3355	tags=35%, list=27%, signal=26%
Biological Process	GO:0034976	response to endoplasmic reticulum stress	205	0.425898	1.44047	0.00201613	0.0659067	0.0572312	2533	tags=30%, list=21%, signal=24%
Biological Process	GO:0044843	cell cycle G1/S phase transition	192	0.42488	1.43227	0.00201816	0.0659067	0.0572312	2889	tags=34%, list=24%, signal=27%
Biological Process	GO:0072331	signal transduction by p53 class mediator	209	0.4206	1.42293	0.00201816	0.0659067	0.0572312	2785	tags=33%, list=23%, signal=26%
Biological Process	GO:0060562	epithelial tube morphogenesis	188	0.423729	1.42768	0.0020202	0.0659067	0.0572312	4528	tags=45%, list=37%, signal=29%
Biological Process	GO:0000086	G2/M transition of mitotic cell cycle	181	0.425534	1.43132	0.00202429	0.0659067	0.0572312	2733	tags=30%, list=22%, signal=24%
Biological Process	GO:1901991	negative regulation of mitotic cell cycle phase transition	168	0.426868	1.42986	0.00203666	0.0659067	0.0572312	2879	tags=32%, list=24%, signal=25%
Biological Process	GO:0097191	extrinsic apoptotic signaling pathway	145	0.449727	1.48885	0.0020555	0.0659067	0.0572312	2879	tags=32%, list=24%, signal=25%
Biological Process	GO:0010389	regulation of G2/M transition of mitotic cell cycle	144	0.445461	1.47407	0.00205761	0.0659067	0.0572312	2877	tags=31%, list=24%, signal=24%
Biological Process	GO:0051028	mRNA transport	119	0.463816	1.51816	0.00206612	0.0659067	0.0572312	1730	tags=23%, list=14%, signal=20%
Biological Process	GO:0035967	cellular response to topologically incorrect protein	111	0.454404	1.48041	0.00207254	0.0659067	0.0572312	2493	tags=32%, list=20%, signal=25%
Biological Process	GO:2000045	regulation of G1/S transition of mitotic cell cycle	111	0.453505	1.47748	0.00207254	0.0659067	0.0572312	2889	tags=32%, list=24%, signal=25%
	ID	Description	setSize	enrichmentScore	NES	pvalue	p.adjust	qvalues	rank	leading_edge
Molecular function	GO:0061659	ubiquitin-like protein ligase activity	105	0.455065	1.47017	0.00104822	0.0567823	0.0479116	2822	tags=35%, list=23%, signal=27%
Molecular function	GO:0044389	ubiquitin-like protein ligase binding	226	0.392083	1.33726	0.00201005	0.0567823	0.0479116	2206	tags=27%, list=18%, signal=22%
Molecular function	GO:0031625	ubiquitin protein ligase binding	211	0.395756	1.34435	0.00201613	0.0567823	0.0479116	2206	tags=27%, list=18%, signal=23%
Molecular function	GO:0061630	ubiquitin protein ligase activity	101	0.455052	1.46631	0.00210748	0.0567823	0.0479116	2822	tags=35%, list=23%, signal=27%
Molecular function	GO:0004674	protein serine/threonine kinase activity	268	0.38038	1.30149	0.00300903	0.0567823	0.0479116	3152	tags=31%, list=26%, signal=23%
Molecular function	GO:0008022	protein C-terminus binding	129	0.427907	1.40286	0.00310559	0.0567823	0.0479116	3438	tags=33%, list=28%, signal=24%
Molecular function	GO:0030674	protein binding, bridging	104	0.442059	1.42668	0.00315457	0.0567823	0.0479116	2678	tags=33%, list=22%, signal=26%
Molecular function	GO:0016301	kinase activity	438	0.356664	1.23527	0.004995	0.0635081	0.0535866	3546	tags=32%, list=29%, signal=24%
Molecular function	GO:0004842	ubiquitin-protein transferase activity	229	0.388478	1.32355	0.00503525	0.0635081	0.0535866	2823	tags=34%, list=23%, signal=27%
Molecular function	GO:0019787	ubiquitin-like protein transferase activity	251	0.379214	1.29281	0.00504032	0.0635081	0.0535866	2823	tags=33%, list=23%, signal=26%
Molecular function	GO:0060090	molecular adaptor activity	148	0.406449	1.3462	0.00719424	0.0824068	0.0695329	3142	tags=34%, list=26%, signal=25%
Molecular function	GO:0060589	nucleoside-triphosphatase regulator activity	190	0.383974	1.29732	0.0121335	0.127401	0.107498	3383	tags=34%, list=28%, signal=25%
Molecular function	GO:0008047	enzyme activator activity	270	0.366308	1.25408	0.0170341	0.161323	0.13612	3240	tags=30%, list=26%, signal=22%
Molecular function	GO:0016773	phosphotransferase activity, alcohol group as acceptor	406	0.345626	1.19468	0.01998	0.161323	0.13612	3152	tags=29%, list=26%, signal=22%
Molecular function	GO:0030695	GTPase regulator activity	163	0.38255	1.28206	0.0203459	0.161323	0.13612	3383	tags=34%, list=28%, signal=25%
Molecular function	GO:0004386	helicase activity	105	0.408607	1.32008	0.0220126	0.161323	0.13612	3467	tags=31%, list=28%, signal=23%
Molecular function	GO:0004672	protein kinase activity	340	0.350537	1.20328	0.022022	0.161323	0.13612	3152	tags=29%, list=26%, signal=22%
Molecular function	GO:0045296	cadherin binding	270	0.3598	1.23179	0.0230461	0.161323	0.13612	2347	tags=19%, list=19%, signal=16%
Molecular function	GO:0019900	kinase binding	457	0.339695	1.17599	0.028971	0.192124	0.162109	2998	tags=25%, list=25%, signal=20%
Molecular function	GO:0003714	transcription corepressor activity	150	0.383529	1.27164	0.0329218	0.207407	0.175005	3326	tags=32%, list=27%, signal=24%
Molecular function	GO:0051020	GTPase binding	311	0.348532	1.1949	0.0350701	0.210421	0.177548	2435	tags=26%, list=20%, signal=21%
Molecular function	GO:0003712	transcription coregulator activity	363	0.34293	1.17976	0.037962	0.214171	0.180712	2347	tags=25%, list=19%, signal=21%
Molecular function	GO:0005096	GTPase activator activity	140	0.381996	1.26136	0.0390947	0.214171	0.180712	3343	tags=34%, list=27%, signal=25%
Molecular function	GO:0031267	small GTPase binding	246	0.351966	1.19991	0.0442211	0.223099	0.188245	4139	tags=38%, list=34%, signal=26%
Molecular function	GO:0017016	Ras GTPase binding	238	0.35448	1.20899	0.0442656	0.223099	0.188245	4139	tags=39%, list=34%, signal=26%
Molecular function	GO:0003713	transcription coactivator activity	212	0.3574	1.21447	0.0524194	0.254032	0.214346	2965	tags=29%, list=24%, signal=23%
Molecular function	GO:0005085	guanyl-nucleotide exchange factor activity	126	0.375776	1.23059	0.066459	0.305962	0.258164	3026	tags=34%, list=25%, signal=26%
Molecular function	GO:0004721	phosphoprotein phosphatase activity	109	0.382311	1.23924	0.0679916	0.305962	0.258164	3004	tags=32%, list=25%, signal=24%
Molecular function	GO:0016887	ATPase activity	221	0.350469	1.19266	0.0706357	0.3069	0.258955	2051	tags=21%, list=17%, signal=18%
Molecular function	GO:0008168	methyltransferase activity	136	0.367096	1.20792	0.0949432	0.398762	0.336466	3309	tags=37%, list=27%, signal=27%
